# Supplementary material
Source: Research Square preprint supplement (doi:10.21203/rs.3.rs-9486004/v1)
Supplement: Supplementary file 1 [file 648b921eabfbf0e0e37394bc.xlsx]

## Sheet: Figure 1b
Figure 1b	Operando electrochemical profile of the cell cycled in CCCV
Time (h)	Potential E (V vs Li-In/In)	Current I (mA)
0	3.74895	-7.78005e-07
0.00277778	3.51785	-0.0295461
0.00555556	3.50957	-0.0295423
0.00833333	3.50538	-0.0295423
0.0111111	3.50292	-0.029541
0.0138889	3.495	-0.0295415
0.0166667	3.49709	-0.0295417
0.0194444	3.49423	-0.0295396
0.0222222	3.48464	-0.0295383
0.025	3.4861	-0.0295402
0.0277778	3.48398	-0.0295397
0.0305556	3.48306	-0.0295408
0.0333333	3.47859	-0.0295421
0.0361111	3.48089	-0.0295411
0.0388889	3.47663	-0.0295423
0.0416667	3.4734	-0.029543
0.0444444	3.47131	-0.0295433
0.0472222	3.47279	-0.0295434
0.05	3.47083	-0.0295441
0.0527778	3.47087	-0.0295394
0.0555556	3.47016	-0.0295427
0.0583333	3.46624	-0.029542
0.0611111	3.46508	-0.0295411
0.0638889	3.46412	-0.0295409
0.0666667	3.46287	-0.0295407
0.0694444	3.46337	-0.0295432
0.0722222	3.45826	-0.0295405
0.075	3.46043	-0.0295401
0.0777778	3.46178	-0.029541
0.0805556	3.45797	-0.0295399
0.0833333	3.45872	-0.0295397
0.0861111	3.45618	-0.0295396
0.0888889	3.4552	-0.0295411
0.0916667	3.45203	-0.0295396
0.0944444	3.45393	-0.0295394
0.0972222	3.45112	-0.0295418
0.1	3.45106	-0.0295403
0.102778	3.45098	-0.0295424
0.105556	3.44979	-0.0295397
0.108333	3.44994	-0.0295421
0.111111	3.44575	-0.0295404
0.113889	3.44461	-0.0295406
0.116667	3.44815	-0.02954
0.119444	3.44395	-0.0295397
0.122222	3.4424	-0.0295414
0.125	3.44365	-0.0295388
0.127778	3.4426	-0.0295381
0.130556	3.44135	-0.0295404
0.133333	3.44241	-0.029542
0.136111	3.44225	-0.0295421
0.138889	3.43996	-0.0295408
0.141667	3.43866	-0.0295406
0.144444	3.43941	-0.0295409
0.147222	3.44023	-0.0295392
0.15	3.43584	-0.0295412
0.152778	3.43333	-0.0295407
0.155556	3.43572	-0.029542
0.158333	3.43583	-0.0295409
0.161111	3.43344	-0.0295399
0.163889	3.43023	-0.0295405
0.166667	3.43021	-0.0295404
0.169444	3.43458	-0.0295408
0.172222	3.43553	-0.0295401
0.175	3.42584	-0.029539
0.177778	3.43126	-0.0295411
0.180556	3.42898	-0.0295404
0.183333	3.42974	-0.0295403
0.186111	3.42692	-0.0295397
0.188889	3.42929	-0.0295415
0.191667	3.42691	-0.0295422
0.194444	3.42384	-0.0295411
0.197222	3.42539	-0.0295416
0.2	3.42488	-0.0295418
0.202778	3.42181	-0.0295423
0.205556	3.42536	-0.0295409
0.208333	3.42449	-0.0295417
0.211111	3.42306	-0.0295432
0.213889	3.42149	-0.0295424
0.216667	3.42209	-0.0295425
0.219444	3.42016	-0.0295417
0.222222	3.41949	-0.0295416
0.225	3.41872	-0.029542
0.227778	3.4199	-0.0295424
0.230556	3.41682	-0.0295404
0.233333	3.41649	-0.0295418
0.236111	3.41571	-0.0295402
0.238889	3.41342	-0.0295396
0.241667	3.41334	-0.0295427
0.244444	3.41583	-0.0295411
0.247222	3.41197	-0.0295424
0.25	3.41194	-0.0295395
0.252778	3.41059	-0.0295411
0.255556	3.41354	-0.0295416
0.258333	3.40982	-0.0295415
0.261111	3.41602	-0.0295419
0.263889	3.41615	-0.0295416
0.266667	3.40997	-0.0295383
0.269444	3.40785	-0.0295408
0.272222	3.40791	-0.0295393
0.275	3.40912	-0.0295411
0.277778	3.40631	-0.0295427
0.280556	3.40693	-0.0295424
0.283333	3.41228	-0.0295431
0.286111	3.40434	-0.0295427
0.288889	3.40957	-0.0295445
0.291667	3.40373	-0.0295406
0.294444	3.40578	-0.0295409
0.297222	3.3991	-0.0295431
0.3	3.40412	-0.0295397
0.302778	3.40429	-0.0295429
0.305556	3.40404	-0.0295424
0.308333	3.4036	-0.0295421
0.311111	3.40027	-0.029542
0.313889	3.40268	-0.0295403
0.316667	3.40189	-0.0295417
0.319444	3.40077	-0.0295414
0.322222	3.39589	-0.0295393
0.325	3.39902	-0.0295414
0.327778	3.39938	-0.0295403
0.330556	3.39586	-0.0295413
0.333333	3.39439	-0.0295411
0.336111	3.39367	-0.0295429
0.338889	3.39691	-0.0295425
0.341667	3.39397	-0.0295427
0.344444	3.39554	-0.0295426
0.347222	3.39594	-0.0295407
0.35	3.39455	-0.0295412
0.352778	3.39377	-0.0295406
0.355556	3.3933	-0.0295414
0.358333	3.39174	-0.0295428
0.361111	3.39354	-0.0295442
0.363889	3.38881	-0.0295444
0.366667	3.39381	-0.0295403
0.369444	3.39158	-0.0295432
0.372222	3.39537	-0.0295429
0.375	3.39259	-0.0295424
0.377778	3.39429	-0.0295432
0.380556	3.39143	-0.0295429
0.383333	3.38755	-0.0295438
0.386111	3.39458	-0.0295419
0.388889	3.38592	-0.0295421
0.391667	3.38471	-0.0295402
0.394444	3.38362	-0.0295416
0.397222	3.38426	-0.0295411
0.4	3.38463	-0.0295403
0.402778	3.3878	-0.0295437
0.405556	3.38613	-0.0295414
0.408333	3.38222	-0.0295411
0.411111	3.38554	-0.0295416
0.413889	3.3827	-0.029544
0.416667	3.38304	-0.0295429
0.419444	3.38301	-0.0295406
0.422222	3.37922	-0.0295435
0.425	3.38318	-0.0295418
0.427778	3.38278	-0.0295442
0.430556	3.37753	-0.0295422
0.433333	3.37656	-0.0295441
0.436111	3.38108	-0.0295425
0.438889	3.37477	-0.0295427
0.441667	3.37876	-0.0295448
0.444444	3.37743	-0.0295421
0.447222	3.3767	-0.0295414
0.45	3.3782	-0.0295415
0.452778	3.37555	-0.0295425
0.455556	3.37706	-0.0295438
0.458333	3.37588	-0.0295433
0.461111	3.37541	-0.0295409
0.463889	3.37649	-0.0295405
0.466667	3.37312	-0.0295424
0.469444	3.37536	-0.0295427
0.472222	3.37079	-0.0295424
0.475	3.37155	-0.029541
0.477778	3.37251	-0.0295409
0.480556	3.37422	-0.029542
0.483333	3.37237	-0.0295437
0.486111	3.37015	-0.0295401
0.488889	3.37272	-0.0295413
0.491667	3.37293	-0.0295403
0.494444	3.36853	-0.0295416
0.497222	3.36882	-0.0295403
0.5	3.36889	-0.0295423
0.502778	3.36734	-0.0295401
0.505556	3.36639	-0.02954
0.508333	3.36908	-0.0295399
0.511111	3.36858	-0.0295405
0.513889	3.36511	-0.0295424
0.516667	3.37044	-0.0295402
0.519444	3.36881	-0.0295401
0.522222	3.36675	-0.02954
0.525	3.36636	-0.0295406
0.527778	3.36439	-0.0295396
0.530556	3.36449	-0.0295391
0.533333	3.364	-0.0295386
0.536111	3.36408	-0.0295414
0.538889	3.36508	-0.0295421
0.541667	3.3625	-0.0295419
0.544444	3.3593	-0.0295422
0.547222	3.36082	-0.0295422
0.55	3.36164	-0.0295414
0.552778	3.35765	-0.0295409
0.555556	3.36152	-0.0295404
0.558333	3.35824	-0.0295433
0.561111	3.36196	-0.0295417
0.563889	3.36224	-0.0295427
0.566667	3.35834	-0.0295434
0.569444	3.35751	-0.0295437
0.572222	3.35626	-0.029544
0.575	3.35848	-0.0295423
0.577778	3.35903	-0.0295388
0.580556	3.35692	-0.0295397
0.583333	3.35681	-0.0295395
0.586111	3.3518	-0.0295417
0.588889	3.35882	-0.0295402
0.591667	3.36218	-0.0295422
0.594444	3.35473	-0.0295411
0.597222	3.35261	-0.0295388
0.6	3.35436	-0.0295396
0.602778	3.35353	-0.0295414
0.605556	3.34992	-0.029541
0.608333	3.35285	-0.0295405
0.611111	3.35272	-0.0295408
0.613889	3.35562	-0.0295398
0.616667	3.34872	-0.0295432
0.619444	3.34902	-0.0295407
0.622222	3.35117	-0.0295426
0.625	3.35029	-0.0295418
0.627778	3.34935	-0.0295414
0.630556	3.35525	-0.0295445
0.633333	3.3506	-0.0295416
0.636111	3.35089	-0.0295409
0.638889	3.34695	-0.029542
0.641667	3.34949	-0.0295425
0.644444	3.34931	-0.0295416
0.647222	3.34937	-0.0295427
0.65	3.34815	-0.0295406
0.652778	3.34869	-0.0295407
0.655556	3.3505	-0.0295416
0.658333	3.34889	-0.029543
0.661111	3.3449	-0.0295434
0.663889	3.34745	-0.0295407
0.666667	3.34635	-0.0295415
0.669444	3.347	-0.029544
0.672222	3.34619	-0.0295419
0.675	3.34532	-0.0295432
0.677778	3.34382	-0.0295423
0.680556	3.34262	-0.0295421
0.683333	3.34097	-0.0295412
0.686111	3.34502	-0.0295416
0.688889	3.34622	-0.0295405
0.691667	3.34358	-0.0295427
0.694444	3.33938	-0.0295411
0.697222	3.33785	-0.0295417
0.7	3.34389	-0.0295393
0.702778	3.34067	-0.0295408
0.705556	3.34359	-0.029539
0.708333	3.34054	-0.0295398
0.711111	3.33961	-0.0295418
0.713889	3.34054	-0.0295398
0.716667	3.34112	-0.0295383
0.719444	3.33615	-0.0295412
0.722222	3.34097	-0.0295425
0.725	3.33844	-0.0295405
0.727778	3.33899	-0.0295418
0.730556	3.33632	-0.0295391
0.733333	3.3347	-0.0295417
0.736111	3.33871	-0.0295404
0.738889	3.33687	-0.0295418
0.741667	3.33617	-0.0295406
0.744444	3.33991	-0.0295401
0.747222	3.33464	-0.0295384
0.75	3.33764	-0.0295386
0.752778	3.33289	-0.0295386
0.755556	3.33708	-0.0295391
0.758333	3.33557	-0.0295405
0.761111	3.3389	-0.0295406
0.763889	3.33192	-0.0295408
0.766667	3.33644	-0.029541
0.769444	3.32995	-0.0295402
0.772222	3.33029	-0.0295407
0.775	3.32916	-0.0295412
0.777778	3.32947	-0.0295394
0.780556	3.33051	-0.0295421
0.783333	3.33254	-0.0295415
0.786111	3.33173	-0.0295394
0.788889	3.33272	-0.0295427
0.791667	3.33264	-0.029541
0.794444	3.32977	-0.0295406
0.797222	3.33052	-0.0295425
0.8	3.33039	-0.0295422
0.802778	3.3275	-0.0295409
0.805556	3.32862	-0.0295421
0.808333	3.32796	-0.0295415
0.811111	3.3278	-0.0295403
0.813889	3.3295	-0.0295407
0.816667	3.32756	-0.0295406
0.819444	3.32715	-0.0295429
0.822222	3.32523	-0.0295409
0.825	3.32777	-0.0295439
0.827778	3.32446	-0.0295436
0.830556	3.32378	-0.0295427
0.833333	3.32344	-0.0295429
0.836111	3.32408	-0.0295412
0.838889	3.3224	-0.0295443
0.841667	3.32402	-0.0295425
0.844444	3.32524	-0.0295413
0.847222	3.32115	-0.0295407
0.85	3.3265	-0.0295415
0.852778	3.32346	-0.02954
0.855556	3.32581	-0.0295414
0.858333	3.31605	-0.0295409
0.861111	3.3229	-0.0295385
0.863889	3.32365	-0.0295394
0.866667	3.32083	-0.0295375
0.869444	3.32197	-0.0295392
0.872222	3.32468	-0.0295393
0.875	3.32092	-0.0295417
0.877778	3.31957	-0.0295431
0.880556	3.32462	-0.0295428
0.883333	3.31623	-0.0295426
0.886111	3.32061	-0.0295435
0.888889	3.32237	-0.0295441
0.891667	3.32081	-0.0295436
0.894444	3.32197	-0.029542
0.897222	3.31942	-0.0295409
0.9	3.31875	-0.0295423
0.902778	3.31521	-0.0295422
0.905556	3.31595	-0.0295429
0.908333	3.31595	-0.0295388
0.911111	3.31494	-0.0295416
0.913889	3.31477	-0.0295411
0.916667	3.3122	-0.0295388
0.919444	3.31443	-0.0295413
0.922222	3.31518	-0.0295413
0.925	3.31204	-0.0295416
0.927778	3.3134	-0.0295401
0.930556	3.31417	-0.0295384
0.933333	3.31098	-0.0295413
0.936111	3.31311	-0.0295381
0.938889	3.311	-0.0295398
0.941667	3.31632	-0.0295414
0.944444	3.30903	-0.0295404
0.947222	3.31505	-0.0295381
0.95	3.3116	-0.0295381
0.952778	3.31353	-0.0295419
0.955556	3.30826	-0.0295406
0.958333	3.31247	-0.02954
0.961111	3.31123	-0.0295428
0.963889	3.31165	-0.0295421
0.966667	3.30954	-0.0295431
0.969444	3.30591	-0.0295409
0.972222	3.30499	-0.0295421
0.975	3.31437	-0.0295414
0.977778	3.31045	-0.029542
0.980556	3.31004	-0.029541
0.983333	3.30847	-0.029544
0.986111	3.30876	-0.0295438
0.988889	3.30564	-0.0295422
0.991667	3.31005	-0.0295443
0.994444	3.31302	-0.029542
0.997222	3.30653	-0.0295417
1	3.30473	-0.0295432
1.00278	3.30524	-0.0295416
1.00556	3.30668	-0.0295408
1.00833	3.3074	-0.0295438
1.01111	3.30616	-0.0295406
1.01389	3.30457	-0.0295433
1.01667	3.30533	-0.0295414
1.01944	3.3056	-0.0295396
1.02222	3.30266	-0.0295404
1.025	3.3011	-0.0295417
1.02778	3.30257	-0.0295405
1.03056	3.30417	-0.0295409
1.03333	3.30334	-0.0295399
1.03611	3.30407	-0.0295411
1.03889	3.30458	-0.0295413
1.04167	3.30396	-0.0295402
1.04444	3.30578	-0.0295405
1.04722	3.30045	-0.0295384
1.05	3.3038	-0.0295393
1.05278	3.30406	-0.0295415
1.05556	3.30027	-0.0295424
1.05833	3.30153	-0.0295414
1.06111	3.29883	-0.0295406
1.06389	3.29632	-0.0295409
1.06667	3.29934	-0.0295422
1.06944	3.29763	-0.0295431
1.07222	3.29857	-0.0295403
1.075	3.3036	-0.0295399
1.07778	3.30102	-0.0295415
1.08056	3.30173	-0.0295405
1.08333	3.29819	-0.0295423
1.08611	3.29999	-0.0295401
1.08889	3.29673	-0.0295417
1.09167	3.29842	-0.0295417
1.09444	3.29965	-0.0295409
1.09722	3.29871	-0.0295406
1.1	3.29296	-0.0295399
1.10278	3.29395	-0.0295396
1.10556	3.29707	-0.0295404
1.10833	3.29319	-0.0295397
1.11111	3.29705	-0.0295403
1.11389	3.29517	-0.0295406
1.11667	3.29206	-0.0295401
1.11944	3.296	-0.0295411
1.12222	3.29723	-0.0295396
1.125	3.29637	-0.0295386
1.12778	3.29408	-0.0295402
1.13056	3.2907	-0.0295407
1.13333	3.29237	-0.0295399
1.13611	3.29626	-0.0295404
1.13889	3.29255	-0.0295421
1.14167	3.29344	-0.0295404
1.14444	3.28473	-0.0295425
1.14722	3.29281	-0.0295412
1.15	3.29017	-0.0295419
1.15278	3.29139	-0.0295426
1.15556	3.28538	-0.0295419
1.15833	3.29212	-0.0295414
1.16111	3.28886	-0.0295412
1.16389	3.28852	-0.0295413
1.16667	3.28654	-0.0295386
1.16944	3.28472	-0.0295389
1.17222	3.29209	-0.0295434
1.175	3.29263	-0.0295419
1.17778	3.28739	-0.0295425
1.18056	3.28786	-0.0295406
1.18333	3.28679	-0.0295418
1.18611	3.288	-0.0295405
1.18889	3.29082	-0.0295414
1.19167	3.28663	-0.0295395
1.19444	3.28862	-0.0295427
1.19722	3.28571	-0.0295404
1.2	3.28986	-0.02954
1.20278	3.28482	-0.0295409
1.20556	3.28166	-0.0295435
1.20833	3.28788	-0.0295446
1.21111	3.2829	-0.0295432
1.21389	3.28576	-0.0295438
1.21667	3.28141	-0.0295426
1.21944	3.28558	-0.0295427
1.22222	3.28934	-0.0295436
1.225	3.28711	-0.0295412
1.22778	3.27943	-0.0295432
1.23056	3.28256	-0.0295431
1.23333	3.28479	-0.0295429
1.23611	3.28869	-0.0295444
1.23889	3.27956	-0.0295408
1.24167	3.28455	-0.0295426
1.24444	3.2835	-0.0295418
1.24722	3.2796	-0.02954
1.25	3.28392	-0.0295397
1.25278	3.28353	-0.0295378
1.25556	3.28745	-0.0295396
1.25833	3.28127	-0.029539
1.26111	3.28383	-0.0295395
1.26389	3.2829	-0.029537
1.26667	3.28075	-0.0295407
1.26944	3.2816	-0.0295398
1.27222	3.2822	-0.0295391
1.275	3.27748	-0.0295405
1.27778	3.28388	-0.0295435
1.28056	3.27922	-0.0295414
1.28333	3.28008	-0.0295417
1.28611	3.28318	-0.0295411
1.28889	3.27864	-0.0295417
1.29167	3.27562	-0.0295433
1.29444	3.27561	-0.0295391
1.29722	3.27867	-0.0295409
1.3	3.27754	-0.0295402
1.30278	3.28028	-0.0295411
1.30556	3.2791	-0.0295411
1.30833	3.27859	-0.0295413
1.31111	3.27564	-0.0295428
1.31389	3.27623	-0.0295387
1.31667	3.27684	-0.0295408
1.31944	3.27439	-0.029539
1.32222	3.27615	-0.0295396
1.325	3.27943	-0.0295425
1.32778	3.27252	-0.0295397
1.33056	3.2732	-0.029541
1.33333	3.27811	-0.0295419
1.33611	3.27458	-0.0295411
1.33889	3.27314	-0.0295421
1.34167	3.26988	-0.0295427
1.34444	3.2748	-0.0295427
1.34722	3.27418	-0.0295416
1.35	3.26945	-0.0295439
1.35278	3.26919	-0.0295412
1.35556	3.27151	-0.0295422
1.35833	3.27334	-0.0295416
1.36111	3.27087	-0.0295407
1.36389	3.27843	-0.029543
1.36667	3.27161	-0.0295422
1.36944	3.26981	-0.0295415
1.37222	3.26875	-0.0295421
1.375	3.27141	-0.029538
1.37778	3.26873	-0.0295393
1.38056	3.26982	-0.0295393
1.38333	3.27371	-0.0295419
1.38611	3.26282	-0.0295415
1.38889	3.26904	-0.0295422
1.39167	3.26823	-0.0295417
1.39444	3.27017	-0.0295431
1.39722	3.26641	-0.029543
1.4	3.26883	-0.02954
1.40278	3.26841	-0.0295428
1.40556	3.26904	-0.0295427
1.40833	3.26925	-0.0295422
1.41111	3.2712	-0.0295419
1.41389	3.26831	-0.0295426
1.41667	3.27106	-0.0295417
1.41944	3.26344	-0.0295425
1.42222	3.26773	-0.0295419
1.425	3.26661	-0.0295413
1.42778	3.26565	-0.0295417
1.43056	3.26349	-0.0295412
1.43333	3.26733	-0.0295402
1.43611	3.26671	-0.0295422
1.43889	3.26403	-0.0295412
1.44167	3.26791	-0.0295421
1.44444	3.26395	-0.029541
1.44722	3.26897	-0.0295416
1.45	3.26422	-0.0295413
1.45278	3.2621	-0.0295395
1.45556	3.25819	-0.029538
1.45833	3.26366	-0.0295422
1.46111	3.26077	-0.0295429
1.46389	3.26108	-0.0295409
1.46667	3.2674	-0.0295396
1.46944	3.26214	-0.0295424
1.47222	3.26429	-0.0295403
1.475	3.26128	-0.0295403
1.47778	3.26141	-0.0295394
1.48056	3.26081	-0.0295433
1.48333	3.26086	-0.0295374
1.48611	3.25951	-0.0295392
1.48889	3.26051	-0.0295403
1.49167	3.26044	-0.0295416
1.49444	3.26079	-0.0295425
1.49722	3.25815	-0.0295417
1.5	3.2604	-0.0295427
1.50278	3.26	-0.0295431
1.50556	3.26273	-0.0295426
1.50833	3.26021	-0.0295416
1.51111	3.26046	-0.0295426
1.51389	3.25965	-0.0295398
1.51667	3.25889	-0.0295405
1.51944	3.25617	-0.0295414
1.52222	3.25375	-0.0295424
1.525	3.25427	-0.0295392
1.52778	3.25804	-0.0295422
1.53056	3.25518	-0.0295423
1.53333	3.26093	-0.029541
1.53611	3.25482	-0.0295423
1.53889	3.25861	-0.0295422
1.54167	3.25737	-0.0295435
1.54444	3.25675	-0.029542
1.54722	3.2573	-0.0295402
1.55	3.25907	-0.0295431
1.55278	3.25542	-0.0295416
1.55556	3.2565	-0.0295406
1.55833	3.25537	-0.0295422
1.56111	3.25309	-0.0295411
1.56389	3.25666	-0.0295423
1.56667	3.25057	-0.0295394
1.56944	3.25699	-0.0295411
1.57222	3.25129	-0.0295401
1.575	3.25327	-0.0295404
1.57778	3.25425	-0.0295419
1.58056	3.25289	-0.0295405
1.58333	3.25369	-0.0295408
1.58611	3.25177	-0.0295415
1.58889	3.2514	-0.0295405
1.59167	3.25516	-0.0295412
1.59444	3.25064	-0.0295411
1.59722	3.25258	-0.0295412
1.6	3.24971	-0.0295423
1.60278	3.25299	-0.0295414
1.60556	3.25296	-0.0295418
1.60833	3.25034	-0.0295403
1.61111	3.25145	-0.0295399
1.61389	3.25093	-0.0295411
1.61667	3.24882	-0.0295417
1.61944	3.25201	-0.0295403
1.62222	3.24838	-0.0295402
1.625	3.24705	-0.0295399
1.62778	3.25012	-0.0295399
1.63056	3.24464	-0.0295394
1.63333	3.24572	-0.0295404
1.63611	3.25035	-0.029539
1.63889	3.24629	-0.0295421
1.64167	3.24684	-0.0295417
1.64444	3.24387	-0.0295417
1.64722	3.24736	-0.0295409
1.65	3.24858	-0.0295396
1.65278	3.24826	-0.0295402
1.65556	3.2444	-0.0295408
1.65833	3.25087	-0.029543
1.66111	3.24489	-0.0295404
1.66389	3.24344	-0.02954
1.66667	3.24299	-0.0295413
1.66944	3.24758	-0.0295421
1.67222	3.24219	-0.0295427
1.675	3.24509	-0.0295431
1.67778	3.24879	-0.0295398
1.68056	3.2431	-0.0295404
1.68333	3.24243	-0.0295402
1.68611	3.24476	-0.0295393
1.68889	3.24911	-0.0295402
1.69167	3.24459	-0.0295399
1.69444	3.24793	-0.0295385
1.69722	3.24125	-0.0295404
1.7	3.24377	-0.0295403
1.70278	3.24485	-0.0295391
1.70556	3.24067	-0.0295394
1.70833	3.24268	-0.0295396
1.71111	3.24381	-0.0295407
1.71389	3.24221	-0.0295401
1.71667	3.24311	-0.0295402
1.71944	3.24289	-0.0295395
1.72222	3.24129	-0.02954
1.725	3.24042	-0.0295403
1.72778	3.24421	-0.0295385
1.73056	3.23942	-0.0295388
1.73333	3.24005	-0.0295399
1.73611	3.23682	-0.0295386
1.73889	3.24015	-0.0295398
1.74167	3.23895	-0.0295401
1.74444	3.2383	-0.0295389
1.74722	3.23965	-0.0295419
1.75	3.23799	-0.0295414
1.75278	3.23535	-0.0295412
1.75556	3.23763	-0.0295413
1.75833	3.23814	-0.0295414
1.76111	3.23835	-0.0295394
1.76389	3.2415	-0.0295385
1.76667	3.23417	-0.0295413
1.76944	3.24049	-0.0295378
1.77222	3.23613	-0.0295396
1.775	3.23638	-0.029541
1.77778	3.23724	-0.0295421
1.78056	3.23854	-0.0295441
1.78333	3.23397	-0.0295408
1.78611	3.23485	-0.0295386
1.78889	3.23479	-0.0295409
1.79167	3.23593	-0.0295398
1.79444	3.23382	-0.0295414
1.79722	3.23355	-0.0295412
1.8	3.23496	-0.029541
1.80278	3.23426	-0.0295413
1.80556	3.23312	-0.02954
1.80833	3.23407	-0.029539
1.81111	3.2333	-0.0295429
1.81389	3.2337	-0.029541
1.81667	3.22964	-0.0295416
1.81944	3.23143	-0.0295412
1.82222	3.23443	-0.0295434
1.825	3.23413	-0.0295423
1.82778	3.23224	-0.0295426
1.83056	3.23259	-0.0295406
1.83333	3.23132	-0.0295408
1.83611	3.22902	-0.0295426
1.83889	3.23165	-0.0295413
1.84167	3.23459	-0.0295427
1.84444	3.23113	-0.0295435
1.84722	3.23157	-0.0295439
1.85	3.22692	-0.0295421
1.85278	3.23116	-0.029543
1.85556	3.23069	-0.0295428
1.85833	3.22805	-0.0295428
1.86111	3.22854	-0.0295434
1.86389	3.22998	-0.0295416
1.86667	3.23159	-0.0295411
1.86944	3.22995	-0.0295415
1.87222	3.22682	-0.0295404
1.875	3.22692	-0.0295422
1.87778	3.22955	-0.0295412
1.88056	3.22839	-0.0295412
1.88333	3.22618	-0.0295429
1.88611	3.22889	-0.029544
1.88889	3.22788	-0.0295417
1.89167	3.22723	-0.0295437
1.89444	3.2275	-0.0295413
1.89722	3.23284	-0.0295403
1.9	3.22451	-0.0295415
1.90278	3.22598	-0.0295413
1.90556	3.22897	-0.0295399
1.90833	3.22982	-0.0295405
1.91111	3.22666	-0.0295401
1.91389	3.22569	-0.0295396
1.91667	3.23099	-0.0295375
1.91944	3.22354	-0.0295399
1.92222	3.22763	-0.0295385
1.925	3.22127	-0.02954
1.92778	3.22694	-0.0295367
1.93056	3.22367	-0.0295395
1.93333	3.22576	-0.0295418
1.93611	3.22574	-0.0295402
1.93889	3.22632	-0.0295424
1.94167	3.22575	-0.0295419
1.94444	3.22351	-0.0295396
1.94722	3.22716	-0.0295411
1.95	3.222	-0.0295392
1.95278	3.2264	-0.0295417
1.95556	3.22589	-0.0295428
1.95833	3.22147	-0.0295409
1.96111	3.21877	-0.0295416
1.96389	3.22297	-0.0295432
1.96667	3.22109	-0.0295424
1.96944	3.21964	-0.029542
1.97222	3.22006	-0.0295412
1.975	3.22174	-0.0295402
1.97778	3.21902	-0.0295386
1.98056	3.222	-0.0295377
1.98333	3.22032	-0.0295397
1.98611	3.22082	-0.0295402
1.98889	3.21984	-0.0295382
1.99167	3.21888	-0.0295398
1.99444	3.2198	-0.0295402
1.99722	3.21842	-0.0295405
2	3.22086	-0.0295415
2.00278	3.21913	-0.0295408
2.00556	3.21627	-0.0295406
2.00833	3.2205	-0.0295417
2.01111	3.22418	-0.0295402
2.01389	3.2173	-0.029543
2.01667	3.21968	-0.0295414
2.01944	3.21993	-0.0295401
2.02222	3.21928	-0.0295382
2.025	3.22048	-0.0295411
2.02778	3.21986	-0.0295424
2.03056	3.21518	-0.029539
2.03333	3.22106	-0.0295371
2.03611	3.21754	-0.0295422
2.03889	3.22082	-0.0295409
2.04167	3.21527	-0.029543
2.04444	3.21615	-0.0295394
2.04722	3.21359	-0.0295398
2.05	3.20942	-0.0295389
2.05278	3.21582	-0.0295396
2.05556	3.2145	-0.0295403
2.05833	3.21785	-0.0295384
2.06111	3.21639	-0.0295393
2.06389	3.21593	-0.0295391
2.06667	3.2126	-0.0295383
2.06944	3.21265	-0.029538
2.07222	3.21118	-0.0295398
2.075	3.21351	-0.0295432
2.07778	3.21393	-0.0295417
2.08056	3.21108	-0.0295411
2.08333	3.21448	-0.0295429
2.08611	3.21294	-0.0295414
2.08889	3.21285	-0.0295404
2.09167	3.21299	-0.0295387
2.09444	3.21192	-0.0295376
2.09722	3.20922	-0.0295395
2.1	3.21337	-0.0295375
2.10278	3.21627	-0.0295397
2.10556	3.21213	-0.0295395
2.10833	3.21137	-0.0295373
2.11111	3.20908	-0.0295392
2.11389	3.21043	-0.0295393
2.11667	3.21344	-0.0295393
2.11944	3.20867	-0.0295381
2.12222	3.20767	-0.0295375
2.125	3.20749	-0.0295394
2.12778	3.20952	-0.0295405
2.13056	3.20902	-0.0295392
2.13333	3.2104	-0.0295432
2.13611	3.21114	-0.0295395
2.13889	3.21291	-0.0295393
2.14167	3.2094	-0.029543
2.14444	3.20654	-0.0295416
2.14722	3.20921	-0.0295413
2.15	3.2064	-0.029541
2.15278	3.20672	-0.0295404
2.15556	3.20807	-0.0295418
2.15833	3.20761	-0.0295408
2.16111	3.20819	-0.0295411
2.16389	3.20712	-0.0295396
2.16667	3.20635	-0.0295394
2.16944	3.20716	-0.0295392
2.17222	3.20691	-0.0295409
2.175	3.20961	-0.0295378
2.17778	3.20754	-0.0295391
2.18056	3.20876	-0.0295404
2.18333	3.20624	-0.0295399
2.18611	3.20624	-0.0295372
2.18889	3.2046	-0.029539
2.19167	3.20859	-0.0295409
2.19444	3.20209	-0.029541
2.19722	3.20358	-0.0295404
2.2	3.2073	-0.0295402
2.20278	3.20441	-0.0295389
2.20556	3.20354	-0.0295401
2.20833	3.20637	-0.0295384
2.21111	3.20483	-0.0295381
2.21389	3.20219	-0.0295354
2.21667	3.20585	-0.0295382
2.21944	3.20445	-0.0295384
2.22222	3.20573	-0.0295369
2.225	3.20342	-0.029538
2.22778	3.20266	-0.029538
2.23056	3.2048	-0.0295386
2.23333	3.20064	-0.0295359
2.23611	3.20497	-0.0295365
2.23889	3.20514	-0.029536
2.24167	3.20271	-0.0295367
2.24444	3.20161	-0.0295357
2.24722	3.20086	-0.0295385
2.25	3.2004	-0.0295401
2.25278	3.20063	-0.0295404
2.25556	3.19841	-0.0295397
2.25833	3.20281	-0.029538
2.26111	3.20409	-0.0295381
2.26389	3.20029	-0.0295398
2.26667	3.2004	-0.0295402
2.26944	3.20302	-0.0295404
2.27222	3.19731	-0.0295414
2.275	3.19896	-0.0295407
2.27778	3.19446	-0.0295372
2.28056	3.19654	-0.0295392
2.28333	3.20212	-0.0295382
2.28611	3.19832	-0.0295399
2.28889	3.19726	-0.0295385
2.29167	3.19888	-0.0295383
2.29444	3.19708	-0.0295392
2.29722	3.19969	-0.0295414
2.3	3.19592	-0.0295385
2.30278	3.20105	-0.0295383
2.30556	3.19596	-0.0295413
2.30833	3.19569	-0.0295403
2.31111	3.19737	-0.0295406
2.31389	3.19654	-0.0295371
2.31667	3.19471	-0.0295388
2.31944	3.19739	-0.0295364
2.32222	3.19753	-0.0295394
2.325	3.19823	-0.0295395
2.32778	3.19865	-0.0295384
2.33056	3.19916	-0.0295391
2.33333	3.19775	-0.0295377
2.33611	3.19684	-0.0295389
2.33889	3.19783	-0.0295385
2.34167	3.19505	-0.0295398
2.34444	3.19486	-0.0295415
2.34722	3.19441	-0.0295408
2.35	3.19232	-0.0295413
2.35278	3.19464	-0.0295406
2.35556	3.19532	-0.0295388
2.35833	3.19085	-0.0295409
2.36111	3.19267	-0.0295408
2.36389	3.19327	-0.0295374
2.36667	3.19342	-0.0295393
2.36944	3.19189	-0.0295411
2.37222	3.19042	-0.0295381
2.375	3.19207	-0.0295401
2.37778	3.19487	-0.0295374
2.38056	3.19157	-0.0295393
2.38333	3.19478	-0.029541
2.38611	3.19652	-0.0295402
2.38889	3.19205	-0.0295398
2.39167	3.19116	-0.0295392
2.39444	3.19528	-0.0295384
2.39722	3.19019	-0.0295385
2.4	3.19287	-0.0295404
2.40278	3.18732	-0.0295415
2.40556	3.1882	-0.0295394
2.40833	3.18419	-0.0295407
2.41111	3.19133	-0.0295411
2.41389	3.19276	-0.0295395
2.41667	3.18821	-0.0295402
2.41944	3.18898	-0.0295385
2.42222	3.1893	-0.0295391
2.425	3.1888	-0.0295391
2.42778	3.19011	-0.029539
2.43056	3.18384	-0.0295412
2.43333	3.1865	-0.0295417
2.43611	3.19006	-0.0295411
2.43889	3.18987	-0.0295422
2.44167	3.19036	-0.0295409
2.44444	3.18585	-0.0295416
2.44722	3.18769	-0.0295394
2.45	3.18779	-0.0295404
2.45278	3.18842	-0.0295396
2.45556	3.18523	-0.0295399
2.45833	3.18894	-0.0295423
2.46111	3.18474	-0.0295391
2.46389	3.18919	-0.0295416
2.46667	3.18957	-0.0295426
2.46944	3.18509	-0.0295431
2.47222	3.1844	-0.029543
2.475	3.18238	-0.029543
2.47778	3.18309	-0.0295423
2.48056	3.18529	-0.0295402
2.48333	3.18565	-0.02954
2.48611	3.18217	-0.029542
2.48889	3.1829	-0.0295414
2.49167	3.18102	-0.0295415
2.49444	3.183	-0.0295412
2.49722	3.18414	-0.0295392
2.5	3.18353	-0.0295407
2.50278	3.18507	-0.0295415
2.50556	3.18297	-0.0295433
2.50833	3.18567	-0.0295428
2.51111	3.17976	-0.0295414
2.51389	3.17787	-0.0295418
2.51667	3.18499	-0.0295403
2.51944	3.18235	-0.02954
2.52222	3.18173	-0.0295393
2.525	3.18358	-0.0295393
2.52778	3.18022	-0.0295412
2.53056	3.18278	-0.0295412
2.53333	3.17931	-0.0295419
2.53611	3.18172	-0.0295411
2.53889	3.18115	-0.0295411
2.54167	3.17803	-0.0295403
2.54444	3.18251	-0.02954
2.54722	3.18424	-0.0295412
2.55	3.18106	-0.0295395
2.55278	3.17848	-0.0295421
2.55556	3.17806	-0.0295416
2.55833	3.17668	-0.0295412
2.56111	3.17751	-0.0295414
2.56389	3.18033	-0.0295408
2.56667	3.18095	-0.0295397
2.56944	3.18156	-0.0295384
2.57222	3.17871	-0.0295388
2.575	3.18176	-0.0295394
2.57778	3.17701	-0.0295419
2.58056	3.17671	-0.0295429
2.58333	3.17636	-0.0295432
2.58611	3.18178	-0.0295394
2.58889	3.18182	-0.0295402
2.59167	3.1758	-0.02954
2.59444	3.17603	-0.0295396
2.59722	3.17732	-0.0295394
2.6	3.17928	-0.0295407
2.60278	3.17874	-0.0295404
2.60556	3.18053	-0.0295402
2.60833	3.17857	-0.0295394
2.61111	3.17725	-0.0295393
2.61389	3.17564	-0.0295393
2.61667	3.17423	-0.0295383
2.61944	3.17761	-0.0295394
2.62222	3.17219	-0.0295393
2.625	3.17536	-0.0295372
2.62778	3.17516	-0.0295404
2.63056	3.17766	-0.0295413
2.63333	3.17762	-0.0295407
2.63611	3.17473	-0.0295411
2.63889	3.17454	-0.0295365
2.64167	3.17325	-0.0295411
2.64444	3.1775	-0.02954
2.64722	3.17265	-0.0295384
2.65	3.17265	-0.0295373
2.65278	3.16796	-0.0295424
2.65556	3.17169	-0.0295393
2.65833	3.17208	-0.0295406
2.66111	3.17358	-0.0295397
2.66389	3.17172	-0.0295411
2.66667	3.17535	-0.0295397
2.66944	3.17074	-0.0295381
2.67222	3.17164	-0.029537
2.675	3.16918	-0.0295377
2.67778	3.17301	-0.0295376
2.68056	3.17333	-0.02954
2.68333	3.17497	-0.0295397
2.68611	3.17329	-0.0295378
2.68889	3.17469	-0.0295411
2.69167	3.16552	-0.0295415
2.69444	3.17632	-0.0295402
2.69722	3.16837	-0.0295393
2.7	3.16638	-0.0295387
2.70278	3.17607	-0.0295392
2.70556	3.16965	-0.0295385
2.70833	3.16754	-0.0295394
2.71111	3.16903	-0.029541
2.71389	3.16973	-0.0295409
2.71667	3.16998	-0.0295381
2.71944	3.16983	-0.029539
2.72222	3.1695	-0.0295416
2.725	3.1647	-0.0295404
2.72778	3.17217	-0.0295384
2.73056	3.1688	-0.029538
2.73333	3.16747	-0.0295393
2.73611	3.16858	-0.0295379
2.73889	3.16655	-0.0295383
2.74167	3.16973	-0.0295392
2.74444	3.16632	-0.0295399
2.74722	3.17017	-0.0295386
2.75	3.17107	-0.029541
2.75278	3.16648	-0.0295418
2.75556	3.16655	-0.02954
2.75833	3.16405	-0.0295398
2.76111	3.16997	-0.0295408
2.76389	3.1671	-0.0295405
2.76667	3.15658	-0.0295395
2.76944	3.168	-0.0295419
2.77222	3.16332	-0.0295382
2.775	3.1662	-0.0295397
2.77778	3.16422	-0.0295392
2.78056	3.1644	-0.0295403
2.78333	3.16267	-0.029542
2.78611	3.16652	-0.0295411
2.78889	3.16282	-0.0295409
2.79167	3.1671	-0.0295416
2.79444	3.16439	-0.0295402
2.79722	3.16637	-0.0295404
2.8	3.16495	-0.0295399
2.80278	3.16022	-0.0295412
2.80556	3.16204	-0.0295414
2.80833	3.16318	-0.0295419
2.81111	3.16221	-0.0295375
2.81389	3.16396	-0.0295394
2.81667	3.15858	-0.029542
2.81944	3.16123	-0.029539
2.82222	3.16026	-0.02954
2.825	3.16192	-0.02954
2.82778	3.16621	-0.0295387
2.83056	3.15983	-0.0295395
2.83333	3.1605	-0.0295391
2.83611	3.15988	-0.0295379
2.83889	3.16031	-0.0295382
2.84167	3.16013	-0.0295381
2.84444	3.15916	-0.0295408
2.84722	3.16385	-0.0295387
2.85	3.15786	-0.029541
2.85278	3.15995	-0.0295423
2.85556	3.16248	-0.0295421
2.85833	3.16081	-0.029541
2.86111	3.16035	-0.0295388
2.86389	3.15996	-0.0295414
2.86667	3.15601	-0.0295416
2.86944	3.15929	-0.0295398
2.87222	3.15783	-0.0295395
2.875	3.15843	-0.0295399
2.87778	3.15969	-0.0295396
2.88056	3.15951	-0.0295414
2.88333	3.15895	-0.0295401
2.88611	3.15867	-0.0295402
2.88889	3.15687	-0.0295417
2.89167	3.15377	-0.0295404
2.89444	3.15796	-0.029541
2.89722	3.15775	-0.0295413
2.9	3.15496	-0.0295419
2.90278	3.15536	-0.0295412
2.90556	3.15798	-0.029542
2.90833	3.1582	-0.0295437
2.91111	3.15689	-0.0295429
2.91389	3.15585	-0.0295415
2.91667	3.15907	-0.0295413
2.91944	3.15454	-0.0295415
2.92222	3.15514	-0.0295399
2.925	3.15765	-0.0295411
2.92778	3.15975	-0.0295427
2.93056	3.1538	-0.0295425
2.93333	3.15481	-0.0295401
2.93611	3.15176	-0.0295401
2.93889	3.1538	-0.0295412
2.94167	3.15343	-0.0295413
2.94444	3.15555	-0.0295385
2.94722	3.15339	-0.029542
2.95	3.15317	-0.0295399
2.95278	3.1575	-0.0295398
2.95556	3.15497	-0.0295406
2.95833	3.15409	-0.0295391
2.96111	3.15311	-0.0295385
2.96389	3.15357	-0.0295399
2.96667	3.1551	-0.0295406
2.96944	3.15824	-0.0295382
2.97222	3.15102	-0.0295395
2.975	3.15094	-0.0295407
2.97778	3.14931	-0.0295409
2.98056	3.15405	-0.0295418
2.98333	3.15241	-0.0295402
2.98611	3.15251	-0.0295402
2.98889	3.15227	-0.0295388
2.99167	3.15443	-0.02954
2.99444	3.15041	-0.0295382
2.99722	3.15181	-0.0295397
3	3.15486	-0.0295385
3.00278	3.15154	-0.0295392
3.00556	3.14838	-0.0295387
3.00833	3.15035	-0.0295411
3.01111	3.14863	-0.0295406
3.01389	3.14886	-0.0295422
3.01667	3.15252	-0.0295432
3.01944	3.14529	-0.0295431
3.02222	3.1475	-0.0295424
3.025	3.1506	-0.0295426
3.02778	3.14532	-0.029541
3.03056	3.14784	-0.0295412
3.03333	3.1459	-0.0295421
3.03611	3.14915	-0.0295394
3.03889	3.14687	-0.0295397
3.04167	3.14927	-0.0295422
3.04444	3.15002	-0.0295407
3.04722	3.14596	-0.0295413
3.05	3.14473	-0.029541
3.05278	3.14448	-0.0295383
3.05556	3.14529	-0.0295398
3.05833	3.14889	-0.0295415
3.06111	3.14692	-0.0295404
3.06389	3.15151	-0.029542
3.06667	3.14182	-0.029539
3.06944	3.1486	-0.02954
3.07222	3.14568	-0.0295402
3.075	3.14562	-0.0295427
3.07778	3.14413	-0.0295412
3.08056	3.15062	-0.0295394
3.08333	3.14471	-0.0295394
3.08611	3.14919	-0.0295409
3.08889	3.14682	-0.0295421
3.09167	3.14428	-0.0295404
3.09444	3.14454	-0.0295411
3.09722	3.14259	-0.029542
3.1	3.14427	-0.0295412
3.10278	3.14687	-0.0295426
3.10556	3.14506	-0.0295412
3.10833	3.14466	-0.0295447
3.11111	3.1431	-0.0295431
3.11389	3.14369	-0.0295425
3.11667	3.14078	-0.0295406
3.11944	3.14169	-0.0295405
3.12222	3.14274	-0.0295408
3.125	3.14179	-0.0295398
3.12778	3.14112	-0.0295409
3.13056	3.14056	-0.029542
3.13333	3.14304	-0.0295391
3.13611	3.1401	-0.0295407
3.13889	3.14327	-0.0295404
3.14167	3.14089	-0.0295401
3.14444	3.14701	-0.0295407
3.14722	3.14331	-0.0295397
3.15	3.14213	-0.02954
3.15278	3.14666	-0.0295419
3.15556	3.14217	-0.0295401
3.15833	3.14021	-0.029543
3.16111	3.14473	-0.0295403
3.16389	3.14261	-0.0295428
3.16667	3.14175	-0.0295409
3.16944	3.13873	-0.0295415
3.17222	3.13763	-0.02954
3.175	3.14426	-0.0295412
3.17778	3.13667	-0.0295394
3.18056	3.14192	-0.0295398
3.18333	3.14068	-0.0295417
3.18611	3.13725	-0.0295414
3.18889	3.1395	-0.029543
3.19167	3.13761	-0.0295414
3.19444	3.14143	-0.0295419
3.19722	3.13936	-0.0295403
3.2	3.13632	-0.0295405
3.20278	3.13873	-0.0295398
3.20556	3.14114	-0.02954
3.20833	3.13565	-0.0295383
3.21111	3.14131	-0.0295382
3.21389	3.13656	-0.0295379
3.21667	3.13805	-0.0295385
3.21944	3.13595	-0.0295398
3.22222	3.13707	-0.0295401
3.225	3.13523	-0.0295408
3.22778	3.13902	-0.0295421
3.23056	3.13604	-0.0295398
3.23333	3.13548	-0.0295407
3.23611	3.13421	-0.0295411
3.23889	3.13479	-0.0295418
3.24167	3.13564	-0.0295419
3.24444	3.13972	-0.0295448
3.24722	3.1403	-0.0295438
3.25	3.13188	-0.0295435
3.25278	3.13521	-0.0295423
3.25556	3.13674	-0.0295419
3.25833	3.13555	-0.0295406
3.26111	3.13511	-0.029541
3.26389	3.13459	-0.0295424
3.26667	3.13543	-0.0295415
3.26944	3.13446	-0.0295414
3.27222	3.13358	-0.029541
3.275	3.13237	-0.0295401
3.27778	3.13599	-0.0295403
3.28056	3.13349	-0.0295409
3.28333	3.13609	-0.029539
3.28611	3.13437	-0.0295413
3.28889	3.13239	-0.0295419
3.29167	3.13118	-0.0295407
3.29444	3.13404	-0.0295406
3.29722	3.1316	-0.0295402
3.3	3.1303	-0.0295404
3.30278	3.13507	-0.0295408
3.30556	3.13053	-0.029542
3.30833	3.13054	-0.0295408
3.31111	3.1354	-0.0295429
3.31389	3.13095	-0.0295422
3.31667	3.13046	-0.0295432
3.31944	3.13416	-0.0295417
3.32222	3.13291	-0.0295398
3.325	3.13414	-0.0295429
3.32778	3.1306	-0.029541
3.33056	3.13111	-0.0295421
3.33333	3.12851	-0.0295425
3.33611	3.1306	-0.0295427
3.33889	3.13162	-0.0295415
3.34167	3.13086	-0.0295408
3.34444	3.1329	-0.0295414
3.34722	3.12806	-0.029542
3.35	3.12825	-0.0295429
3.35278	3.13387	-0.0295394
3.35556	3.12786	-0.0295417
3.35833	3.13014	-0.0295405
3.36111	3.12632	-0.0295405
3.36389	3.12872	-0.0295412
3.36667	3.12595	-0.0295433
3.36944	3.12873	-0.029542
3.37222	3.12563	-0.0295428
3.375	3.13052	-0.0295411
3.37778	3.12908	-0.02954
3.38056	3.13172	-0.0295436
3.38333	3.12685	-0.0295414
3.38611	3.12902	-0.0295419
3.38889	3.12749	-0.0295436
3.39167	3.12934	-0.0295419
3.39444	3.12855	-0.0295432
3.39722	3.12547	-0.0295416
3.4	3.12498	-0.0295455
3.40278	3.12716	-0.0295423
3.40556	3.13054	-0.0295423
3.40833	3.12633	-0.0295424
3.41111	3.12679	-0.0295415
3.41389	3.12446	-0.0295424
3.41667	3.12723	-0.0295415
3.41944	3.12806	-0.0295426
3.42222	3.12467	-0.0295454
3.425	3.12736	-0.0295426
3.42778	3.12374	-0.0295418
3.43056	3.12661	-0.0295413
3.43333	3.12511	-0.0295414
3.43611	3.12466	-0.0295419
3.43889	3.12723	-0.0295428
3.44167	3.12854	-0.0295426
3.44444	3.12687	-0.0295425
3.44722	3.12132	-0.0295425
3.45	3.12589	-0.0295436
3.45278	3.12257	-0.0295424
3.45556	3.12678	-0.0295444
3.45833	3.12233	-0.0295438
3.46111	3.12288	-0.0295421
3.46389	3.12393	-0.029543
3.46667	3.12694	-0.0295407
3.46944	3.12429	-0.0295407
3.47222	3.12598	-0.0295424
3.475	3.12012	-0.0295399
3.47778	3.11933	-0.0295412
3.48056	3.12304	-0.0295415
3.48333	3.12449	-0.0295404
3.48611	3.12179	-0.0295391
3.48889	3.11987	-0.0295422
3.49167	3.11959	-0.0295401
3.49444	3.12179	-0.0295423
3.49722	3.11992	-0.0295417
3.5	3.12046	-0.0295422
3.50278	3.12091	-0.0295442
3.50556	3.12206	-0.0295444
3.50833	3.11646	-0.0295396
3.51111	3.11546	-0.0295401
3.51389	3.12088	-0.0295406
3.51667	3.12066	-0.029541
3.51944	3.12012	-0.0295417
3.52222	3.11946	-0.0295386
3.525	3.11642	-0.0295409
3.52778	3.11852	-0.0295452
3.53056	3.11948	-0.0295394
3.53333	3.12416	-0.0295398
3.53611	3.11768	-0.0295401
3.53889	3.1183	-0.0295405
3.54167	3.11831	-0.0295416
3.54444	3.11989	-0.0295413
3.54722	3.11909	-0.0295421
3.55	3.11877	-0.0295409
3.55278	3.12167	-0.0295398
3.55556	3.11937	-0.0295409
3.55833	3.1159	-0.0295406
3.56111	3.11665	-0.0295421
3.56389	3.11823	-0.029543
3.56667	3.11667	-0.02954
3.56944	3.11644	-0.0295423
3.57222	3.11702	-0.0295411
3.575	3.11494	-0.0295424
3.57778	3.11392	-0.0295424
3.58056	3.11729	-0.0295413
3.58333	3.11857	-0.0295421
3.58611	3.11597	-0.0295428
3.58889	3.11419	-0.0295423
3.59167	3.11457	-0.0295425
3.59444	3.11852	-0.0295416
3.59722	3.11476	-0.0295408
3.6	3.11732	-0.0295411
3.60278	3.11353	-0.0295412
3.60556	3.11515	-0.0295408
3.60833	3.1159	-0.0295383
3.61111	3.1134	-0.0295394
3.61389	3.11223	-0.0295417
3.61667	3.11094	-0.0295415
3.61944	3.11659	-0.0295403
3.62222	3.11363	-0.0295416
3.625	3.11208	-0.0295398
3.62778	3.11668	-0.0295412
3.63056	3.11425	-0.029542
3.63333	3.11154	-0.0295398
3.63611	3.11295	-0.0295387
3.63889	3.11457	-0.0295432
3.64167	3.11507	-0.0295445
3.64444	3.10974	-0.0295428
3.64722	3.11804	-0.0295429
3.65	3.11389	-0.0295401
3.65278	3.11017	-0.029539
3.65556	3.11351	-0.0295418
3.65833	3.11006	-0.0295413
3.66111	3.11221	-0.0295395
3.66389	3.10894	-0.0295408
3.66667	3.11242	-0.0295418
3.66944	3.11288	-0.0295429
3.67222	3.11206	-0.0295391
3.675	3.11017	-0.0295423
3.67778	3.11271	-0.0295423
3.68056	3.11154	-0.0295429
3.68333	3.11402	-0.0295422
3.68611	3.111	-0.0295407
3.68889	3.11063	-0.0295406
3.69167	3.10732	-0.0295401
3.69444	3.10912	-0.0295428
3.69722	3.10751	-0.029541
3.7	3.1098	-0.0295412
3.70278	3.10883	-0.0295436
3.70556	3.10989	-0.0295435
3.70833	3.10954	-0.0295428
3.71111	3.10737	-0.0295422
3.71389	3.1073	-0.0295414
3.71667	3.10776	-0.0295406
3.71944	3.10667	-0.0295397
3.72222	3.10689	-0.0295421
3.725	3.1092	-0.0295415
3.72778	3.10704	-0.0295405
3.73056	3.10519	-0.0295403
3.73333	3.10633	-0.0295404
3.73611	3.10787	-0.0295411
3.73889	3.10378	-0.0295416
3.74167	3.10642	-0.0295399
3.74444	3.10837	-0.0295427
3.74722	3.1033	-0.0295408
3.75	3.10778	-0.0295415
3.75278	3.10521	-0.029542
3.75556	3.10751	-0.029541
3.75833	3.10918	-0.0295423
3.76111	3.10891	-0.029541
3.76389	3.1063	-0.0295433
3.76667	3.10621	-0.0295422
3.76944	3.10189	-0.0295419
3.77222	3.10584	-0.0295424
3.775	3.1022	-0.029541
3.77778	3.10584	-0.0295397
3.78056	3.1053	-0.0295416
3.78333	3.10411	-0.0295381
3.78611	3.10666	-0.0295396
3.78889	3.10583	-0.0295384
3.79167	3.10576	-0.029539
3.79444	3.10485	-0.0295389
3.79722	3.10475	-0.0295406
3.8	3.1026	-0.0295396
3.80278	3.10174	-0.0295378
3.80556	3.10247	-0.0295382
3.80833	3.10457	-0.0295371
3.81111	3.10542	-0.0295363
3.81389	3.10514	-0.0295401
3.81667	3.10244	-0.0295393
3.81944	3.10321	-0.0295406
3.82222	3.1033	-0.0295393
3.825	3.10065	-0.0295412
3.82778	3.10064	-0.0295438
3.83056	3.10054	-0.029542
3.83333	3.10217	-0.0295426
3.83611	3.10285	-0.0295412
3.83889	3.09801	-0.0295397
3.84167	3.10002	-0.0295383
3.84444	3.10072	-0.0295379
3.84722	3.10285	-0.0295373
3.85	3.10372	-0.029542
3.85278	3.09999	-0.029541
3.85556	3.09889	-0.0295387
3.85833	3.10254	-0.0295393
3.86111	3.10081	-0.0295421
3.86389	3.10032	-0.02954
3.86667	3.10123	-0.0295428
3.86944	3.09722	-0.02954
3.87222	3.10269	-0.0295385
3.875	3.10225	-0.0295405
3.87778	3.0995	-0.0295425
3.88056	3.09953	-0.0295428
3.88333	3.09798	-0.0295398
3.88611	3.09959	-0.0295408
3.88889	3.09845	-0.0295414
3.89167	3.09709	-0.0295403
3.89444	3.09875	-0.0295404
3.89722	3.0994	-0.02954
3.9	3.0998	-0.0295413
3.90278	3.09588	-0.0295405
3.90556	3.09787	-0.0295418
3.90833	3.09743	-0.0295399
3.91111	3.09425	-0.0295401
3.91389	3.09445	-0.0295426
3.91667	3.09752	-0.0295399
3.91944	3.09711	-0.0295408
3.92222	3.10032	-0.0295415
3.925	3.0925	-0.0295424
3.92778	3.09644	-0.0295411
3.93056	3.09753	-0.0295406
3.93333	3.09943	-0.029539
3.93611	3.09543	-0.029539
3.93889	3.09451	-0.0295398
3.94167	3.09701	-0.0295394
3.94444	3.094	-0.0295408
3.94722	3.09767	-0.029541
3.95	3.09213	-0.0295395
3.95278	3.09454	-0.0295395
3.95556	3.09586	-0.0295383
3.95833	3.09823	-0.0295385
3.96111	3.09549	-0.0295397
3.96389	3.09342	-0.0295406
3.96667	3.0929	-0.0295391
3.96944	3.09216	-0.0295395
3.97222	3.09068	-0.0295397
3.975	3.09963	-0.0295393
3.97778	3.09053	-0.0295376
3.98056	3.09125	-0.0295399
3.98333	3.09383	-0.0295398
3.98611	3.09105	-0.0295405
3.98889	3.09282	-0.0295414
3.99167	3.09717	-0.0295398
3.99444	3.09288	-0.0295384
3.99722	3.0923	-0.0295392
4	3.0918	-0.0295413
4.00278	3.09133	-0.0295405
4.00556	3.08976	-0.0295423
4.00833	3.09668	-0.029541
4.01111	3.09363	-0.0295398
4.01389	3.08955	-0.02954
4.01667	3.09287	-0.0295402
4.01944	3.09503	-0.0295417
4.02222	3.09286	-0.0295401
4.025	3.09323	-0.0295435
4.02778	3.09149	-0.0295399
4.03056	3.09125	-0.0295412
4.03333	3.0917	-0.029541
4.03611	3.09228	-0.0295424
4.03889	3.09316	-0.0295417
4.04167	3.09241	-0.0295428
4.04444	3.09048	-0.0295439
4.04722	3.09363	-0.0295417
4.05	3.09279	-0.0295406
4.05278	3.09498	-0.0295417
4.05556	3.09081	-0.0295427
4.05833	3.08726	-0.0295422
4.06111	3.08683	-0.0295416
4.06389	3.08361	-0.0295418
4.06667	3.08921	-0.0295413
4.06944	3.08499	-0.0295444
4.07222	3.09065	-0.029541
4.075	3.08877	-0.0295414
4.07778	3.08701	-0.0295398
4.08056	3.092	-0.0295426
4.08333	3.08637	-0.0295415
4.08611	3.0885	-0.0295425
4.08889	3.08954	-0.0295421
4.09167	3.0865	-0.0295421
4.09444	3.08757	-0.0295407
4.09722	3.08952	-0.0295417
4.1	3.08303	-0.0295422
4.10278	3.0886	-0.0295406
4.10556	3.08658	-0.0295401
4.10833	3.08976	-0.0295391
4.11111	3.08911	-0.0295391
4.11389	3.0895	-0.0295406
4.11667	3.08676	-0.0295392
4.11944	3.08807	-0.0295397
4.12222	3.08893	-0.029539
4.125	3.08624	-0.0295407
4.12778	3.08479	-0.0295375
4.13056	3.08531	-0.02954
4.13333	3.08439	-0.0295397
4.13611	3.08314	-0.0295401
4.13889	3.08527	-0.0295378
4.14167	3.0852	-0.0295398
4.14444	3.08738	-0.0295406
4.14722	3.08537	-0.02954
4.15	3.08436	-0.0295417
4.15278	3.08524	-0.0295426
4.15556	3.08383	-0.0295401
4.15833	3.08905	-0.0295428
4.16111	3.08258	-0.0295413
4.16389	3.08835	-0.0295414
4.16667	3.08222	-0.0295425
4.16944	3.08437	-0.0295422
4.17222	3.08726	-0.0295416
4.175	3.08372	-0.0295403
4.17778	3.08242	-0.0295427
4.18056	3.08616	-0.0295403
4.18333	3.08379	-0.0295414
4.18611	3.08442	-0.0295404
4.18889	3.08191	-0.0295425
4.19167	3.08089	-0.029542
4.19444	3.08556	-0.0295406
4.19722	3.08145	-0.0295408
4.2	3.07901	-0.0295412
4.20278	3.08104	-0.0295425
4.20556	3.08361	-0.0295401
4.20833	3.08559	-0.0295406
4.21111	3.07799	-0.0295403
4.21389	3.07891	-0.0295409
4.21667	3.083	-0.0295406
4.21944	3.08282	-0.0295395
4.22222	3.08158	-0.0295388
4.225	3.08288	-0.02954
4.22778	3.08214	-0.0295394
4.23056	3.08031	-0.0295418
4.23333	3.08423	-0.0295402
4.23611	3.08125	-0.0295393
4.23889	3.07872	-0.0295391
4.24167	3.07842	-0.0295398
4.24444	3.08042	-0.0295421
4.24722	3.07997	-0.0295386
4.25	3.07903	-0.029542
4.25278	3.08069	-0.0295403
4.25556	3.08211	-0.0295411
4.25833	3.08046	-0.0295372
4.26111	3.0819	-0.0295399
4.26389	3.07896	-0.0295404
4.26667	3.07956	-0.0295391
4.26944	3.0811	-0.0295403
4.27222	3.07852	-0.0295404
4.275	3.07438	-0.0295418
4.27778	3.07953	-0.029542
4.28056	3.07741	-0.0295402
4.28333	3.07651	-0.0295418
4.28611	3.07453	-0.0295416
4.28889	3.0764	-0.0295413
4.29167	3.07739	-0.0295413
4.29444	3.07549	-0.0295433
4.29722	3.07793	-0.0295403
4.3	3.07707	-0.0295419
4.30278	3.07398	-0.0295402
4.30556	3.07765	-0.0295393
4.30833	3.07616	-0.0295397
4.31111	3.07882	-0.0295396
4.31389	3.07516	-0.0295401
4.31667	3.07809	-0.0295378
4.31944	3.07661	-0.0295392
4.32222	3.07532	-0.0295391
4.325	3.07592	-0.0295387
4.32778	3.07226	-0.0295398
4.33056	3.07266	-0.0295373
4.33333	3.07385	-0.0295414
4.33611	3.07657	-0.0295425
4.33889	3.0791	-0.0295396
4.34167	3.07288	-0.029542
4.34444	3.07426	-0.0295427
4.34722	3.07251	-0.0295395
4.35	3.0764	-0.0295403
4.35278	3.0725	-0.0295408
4.35556	3.0729	-0.029541
4.35833	3.07577	-0.0295398
4.36111	3.07756	-0.0295385
4.36389	3.07404	-0.0295401
4.36667	3.07129	-0.0295423
4.36944	3.07348	-0.02954
4.37222	3.07351	-0.0295424
4.375	3.07304	-0.0295403
4.37778	3.0691	-0.0295408
4.38056	3.07202	-0.0295418
4.38333	3.07228	-0.0295409
4.38611	3.07129	-0.0295425
4.38889	3.07032	-0.0295415
4.39167	3.07081	-0.0295387
4.39444	3.07283	-0.0295406
4.39722	3.07149	-0.0295413
4.4	3.07032	-0.0295395
4.40278	3.071	-0.0295395
4.40556	3.07182	-0.0295411
4.40833	3.07536	-0.0295411
4.41111	3.07089	-0.0295406
4.41389	3.07322	-0.0295411
4.41667	3.07004	-0.0295414
4.41944	3.07123	-0.0295402
4.42222	3.06742	-0.0295411
4.425	3.07115	-0.0295386
4.42778	3.06968	-0.0295407
4.43056	3.0689	-0.0295424
4.43333	3.0684	-0.0295431
4.43611	3.07124	-0.029542
4.43889	3.07011	-0.0295413
4.44167	3.07054	-0.0295416
4.44444	3.06918	-0.0295406
4.44722	3.06892	-0.0295415
4.45	3.06553	-0.0295423
4.45278	3.07036	-0.0295404
4.45556	3.0651	-0.029542
4.45833	3.06914	-0.0295406
4.46111	3.07076	-0.0295404
4.46389	3.06993	-0.0295407
4.46667	3.06835	-0.0295406
4.46944	3.07063	-0.0295399
4.47222	3.06987	-0.0295381
4.475	3.06941	-0.02954
4.47778	3.06846	-0.0295407
4.48056	3.07197	-0.0295436
4.48333	3.06452	-0.0295411
4.48611	3.06315	-0.0295416
4.48889	3.06645	-0.0295433
4.49167	3.06594	-0.0295415
4.49444	3.06507	-0.0295428
4.49722	3.06987	-0.0295443
4.5	3.06775	-0.0295432
4.50278	3.0703	-0.0295406
4.50556	3.0662	-0.0295452
4.50833	3.06607	-0.0295439
4.51111	3.06542	-0.0295426
4.51389	3.06392	-0.0295414
4.51667	3.06845	-0.0295419
4.51944	3.06631	-0.0295418
4.52222	3.06513	-0.029542
4.525	3.0655	-0.0295423
4.52778	3.06769	-0.0295435
4.53056	3.06606	-0.0295424
4.53333	3.06791	-0.0295441
4.53611	3.06593	-0.0295425
4.53889	3.06473	-0.029542
4.54167	3.06346	-0.0295426
4.54444	3.0651	-0.0295432
4.54722	3.0613	-0.0295423
4.55	3.06226	-0.0295416
4.55278	3.06581	-0.0295404
4.55556	3.06694	-0.0295426
4.55833	3.06252	-0.0295423
4.56111	3.06405	-0.0295434
4.56389	3.06424	-0.0295436
4.56667	3.06448	-0.0295427
4.56944	3.06631	-0.029541
4.57222	3.06044	-0.0295441
4.575	3.06519	-0.0295413
4.57778	3.0621	-0.0295408
4.58056	3.06115	-0.0295412
4.58333	3.06708	-0.0295402
4.58611	3.06272	-0.0295422
4.58889	3.0605	-0.0295426
4.59167	3.06199	-0.0295427
4.59444	3.06263	-0.0295417
4.59722	3.06132	-0.0295438
4.6	3.06085	-0.0295416
4.60278	3.06465	-0.0295396
4.60556	3.06268	-0.0295417
4.60833	3.06182	-0.0295423
4.61111	3.06038	-0.0295427
4.61389	3.06401	-0.0295404
4.61667	3.06071	-0.0295429
4.61944	3.0583	-0.0295426
4.62222	3.062	-0.0295422
4.625	3.06033	-0.0295429
4.62778	3.06039	-0.0295432
4.63056	3.06084	-0.0295423
4.63333	3.05444	-0.0295428
4.63611	3.05612	-0.0295453
4.63889	3.06445	-0.0295418
4.64167	3.05934	-0.0295401
4.64444	3.06137	-0.0295413
4.64722	3.05763	-0.0295426
4.65	3.06403	-0.0295423
4.65278	3.05555	-0.0295424
4.65556	3.06008	-0.0295405
4.65833	3.06125	-0.0295398
4.66111	3.0587	-0.0295417
4.66389	3.05785	-0.0295406
4.66667	3.05505	-0.0295416
4.66944	3.05931	-0.0295423
4.67222	3.05638	-0.0295413
4.675	3.06008	-0.0295397
4.67778	3.05779	-0.0295413
4.68056	3.06232	-0.0295408
4.68333	3.06056	-0.0295406
4.68611	3.05712	-0.0295404
4.68889	3.05433	-0.0295413
4.69167	3.05726	-0.0295395
4.69444	3.05723	-0.0295408
4.69722	3.05871	-0.0295416
4.7	3.05274	-0.0295405
4.70278	3.05975	-0.0295396
4.70556	3.06037	-0.029542
4.70833	3.05654	-0.0295421
4.71111	3.05478	-0.0295407
4.71389	3.05566	-0.0295421
4.71667	3.05882	-0.0295411
4.71944	3.05271	-0.029542
4.72222	3.05542	-0.0295434
4.725	3.0543	-0.0295439
4.72778	3.05464	-0.0295427
4.73056	3.05487	-0.0295425
4.73333	3.05532	-0.0295416
4.73611	3.05861	-0.0295442
4.73889	3.05608	-0.0295421
4.74167	3.05368	-0.0295445
4.74444	3.05788	-0.0295424
4.74722	3.05324	-0.0295436
4.75	3.05329	-0.0295436
4.75278	3.05573	-0.029542
4.75556	3.05443	-0.0295411
4.75833	3.05295	-0.0295423
4.76111	3.05087	-0.0295403
4.76389	3.05306	-0.0295426
4.76667	3.05513	-0.0295411
4.76944	3.04734	-0.0295437
4.77222	3.04979	-0.0295421
4.775	3.05697	-0.0295412
4.77778	3.05241	-0.0295405
4.78056	3.055	-0.0295416
4.78333	3.04861	-0.0295406
4.78611	3.05153	-0.0295408
4.78889	3.05145	-0.0295411
4.79167	3.051	-0.0295413
4.79444	3.05322	-0.0295412
4.79722	3.05181	-0.0295447
4.8	3.05328	-0.0295434
4.80278	3.05151	-0.0295459
4.80556	3.04926	-0.0295435
4.80833	3.04856	-0.0295445
4.81111	3.05158	-0.0295424
4.81389	3.047	-0.0295448
4.81667	3.0508	-0.0295454
4.81944	3.05522	-0.0295467
4.82222	3.04984	-0.0295441
4.825	3.05034	-0.0295457
4.82778	3.05241	-0.0295457
4.83056	3.04949	-0.0295443
4.83333	3.05199	-0.0295456
4.83611	3.05305	-0.0295422
4.83889	3.04663	-0.0295443
4.84167	3.04747	-0.0295431
4.84444	3.05238	-0.0295445
4.84722	3.05304	-0.0295426
4.85	3.04691	-0.0295425
4.85278	3.04808	-0.0295427
4.85556	3.0479	-0.0295414
4.85833	3.05081	-0.0295455
4.86111	3.05093	-0.0295417
4.86389	3.04799	-0.0295409
4.86667	3.0517	-0.029542
4.86944	3.04887	-0.0295418
4.87222	3.04838	-0.0295454
4.875	3.04828	-0.0295417
4.87778	3.04751	-0.0295413
4.88056	3.05088	-0.0295423
4.88333	3.04558	-0.0295447
4.88611	3.04596	-0.0295426
4.88889	3.04808	-0.0295461
4.89167	3.04811	-0.0295448
4.89444	3.05097	-0.0295444
4.89722	3.04798	-0.0295439
4.9	3.05057	-0.029543
4.90278	3.04713	-0.0295423
4.90556	3.04827	-0.0295449
4.90833	3.04962	-0.029544
4.91111	3.04526	-0.0295419
4.91389	3.04994	-0.0295441
4.91667	3.04512	-0.0295396
4.91944	3.04793	-0.0295422
4.92222	3.04358	-0.0295423
4.925	3.04567	-0.0295421
4.92778	3.04633	-0.0295422
4.93056	3.04929	-0.0295418
4.93333	3.04768	-0.0295417
4.93611	3.04324	-0.0295413
4.93889	3.04465	-0.0295426
4.94167	3.04625	-0.0295431
4.94444	3.04591	-0.0295436
4.94722	3.04504	-0.0295451
4.95	3.04517	-0.0295451
4.95278	3.04548	-0.0295441
4.95556	3.04589	-0.0295434
4.95833	3.04379	-0.0295458
4.96111	3.04199	-0.0295432
4.96389	3.0454	-0.0295452
4.96667	3.0447	-0.029543
4.96944	3.04552	-0.0295457
4.97222	3.04579	-0.0295461
4.975	3.04483	-0.0295432
4.97778	3.03957	-0.0295447
4.98056	3.04245	-0.0295454
4.98333	3.04699	-0.0295448
4.98611	3.03841	-0.0295452
4.98889	3.04	-0.0295468
4.99167	3.04501	-0.0295445
4.99444	3.04542	-0.0295448
4.99722	3.03934	-0.029545
5	3.04219	-0.0295456
5.00278	3.04574	-0.0295453
5.00556	3.03865	-0.029545
5.00833	3.0421	-0.0295441
5.01111	3.03786	-0.029545
5.01389	3.04229	-0.0295441
5.01667	3.04655	-0.0295471
5.01944	3.03921	-0.0295442
5.02222	3.04306	-0.0295451
5.025	3.04218	-0.0295441
5.02778	3.04184	-0.0295435
5.03056	3.04288	-0.0295421
5.03333	3.04268	-0.0295421
5.03611	3.04037	-0.0295407
5.03889	3.03997	-0.0295412
5.04167	3.0401	-0.029541
5.04444	3.04032	-0.029542
5.04722	3.04381	-0.0295426
5.05	3.03751	-0.0295422
5.05278	3.04023	-0.0295407
5.05556	3.03783	-0.0295404
5.05833	3.04132	-0.029543
5.06111	3.04094	-0.0295425
5.06389	3.0428	-0.0295432
5.06667	3.04247	-0.0295414
5.06944	3.03864	-0.0295398
5.07222	3.04036	-0.0295397
5.075	3.03894	-0.0295396
5.07778	3.0427	-0.0295405
5.08056	3.03875	-0.0295418
5.08333	3.03822	-0.0295416
5.08611	3.03638	-0.0295417
5.08889	3.04211	-0.0295398
5.09167	3.03769	-0.0295423
5.09444	3.03826	-0.0295404
5.09722	3.03861	-0.0295433
5.1	3.0382	-0.0295425
5.10278	3.04028	-0.0295429
5.10556	3.04037	-0.029543
5.10833	3.03882	-0.0295444
5.11111	3.0387	-0.02954
5.11389	3.03771	-0.0295436
5.11667	3.03762	-0.0295417
5.11944	3.03418	-0.0295412
5.12222	3.03374	-0.0295403
5.125	3.04116	-0.0295426
5.12778	3.03872	-0.0295431
5.13056	3.03747	-0.0295414
5.13333	3.03511	-0.0295418
5.13611	3.04076	-0.0295452
5.13889	3.03721	-0.0295416
5.14167	3.03446	-0.0295426
5.14444	3.03602	-0.0295394
5.14722	3.0376	-0.0295394
5.15	3.03605	-0.0295427
5.15278	3.03659	-0.0295415
5.15556	3.03535	-0.0295399
5.15833	3.03831	-0.0295435
5.16111	3.03453	-0.0295431
5.16389	3.03509	-0.0295433
5.16667	3.03743	-0.0295421
5.16944	3.03445	-0.0295439
5.17222	3.03086	-0.0295439
5.175	3.03434	-0.0295436
5.17778	3.03494	-0.0295433
5.18056	3.03387	-0.029544
5.18333	3.03606	-0.0295426
5.18611	3.03669	-0.0295422
5.18889	3.03415	-0.0295432
5.19167	3.0338	-0.0295433
5.19444	3.03548	-0.0295437
5.19722	3.03311	-0.0295414
5.2	3.03505	-0.0295411
5.20278	3.03576	-0.0295404
5.20556	3.03736	-0.0295414
5.20833	3.03178	-0.0295408
5.21111	3.03379	-0.0295408
5.21389	3.02888	-0.0295413
5.21667	3.03568	-0.0295418
5.21944	3.03453	-0.0295405
5.22222	3.03076	-0.0295419
5.225	3.03637	-0.0295421
5.22778	3.03461	-0.0295414
5.23056	3.0294	-0.0295433
5.23333	3.03491	-0.0295437
5.23611	3.03178	-0.0295413
5.23889	3.03074	-0.0295421
5.24167	3.03256	-0.0295419
5.24444	3.03372	-0.0295427
5.24722	3.03272	-0.0295426
5.25	3.03289	-0.0295395
5.25278	3.02821	-0.0295408
5.25556	3.03074	-0.0295409
5.25833	3.02943	-0.0295418
5.26111	3.03002	-0.0295419
5.26389	3.03128	-0.0295438
5.26667	3.03351	-0.029545
5.26944	3.03108	-0.029542
5.27222	3.02898	-0.0295415
5.275	3.03336	-0.0295428
5.27778	3.0305	-0.0295407
5.28056	3.03748	-0.0295415
5.28333	3.02625	-0.029542
5.28611	3.03012	-0.0295428
5.28889	3.02602	-0.0295447
5.29167	3.03174	-0.0295427
5.29444	3.02502	-0.029544
5.29722	3.02815	-0.0295452
5.3	3.03212	-0.0295431
5.30278	3.02649	-0.0295442
5.30556	3.02663	-0.0295438
5.30833	3.02983	-0.0295426
5.31111	3.02766	-0.0295429
5.31389	3.02322	-0.0295415
5.31667	3.02437	-0.0295403
5.31944	3.03087	-0.029542
5.32222	3.02886	-0.0295417
5.325	3.02298	-0.0295406
5.32778	3.02787	-0.0295403
5.33056	3.02962	-0.029544
5.33333	3.02961	-0.0295436
5.33611	3.02594	-0.0295445
5.33889	3.02666	-0.0295405
5.34167	3.0293	-0.0295428
5.34444	3.02886	-0.0295438
5.34722	3.0287	-0.02954
5.35	3.02546	-0.0295435
5.35278	3.02714	-0.0295444
5.35556	3.0309	-0.0295431
5.35833	3.02767	-0.0295408
5.36111	3.02337	-0.0295418
5.36389	3.02755	-0.0295432
5.36667	3.02476	-0.0295448
5.36944	3.02207	-0.029542
5.37222	3.02708	-0.0295409
5.375	3.02669	-0.0295445
5.37778	3.02703	-0.029541
5.38056	3.02301	-0.0295421
5.38333	3.02654	-0.029543
5.38611	3.02789	-0.0295412
5.38889	3.02426	-0.0295404
5.39167	3.02755	-0.0295425
5.39444	3.02771	-0.0295428
5.39722	3.02341	-0.0295449
5.4	3.02569	-0.0295439
5.40278	3.0208	-0.029544
5.40556	3.02432	-0.0295429
5.40833	3.02366	-0.0295422
5.41111	3.02458	-0.0295408
5.41389	3.02167	-0.0295429
5.41667	3.01981	-0.0295423
5.41944	3.02315	-0.0295412
5.42222	3.02499	-0.0295429
5.425	3.02279	-0.0295441
5.42778	3.02372	-0.029542
5.43056	3.02247	-0.0295435
5.43333	3.02399	-0.0295444
5.43611	3.02424	-0.0295418
5.43889	3.01948	-0.0295421
5.44167	3.02545	-0.0295421
5.44444	3.02437	-0.0295422
5.44722	3.02229	-0.0295433
5.45	3.02183	-0.0295416
5.45278	3.02293	-0.0295421
5.45556	3.0269	-0.0295435
5.45833	3.02248	-0.0295424
5.46111	3.02469	-0.0295426
5.46389	3.02607	-0.0295442
5.46667	3.02333	-0.0295425
5.46944	3.02109	-0.0295402
5.47222	3.02088	-0.0295417
5.475	3.02451	-0.0295419
5.47778	3.02	-0.0295414
5.48056	3.02221	-0.0295416
5.48333	3.01833	-0.0295397
5.48611	3.01913	-0.0295421
5.48889	3.02116	-0.02954
5.49167	3.01979	-0.0295402
5.49444	3.01978	-0.0295407
5.49722	3.01925	-0.0295393
5.5	3.01705	-0.02954
5.50278	3.02205	-0.0295413
5.50556	3.01609	-0.0295389
5.50833	3.02016	-0.0295417
5.51111	3.02005	-0.0295418
5.51389	3.01534	-0.0295416
5.51667	3.02032	-0.0295426
5.51944	3.01939	-0.0295431
5.52222	3.02145	-0.0295436
5.525	3.01886	-0.0295452
5.52778	3.01538	-0.0295416
5.53056	3.01701	-0.0295428
5.53333	3.01764	-0.0295422
5.53611	3.0162	-0.0295406
5.53889	3.01662	-0.0295423
5.54167	3.02166	-0.0295409
5.54444	3.01543	-0.0295427
5.54722	3.01975	-0.0295417
[truncated: 10,189 more rows]

## Sheet: Figure 2b
Figure 2b	6Li concentration profiles that highlight the evolution of Li-ion concentration during cycling.
DoD 0%		DoD 100% (eq. SOC 0%)		SOC 100%
6Li atomic density (at/cm3)	Distance (mm)	6Li atomic density (at/cm3)	Distance (mm)	6Li atomic density (at/cm3)	Distance (mm)
1.7273e+21	0	1.2341e+21	0	1.2191e+21	0
1.7974e+21	0.00265	1.2613e+21	0.00265	1.2362e+21	0.00265
1.8538e+21	0.0053	1.2815e+21	0.0053	1.2694e+21	0.0053
1.9074e+21	0.00795	1.3045e+21	0.00795	1.3012e+21	0.00795
1.9493e+21	0.0106	1.3236e+21	0.0106	1.3389e+21	0.0106
2.0132e+21	0.01325	1.3661e+21	0.01325	1.3837e+21	0.01325
2.0771e+21	0.0159	1.4189e+21	0.0159	1.4332e+21	0.0159
2.1225e+21	0.01855	1.4596e+21	0.01855	1.4836e+21	0.01855
2.1728e+21	0.0212	1.5079e+21	0.0212	1.52e+21	0.0212
2.2389e+21	0.02385	1.5525e+21	0.02385	1.5665e+21	0.02385
2.3012e+21	0.0265	1.5837e+21	0.0265	1.636e+21	0.0265
2.3627e+21	0.02915	1.6202e+21	0.02915	1.7185e+21	0.02915
2.4318e+21	0.0318	1.6875e+21	0.0318	1.774e+21	0.0318
2.4793e+21	0.03445	1.7446e+21	0.03445	1.832e+21	0.03445
2.5639e+21	0.0371	1.7889e+21	0.0371	1.899e+21	0.0371
2.6648e+21	0.03975	1.8353e+21	0.03975	1.9665e+21	0.03975
2.7281e+21	0.0424	1.8913e+21	0.0424	2.012e+21	0.0424
2.8368e+21	0.04505	1.9417e+21	0.04505	2.0844e+21	0.04505
2.9098e+21	0.0477	1.9756e+21	0.0477	2.1849e+21	0.0477
3.0359e+21	0.05035	2.0158e+21	0.05035	2.2462e+21	0.05035
3.1763e+21	0.053	2.081e+21	0.053	2.3096e+21	0.053
3.3358e+21	0.05565	2.1744e+21	0.05565	2.3788e+21	0.05565
3.4623e+21	0.0583	2.2381e+21	0.0583	2.4329e+21	0.0583
3.6398e+21	0.06095	2.2896e+21	0.06095	2.5327e+21	0.06095
3.8493e+21	0.0636	2.3546e+21	0.0636	2.64e+21	0.0636
4.0695e+21	0.06625	2.4243e+21	0.06625	2.7433e+21	0.06625
4.3494e+21	0.0689	2.501e+21	0.0689	2.8602e+21	0.0689
4.6037e+21	0.07155	2.5845e+21	0.07155	2.9656e+21	0.07155
4.891e+21	0.0742	2.6769e+21	0.0742	3.1244e+21	0.0742
5.1971e+21	0.07685	2.8041e+21	0.07685	3.2804e+21	0.07685
5.4284e+21	0.0795	2.9236e+21	0.0795	3.4854e+21	0.0795
5.609e+21	0.08215	3.032e+21	0.08215	3.6724e+21	0.08215
5.8257e+21	0.0848	3.1694e+21	0.0848	3.9208e+21	0.0848
6.0343e+21	0.08745	3.3197e+21	0.08745	4.2006e+21	0.08745
6.2423e+21	0.0901	3.4419e+21	0.0901	4.4773e+21	0.0901
6.4091e+21	0.09275	3.6666e+21	0.09275	4.7636e+21	0.09275
6.5485e+21	0.0954	3.8923e+21	0.0954	5.0169e+21	0.0954
6.7351e+21	0.09805	4.1729e+21	0.09805	5.2622e+21	0.09805
6.8599e+21	0.1007	4.4072e+21	0.1007	5.5429e+21	0.1007
6.9544e+21	0.10335	4.7074e+21	0.10335	5.7952e+21	0.10335
7.0783e+21	0.106	5.0064e+21	0.106	6.0391e+21	0.106
7.19e+21	0.10865	5.282e+21	0.10865	6.2103e+21	0.10865
7.2685e+21	0.1113	5.5127e+21	0.1113	6.3534e+21	0.1113
7.3173e+21	0.11395	5.7387e+21	0.11395	6.5326e+21	0.11395
7.3601e+21	0.1166	5.9567e+21	0.1166	6.6898e+21	0.1166
7.4372e+21	0.11925	6.1817e+21	0.11925	6.8648e+21	0.11925
7.5103e+21	0.1219	6.3763e+21	0.1219	6.9628e+21	0.1219
7.5678e+21	0.12455	6.5361e+21	0.12455	7.0744e+21	0.12455
7.627e+21	0.1272	6.6572e+21	0.1272	7.2006e+21	0.1272
7.6715e+21	0.12985	6.787e+21	0.12985	7.317e+21	0.12985
7.6958e+21	0.1325	6.902e+21	0.1325	7.3953e+21	0.1325
7.6623e+21	0.13515	7.0237e+21	0.13515	7.4383e+21	0.13515
7.6707e+21	0.1378	7.1562e+21	0.1378	7.4747e+21	0.1378
7.6926e+21	0.14045	7.2572e+21	0.14045	7.5488e+21	0.14045
7.6806e+21	0.1431	7.3206e+21	0.1431	7.6352e+21	0.1431
7.6677e+21	0.14575	7.3626e+21	0.14575	7.6782e+21	0.14575
7.6954e+21	0.1484	7.4454e+21	0.1484	7.7059e+21	0.1484
7.6799e+21	0.15105	7.5059e+21	0.15105	7.7061e+21	0.15105
7.7152e+21	0.1537	7.5307e+21	0.1537	7.7147e+21	0.1537
7.7661e+21	0.15635	7.5346e+21	0.15635	7.7482e+21	0.15635
7.7103e+21	0.159	7.5236e+21	0.159	7.7317e+21	0.159
7.6938e+21	0.16165	7.5758e+21	0.16165	7.7149e+21	0.16165
7.7065e+21	0.1643	7.6028e+21	0.1643	7.6874e+21	0.1643
7.7256e+21	0.16695	7.6724e+21	0.16695	7.7076e+21	0.16695
7.7388e+21	0.1696	7.727e+21	0.1696	7.7566e+21	0.1696
7.7706e+21	0.17225	7.7361e+21	0.17225	7.8116e+21	0.17225
7.7719e+21	0.1749	7.7521e+21	0.1749	7.8114e+21	0.1749
7.7278e+21	0.17755	7.7235e+21	0.17755	7.8078e+21	0.17755
7.7059e+21	0.1802	7.7467e+21	0.1802	7.8013e+21	0.1802
7.7335e+21	0.18285	7.729e+21	0.18285	7.7541e+21	0.18285
7.7567e+21	0.1855	7.739e+21	0.1855	7.686e+21	0.1855
7.7289e+21	0.18815	7.7645e+21	0.18815	7.7222e+21	0.18815
7.7075e+21	0.1908	7.7422e+21	0.1908	7.7701e+21	0.1908
7.7324e+21	0.19345	7.7225e+21	0.19345	7.7083e+21	0.19345
7.754e+21	0.1961	7.7536e+21	0.1961	7.728e+21	0.1961
7.7396e+21	0.19875	7.7245e+21	0.19875	7.738e+21	0.19875
7.7242e+21	0.2014	7.7479e+21	0.2014	7.6953e+21	0.2014
7.6848e+21	0.20405	7.7921e+21	0.20405	7.6674e+21	0.20405
7.7096e+21	0.2067	7.7584e+21	0.2067	7.7179e+21	0.2067
7.7405e+21	0.20935	7.7314e+21	0.20935	7.7749e+21	0.20935
7.7431e+21	0.212	7.7554e+21	0.212	7.807e+21	0.212
7.7523e+21	0.21465	7.7618e+21	0.21465	7.8376e+21	0.21465
7.7249e+21	0.2173	7.7797e+21	0.2173	7.8273e+21	0.2173
7.6973e+21	0.21995	7.8099e+21	0.21995	7.7785e+21	0.21995
7.6966e+21	0.2226	7.7975e+21	0.2226	7.7627e+21	0.2226
7.7212e+21	0.22525	7.8411e+21	0.22525	7.7658e+21	0.22525
7.7081e+21	0.2279	7.8903e+21	0.2279	7.7685e+21	0.2279
7.7023e+21	0.23055	7.9016e+21	0.23055	7.7478e+21	0.23055
7.6857e+21	0.2332	7.9099e+21	0.2332	7.7042e+21	0.2332
7.7315e+21	0.23585	7.8647e+21	0.23585	7.6816e+21	0.23585
7.7605e+21	0.2385	7.7978e+21	0.2385	7.6709e+21	0.2385
7.78e+21	0.24115	7.7662e+21	0.24115	7.717e+21	0.24115
7.7498e+21	0.2438	7.7493e+21	0.2438	7.7495e+21	0.2438
7.6983e+21	0.24645	7.7704e+21	0.24645	7.7516e+21	0.24645
7.6461e+21	0.2491	7.8095e+21	0.2491	7.7869e+21	0.2491
7.6335e+21	0.25175	7.8497e+21	0.25175	7.7803e+21	0.25175
7.6558e+21	0.2544	7.8458e+21	0.2544	7.7755e+21	0.2544
7.6726e+21	0.25705	7.8359e+21	0.25705	7.7366e+21	0.25705
7.7218e+21	0.2597	7.8151e+21	0.2597	7.7321e+21	0.2597
7.7114e+21	0.26235	7.8056e+21	0.26235	7.734e+21	0.26235
7.7032e+21	0.265	7.8268e+21	0.265	7.7431e+21	0.265
7.6862e+21	0.26765	7.8629e+21	0.26765	7.7675e+21	0.26765
7.7159e+21	0.2703	7.8342e+21	0.2703	7.8095e+21	0.2703
7.7755e+21	0.27295	7.8117e+21	0.27295	7.8195e+21	0.27295
7.7617e+21	0.2756	7.819e+21	0.2756	7.8222e+21	0.2756
7.7024e+21	0.27825	7.8611e+21	0.27825	7.7465e+21	0.27825
7.7142e+21	0.2809	7.8794e+21	0.2809	7.7197e+21	0.2809
7.7607e+21	0.28355	7.8454e+21	0.28355	7.7381e+21	0.28355
7.7849e+21	0.2862	7.7968e+21	0.2862	7.7518e+21	0.2862
7.7433e+21	0.28885	7.8095e+21	0.28885	7.7743e+21	0.28885
7.7334e+21	0.2915	7.8187e+21	0.2915	7.7756e+21	0.2915
7.7037e+21	0.29415	7.7844e+21	0.29415	7.7607e+21	0.29415
7.6862e+21	0.2968	7.7465e+21	0.2968	7.7598e+21	0.2968
7.6601e+21	0.29945	7.7497e+21	0.29945	7.8128e+21	0.29945
7.6588e+21	0.3021	7.8316e+21	0.3021	7.8655e+21	0.3021
7.7302e+21	0.30475	7.8645e+21	0.30475	7.8186e+21	0.30475
7.7467e+21	0.3074	7.874e+21	0.3074	7.7811e+21	0.3074
7.7059e+21	0.31005	7.863e+21	0.31005	7.75e+21	0.31005
7.6777e+21	0.3127	7.8155e+21	0.3127	7.7563e+21	0.3127
7.6483e+21	0.31535	7.7611e+21	0.31535	7.7098e+21	0.31535
7.5941e+21	0.318	7.7318e+21	0.318	7.6626e+21	0.318
7.5901e+21	0.32065	7.6772e+21	0.32065	7.6396e+21	0.32065
7.557e+21	0.3233	7.559e+21	0.3233	7.616e+21	0.3233
7.5267e+21	0.32595	7.5027e+21	0.32595	7.5239e+21	0.32595
7.4902e+21	0.3286	7.479e+21	0.3286	7.435e+21	0.3286
7.4384e+21	0.33125	7.3868e+21	0.33125	7.3674e+21	0.33125
7.3347e+21	0.3339	7.2626e+21	0.3339	7.3491e+21	0.3339
7.2562e+21	0.33655	7.2125e+21	0.33655	7.3529e+21	0.33655
7.1962e+21	0.3392	7.0995e+21	0.3392	7.2876e+21	0.3392
7.1023e+21	0.34185	7.0057e+21	0.34185	7.1938e+21	0.34185
6.9949e+21	0.3445	6.8476e+21	0.3445	7.0691e+21	0.3445
6.8766e+21	0.34715	6.6943e+21	0.34715	6.8946e+21	0.34715
6.682e+21	0.3498	6.485e+21	0.3498	6.7306e+21	0.3498
6.429e+21	0.35245	6.2741e+21	0.35245	6.5356e+21	0.35245
6.1505e+21	0.3551	6.0284e+21	0.3551	6.3803e+21	0.3551
5.929e+21	0.35775	5.7012e+21	0.35775	6.2678e+21	0.35775
5.7211e+21	0.3604	5.4184e+21	0.3604	6.0217e+21	0.3604
5.4441e+21	0.36305	5.226e+21	0.36305	5.7936e+21	0.36305
5.2442e+21	0.3657	5.08e+21	0.3657	5.6146e+21	0.3657
5.0935e+21	0.36835	4.9604e+21	0.36835	5.4103e+21	0.36835
5.0059e+21	0.371	4.8477e+21	0.371	5.2974e+21	0.371
4.8951e+21	0.37365	4.8115e+21	0.37365	5.2238e+21	0.37365
4.8198e+21	0.3763	4.7578e+21	0.3763	5.1435e+21	0.3763
4.7387e+21	0.37895	4.725e+21	0.37895	5.0585e+21	0.37895
4.6742e+21	0.3816	4.6644e+21	0.3816	5.0039e+21	0.3816
4.6129e+21	0.38425	4.6338e+21	0.38425	4.9535e+21	0.38425
4.5983e+21	0.3869	4.611e+21	0.3869	4.9453e+21	0.3869
4.5547e+21	0.38955	4.5706e+21	0.38955	4.8961e+21	0.38955
4.4799e+21	0.3922	4.515e+21	0.3922	4.8301e+21	0.3922
4.4083e+21	0.39485	4.4868e+21	0.39485	4.7934e+21	0.39485
4.4088e+21	0.3975	4.4223e+21	0.3975	4.7722e+21	0.3975
4.3929e+21	0.40015	4.4007e+21	0.40015	4.7444e+21	0.40015
4.3486e+21	0.4028	4.398e+21	0.4028	4.698e+21	0.4028
4.2996e+21	0.40545	4.4039e+21	0.40545	4.6586e+21	0.40545
4.2744e+21	0.4081	4.3899e+21	0.4081	4.6605e+21	0.4081
4.2649e+21	0.41075	4.3949e+21	0.41075	4.649e+21	0.41075
4.2404e+21	0.4134	4.3788e+21	0.4134	4.6172e+21	0.4134
4.2349e+21	0.41605	4.3863e+21	0.41605	4.5941e+21	0.41605
4.2505e+21	0.4187	4.3788e+21	0.4187	4.5587e+21	0.4187
4.2273e+21	0.42135	4.3477e+21	0.42135	4.5068e+21	0.42135
4.214e+21	0.424	4.3237e+21	0.424	4.4721e+21	0.424
4.1877e+21	0.42665	4.3143e+21	0.42665	4.4767e+21	0.42665
4.1465e+21	0.4293	4.2896e+21	0.4293	4.4399e+21	0.4293
4.1237e+21	0.43195	4.2949e+21	0.43195	4.4097e+21	0.43195
4.0932e+21	0.4346	4.315e+21	0.4346	4.3935e+21	0.4346
4.0783e+21	0.43725	4.3066e+21	0.43725	4.4052e+21	0.43725
4.0653e+21	0.4399	4.2985e+21	0.4399	4.3933e+21	0.4399
4.0335e+21	0.44255	4.2948e+21	0.44255	4.363e+21	0.44255
4.0066e+21	0.4452	4.2966e+21	0.4452	4.332e+21	0.4452
3.9758e+21	0.44785	4.2715e+21	0.44785	4.3112e+21	0.44785
3.9547e+21	0.4505	4.2609e+21	0.4505	4.3048e+21	0.4505
3.9916e+21	0.45315	4.25e+21	0.45315	4.2917e+21	0.45315
4.0019e+21	0.4558	4.2277e+21	0.4558	4.3118e+21	0.4558
3.9881e+21	0.45845	4.2145e+21	0.45845	4.3224e+21	0.45845
3.9752e+21	0.4611	4.2104e+21	0.4611	4.3225e+21	0.4611
3.9644e+21	0.46375	4.1952e+21	0.46375	4.2929e+21	0.46375
3.9825e+21	0.4664	4.1924e+21	0.4664	4.2764e+21	0.4664
4.0105e+21	0.46905	4.2218e+21	0.46905	4.2636e+21	0.46905
3.9835e+21	0.4717	4.2282e+21	0.4717	4.2562e+21	0.4717
3.9379e+21	0.47435	4.2158e+21	0.47435	4.2581e+21	0.47435
3.9288e+21	0.477	4.2019e+21	0.477	4.2375e+21	0.477
3.947e+21	0.47965	4.1802e+21	0.47965	4.1925e+21	0.47965
3.936e+21	0.4823	4.139e+21	0.4823	4.1707e+21	0.4823
3.9202e+21	0.48495	4.118e+21	0.48495	4.1365e+21	0.48495
3.9183e+21	0.4876	4.1231e+21	0.4876	4.1201e+21	0.4876
3.8892e+21	0.49025	4.1302e+21	0.49025	4.102e+21	0.49025
3.8566e+21	0.4929	4.1324e+21	0.4929	4.1133e+21	0.4929
3.855e+21	0.49555	4.1052e+21	0.49555	4.1267e+21	0.49555
3.8411e+21	0.4982	4.0945e+21	0.4982	4.1106e+21	0.4982
3.8352e+21	0.50085	4.0864e+21	0.50085	4.0905e+21	0.50085
3.8279e+21	0.5035	4.0664e+21	0.5035	4.0896e+21	0.5035
3.8269e+21	0.50615	4.0781e+21	0.50615	4.083e+21	0.50615
3.8071e+21	0.5088	4.0771e+21	0.5088	4.0604e+21	0.5088
3.7702e+21	0.51145	4.0802e+21	0.51145	4.047e+21	0.51145
3.7833e+21	0.5141	4.0534e+21	0.5141	4.0639e+21	0.5141
3.7754e+21	0.51675	4.0425e+21	0.51675	4.0575e+21	0.51675
3.7621e+21	0.5194	4.0342e+21	0.5194	4.0676e+21	0.5194
3.763e+21	0.52205	4.0341e+21	0.52205	4.0582e+21	0.52205
3.7602e+21	0.5247	4.0227e+21	0.5247	4.0418e+21	0.5247
3.7531e+21	0.52735	4.0274e+21	0.52735	4.0371e+21	0.52735
3.784e+21	0.53	4.0367e+21	0.53	4.0334e+21	0.53
3.7798e+21	0.53265	4.019e+21	0.53265	4.0243e+21	0.53265
3.7728e+21	0.5353	4.0009e+21	0.5353	3.9967e+21	0.5353
3.7919e+21	0.53795	4.0041e+21	0.53795	3.9977e+21	0.53795
3.7882e+21	0.5406	4.015e+21	0.5406	3.9875e+21	0.5406
3.7706e+21	0.54325	4.0001e+21	0.54325	3.9589e+21	0.54325
3.7456e+21	0.5459	3.9797e+21	0.5459	3.9152e+21	0.5459
3.7159e+21	0.54855	3.9492e+21	0.54855	3.8696e+21	0.54855
3.7005e+21	0.5512	3.9174e+21	0.5512	3.8527e+21	0.5512
3.681e+21	0.55385	3.9147e+21	0.55385	3.8545e+21	0.55385
3.709e+21	0.5565	3.9087e+21	0.5565	3.8627e+21	0.5565
3.6706e+21	0.55915	3.896e+21	0.55915	3.8576e+21	0.55915
3.6478e+21	0.5618	3.889e+21	0.5618	3.8773e+21	0.5618
3.6362e+21	0.56445	3.8849e+21	0.56445	3.9009e+21	0.56445
3.6076e+21	0.5671	3.8759e+21	0.5671	3.8812e+21	0.5671
3.5815e+21	0.56975	3.8516e+21	0.56975	3.8753e+21	0.56975
3.5678e+21	0.5724	3.827e+21	0.5724	3.8628e+21	0.5724
3.5632e+21	0.57505	3.8312e+21	0.57505	3.8631e+21	0.57505
3.5466e+21	0.5777	3.8385e+21	0.5777	3.8462e+21	0.5777
3.5419e+21	0.58035	3.8136e+21	0.58035	3.8556e+21	0.58035
3.5111e+21	0.583	3.8039e+21	0.583	3.8592e+21	0.583
3.4951e+21	0.58565	3.832e+21	0.58565	3.8537e+21	0.58565
3.5021e+21	0.5883	3.8548e+21	0.5883	3.8535e+21	0.5883
3.4881e+21	0.59095	3.8399e+21	0.59095	3.8344e+21	0.59095
3.4982e+21	0.5936	3.8291e+21	0.5936	3.8007e+21	0.5936
3.5026e+21	0.59625	3.8276e+21	0.59625	3.7959e+21	0.59625
3.4803e+21	0.5989	3.8223e+21	0.5989	3.8107e+21	0.5989
3.4608e+21	0.60155	3.8003e+21	0.60155	3.8119e+21	0.60155
3.4425e+21	0.6042	3.7816e+21	0.6042	3.7944e+21	0.6042
3.425e+21	0.60685	3.7769e+21	0.60685	3.7795e+21	0.60685
3.4158e+21	0.6095	3.7618e+21	0.6095	3.7682e+21	0.6095
3.4385e+21	0.61215	3.7574e+21	0.61215	3.7725e+21	0.61215
3.4287e+21	0.6148	3.7835e+21	0.6148	3.7832e+21	0.6148
3.4049e+21	0.61745	3.7912e+21	0.61745	3.7539e+21	0.61745
3.386e+21	0.6201	3.8141e+21	0.6201	3.7297e+21	0.6201
3.3832e+21	0.62275	3.776e+21	0.62275	3.7126e+21	0.62275
3.3756e+21	0.6254	3.7551e+21	0.6254	3.7029e+21	0.6254
3.3789e+21	0.62805	3.7375e+21	0.62805	3.682e+21	0.62805
3.3586e+21	0.6307	3.7292e+21	0.6307	3.662e+21	0.6307
3.3526e+21	0.63335	3.7184e+21	0.63335	3.6413e+21	0.63335
3.3525e+21	0.636	3.6885e+21	0.636	3.6569e+21	0.636
3.3385e+21	0.63865	3.6977e+21	0.63865	3.6604e+21	0.63865
3.3175e+21	0.6413	3.6982e+21	0.6413	3.6504e+21	0.6413
3.31e+21	0.64395	3.6714e+21	0.64395	3.6426e+21	0.64395
3.291e+21	0.6466	3.6701e+21	0.6466	3.6606e+21	0.6466
3.2626e+21	0.64925	3.6796e+21	0.64925	3.6684e+21	0.64925
3.2455e+21	0.6519	3.6447e+21	0.6519	3.6478e+21	0.6519
3.2285e+21	0.65455	3.616e+21	0.65455	3.6477e+21	0.65455
3.2253e+21	0.6572	3.6141e+21	0.6572	3.6173e+21	0.6572
3.2323e+21	0.65985	3.6172e+21	0.65985	3.596e+21	0.65985
3.2348e+21	0.6625	3.6232e+21	0.6625	3.6024e+21	0.6625
3.2382e+21	0.66515	3.6335e+21	0.66515	3.6143e+21	0.66515
3.2376e+21	0.6678	3.6306e+21	0.6678	3.6171e+21	0.6678
3.2057e+21	0.67045	3.6077e+21	0.67045	3.6048e+21	0.67045
3.1957e+21	0.6731	3.5886e+21	0.6731	3.6073e+21	0.6731
3.1903e+21	0.67575	3.5915e+21	0.67575	3.604e+21	0.67575
3.1876e+21	0.6784	3.5941e+21	0.6784	3.574e+21	0.6784
3.188e+21	0.68105	3.5633e+21	0.68105	3.5651e+21	0.68105
3.1831e+21	0.6837	3.5446e+21	0.6837	3.5635e+21	0.6837
3.1675e+21	0.68635	3.5347e+21	0.68635	3.5562e+21	0.68635
3.1572e+21	0.689	3.5541e+21	0.689	3.544e+21	0.689
3.1554e+21	0.69165	3.539e+21	0.69165	3.5189e+21	0.69165
3.149e+21	0.6943	3.5162e+21	0.6943	3.4894e+21	0.6943
3.1334e+21	0.69695	3.5042e+21	0.69695	3.4921e+21	0.69695
3.1409e+21	0.6996	3.503e+21	0.6996	3.5071e+21	0.6996
3.1215e+21	0.70225	3.4948e+21	0.70225	3.508e+21	0.70225
3.0909e+21	0.7049	3.474e+21	0.7049	3.4772e+21	0.7049
3.0867e+21	0.70755	3.444e+21	0.70755	3.4659e+21	0.70755
3.0905e+21	0.7102	3.4409e+21	0.7102	3.457e+21	0.7102
3.0834e+21	0.71285	3.4251e+21	0.71285	3.4511e+21	0.71285
3.0766e+21	0.7155	3.4377e+21	0.7155	3.4328e+21	0.7155
3.0422e+21	0.71815	3.463e+21	0.71815	3.3998e+21	0.71815
3.0242e+21	0.7208	3.4466e+21	0.7208	3.3745e+21	0.7208
3.0162e+21	0.72345	3.4018e+21	0.72345	3.3973e+21	0.72345
3.0094e+21	0.7261	3.3886e+21	0.7261	3.4085e+21	0.7261
2.9797e+21	0.72875	3.389e+21	0.72875	3.4053e+21	0.72875
2.963e+21	0.7314	3.3988e+21	0.7314	3.395e+21	0.7314
2.9536e+21	0.73405	3.4031e+21	0.73405	3.4083e+21	0.73405
2.943e+21	0.7367	3.4035e+21	0.7367	3.3957e+21	0.7367
2.9297e+21	0.73935	3.3962e+21	0.73935	3.3676e+21	0.73935
2.9277e+21	0.742	3.3771e+21	0.742	3.3187e+21	0.742
2.9163e+21	0.74465	3.3151e+21	0.74465	3.3285e+21	0.74465
2.8843e+21	0.7473	3.2732e+21	0.7473	3.3306e+21	0.7473
2.8579e+21	0.74995	3.2682e+21	0.74995	3.2931e+21	0.74995
2.8247e+21	0.7526	3.2717e+21	0.7526	3.252e+21	0.7526
2.7996e+21	0.75525	3.2661e+21	0.75525	3.2416e+21	0.75525
2.7981e+21	0.7579	3.2401e+21	0.7579	3.2487e+21	0.7579
2.7847e+21	0.76055	3.2355e+21	0.76055	3.241e+21	0.76055
2.7764e+21	0.7632	3.2025e+21	0.7632	3.2409e+21	0.7632
2.7664e+21	0.76585	3.1677e+21	0.76585	3.2232e+21	0.76585
2.758e+21	0.7685	3.1654e+21	0.7685	3.2218e+21	0.7685
2.7503e+21	0.77115	3.179e+21	0.77115	3.2213e+21	0.77115
2.7411e+21	0.7738	3.1915e+21	0.7738	3.2405e+21	0.7738
2.7657e+21	0.77645	3.1891e+21	0.77645	3.2442e+21	0.77645
2.785e+21	0.7791	3.1902e+21	0.7791	3.2312e+21	0.7791
2.7741e+21	0.78175	3.1907e+21	0.78175	3.2472e+21	0.78175
2.7395e+21	0.7844	3.189e+21	0.7844	3.2498e+21	0.7844
2.734e+21	0.78705	3.1899e+21	0.78705	3.2517e+21	0.78705
2.7259e+21	0.7897	3.1786e+21	0.7897	3.2138e+21	0.7897
2.7077e+21	0.79235	3.1701e+21	0.79235	3.1993e+21	0.79235
2.6779e+21	0.795	3.1548e+21	0.795	3.1933e+21	0.795
2.6614e+21	0.79765	3.1592e+21	0.79765	3.1908e+21	0.79765
2.6417e+21	0.8003	3.1575e+21	0.8003	3.1915e+21	0.8003
2.6393e+21	0.80295	3.1621e+21	0.80295	3.1957e+21	0.80295
2.6285e+21	0.8056	3.163e+21	0.8056	3.1884e+21	0.8056
2.6195e+21	0.80825	3.1154e+21	0.80825	3.1736e+21	0.80825
2.6215e+21	0.8109	3.084e+21	0.8109	3.1873e+21	0.8109
2.6249e+21	0.81355	3.0943e+21	0.81355	3.1759e+21	0.81355
2.6098e+21	0.8162	3.1196e+21	0.8162	3.1609e+21	0.8162
2.6004e+21	0.81885	3.122e+21	0.81885	3.1616e+21	0.81885
2.6048e+21	0.8215	3.1081e+21	0.8215	3.1785e+21	0.8215
2.6078e+21	0.82415	3.1135e+21	0.82415	3.1788e+21	0.82415
2.6022e+21	0.8268	3.1093e+21	0.8268	3.1809e+21	0.8268
2.5706e+21	0.82945	3.0913e+21	0.82945	3.1701e+21	0.82945
2.5386e+21	0.8321	3.0597e+21	0.8321	3.1584e+21	0.8321
2.5466e+21	0.83475	3.0693e+21	0.83475	3.1594e+21	0.83475
2.5513e+21	0.8374	3.0858e+21	0.8374	3.1558e+21	0.8374
2.5416e+21	0.84005	3.0778e+21	0.84005	3.1492e+21	0.84005
2.5283e+21	0.8427	3.0757e+21	0.8427	3.1408e+21	0.8427
2.5405e+21	0.84535	3.0719e+21	0.84535	3.1238e+21	0.84535
2.5427e+21	0.848	3.0648e+21	0.848	3.1118e+21	0.848
2.5288e+21	0.85065	3.0445e+21	0.85065	3.0969e+21	0.85065
2.5173e+21	0.8533	3.0348e+21	0.8533	3.1066e+21	0.8533
2.4974e+21	0.85595	3.032e+21	0.85595	3.0956e+21	0.85595
2.4736e+21	0.8586	3.0163e+21	0.8586	3.0764e+21	0.8586
2.4635e+21	0.86125	3.0057e+21	0.86125	3.0543e+21	0.86125
2.4754e+21	0.8639	3.0089e+21	0.8639	3.0689e+21	0.8639
2.4652e+21	0.86655	3.015e+21	0.86655	3.0907e+21	0.86655
2.4583e+21	0.8692	3.0173e+21	0.8692	3.0959e+21	0.8692
2.4605e+21	0.87185	3.025e+21	0.87185	3.1009e+21	0.87185
2.4384e+21	0.8745	3.0341e+21	0.8745	3.0695e+21	0.8745
2.4375e+21	0.87715	3.0294e+21	0.87715	3.0189e+21	0.87715
2.4637e+21	0.8798	3.0045e+21	0.8798	3.0128e+21	0.8798
2.4441e+21	0.88245	2.9733e+21	0.88245	3.0388e+21	0.88245
2.4419e+21	0.8851	2.9404e+21	0.8851	3.0443e+21	0.8851
2.4295e+21	0.88775	2.9313e+21	0.88775	3.0356e+21	0.88775
2.4096e+21	0.8904	2.9341e+21	0.8904	3.0357e+21	0.8904
2.3905e+21	0.89305	2.9505e+21	0.89305	3.0244e+21	0.89305
2.3691e+21	0.8957	2.9411e+21	0.8957	3.0373e+21	0.8957
2.3599e+21	0.89835	2.9591e+21	0.89835	3.0464e+21	0.89835
2.3548e+21	0.901	2.9512e+21	0.901	3.0253e+21	0.901
2.3397e+21	0.90365	2.8955e+21	0.90365	3.013e+21	0.90365
2.3165e+21	0.9063	2.8685e+21	0.9063	3.0132e+21	0.9063
2.3121e+21	0.90895	2.8888e+21	0.90895	2.9865e+21	0.90895
2.3054e+21	0.9116	2.9094e+21	0.9116	2.9753e+21	0.9116
2.2975e+21	0.91425	2.9066e+21	0.91425	2.9732e+21	0.91425
2.2887e+21	0.9169	2.8753e+21	0.9169	2.9881e+21	0.9169
2.2528e+21	0.91955	2.8677e+21	0.91955	2.9869e+21	0.91955
2.2385e+21	0.9222	2.8605e+21	0.9222	2.9816e+21	0.9222
2.2488e+21	0.92485	2.8686e+21	0.92485	2.9681e+21	0.92485
2.2499e+21	0.9275	2.8812e+21	0.9275	2.9603e+21	0.9275
2.2345e+21	0.93015	2.8851e+21	0.93015	2.9306e+21	0.93015
2.2526e+21	0.9328	2.8727e+21	0.9328	2.9374e+21	0.9328
2.2639e+21	0.93545	2.8559e+21	0.93545	2.9641e+21	0.93545
2.254e+21	0.9381	2.8333e+21	0.9381	2.9595e+21	0.9381
2.24e+21	0.94075	2.816e+21	0.94075	2.9343e+21	0.94075
2.22e+21	0.9434	2.8132e+21	0.9434	2.9131e+21	0.9434
2.1909e+21	0.94605	2.7992e+21	0.94605	2.893e+21	0.94605
2.1738e+21	0.9487	2.7997e+21	0.9487	2.9049e+21	0.9487
2.1705e+21	0.95135	2.8019e+21	0.95135	2.9103e+21	0.95135
2.1709e+21	0.954	2.8077e+21	0.954	2.9123e+21	0.954
2.1744e+21	0.95665	2.7865e+21	0.95665	2.9009e+21	0.95665
2.1727e+21	0.9593	2.7665e+21	0.9593	2.8962e+21	0.9593
2.1816e+21	0.96195	2.7458e+21	0.96195	2.9066e+21	0.96195
2.1697e+21	0.9646	2.7459e+21	0.9646	2.8782e+21	0.9646
2.1557e+21	0.96725	2.7549e+21	0.96725	2.883e+21	0.96725
2.1579e+21	0.9699	2.7574e+21	0.9699	2.8587e+21	0.9699
2.1747e+21	0.97255	2.7657e+21	0.97255	2.8512e+21	0.97255
2.1806e+21	0.9752	2.7632e+21	0.9752	2.8367e+21	0.9752
2.1695e+21	0.97785	2.7713e+21	0.97785	2.8163e+21	0.97785
2.1738e+21	0.9805	2.7525e+21	0.9805	2.8094e+21	0.9805
2.1674e+21	0.98315	2.7448e+21	0.98315	2.8145e+21	0.98315
2.1693e+21	0.9858	2.7501e+21	0.9858	2.8513e+21	0.9858
2.1509e+21	0.98845	2.755e+21	0.98845	2.8811e+21	0.98845
2.1343e+21	0.9911	2.7799e+21	0.9911	2.8801e+21	0.9911
2.1023e+21	0.99375	2.7817e+21	0.99375	2.8696e+21	0.99375
2.1044e+21	0.9964	2.7707e+21	0.9964	2.8551e+21	0.9964
2.0977e+21	0.99905	2.7545e+21	0.99905	2.8509e+21	0.99905
2.0844e+21	1.0017	2.7269e+21	1.0017	2.8289e+21	1.0017
2.0754e+21	1.00435	2.7207e+21	1.00435	2.8113e+21	1.00435
2.0931e+21	1.007	2.7293e+21	1.007	2.8226e+21	1.007
2.0846e+21	1.00965	2.741e+21	1.00965	2.8502e+21	1.00965
2.0764e+21	1.0123	2.7555e+21	1.0123	2.8404e+21	1.0123
2.0781e+21	1.01495	2.7635e+21	1.01495	2.8213e+21	1.01495
2.0982e+21	1.0176	2.7566e+21	1.0176	2.8396e+21	1.0176
2.107e+21	1.02025	2.7503e+21	1.02025	2.8318e+21	1.02025
2.0984e+21	1.0229	2.7517e+21	1.0229	2.797e+21	1.0229
2.0857e+21	1.02555	2.7376e+21	1.02555	2.7951e+21	1.02555
2.0944e+21	1.0282	2.705e+21	1.0282	2.7949e+21	1.0282
2.0586e+21	1.03085	2.695e+21	1.03085	2.7872e+21	1.03085
2.0444e+21	1.0335	2.7045e+21	1.0335	2.7887e+21	1.0335
2.0395e+21	1.03615	2.7018e+21	1.03615	2.7926e+21	1.03615
2.0489e+21	1.0388	2.6929e+21	1.0388	2.798e+21	1.0388
2.0655e+21	1.04145	2.6643e+21	1.04145	2.7978e+21	1.04145
2.0805e+21	1.0441	2.669e+21	1.0441	2.7922e+21	1.0441
2.0814e+21	1.04675	2.6847e+21	1.04675	2.7676e+21	1.04675
2.0707e+21	1.0494	2.6722e+21	1.0494	2.7307e+21	1.0494
2.0713e+21	1.05205	2.6815e+21	1.05205	2.7604e+21	1.05205
2.0787e+21	1.0547	2.6779e+21	1.0547	2.777e+21	1.0547
2.0662e+21	1.05735	2.6778e+21	1.05735	2.7848e+21	1.05735
2.0514e+21	1.06	2.6919e+21	1.06	2.7674e+21	1.06
2.0426e+21	1.06265	2.7177e+21	1.06265	2.7556e+21	1.06265
2.0453e+21	1.0653	2.7175e+21	1.0653	2.7588e+21	1.0653
2.0683e+21	1.06795	2.7182e+21	1.06795	2.7548e+21	1.06795
2.0641e+21	1.0706	2.7183e+21	1.0706	2.743e+21	1.0706
2.0571e+21	1.07325	2.7238e+21	1.07325	2.7262e+21	1.07325
2.0398e+21	1.0759	2.716e+21	1.0759	2.7149e+21	1.0759
2.0265e+21	1.07855	2.6836e+21	1.07855	2.7207e+21	1.07855
2.0097e+21	1.0812	2.6685e+21	1.0812	2.7422e+21	1.0812
2.0148e+21	1.08385	2.6678e+21	1.08385	2.742e+21	1.08385
2.0279e+21	1.0865	2.6658e+21	1.0865	2.7315e+21	1.0865
2.032e+21	1.08915	2.6683e+21	1.08915	2.7087e+21	1.08915
2.0429e+21	1.0918	2.6498e+21	1.0918	2.7012e+21	1.0918
2.0474e+21	1.09445	2.6409e+21	1.09445	2.6943e+21	1.09445
2.001e+21	1.0971	2.6279e+21	1.0971	2.659e+21	1.0971
1.9667e+21	1.09975	2.5997e+21	1.09975	2.6614e+21	1.09975
1.9561e+21	1.1024	2.5781e+21	1.1024	2.6884e+21	1.1024
1.9655e+21	1.10505	2.5636e+21	1.10505	2.7044e+21	1.10505
1.9583e+21	1.1077	2.5522e+21	1.1077	2.6825e+21	1.1077
1.9718e+21	1.11035	2.5542e+21	1.11035	2.6823e+21	1.11035
2.0024e+21	1.113	2.5465e+21	1.113	2.6666e+21	1.113
1.9727e+21	1.11565	2.5315e+21	1.11565	2.6586e+21	1.11565
1.9691e+21	1.1183	2.5277e+21	1.1183	2.6302e+21	1.1183
1.9627e+21	1.12095	2.5297e+21	1.12095	2.6172e+21	1.12095
1.9354e+21	1.1236	2.5199e+21	1.1236	2.6035e+21	1.1236
1.9121e+21	1.12625	2.5118e+21	1.12625	2.5893e+21	1.12625
1.8762e+21	1.1289	2.5012e+21	1.1289	2.5781e+21	1.1289
1.8415e+21	1.13155	2.5044e+21	1.13155	2.5622e+21	1.13155
1.8434e+21	1.1342	2.5275e+21	1.1342	2.5485e+21	1.1342
1.8407e+21	1.13685	2.5695e+21	1.13685	2.5443e+21	1.13685
1.8499e+21	1.1395	2.5735e+21	1.1395	2.528e+21	1.1395
1.863e+21	1.14215	2.5738e+21	1.14215	2.5009e+21	1.14215
1.8458e+21	1.1448	2.5644e+21	1.1448	2.4847e+21	1.1448
1.8053e+21	1.14745	2.5458e+21	1.14745	2.4763e+21	1.14745
1.7721e+21	1.1501	2.5607e+21	1.1501	2.4285e+21	1.1501
1.7511e+21	1.15275	2.5601e+21	1.15275	2.3955e+21	1.15275
1.741e+21	1.1554	2.5601e+21	1.1554	2.3812e+21	1.1554
1.7511e+21	1.15805	2.5397e+21	1.15805	2.3666e+21	1.15805
1.7634e+21	1.1607	2.5135e+21	1.1607	2.3364e+21	1.1607
1.7329e+21	1.16335	2.5266e+21	1.16335	2.2945e+21	1.16335
1.6969e+21	1.166	2.5009e+21	1.166	2.2772e+21	1.166
1.6703e+21	1.16865	2.465e+21	1.16865	2.2368e+21	1.16865
1.6436e+21	1.1713	2.4714e+21	1.1713	2.1934e+21	1.1713
1.6267e+21	1.17395	2.4651e+21	1.17395	2.1966e+21	1.17395
1.629e+21	1.1766	2.4526e+21	1.1766	2.1741e+21	1.1766
1.6018e+21	1.17925	2.4349e+21	1.17925	2.1206e+21	1.17925
1.5871e+21	1.1819	2.4265e+21	1.1819	2.0889e+21	1.1819
1.5775e+21	1.18455	2.4264e+21	1.18455	2.0955e+21	1.18455
1.5605e+21	1.1872	2.446e+21	1.1872	2.0961e+21	1.1872
1.5405e+21	1.18985	2.4398e+21	1.18985	2.0813e+21	1.18985
1.5008e+21	1.1925	2.4126e+21	1.1925	2.0558e+21	1.1925
1.4764e+21	1.19515	2.3755e+21	1.19515	2.0228e+21	1.19515
1.4585e+21	1.1978	2.377e+21	1.1978	1.9913e+21	1.1978
1.4576e+21	1.20045	2.3722e+21	1.20045	1.9704e+21	1.20045
1.4459e+21	1.2031	2.3521e+21	1.2031	1.9557e+21	1.2031
1.417e+21	1.20575	2.3564e+21	1.20575	1.9183e+21	1.20575
1.4003e+21	1.2084	2.331e+21	1.2084	1.8831e+21	1.2084
1.3911e+21	1.21105	2.3274e+21	1.21105	1.8531e+21	1.21105
1.3844e+21	1.2137	2.3154e+21	1.2137	1.834e+21	1.2137
1.3733e+21	1.21635	2.2846e+21	1.21635	1.8104e+21	1.21635
1.3601e+21	1.219	2.2674e+21	1.219	1.7758e+21	1.219
1.3537e+21	1.22165	2.2492e+21	1.22165	1.7791e+21	1.22165
1.3433e+21	1.2243	2.2384e+21	1.2243	1.7705e+21	1.2243
1.3294e+21	1.22695	2.2469e+21	1.22695	1.7464e+21	1.22695
1.3093e+21	1.2296	2.233e+21	1.2296	1.7338e+21	1.2296
1.3004e+21	1.23225	2.2239e+21	1.23225	1.7342e+21	1.23225
1.2948e+21	1.2349	2.2252e+21	1.2349	1.6945e+21	1.2349
1.2836e+21	1.23755	2.2245e+21	1.23755	1.6715e+21	1.23755
1.2768e+21	1.2402	2.2214e+21	1.2402	1.6563e+21	1.2402
1.2645e+21	1.24285	2.2273e+21	1.24285	1.6426e+21	1.24285
1.2352e+21	1.2455	2.2159e+21	1.2455	1.6361e+21	1.2455
1.2066e+21	1.24815	2.213e+21	1.24815	1.6143e+21	1.24815
1.2025e+21	1.2508	2.2156e+21	1.2508	1.6012e+21	1.2508
1.2174e+21	1.25345	2.2026e+21	1.25345	1.5782e+21	1.25345
1.2293e+21	1.2561	2.1916e+21	1.2561	1.5642e+21	1.2561
1.2249e+21	1.25875	2.2015e+21	1.25875	1.5649e+21	1.25875
1.2098e+21	1.2614	2.2167e+21	1.2614	1.5615e+21	1.2614
1.206e+21	1.26405	2.2206e+21	1.26405	1.5484e+21	1.26405
1.1984e+21	1.2667	2.2065e+21	1.2667	1.5441e+21	1.2667
1.1992e+21	1.26935	2.2082e+21	1.26935	1.5514e+21	1.26935
1.199e+21	1.272	2.1922e+21	1.272	1.538e+21	1.272
1.2112e+21	1.27465	2.1547e+21	1.27465	1.5174e+21	1.27465
1.2132e+21	1.2773	2.1305e+21	1.2773	1.5102e+21	1.2773
1.1926e+21	1.27995	2.1181e+21	1.27995	1.5015e+21	1.27995
1.1751e+21	1.2826	2.11e+21	1.2826	1.4907e+21	1.2826
1.1736e+21	1.28525	2.1169e+21	1.28525	1.4833e+21	1.28525
1.1713e+21	1.2879	2.0991e+21	1.2879	1.4731e+21	1.2879
1.1639e+21	1.29055	2.1071e+21	1.29055	1.4501e+21	1.29055
1.1536e+21	1.2932	2.0855e+21	1.2932	1.4462e+21	1.2932
1.1502e+21	1.29585	2.0819e+21	1.29585	1.4544e+21	1.29585
1.159e+21	1.2985	2.077e+21	1.2985	1.4397e+21	1.2985
1.154e+21	1.30115	2.0728e+21	1.30115	1.4453e+21	1.30115
1.128e+21	1.3038	2.074e+21	1.3038	1.4552e+21	1.3038
1.1224e+21	1.30645	2.0667e+21	1.30645	1.4658e+21	1.30645
1.122e+21	1.3091	2.0724e+21	1.3091	1.4635e+21	1.3091
1.1125e+21	1.31175	2.0666e+21	1.31175	1.4449e+21	1.31175
1.1238e+21	1.3144	2.0548e+21	1.3144	1.4389e+21	1.3144
1.131e+21	1.31705	2.0374e+21	1.31705	1.4289e+21	1.31705
1.1342e+21	1.3197	2.039e+21	1.3197	1.4046e+21	1.3197
1.1152e+21	1.32235	2.0379e+21	1.32235	1.3799e+21	1.32235
1.0949e+21	1.325	2.0177e+21	1.325	1.3658e+21	1.325
1.0854e+21	1.32765	2.0023e+21	1.32765	1.3604e+21	1.32765
1.0921e+21	1.3303	2.0073e+21	1.3303	1.3908e+21	1.3303
1.0874e+21	1.33295	2.0004e+21	1.33295	1.4048e+21	1.33295
1.0892e+21	1.3356	2.0016e+21	1.3356	1.3749e+21	1.3356
1.1e+21	1.33825	1.9869e+21	1.33825	1.3611e+21	1.33825
1.1139e+21	1.3409	1.9686e+21	1.3409	1.3631e+21	1.3409
1.0942e+21	1.34355	1.9595e+21	1.34355	1.3494e+21	1.34355
1.0686e+21	1.3462	1.9516e+21	1.3462	1.3222e+21	1.3462
1.0603e+21	1.34885	1.9519e+21	1.34885	1.3171e+21	1.34885
1.0417e+21	1.3515	1.9608e+21	1.3515	1.3077e+21	1.3515
1.0203e+21	1.35415	1.9431e+21	1.35415	1.2899e+21	1.35415
1.0052e+21	1.3568	1.9112e+21	1.3568	1.2826e+21	1.3568
1.0003e+21	1.35945	1.8842e+21	1.35945	1.2667e+21	1.35945
1.0021e+21	1.3621	1.8604e+21	1.3621	1.2438e+21	1.3621
9.8987e+20	1.36475	1.85e+21	1.36475	1.2073e+21	1.36475
9.7737e+20	1.3674	1.8416e+21	1.3674	1.1834e+21	1.3674
9.5661e+20	1.37005	1.792e+21	1.37005	1.1786e+21	1.37005
9.206e+20	1.3727	1.7508e+21	1.3727	1.1632e+21	1.3727
9.0167e+20	1.37535	1.7082e+21	1.37535	1.1414e+21	1.37535
8.8513e+20	1.378	1.6635e+21	1.378	1.129e+21	1.378
8.4704e+20	1.38065	1.6283e+21	1.38065	1.1124e+21	1.38065
8.1502e+20	1.3833	1.584e+21	1.3833	1.0655e+21	1.3833
7.8481e+20	1.38595	1.5363e+21	1.38595	1.0227e+21	1.38595
7.3607e+20	1.3886	1.483e+21	1.3886	9.4701e+20	1.3886
6.8504e+20	1.39125	1.399e+21	1.39125	8.8511e+20	1.39125
6.0711e+20	1.3939	1.3339e+21	1.3939	8.1603e+20	1.3939
5.3074e+20	1.39655	1.2552e+21	1.39655	7.4843e+20	1.39655
4.8573e+20	1.3992	1.1654e+21	1.3992	6.9828e+20	1.3992
4.4455e+20	1.40185	1.1264e+21	1.40185	6.7323e+20	1.40185
4.3979e+20	1.4045	1.1045e+21	1.4045	6.6503e+20	1.4045
4.5898e+20	1.40715	1.0802e+21	1.40715	6.5957e+20	1.40715
5.203e+20	1.4098	1.065e+21	1.4098	6.5928e+20	1.4098
5.4905e+20	1.41245	1.0437e+21	1.41245	6.8955e+20	1.41245
5.7702e+20	1.4151	9.9056e+20	1.4151	6.9861e+20	1.4151
5.7036e+20	1.41775	9.3459e+20	1.41775	6.6804e+20	1.41775
5.2965e+20	1.4204	8.269e+20	1.4204	5.9684e+20	1.4204
4.5556e+20	1.42305	7.2166e+20	1.42305	4.7047e+20	1.42305
3.6669e+20	1.4257	6.0404e+20	1.4257	3.9695e+20	1.4257
2.6808e+20	1.42835	5.1062e+20	1.42835	3.2185e+20	1.42835
1.9074e+20	1.431	4.2353e+20	1.431	2.4885e+20	1.431
1.3151e+20	1.43365	3.3192e+20	1.43365	1.6514e+20	1.43365
6.7345e+19	1.4363	2.6585e+20	1.4363	1.0158e+20	1.4363
1.9682e+19	1.43895	2.0361e+20	1.43895	7.2688e+19	1.43895
-6.3156e+18	1.4416	1.3943e+20	1.4416	1.9045e+19	1.4416
-4.5399e+19	1.44425	8.5633e+19	1.44425	-3.8092e+19	1.44425
-7.503e+19	1.4469	4.3654e+19	1.4469	-7.5755e+19	1.4469
-1.1464e+20	1.44955	1.0991e+18	1.44955	-1.2853e+20	1.44955
-1.6034e+20	1.4522	-2.7604e+19	1.4522	-1.5774e+20	1.4522
-1.9418e+20	1.45485	-6.4693e+19	1.45485	-1.8291e+20	1.45485
-2.1595e+20	1.4575	-9.9235e+19	1.4575	-2.3163e+20	1.4575
-2.3668e+20	1.46015	-1.2304e+20	1.46015	-2.6357e+20	1.46015
-2.5275e+20	1.4628	-1.4971e+20	1.4628	-2.7638e+20	1.4628
-2.6861e+20	1.46545	-1.8161e+20	1.46545	-2.951e+20	1.46545
-2.9196e+20	1.4681	-2.2074e+20	1.4681	-3.0505e+20	1.4681
-3.2211e+20	1.47075	-2.5287e+20	1.47075	-3.248e+20	1.47075
-3.3408e+20	1.4734	-2.8485e+20	1.4734	-3.4351e+20	1.4734
-3.395e+20	1.47605	-3.0383e+20	1.47605	-3.7163e+20	1.47605
-3.4371e+20	1.4787	-3.3038e+20	1.4787	-3.8464e+20	1.4787
-3.6755e+20	1.48135	-3.5207e+20	1.48135	-3.937e+20	1.48135
-3.9523e+20	1.484	-3.6685e+20	1.484	-4.041e+20	1.484
-4.1893e+20	1.48665	-3.8167e+20	1.48665	-4.2046e+20	1.48665
-4.1865e+20	1.4893	-3.8997e+20	1.4893	-4.338e+20	1.4893
-4.2176e+20	1.49195	-3.9144e+20	1.49195	-4.5424e+20	1.49195
-4.2503e+20	1.4946	-4.2374e+20	1.4946	-4.7967e+20	1.4946
-4.3487e+20	1.49725	-4.6129e+20	1.49725	-4.9537e+20	1.49725
-4.4778e+20	1.4999	-4.6487e+20	1.4999	-5.085e+20	1.4999
-4.563e+20	1.50255	-4.827e+20	1.50255	-5.1942e+20	1.50255
-4.6936e+20	1.5052	-4.9849e+20	1.5052	-5.1423e+20	1.5052
-4.6793e+20	1.50785	-5.0079e+20	1.50785	-5.2979e+20	1.50785
-4.9408e+20	1.5105	-5.1764e+20	1.5105	-5.4705e+20	1.5105
-5.0075e+20	1.51315	-5.2512e+20	1.51315	-5.4661e+20	1.51315
-4.8414e+20	1.5158	-5.2721e+20	1.5158	-5.4987e+20	1.5158
-4.9566e+20	1.51845	-5.257e+20	1.51845	-5.4648e+20	1.51845
-5.0715e+20	1.5211	-5.3029e+20	1.5211	-5.5304e+20	1.5211
-5.1012e+20	1.52375	-5.4576e+20	1.52375	-5.6223e+20	1.52375
-5.1141e+20	1.5264	-5.4861e+20	1.5264	-5.6131e+20	1.5264
-5.1483e+20	1.52905	-5.4896e+20	1.52905	-5.613e+20	1.52905

## Sheet: Figure 4a
Figure 4a	Evolution of 6Li content during cycling at the center of the cell (separator discharge)
	6Li atomic density (at/cm3) at different DoD (%)
Distance (mm)	0	10	20	30	40	50	60	70	80	90	92.5	95	97.5	100
0	1.7273e+21	1.6479e+21	1.6001e+21	1.5683e+21	1.5154e+21	1.5202e+21	1.4855e+21	1.4701e+21	1.3926e+21	1.3679e+21	1.3523e+21	1.3072e+21	1.2908e+21	1.2341e+21
0.00265	1.7974e+21	1.6797e+21	1.6468e+21	1.606e+21	1.5543e+21	1.5521e+21	1.5198e+21	1.526e+21	1.4272e+21	1.3862e+21	1.3769e+21	1.3409e+21	1.317e+21	1.2613e+21
0.0053	1.8538e+21	1.7193e+21	1.7025e+21	1.6549e+21	1.6108e+21	1.5865e+21	1.5717e+21	1.55e+21	1.4926e+21	1.4314e+21	1.4171e+21	1.3893e+21	1.3341e+21	1.2815e+21
0.00795	1.9074e+21	1.7893e+21	1.7472e+21	1.6753e+21	1.6705e+21	1.6349e+21	1.6051e+21	1.575e+21	1.5282e+21	1.4679e+21	1.45e+21	1.4215e+21	1.3711e+21	1.3045e+21
0.0106	1.9493e+21	1.8268e+21	1.8041e+21	1.7121e+21	1.7207e+21	1.6861e+21	1.6448e+21	1.6077e+21	1.5555e+21	1.5116e+21	1.5005e+21	1.4451e+21	1.4005e+21	1.3236e+21
0.01325	2.0132e+21	1.8776e+21	1.8584e+21	1.7621e+21	1.7614e+21	1.7461e+21	1.6929e+21	1.6499e+21	1.6063e+21	1.542e+21	1.5364e+21	1.5004e+21	1.4311e+21	1.3661e+21
0.0159	2.0771e+21	1.9423e+21	1.9177e+21	1.8276e+21	1.7999e+21	1.795e+21	1.7457e+21	1.6826e+21	1.6815e+21	1.6069e+21	1.5743e+21	1.5305e+21	1.4649e+21	1.4189e+21
0.01855	2.1225e+21	1.9826e+21	1.9905e+21	1.9061e+21	1.8573e+21	1.8449e+21	1.7926e+21	1.7503e+21	1.7186e+21	1.6568e+21	1.6073e+21	1.5607e+21	1.5111e+21	1.4596e+21
0.0212	2.1728e+21	2.0372e+21	2.0355e+21	1.9598e+21	1.9153e+21	1.8847e+21	1.8518e+21	1.8269e+21	1.7657e+21	1.7186e+21	1.6285e+21	1.6144e+21	1.5508e+21	1.5079e+21
0.02385	2.2389e+21	2.1122e+21	2.0891e+21	2.0028e+21	1.9708e+21	1.9336e+21	1.9112e+21	1.8736e+21	1.8166e+21	1.7594e+21	1.6704e+21	1.657e+21	1.5756e+21	1.5525e+21
0.0265	2.3012e+21	2.1884e+21	2.1466e+21	2.0774e+21	2.0332e+21	1.9811e+21	1.9568e+21	1.932e+21	1.8519e+21	1.7845e+21	1.743e+21	1.7032e+21	1.6128e+21	1.5837e+21
0.02915	2.3627e+21	2.2378e+21	2.2104e+21	2.1411e+21	2.0899e+21	2.0454e+21	2.0066e+21	1.9849e+21	1.8976e+21	1.8348e+21	1.8022e+21	1.7362e+21	1.6448e+21	1.6202e+21
0.0318	2.4318e+21	2.3118e+21	2.2685e+21	2.1942e+21	2.1678e+21	2.1289e+21	2.0525e+21	2.0677e+21	1.9717e+21	1.871e+21	1.852e+21	1.7925e+21	1.6883e+21	1.6875e+21
0.03445	2.4793e+21	2.3945e+21	2.3377e+21	2.2778e+21	2.2525e+21	2.2106e+21	2.1082e+21	2.1232e+21	2.0527e+21	1.93e+21	1.8888e+21	1.8631e+21	1.7388e+21	1.7446e+21
0.0371	2.5639e+21	2.4912e+21	2.3923e+21	2.3489e+21	2.3269e+21	2.2861e+21	2.1801e+21	2.1918e+21	2.1251e+21	1.9839e+21	1.9592e+21	1.9149e+21	1.7918e+21	1.7889e+21
0.03975	2.6648e+21	2.5655e+21	2.4613e+21	2.4137e+21	2.3991e+21	2.3301e+21	2.2572e+21	2.2407e+21	2.1958e+21	2.0406e+21	2.021e+21	1.9489e+21	1.8623e+21	1.8353e+21
0.0424	2.7281e+21	2.6221e+21	2.527e+21	2.5007e+21	2.455e+21	2.412e+21	2.3501e+21	2.2892e+21	2.2516e+21	2.1093e+21	2.0696e+21	2.0147e+21	1.932e+21	1.8913e+21
0.04505	2.8368e+21	2.7236e+21	2.6139e+21	2.5779e+21	2.4927e+21	2.4749e+21	2.4146e+21	2.3381e+21	2.2853e+21	2.1833e+21	2.1086e+21	2.0646e+21	1.9829e+21	1.9417e+21
0.0477	2.9098e+21	2.8297e+21	2.6845e+21	2.6335e+21	2.5575e+21	2.5427e+21	2.4881e+21	2.4056e+21	2.3746e+21	2.2584e+21	2.1791e+21	2.132e+21	2.0303e+21	1.9756e+21
0.05035	3.0359e+21	2.9381e+21	2.747e+21	2.6873e+21	2.6375e+21	2.6207e+21	2.5488e+21	2.4804e+21	2.4429e+21	2.3273e+21	2.2312e+21	2.1934e+21	2.0907e+21	2.0158e+21
0.053	3.1763e+21	3.0203e+21	2.8415e+21	2.7642e+21	2.7072e+21	2.6866e+21	2.6296e+21	2.5522e+21	2.4942e+21	2.3754e+21	2.2923e+21	2.2125e+21	2.1487e+21	2.081e+21
0.05565	3.3358e+21	3.1096e+21	2.9504e+21	2.885e+21	2.8068e+21	2.7664e+21	2.7148e+21	2.6411e+21	2.5518e+21	2.4377e+21	2.3825e+21	2.2605e+21	2.1998e+21	2.1744e+21
0.0583	3.4623e+21	3.2533e+21	3.0716e+21	3.0228e+21	2.9182e+21	2.8761e+21	2.7938e+21	2.7301e+21	2.6342e+21	2.5061e+21	2.4496e+21	2.3494e+21	2.2651e+21	2.2381e+21
0.06095	3.6398e+21	3.3855e+21	3.2391e+21	3.1292e+21	3.0232e+21	3.0048e+21	2.8848e+21	2.7983e+21	2.7281e+21	2.5742e+21	2.5192e+21	2.4357e+21	2.3441e+21	2.2896e+21
0.0636	3.8493e+21	3.5259e+21	3.3828e+21	3.257e+21	3.1138e+21	3.1532e+21	3.0129e+21	2.8848e+21	2.8331e+21	2.6683e+21	2.5829e+21	2.4908e+21	2.3975e+21	2.3546e+21
0.06625	4.0695e+21	3.7039e+21	3.5636e+21	3.3863e+21	3.2268e+21	3.2607e+21	3.1616e+21	3.0075e+21	2.956e+21	2.7937e+21	2.6706e+21	2.5612e+21	2.4582e+21	2.4243e+21
0.0689	4.3494e+21	3.9126e+21	3.7677e+21	3.5404e+21	3.3866e+21	3.3906e+21	3.2915e+21	3.1575e+21	3.1066e+21	2.8976e+21	2.7563e+21	2.6686e+21	2.5355e+21	2.501e+21
0.07155	4.6037e+21	4.1043e+21	3.949e+21	3.7504e+21	3.569e+21	3.5104e+21	3.423e+21	3.2762e+21	3.2322e+21	3.017e+21	2.8801e+21	2.7555e+21	2.6187e+21	2.5845e+21
0.0742	4.891e+21	4.3647e+21	4.1724e+21	4.0084e+21	3.7466e+21	3.7255e+21	3.5601e+21	3.4524e+21	3.3655e+21	3.1489e+21	3.0235e+21	2.8772e+21	2.7202e+21	2.6769e+21
0.07685	5.1971e+21	4.6583e+21	4.4885e+21	4.2574e+21	3.9439e+21	3.9679e+21	3.7871e+21	3.6554e+21	3.5243e+21	3.2708e+21	3.18e+21	2.9867e+21	2.8478e+21	2.8041e+21
0.0795	5.4284e+21	4.9307e+21	4.7262e+21	4.5422e+21	4.1984e+21	4.2293e+21	4.0259e+21	3.8528e+21	3.7069e+21	3.4122e+21	3.284e+21	3.1035e+21	2.9505e+21	2.9236e+21
0.08215	5.609e+21	5.1976e+21	4.9884e+21	4.7786e+21	4.5013e+21	4.4688e+21	4.3095e+21	4.1051e+21	3.9451e+21	3.6157e+21	3.4375e+21	3.2133e+21	3.0855e+21	3.032e+21
0.0848	5.8257e+21	5.417e+21	5.2813e+21	5.0722e+21	4.8111e+21	4.8336e+21	4.5818e+21	4.4325e+21	4.1881e+21	3.8139e+21	3.6181e+21	3.3785e+21	3.2171e+21	3.1694e+21
0.08745	6.0343e+21	5.6484e+21	5.5625e+21	5.3504e+21	5.0845e+21	5.0725e+21	4.86e+21	4.7145e+21	4.4518e+21	4.0098e+21	3.8286e+21	3.5378e+21	3.362e+21	3.3197e+21
0.0901	6.2423e+21	5.9003e+21	5.7743e+21	5.5893e+21	5.3724e+21	5.3105e+21	5.1242e+21	4.9817e+21	4.7159e+21	4.2634e+21	4.1027e+21	3.7588e+21	3.5029e+21	3.4419e+21
0.09275	6.4091e+21	6.0942e+21	5.9893e+21	5.7829e+21	5.6166e+21	5.5723e+21	5.3994e+21	5.2385e+21	4.9843e+21	4.6094e+21	4.3182e+21	4.01e+21	3.7027e+21	3.6666e+21
0.0954	6.5485e+21	6.3513e+21	6.2156e+21	5.9645e+21	5.8239e+21	5.8007e+21	5.6659e+21	5.4615e+21	5.2417e+21	4.9657e+21	4.6222e+21	4.2716e+21	3.9316e+21	3.8923e+21
0.09805	6.7351e+21	6.5186e+21	6.3883e+21	6.1514e+21	6.0092e+21	6.0176e+21	5.8601e+21	5.7164e+21	5.4975e+21	5.2129e+21	4.9631e+21	4.5617e+21	4.1936e+21	4.1729e+21
0.1007	6.8599e+21	6.6686e+21	6.5275e+21	6.3413e+21	6.2438e+21	6.2473e+21	6.0867e+21	5.9751e+21	5.7074e+21	5.4538e+21	5.2082e+21	4.8198e+21	4.4837e+21	4.4072e+21
0.10335	6.9544e+21	6.8101e+21	6.6904e+21	6.5105e+21	6.4318e+21	6.4175e+21	6.2852e+21	6.1556e+21	5.9294e+21	5.6919e+21	5.4305e+21	5.0962e+21	4.8e+21	4.7074e+21
0.106	7.0783e+21	6.9453e+21	6.8592e+21	6.6801e+21	6.5994e+21	6.6219e+21	6.4919e+21	6.3552e+21	6.1797e+21	5.9331e+21	5.6906e+21	5.3989e+21	5.0751e+21	5.0064e+21
0.10865	7.19e+21	7.0632e+21	6.9965e+21	6.792e+21	6.7418e+21	6.745e+21	6.6298e+21	6.5779e+21	6.4307e+21	6.1674e+21	5.8858e+21	5.6474e+21	5.318e+21	5.282e+21
0.1113	7.2685e+21	7.1582e+21	7.087e+21	6.9252e+21	6.8944e+21	6.8587e+21	6.7473e+21	6.7056e+21	6.5935e+21	6.3675e+21	6.105e+21	5.8511e+21	5.5616e+21	5.5127e+21
0.11395	7.3173e+21	7.2373e+21	7.1471e+21	7.0572e+21	7.0165e+21	6.9933e+21	6.9164e+21	6.8301e+21	6.6523e+21	6.592e+21	6.2711e+21	6.0767e+21	5.7643e+21	5.7387e+21
0.1166	7.3601e+21	7.3362e+21	7.176e+21	7.131e+21	7.1107e+21	7.116e+21	7.0355e+21	6.9577e+21	6.8014e+21	6.7079e+21	6.4814e+21	6.2904e+21	5.9851e+21	5.9567e+21
0.11925	7.4372e+21	7.4069e+21	7.2612e+21	7.2365e+21	7.1861e+21	7.2033e+21	7.0742e+21	7.0516e+21	6.9192e+21	6.8299e+21	6.6343e+21	6.517e+21	6.2247e+21	6.1817e+21
0.1219	7.5103e+21	7.4547e+21	7.4289e+21	7.3148e+21	7.2638e+21	7.2839e+21	7.1907e+21	7.142e+21	7.0407e+21	6.9396e+21	6.754e+21	6.6472e+21	6.4778e+21	6.3763e+21
0.12455	7.5678e+21	7.4654e+21	7.4766e+21	7.3954e+21	7.349e+21	7.3746e+21	7.3442e+21	7.2481e+21	7.1453e+21	7.041e+21	6.867e+21	6.7845e+21	6.6146e+21	6.5361e+21
0.1272	7.627e+21	7.5191e+21	7.4834e+21	7.4946e+21	7.4594e+21	7.4521e+21	7.3825e+21	7.3716e+21	7.3015e+21	7.1e+21	7.0582e+21	6.8938e+21	6.74e+21	6.6572e+21
0.12985	7.6715e+21	7.5607e+21	7.5428e+21	7.524e+21	7.5818e+21	7.5283e+21	7.4909e+21	7.4623e+21	7.403e+21	7.2207e+21	7.1599e+21	7.0046e+21	6.8728e+21	6.787e+21
0.1325	7.6958e+21	7.5749e+21	7.5605e+21	7.5298e+21	7.6344e+21	7.5701e+21	7.561e+21	7.5738e+21	7.4399e+21	7.316e+21	7.2604e+21	7.1049e+21	6.9734e+21	6.902e+21
0.13515	7.6623e+21	7.5857e+21	7.6221e+21	7.5618e+21	7.6631e+21	7.6051e+21	7.6162e+21	7.6528e+21	7.5471e+21	7.3825e+21	7.314e+21	7.2016e+21	7.0621e+21	7.0237e+21
0.1378	7.6707e+21	7.6581e+21	7.6481e+21	7.59e+21	7.7181e+21	7.5877e+21	7.6138e+21	7.7052e+21	7.6307e+21	7.4516e+21	7.3831e+21	7.2507e+21	7.1328e+21	7.1562e+21
0.14045	7.6926e+21	7.6873e+21	7.7175e+21	7.5871e+21	7.6841e+21	7.623e+21	7.6431e+21	7.7399e+21	7.6164e+21	7.5496e+21	7.4944e+21	7.3385e+21	7.1987e+21	7.2572e+21
0.1431	7.6806e+21	7.7071e+21	7.7998e+21	7.6277e+21	7.7032e+21	7.6723e+21	7.6836e+21	7.7065e+21	7.5858e+21	7.5786e+21	7.5166e+21	7.4228e+21	7.2905e+21	7.3206e+21
0.14575	7.6677e+21	7.7629e+21	7.8664e+21	7.7098e+21	7.7202e+21	7.7052e+21	7.6974e+21	7.704e+21	7.585e+21	7.646e+21	7.5448e+21	7.4804e+21	7.4067e+21	7.3626e+21
0.1484	7.6954e+21	7.7731e+21	7.8626e+21	7.7719e+21	7.7432e+21	7.7018e+21	7.6872e+21	7.7191e+21	7.6441e+21	7.6638e+21	7.5997e+21	7.5488e+21	7.5288e+21	7.4454e+21
0.15105	7.6799e+21	7.7324e+21	7.8832e+21	7.7741e+21	7.7686e+21	7.7511e+21	7.7258e+21	7.7368e+21	7.6899e+21	7.6436e+21	7.6017e+21	7.6065e+21	7.5971e+21	7.5059e+21
0.1537	7.7152e+21	7.7415e+21	7.8342e+21	7.7882e+21	7.7928e+21	7.7935e+21	7.7275e+21	7.7528e+21	7.681e+21	7.6452e+21	7.6336e+21	7.6178e+21	7.6531e+21	7.5307e+21
0.15635	7.7661e+21	7.722e+21	7.7999e+21	7.7653e+21	7.8403e+21	7.8159e+21	7.7666e+21	7.7574e+21	7.6514e+21	7.664e+21	7.7057e+21	7.6598e+21	7.6764e+21	7.5346e+21
0.159	7.7103e+21	7.7074e+21	7.7452e+21	7.7798e+21	7.8507e+21	7.8344e+21	7.8118e+21	7.7917e+21	7.6826e+21	7.7047e+21	7.737e+21	7.6616e+21	7.7014e+21	7.5236e+21
0.16165	7.6938e+21	7.7014e+21	7.7353e+21	7.7953e+21	7.8633e+21	7.8377e+21	7.8492e+21	7.8481e+21	7.7472e+21	7.7279e+21	7.769e+21	7.6678e+21	7.7266e+21	7.5758e+21
0.1643	7.7065e+21	7.7194e+21	7.7309e+21	7.7203e+21	7.8883e+21	7.8416e+21	7.8319e+21	7.8635e+21	7.8046e+21	7.7393e+21	7.8212e+21	7.6893e+21	7.7342e+21	7.6028e+21
0.16695	7.7256e+21	7.729e+21	7.7323e+21	7.7113e+21	7.8678e+21	7.8762e+21	7.8009e+21	7.8787e+21	7.8199e+21	7.7636e+21	7.8258e+21	7.7171e+21	7.7269e+21	7.6724e+21
0.1696	7.7388e+21	7.712e+21	7.6877e+21	7.7169e+21	7.839e+21	7.869e+21	7.7865e+21	7.8534e+21	7.8063e+21	7.7708e+21	7.8173e+21	7.7849e+21	7.7505e+21	7.727e+21
0.17225	7.7706e+21	7.7223e+21	7.7042e+21	7.7223e+21	7.8218e+21	7.8338e+21	7.7743e+21	7.7872e+21	7.782e+21	7.7706e+21	7.8103e+21	7.8471e+21	7.7755e+21	7.7361e+21
0.1749	7.7719e+21	7.7495e+21	7.7834e+21	7.7269e+21	7.808e+21	7.7928e+21	7.7761e+21	7.7922e+21	7.7516e+21	7.7758e+21	7.7947e+21	7.7957e+21	7.7704e+21	7.7521e+21
0.17755	7.7278e+21	7.7801e+21	7.7943e+21	7.7318e+21	7.8072e+21	7.7939e+21	7.7993e+21	7.8176e+21	7.7117e+21	7.7543e+21	7.7881e+21	7.8139e+21	7.8149e+21	7.7235e+21
0.1802	7.7059e+21	7.8102e+21	7.7404e+21	7.7362e+21	7.7893e+21	7.8112e+21	7.8117e+21	7.8588e+21	7.7624e+21	7.7436e+21	7.8168e+21	7.8366e+21	7.8787e+21	7.7467e+21
0.18285	7.7335e+21	7.8228e+21	7.7597e+21	7.741e+21	7.8017e+21	7.8154e+21	7.8368e+21	7.8631e+21	7.7534e+21	7.7673e+21	7.8086e+21	7.7927e+21	7.914e+21	7.729e+21
0.1855	7.7567e+21	7.8154e+21	7.7339e+21	7.759e+21	7.8219e+21	7.8133e+21	7.8326e+21	7.8788e+21	7.7749e+21	7.7605e+21	7.7664e+21	7.7527e+21	7.8772e+21	7.739e+21
0.18815	7.7289e+21	7.7889e+21	7.7654e+21	7.8013e+21	7.8429e+21	7.8012e+21	7.7818e+21	7.8336e+21	7.7952e+21	7.7897e+21	7.7562e+21	7.7641e+21	7.8982e+21	7.7645e+21
0.1908	7.7075e+21	7.8045e+21	7.7815e+21	7.8121e+21	7.8798e+21	7.8019e+21	7.755e+21	7.8424e+21	7.8003e+21	7.7676e+21	7.7471e+21	7.7366e+21	7.8246e+21	7.7422e+21
0.19345	7.7324e+21	7.8124e+21	7.7733e+21	7.8074e+21	7.8496e+21	7.8112e+21	7.7741e+21	7.908e+21	7.7743e+21	7.7746e+21	7.7998e+21	7.768e+21	7.811e+21	7.7225e+21
0.1961	7.754e+21	7.8082e+21	7.7469e+21	7.7718e+21	7.8424e+21	7.8372e+21	7.8331e+21	7.9026e+21	7.7539e+21	7.7669e+21	7.8279e+21	7.8221e+21	7.8047e+21	7.7536e+21
0.19875	7.7396e+21	7.8441e+21	7.7732e+21	7.7049e+21	7.8223e+21	7.8471e+21	7.8428e+21	7.9479e+21	7.7572e+21	7.7743e+21	7.782e+21	7.8635e+21	7.8249e+21	7.7245e+21
0.2014	7.7242e+21	7.8313e+21	7.7774e+21	7.69e+21	7.834e+21	7.8407e+21	7.8195e+21	7.9337e+21	7.7622e+21	7.7812e+21	7.7703e+21	7.8357e+21	7.8437e+21	7.7479e+21
0.20405	7.6848e+21	7.8164e+21	7.8018e+21	7.6884e+21	7.8723e+21	7.8234e+21	7.7573e+21	7.8896e+21	7.7667e+21	7.8587e+21	7.725e+21	7.8459e+21	7.8371e+21	7.7921e+21
0.2067	7.7096e+21	7.7641e+21	7.8123e+21	7.724e+21	7.8919e+21	7.8145e+21	7.7861e+21	7.8584e+21	7.7907e+21	7.858e+21	7.7905e+21	7.8393e+21	7.8396e+21	7.7584e+21
0.20935	7.7405e+21	7.7688e+21	7.7929e+21	7.7438e+21	7.8454e+21	7.8198e+21	7.784e+21	7.8289e+21	7.8181e+21	7.8645e+21	7.8132e+21	7.8593e+21	7.8672e+21	7.7314e+21
0.212	7.7431e+21	7.7728e+21	7.7154e+21	7.7548e+21	7.8294e+21	7.801e+21	7.7887e+21	7.8299e+21	7.8499e+21	7.8767e+21	7.8406e+21	7.9013e+21	7.8654e+21	7.7554e+21
0.21465	7.7523e+21	7.7828e+21	7.6898e+21	7.7445e+21	7.8294e+21	7.7783e+21	7.8164e+21	7.8598e+21	7.8436e+21	7.9006e+21	7.8066e+21	7.9127e+21	7.8597e+21	7.7618e+21
0.2173	7.7249e+21	7.8063e+21	7.6756e+21	7.7413e+21	7.8439e+21	7.7533e+21	7.7728e+21	7.8709e+21	7.8431e+21	7.8746e+21	7.8287e+21	7.8759e+21	7.8409e+21	7.7797e+21
0.21995	7.6973e+21	7.8348e+21	7.7378e+21	7.7198e+21	7.7967e+21	7.7311e+21	7.7295e+21	7.846e+21	7.8131e+21	7.8833e+21	7.8627e+21	7.9322e+21	7.8691e+21	7.8099e+21
0.2226	7.6966e+21	7.8665e+21	7.786e+21	7.7138e+21	7.7821e+21	7.713e+21	7.7261e+21	7.7431e+21	7.8236e+21	7.8287e+21	7.8989e+21	7.9254e+21	7.8829e+21	7.7975e+21
0.22525	7.7212e+21	7.8479e+21	7.805e+21	7.747e+21	7.7719e+21	7.7866e+21	7.7284e+21	7.7168e+21	7.7329e+21	7.8283e+21	7.8755e+21	7.892e+21	7.8759e+21	7.8411e+21
0.2279	7.7081e+21	7.7677e+21	7.7982e+21	7.7537e+21	7.7857e+21	7.7953e+21	7.7413e+21	7.7229e+21	7.722e+21	7.8218e+21	7.8543e+21	7.8598e+21	7.9122e+21	7.8903e+21
0.23055	7.7023e+21	7.7778e+21	7.7517e+21	7.8227e+21	7.8434e+21	7.7785e+21	7.8042e+21	7.7789e+21	7.7408e+21	7.7994e+21	7.7901e+21	7.8681e+21	7.9052e+21	7.9016e+21
0.2332	7.6857e+21	7.7802e+21	7.7457e+21	7.8191e+21	7.8822e+21	7.8347e+21	7.8782e+21	7.8014e+21	7.7948e+21	7.7776e+21	7.7527e+21	7.8344e+21	7.8823e+21	7.9099e+21
0.23585	7.7315e+21	7.7882e+21	7.7e+21	7.7932e+21	7.8269e+21	7.8841e+21	7.9396e+21	7.8458e+21	7.8084e+21	7.7893e+21	7.773e+21	7.7871e+21	7.8765e+21	7.8647e+21
0.2385	7.7605e+21	7.7855e+21	7.701e+21	7.7964e+21	7.8008e+21	7.873e+21	7.9026e+21	7.8309e+21	7.8655e+21	7.7663e+21	7.8103e+21	7.807e+21	7.8668e+21	7.7978e+21
0.24115	7.78e+21	7.766e+21	7.7537e+21	7.8064e+21	7.8196e+21	7.8836e+21	7.8489e+21	7.7798e+21	7.8541e+21	7.7753e+21	7.8067e+21	7.8183e+21	7.8264e+21	7.7662e+21
0.2438	7.7498e+21	7.7658e+21	7.7509e+21	7.8375e+21	7.7905e+21	7.8624e+21	7.8239e+21	7.7835e+21	7.8329e+21	7.7922e+21	7.7747e+21	7.8487e+21	7.8386e+21	7.7493e+21
0.24645	7.6983e+21	7.7683e+21	7.7315e+21	7.8128e+21	7.7993e+21	7.9007e+21	7.8161e+21	7.792e+21	7.8574e+21	7.8177e+21	7.7469e+21	7.8717e+21	7.8154e+21	7.7704e+21
0.2491	7.6461e+21	7.7842e+21	7.7168e+21	7.8134e+21	7.8367e+21	7.8781e+21	7.8519e+21	7.7798e+21	7.8506e+21	7.7998e+21	7.7531e+21	7.878e+21	7.821e+21	7.8095e+21
0.25175	7.6335e+21	7.7915e+21	7.7544e+21	7.8251e+21	7.9015e+21	7.8861e+21	7.8627e+21	7.764e+21	7.88e+21	7.8151e+21	7.8059e+21	7.8948e+21	7.8148e+21	7.8497e+21
0.2544	7.6558e+21	7.7782e+21	7.7606e+21	7.8172e+21	7.906e+21	7.8818e+21	7.9229e+21	7.7491e+21	7.8794e+21	7.7907e+21	7.8385e+21	7.9281e+21	7.8349e+21	7.8458e+21
0.25705	7.6726e+21	7.7788e+21	7.7603e+21	7.7792e+21	7.8996e+21	7.8863e+21	7.8487e+21	7.7717e+21	7.866e+21	7.7615e+21	7.835e+21	7.9363e+21	7.8407e+21	7.8359e+21
0.2597	7.7218e+21	7.7802e+21	7.779e+21	7.7529e+21	7.9266e+21	7.89e+21	7.7883e+21	7.8353e+21	7.8474e+21	7.7256e+21	7.8048e+21	7.8933e+21	7.8521e+21	7.8151e+21
0.26235	7.7114e+21	7.8229e+21	7.8059e+21	7.7539e+21	7.883e+21	7.8927e+21	7.8058e+21	7.8621e+21	7.8595e+21	7.7441e+21	7.7867e+21	7.8995e+21	7.8634e+21	7.8056e+21
0.265	7.7032e+21	7.8039e+21	7.7992e+21	7.757e+21	7.8302e+21	7.8495e+21	7.8238e+21	7.831e+21	7.9053e+21	7.7633e+21	7.8146e+21	7.877e+21	7.7973e+21	7.8268e+21
0.26765	7.6862e+21	7.8119e+21	7.7815e+21	7.772e+21	7.8386e+21	7.8133e+21	7.8049e+21	7.8312e+21	7.9219e+21	7.7981e+21	7.8509e+21	7.9034e+21	7.7771e+21	7.8629e+21
0.2703	7.7159e+21	7.8185e+21	7.7687e+21	7.7383e+21	7.8328e+21	7.8374e+21	7.8208e+21	7.8131e+21	7.8981e+21	7.842e+21	7.8587e+21	7.8729e+21	7.7999e+21	7.8342e+21
0.27295	7.7755e+21	7.8474e+21	7.8565e+21	7.7295e+21	7.8689e+21	7.8208e+21	7.8237e+21	7.8044e+21	7.8638e+21	7.857e+21	7.8239e+21	7.8489e+21	7.8072e+21	7.8117e+21
0.2756	7.7617e+21	7.8809e+21	7.8988e+21	7.7983e+21	7.8818e+21	7.8036e+21	7.8038e+21	7.8659e+21	7.8384e+21	7.8665e+21	7.7798e+21	7.8187e+21	7.8219e+21	7.819e+21
0.27825	7.7024e+21	7.8748e+21	7.9059e+21	7.8362e+21	7.8722e+21	7.804e+21	7.7353e+21	7.8536e+21	7.8133e+21	7.8608e+21	7.7601e+21	7.8235e+21	7.8954e+21	7.8611e+21
0.2809	7.7142e+21	7.8633e+21	7.8543e+21	7.8837e+21	7.8678e+21	7.8541e+21	7.74e+21	7.8121e+21	7.7737e+21	7.8279e+21	7.7597e+21	7.7782e+21	7.8936e+21	7.8794e+21
0.28355	7.7607e+21	7.8464e+21	7.8434e+21	7.9152e+21	7.8363e+21	7.9257e+21	7.8306e+21	7.812e+21	7.7566e+21	7.8182e+21	7.7446e+21	7.7836e+21	7.8524e+21	7.8454e+21
0.2862	7.7849e+21	7.8183e+21	7.8087e+21	7.8879e+21	7.8237e+21	7.9164e+21	7.9383e+21	7.8605e+21	7.7893e+21	7.7764e+21	7.7577e+21	7.7705e+21	7.8063e+21	7.7968e+21
0.28885	7.7433e+21	7.7756e+21	7.8158e+21	7.8265e+21	7.8403e+21	7.8289e+21	7.933e+21	7.8758e+21	7.8409e+21	7.7829e+21	7.787e+21	7.7566e+21	7.7987e+21	7.8095e+21
0.2915	7.7334e+21	7.7732e+21	7.8047e+21	7.7746e+21	7.8395e+21	7.7894e+21	7.8838e+21	7.8708e+21	7.8625e+21	7.8702e+21	7.7981e+21	7.7593e+21	7.793e+21	7.8187e+21
0.29415	7.7037e+21	7.8034e+21	7.81e+21	7.7355e+21	7.8625e+21	7.8187e+21	7.8613e+21	7.8846e+21	7.8336e+21	7.9384e+21	7.8058e+21	7.7996e+21	7.7667e+21	7.7844e+21
0.2968	7.6862e+21	7.8283e+21	7.8161e+21	7.7438e+21	7.8444e+21	7.8826e+21	7.8301e+21	7.9308e+21	7.8446e+21	7.9077e+21	7.808e+21	7.8583e+21	7.7798e+21	7.7465e+21
0.29945	7.6601e+21	7.8038e+21	7.8107e+21	7.7336e+21	7.8316e+21	7.866e+21	7.7846e+21	7.9228e+21	7.8056e+21	7.8825e+21	7.7764e+21	7.8993e+21	7.8363e+21	7.7497e+21
0.3021	7.6588e+21	7.7777e+21	7.8422e+21	7.7309e+21	7.8057e+21	7.8061e+21	7.7795e+21	7.8364e+21	7.7836e+21	7.8768e+21	7.8286e+21	7.8903e+21	7.8996e+21	7.8316e+21
0.30475	7.7302e+21	7.7532e+21	7.8709e+21	7.6794e+21	7.84e+21	7.8052e+21	7.7947e+21	7.8369e+21	7.7272e+21	7.8841e+21	7.8752e+21	7.8687e+21	7.8622e+21	7.8645e+21
0.3074	7.7467e+21	7.6973e+21	7.8609e+21	7.6401e+21	7.8355e+21	7.7995e+21	7.787e+21	7.8259e+21	7.6845e+21	7.806e+21	7.8827e+21	7.9112e+21	7.8684e+21	7.874e+21
0.31005	7.7059e+21	7.6859e+21	7.8398e+21	7.6593e+21	7.794e+21	7.7861e+21	7.8037e+21	7.8518e+21	7.6601e+21	7.7456e+21	7.8183e+21	7.8943e+21	7.8684e+21	7.863e+21
0.3127	7.6777e+21	7.6753e+21	7.7998e+21	7.6195e+21	7.7577e+21	7.7489e+21	7.7607e+21	7.8118e+21	7.667e+21	7.7094e+21	7.7302e+21	7.8352e+21	7.7948e+21	7.8155e+21
0.31535	7.6483e+21	7.7268e+21	7.7703e+21	7.5107e+21	7.7377e+21	7.74e+21	7.744e+21	7.7012e+21	7.6226e+21	7.7147e+21	7.6646e+21	7.7705e+21	7.7525e+21	7.7611e+21
0.318	7.5941e+21	7.7679e+21	7.7563e+21	7.5007e+21	7.7148e+21	7.7244e+21	7.7586e+21	7.6556e+21	7.6211e+21	7.7135e+21	7.619e+21	7.7143e+21	7.7051e+21	7.7318e+21
0.32065	7.5901e+21	7.7113e+21	7.6933e+21	7.4796e+21	7.7126e+21	7.6997e+21	7.7457e+21	7.6291e+21	7.5989e+21	7.6546e+21	7.5968e+21	7.6703e+21	7.6713e+21	7.6772e+21
0.3233	7.557e+21	7.6029e+21	7.6239e+21	7.492e+21	7.7041e+21	7.6458e+21	7.6931e+21	7.5804e+21	7.6152e+21	7.629e+21	7.5628e+21	7.5893e+21	7.6145e+21	7.559e+21
0.32595	7.5267e+21	7.5257e+21	7.5614e+21	7.5173e+21	7.7045e+21	7.658e+21	7.6491e+21	7.5325e+21	7.5418e+21	7.5917e+21	7.5056e+21	7.5349e+21	7.59e+21	7.5027e+21
0.3286	7.4902e+21	7.4661e+21	7.486e+21	7.4842e+21	7.6386e+21	7.6359e+21	7.6227e+21	7.5094e+21	7.4729e+21	7.5062e+21	7.5017e+21	7.483e+21	7.507e+21	7.479e+21
0.33125	7.4384e+21	7.3908e+21	7.4615e+21	7.4249e+21	7.5686e+21	7.5344e+21	7.565e+21	7.4618e+21	7.3834e+21	7.4307e+21	7.4214e+21	7.3906e+21	7.4515e+21	7.3868e+21
0.3339	7.3347e+21	7.3187e+21	7.4006e+21	7.388e+21	7.4854e+21	7.438e+21	7.4528e+21	7.3742e+21	7.3142e+21	7.354e+21	7.4007e+21	7.3211e+21	7.4124e+21	7.2626e+21
0.33655	7.2562e+21	7.2641e+21	7.3389e+21	7.3279e+21	7.4432e+21	7.3591e+21	7.3453e+21	7.3024e+21	7.2666e+21	7.3317e+21	7.3471e+21	7.2075e+21	7.3177e+21	7.2125e+21
0.3392	7.1962e+21	7.2278e+21	7.2564e+21	7.2583e+21	7.2992e+21	7.2865e+21	7.2556e+21	7.2127e+21	7.1773e+21	7.2502e+21	7.2837e+21	7.1127e+21	7.1791e+21	7.0995e+21
0.34185	7.1023e+21	7.1855e+21	7.1556e+21	7.1342e+21	7.1627e+21	7.1696e+21	7.1275e+21	7.0549e+21	7.0491e+21	7.1717e+21	7.1986e+21	7.072e+21	7.0817e+21	7.0057e+21
0.3445	6.9949e+21	7.0832e+21	7.0652e+21	7.0585e+21	7.0394e+21	7.0647e+21	7.0028e+21	6.9316e+21	6.9167e+21	6.9994e+21	7.1249e+21	7.0137e+21	6.9931e+21	6.8476e+21
0.34715	6.8766e+21	6.9651e+21	6.9846e+21	6.9647e+21	6.9125e+21	6.9535e+21	6.9232e+21	6.7825e+21	6.7748e+21	6.8101e+21	6.9354e+21	6.8696e+21	6.8757e+21	6.6943e+21
0.3498	6.682e+21	6.8073e+21	6.8929e+21	6.8286e+21	6.79e+21	6.8214e+21	6.6872e+21	6.6295e+21	6.6198e+21	6.5812e+21	6.7132e+21	6.6367e+21	6.6955e+21	6.485e+21
0.35245	6.429e+21	6.6064e+21	6.7262e+21	6.6666e+21	6.6474e+21	6.6206e+21	6.4296e+21	6.4046e+21	6.3439e+21	6.3846e+21	6.4869e+21	6.3818e+21	6.4537e+21	6.2741e+21
0.3551	6.1505e+21	6.3717e+21	6.4761e+21	6.4417e+21	6.4415e+21	6.3287e+21	6.2537e+21	6.1832e+21	6.1278e+21	6.1378e+21	6.2743e+21	6.1445e+21	6.1747e+21	6.0284e+21
0.35775	5.929e+21	6.0398e+21	6.1743e+21	6.1822e+21	6.1931e+21	6.1039e+21	5.9692e+21	5.9398e+21	5.8656e+21	5.8458e+21	6.0197e+21	5.9289e+21	5.9239e+21	5.7012e+21
0.3604	5.7211e+21	5.8371e+21	5.8783e+21	5.9312e+21	5.9103e+21	5.7982e+21	5.7326e+21	5.6832e+21	5.6363e+21	5.6055e+21	5.6946e+21	5.6809e+21	5.66e+21	5.4184e+21
0.36305	5.4441e+21	5.5989e+21	5.6256e+21	5.6516e+21	5.6329e+21	5.5473e+21	5.503e+21	5.4361e+21	5.4324e+21	5.3807e+21	5.434e+21	5.4357e+21	5.441e+21	5.226e+21
0.3657	5.2442e+21	5.3667e+21	5.4529e+21	5.4535e+21	5.4468e+21	5.3735e+21	5.2787e+21	5.2813e+21	5.2872e+21	5.2301e+21	5.2659e+21	5.2284e+21	5.2318e+21	5.08e+21
0.36835	5.0935e+21	5.2131e+21	5.2771e+21	5.2652e+21	5.2181e+21	5.2002e+21	5.1419e+21	5.1674e+21	5.1666e+21	5.1022e+21	5.1899e+21	5.0885e+21	5.0784e+21	4.9604e+21
0.371	5.0059e+21	5.0679e+21	5.0726e+21	5.1362e+21	5.0531e+21	5.0636e+21	5.0328e+21	5.0504e+21	5.0624e+21	4.9857e+21	5.1328e+21	4.9552e+21	4.9622e+21	4.8477e+21
0.37365	4.8951e+21	4.9706e+21	5.0086e+21	5.0161e+21	4.9486e+21	4.9572e+21	4.9452e+21	4.9619e+21	4.9716e+21	4.8916e+21	5.0299e+21	4.8828e+21	4.9044e+21	4.8115e+21
0.3763	4.8198e+21	4.8752e+21	4.9152e+21	4.9406e+21	4.863e+21	4.8655e+21	4.8922e+21	4.9035e+21	4.9296e+21	4.8418e+21	4.9287e+21	4.8595e+21	4.852e+21	4.7578e+21
0.37895	4.7387e+21	4.8208e+21	4.8532e+21	4.8632e+21	4.8169e+21	4.797e+21	4.8379e+21	4.8348e+21	4.8893e+21	4.7735e+21	4.8701e+21	4.8227e+21	4.801e+21	4.725e+21
0.3816	4.6742e+21	4.7719e+21	4.7832e+21	4.7927e+21	4.7843e+21	4.7673e+21	4.7729e+21	4.7814e+21	4.8181e+21	4.7255e+21	4.8026e+21	4.7615e+21	4.7574e+21	4.6644e+21
0.38425	4.6129e+21	4.7384e+21	4.7675e+21	4.7603e+21	4.7268e+21	4.7473e+21	4.7103e+21	4.7536e+21	4.7274e+21	4.695e+21	4.7529e+21	4.7071e+21	4.7258e+21	4.6338e+21
0.3869	4.5983e+21	4.7286e+21	4.7408e+21	4.7082e+21	4.6746e+21	4.727e+21	4.6584e+21	4.7068e+21	4.6665e+21	4.6452e+21	4.7096e+21	4.6744e+21	4.7049e+21	4.611e+21
0.38955	4.5547e+21	4.6659e+21	4.6816e+21	4.6648e+21	4.6145e+21	4.6706e+21	4.6022e+21	4.6641e+21	4.6313e+21	4.5791e+21	4.6512e+21	4.6371e+21	4.6872e+21	4.5706e+21
0.3922	4.4799e+21	4.6083e+21	4.5835e+21	4.6183e+21	4.5906e+21	4.6617e+21	4.5897e+21	4.6163e+21	4.6179e+21	4.5722e+21	4.5838e+21	4.5947e+21	4.6194e+21	4.515e+21
0.39485	4.4083e+21	4.5663e+21	4.5418e+21	4.56e+21	4.5461e+21	4.6388e+21	4.5864e+21	4.5974e+21	4.5867e+21	4.5544e+21	4.5412e+21	4.5741e+21	4.5541e+21	4.4868e+21
0.3975	4.4088e+21	4.5362e+21	4.5001e+21	4.5163e+21	4.5406e+21	4.6185e+21	4.5486e+21	4.5697e+21	4.5362e+21	4.5516e+21	4.51e+21	4.5406e+21	4.5112e+21	4.4223e+21
0.40015	4.3929e+21	4.481e+21	4.5021e+21	4.5072e+21	4.523e+21	4.5536e+21	4.5081e+21	4.5381e+21	4.4787e+21	4.5518e+21	4.4989e+21	4.514e+21	4.5029e+21	4.4007e+21
0.4028	4.3486e+21	4.4676e+21	4.4804e+21	4.5149e+21	4.4899e+21	4.526e+21	4.48e+21	4.4729e+21	4.4644e+21	4.523e+21	4.4904e+21	4.5021e+21	4.4725e+21	4.398e+21
0.40545	4.2996e+21	4.4461e+21	4.4438e+21	4.5047e+21	4.466e+21	4.5146e+21	4.4585e+21	4.4261e+21	4.4544e+21	4.4989e+21	4.4693e+21	4.4561e+21	4.4368e+21	4.4039e+21
0.4081	4.2744e+21	4.4242e+21	4.3817e+21	4.4628e+21	4.4499e+21	4.4924e+21	4.4595e+21	4.3901e+21	4.4391e+21	4.4538e+21	4.4281e+21	4.4226e+21	4.429e+21	4.3899e+21
0.41075	4.2649e+21	4.4274e+21	4.3623e+21	4.4235e+21	4.4461e+21	4.4712e+21	4.4573e+21	4.3938e+21	4.4541e+21	4.3955e+21	4.3904e+21	4.3979e+21	4.4371e+21	4.3949e+21
0.4134	4.2404e+21	4.4083e+21	4.3709e+21	4.4136e+21	4.4429e+21	4.4497e+21	4.4492e+21	4.3995e+21	4.4391e+21	4.3944e+21	4.3811e+21	4.3821e+21	4.4294e+21	4.3788e+21
0.41605	4.2349e+21	4.3626e+21	4.3527e+21	4.4191e+21	4.4342e+21	4.4182e+21	4.3967e+21	4.411e+21	4.4046e+21	4.3965e+21	4.3792e+21	4.3529e+21	4.3995e+21	4.3863e+21
0.4187	4.2505e+21	4.3176e+21	4.3345e+21	4.4021e+21	4.4079e+21	4.3986e+21	4.3744e+21	4.4058e+21	4.3706e+21	4.3958e+21	4.3729e+21	4.3569e+21	4.3791e+21	4.3788e+21
0.42135	4.2273e+21	4.2841e+21	4.3233e+21	4.3807e+21	4.3975e+21	4.3888e+21	4.3397e+21	4.4181e+21	4.349e+21	4.3701e+21	4.3623e+21	4.3473e+21	4.4004e+21	4.3477e+21
0.424	4.214e+21	4.2693e+21	4.3097e+21	4.362e+21	4.3777e+21	4.3806e+21	4.3426e+21	4.4115e+21	4.317e+21	4.3597e+21	4.3346e+21	4.3488e+21	4.3924e+21	4.3237e+21
0.42665	4.1877e+21	4.2904e+21	4.2884e+21	4.349e+21	4.3565e+21	4.3352e+21	4.3535e+21	4.4043e+21	4.3046e+21	4.34e+21	4.2962e+21	4.3493e+21	4.3531e+21	4.3143e+21
0.4293	4.1465e+21	4.3454e+21	4.3101e+21	4.2944e+21	4.3381e+21	4.3056e+21	4.3196e+21	4.3539e+21	4.3192e+21	4.3237e+21	4.2882e+21	4.3345e+21	4.3392e+21	4.2896e+21
0.43195	4.1237e+21	4.3327e+21	4.3174e+21	4.2946e+21	4.2743e+21	4.2821e+21	4.2924e+21	4.3037e+21	4.3096e+21	4.3209e+21	4.293e+21	4.3159e+21	4.3407e+21	4.2949e+21
0.4346	4.0932e+21	4.2843e+21	4.2986e+21	4.3211e+21	4.2374e+21	4.2508e+21	4.291e+21	4.2878e+21	4.3019e+21	4.3075e+21	4.2684e+21	4.2966e+21	4.3356e+21	4.315e+21
0.43725	4.0783e+21	4.2736e+21	4.2922e+21	4.3157e+21	4.2231e+21	4.253e+21	4.2691e+21	4.2671e+21	4.3163e+21	4.299e+21	4.2978e+21	4.2972e+21	4.313e+21	4.3066e+21
0.4399	4.0653e+21	4.2509e+21	4.2621e+21	4.2862e+21	4.216e+21	4.2382e+21	4.2447e+21	4.2606e+21	4.327e+21	4.2785e+21	4.2768e+21	4.3247e+21	4.3037e+21	4.2985e+21
0.44255	4.0335e+21	4.2246e+21	4.2241e+21	4.2772e+21	4.2289e+21	4.2494e+21	4.2536e+21	4.2641e+21	4.2952e+21	4.2838e+21	4.2608e+21	4.3286e+21	4.3274e+21	4.2948e+21
0.4452	4.0066e+21	4.1779e+21	4.1879e+21	4.2699e+21	4.2356e+21	4.2575e+21	4.2555e+21	4.2537e+21	4.2837e+21	4.2641e+21	4.2322e+21	4.279e+21	4.2797e+21	4.2966e+21
0.44785	3.9758e+21	4.1762e+21	4.1868e+21	4.2694e+21	4.2431e+21	4.2657e+21	4.2917e+21	4.2777e+21	4.2402e+21	4.2451e+21	4.2252e+21	4.2547e+21	4.2385e+21	4.2715e+21
0.4505	3.9547e+21	4.1559e+21	4.1913e+21	4.2676e+21	4.2298e+21	4.2506e+21	4.2861e+21	4.2726e+21	4.2098e+21	4.2322e+21	4.2532e+21	4.2406e+21	4.2047e+21	4.2609e+21
0.45315	3.9916e+21	4.1218e+21	4.1692e+21	4.2048e+21	4.2283e+21	4.2165e+21	4.2739e+21	4.2413e+21	4.2038e+21	4.2123e+21	4.2561e+21	4.242e+21	4.1995e+21	4.25e+21
0.4558	4.0019e+21	4.1048e+21	4.1498e+21	4.1699e+21	4.2089e+21	4.2163e+21	4.2365e+21	4.1985e+21	4.194e+21	4.2232e+21	4.2489e+21	4.2331e+21	4.2166e+21	4.2277e+21
0.45845	3.9881e+21	4.1076e+21	4.1214e+21	4.1597e+21	4.1644e+21	4.2101e+21	4.1935e+21	4.1558e+21	4.1703e+21	4.2429e+21	4.2159e+21	4.2146e+21	4.2284e+21	4.2145e+21
0.4611	3.9752e+21	4.0981e+21	4.0846e+21	4.139e+21	4.1434e+21	4.2015e+21	4.1689e+21	4.1557e+21	4.1476e+21	4.224e+21	4.2088e+21	4.2197e+21	4.2335e+21	4.2104e+21
0.46375	3.9644e+21	4.0828e+21	4.0593e+21	4.1159e+21	4.1474e+21	4.201e+21	4.1e+21	4.1751e+21	4.1591e+21	4.2105e+21	4.1816e+21	4.2395e+21	4.2152e+21	4.1952e+21
0.4664	3.9825e+21	4.0666e+21	4.0573e+21	4.1227e+21	4.133e+21	4.1645e+21	4.0755e+21	4.1814e+21	4.1244e+21	4.1966e+21	4.1475e+21	4.2236e+21	4.1961e+21	4.1924e+21
0.46905	4.0105e+21	4.071e+21	4.0678e+21	4.1544e+21	4.1306e+21	4.1056e+21	4.1278e+21	4.1657e+21	4.1399e+21	4.1661e+21	4.1662e+21	4.2002e+21	4.1819e+21	4.2218e+21
0.4717	3.9835e+21	4.0703e+21	4.0676e+21	4.1548e+21	4.098e+21	4.094e+21	4.1205e+21	4.1419e+21	4.1143e+21	4.1726e+21	4.1781e+21	4.2031e+21	4.155e+21	4.2282e+21
0.47435	3.9379e+21	4.0546e+21	4.0772e+21	4.1313e+21	4.0724e+21	4.11e+21	4.1278e+21	4.1158e+21	4.0922e+21	4.1558e+21	4.1906e+21	4.1949e+21	4.1427e+21	4.2158e+21
0.477	3.9288e+21	4.039e+21	4.0796e+21	4.1032e+21	4.0732e+21	4.0905e+21	4.1251e+21	4.1221e+21	4.097e+21	4.1477e+21	4.1741e+21	4.1623e+21	4.142e+21	4.2019e+21
0.47965	3.947e+21	4.0175e+21	4.0815e+21	4.0715e+21	4.0947e+21	4.0993e+21	4.1036e+21	4.1008e+21	4.0946e+21	4.1588e+21	4.1464e+21	4.1332e+21	4.1578e+21	4.1802e+21
0.4823	3.936e+21	3.9878e+21	4.0576e+21	4.0694e+21	4.1121e+21	4.113e+21	4.0947e+21	4.0617e+21	4.0758e+21	4.155e+21	4.112e+21	4.1274e+21	4.1668e+21	4.139e+21
0.48495	3.9202e+21	3.953e+21	4.0415e+21	4.0677e+21	4.1121e+21	4.1174e+21	4.083e+21	4.0736e+21	4.0444e+21	4.1733e+21	4.0858e+21	4.1456e+21	4.1559e+21	4.118e+21
0.4876	3.9183e+21	3.9367e+21	4.045e+21	4.0701e+21	4.0822e+21	4.0976e+21	4.0575e+21	4.1018e+21	4.0623e+21	4.1598e+21	4.0736e+21	4.1279e+21	4.0956e+21	4.1231e+21
0.49025	3.8892e+21	3.9308e+21	4.0323e+21	4.0489e+21	4.034e+21	4.0895e+21	4.0571e+21	4.1247e+21	4.0643e+21	4.1478e+21	4.0783e+21	4.0988e+21	4.0892e+21	4.1302e+21
0.4929	3.8566e+21	3.9092e+21	4.0322e+21	4.0073e+21	4.0241e+21	4.0805e+21	4.0414e+21	4.0962e+21	4.0432e+21	4.1435e+21	4.0755e+21	4.0904e+21	4.101e+21	4.1324e+21
0.49555	3.855e+21	3.9195e+21	3.9924e+21	3.9924e+21	4.0374e+21	4.0568e+21	4.0345e+21	4.0499e+21	4.0203e+21	4.1228e+21	4.0796e+21	4.0721e+21	4.0738e+21	4.1052e+21
0.4982	3.8411e+21	3.9253e+21	3.9481e+21	4.0167e+21	4.0553e+21	4.012e+21	3.9879e+21	4.0632e+21	4.0048e+21	4.111e+21	4.072e+21	4.0527e+21	4.0713e+21	4.0945e+21
0.50085	3.8352e+21	3.9192e+21	3.9429e+21	4.0195e+21	4.0643e+21	3.971e+21	3.9823e+21	4.0438e+21	3.9993e+21	4.1301e+21	4.0628e+21	4.0626e+21	4.0933e+21	4.0864e+21
0.5035	3.8279e+21	3.8799e+21	3.9438e+21	3.9902e+21	4.052e+21	3.9492e+21	4.0049e+21	4.0332e+21	3.9766e+21	4.1263e+21	4.061e+21	4.0821e+21	4.0755e+21	4.0664e+21
0.50615	3.8269e+21	3.8604e+21	3.906e+21	4.0047e+21	4.026e+21	3.951e+21	4.0245e+21	4.0232e+21	3.9815e+21	4.077e+21	4.0396e+21	4.0662e+21	4.0678e+21	4.0781e+21
0.5088	3.8071e+21	3.8745e+21	3.8841e+21	3.9885e+21	4.014e+21	3.9248e+21	3.9924e+21	4.0161e+21	3.9875e+21	4.0435e+21	4.0113e+21	4.0605e+21	4.0537e+21	4.0771e+21
0.51145	3.7702e+21	3.8748e+21	3.8833e+21	3.9826e+21	3.9895e+21	3.9061e+21	3.9946e+21	3.9918e+21	3.9993e+21	4.0592e+21	3.9935e+21	4.0323e+21	4.0624e+21	4.0802e+21
0.5141	3.7833e+21	3.847e+21	3.8915e+21	3.9862e+21	3.9698e+21	3.9049e+21	3.9828e+21	3.9718e+21	4.0102e+21	4.0608e+21	4.0169e+21	4.0151e+21	4.08e+21	4.0534e+21
0.51675	3.7754e+21	3.8196e+21	3.8849e+21	3.9709e+21	3.9577e+21	3.9354e+21	3.9678e+21	3.9595e+21	4.0052e+21	4.0558e+21	4.0275e+21	4.0278e+21	4.055e+21	4.0425e+21
0.5194	3.7621e+21	3.8247e+21	3.8423e+21	3.9015e+21	3.925e+21	3.9581e+21	3.9563e+21	3.9377e+21	3.9798e+21	4.0577e+21	4.032e+21	4.0304e+21	4.0554e+21	4.0342e+21
0.52205	3.763e+21	3.8251e+21	3.8194e+21	3.8628e+21	3.9051e+21	3.9579e+21	3.9481e+21	3.9357e+21	3.973e+21	4.058e+21	4.0201e+21	4.0305e+21	4.0211e+21	4.0341e+21
0.5247	3.7602e+21	3.8157e+21	3.8263e+21	3.841e+21	3.9011e+21	3.9214e+21	3.9233e+21	3.9386e+21	3.9442e+21	4.0326e+21	4.023e+21	4.0242e+21	4.0008e+21	4.0227e+21
0.52735	3.7531e+21	3.7987e+21	3.8295e+21	3.8143e+21	3.8657e+21	3.898e+21	3.8918e+21	3.941e+21	3.9546e+21	4.0077e+21	4.0112e+21	3.9967e+21	4.0088e+21	4.0274e+21
0.53	3.784e+21	3.7825e+21	3.8202e+21	3.8078e+21	3.8503e+21	3.8994e+21	3.9095e+21	3.9448e+21	3.9501e+21	3.9864e+21	3.9812e+21	3.9778e+21	4.0181e+21	4.0367e+21
0.53265	3.7798e+21	3.7658e+21	3.7955e+21	3.8303e+21	3.839e+21	3.8981e+21	3.8928e+21	3.9425e+21	3.8996e+21	3.9752e+21	3.9949e+21	4.0107e+21	4.0043e+21	4.019e+21
0.5353	3.7728e+21	3.7866e+21	3.7914e+21	3.8426e+21	3.8379e+21	3.8887e+21	3.8684e+21	3.9256e+21	3.8706e+21	3.9715e+21	3.9719e+21	3.9858e+21	3.9723e+21	4.0009e+21
0.53795	3.7919e+21	3.7753e+21	3.805e+21	3.8277e+21	3.8341e+21	3.8574e+21	3.8419e+21	3.9097e+21	3.8582e+21	3.9435e+21	3.9632e+21	3.9408e+21	3.9464e+21	4.0041e+21
0.5406	3.7882e+21	3.7727e+21	3.8097e+21	3.7956e+21	3.8373e+21	3.8504e+21	3.8601e+21	3.8846e+21	3.8604e+21	3.9409e+21	3.9185e+21	3.9317e+21	3.9409e+21	4.015e+21
0.54325	3.7706e+21	3.7755e+21	3.8188e+21	3.7647e+21	3.8216e+21	3.8307e+21	3.8727e+21	3.8776e+21	3.8506e+21	3.9445e+21	3.907e+21	3.9165e+21	3.936e+21	4.0001e+21
0.5459	3.7456e+21	3.7821e+21	3.8177e+21	3.7414e+21	3.8207e+21	3.8093e+21	3.878e+21	3.8778e+21	3.8319e+21	3.9514e+21	3.885e+21	3.9099e+21	3.9531e+21	3.9797e+21
0.54855	3.7159e+21	3.766e+21	3.8206e+21	3.7675e+21	3.795e+21	3.8178e+21	3.8839e+21	3.8945e+21	3.8527e+21	3.9449e+21	3.874e+21	3.8838e+21	3.9546e+21	3.9492e+21
0.5512	3.7005e+21	3.7624e+21	3.8193e+21	3.7935e+21	3.7762e+21	3.8316e+21	3.877e+21	3.8678e+21	3.8647e+21	3.929e+21	3.8691e+21	3.8595e+21	3.9438e+21	3.9174e+21
0.55385	3.681e+21	3.7547e+21	3.7954e+21	3.8082e+21	3.7697e+21	3.8071e+21	3.8613e+21	3.8263e+21	3.8278e+21	3.915e+21	3.8536e+21	3.8642e+21	3.937e+21	3.9147e+21
0.5565	3.709e+21	3.74e+21	3.7659e+21	3.779e+21	3.7738e+21	3.7791e+21	3.8482e+21	3.857e+21	3.8103e+21	3.8973e+21	3.8734e+21	3.8657e+21	3.9569e+21	3.9087e+21
0.55915	3.6706e+21	3.7214e+21	3.7603e+21	3.7835e+21	3.7873e+21	3.7825e+21	3.832e+21	3.8722e+21	3.8361e+21	3.8636e+21	3.8815e+21	3.8706e+21	3.9473e+21	3.896e+21
0.5618	3.6478e+21	3.6853e+21	3.789e+21	3.7921e+21	3.7995e+21	3.7709e+21	3.8216e+21	3.8701e+21	3.8476e+21	3.8301e+21	3.8564e+21	3.8529e+21	3.9434e+21	3.889e+21
0.56445	3.6362e+21	3.6731e+21	3.7584e+21	3.785e+21	3.8013e+21	3.7654e+21	3.8045e+21	3.8427e+21	3.8223e+21	3.8226e+21	3.8356e+21	3.8282e+21	3.9388e+21	3.8849e+21
0.5671	3.6076e+21	3.6656e+21	3.7287e+21	3.7723e+21	3.7862e+21	3.7877e+21	3.798e+21	3.8331e+21	3.8124e+21	3.825e+21	3.8393e+21	3.8426e+21	3.9204e+21	3.8759e+21
0.56975	3.5815e+21	3.6519e+21	3.7181e+21	3.7329e+21	3.7707e+21	3.7682e+21	3.7911e+21	3.8255e+21	3.8345e+21	3.8276e+21	3.8425e+21	3.8361e+21	3.9281e+21	3.8516e+21
0.5724	3.5678e+21	3.6712e+21	3.7e+21	3.7212e+21	3.7487e+21	3.7729e+21	3.7967e+21	3.8074e+21	3.8527e+21	3.8191e+21	3.828e+21	3.8016e+21	3.9206e+21	3.827e+21
0.57505	3.5632e+21	3.6698e+21	3.6894e+21	3.706e+21	3.7024e+21	3.8013e+21	3.7741e+21	3.7703e+21	3.8413e+21	3.8137e+21	3.8331e+21	3.8046e+21	3.9089e+21	3.8312e+21
0.5777	3.5466e+21	3.6481e+21	3.6845e+21	3.7176e+21	3.6768e+21	3.7708e+21	3.7424e+21	3.7481e+21	3.8282e+21	3.8222e+21	3.8329e+21	3.8275e+21	3.891e+21	3.8385e+21
0.58035	3.5419e+21	3.6254e+21	3.6868e+21	3.7069e+21	3.6504e+21	3.7448e+21	3.689e+21	3.7412e+21	3.7839e+21	3.8277e+21	3.8348e+21	3.8598e+21	3.8634e+21	3.8136e+21
0.583	3.5111e+21	3.5826e+21	3.6492e+21	3.6834e+21	3.6436e+21	3.7311e+21	3.6573e+21	3.7341e+21	3.7727e+21	3.8014e+21	3.8099e+21	3.8677e+21	3.8903e+21	3.8039e+21
0.58565	3.4951e+21	3.5845e+21	3.6339e+21	3.6648e+21	3.6432e+21	3.7054e+21	3.6636e+21	3.708e+21	3.7569e+21	3.7615e+21	3.7961e+21	3.8329e+21	3.9092e+21	3.832e+21
0.5883	3.5021e+21	3.5824e+21	3.6024e+21	3.6734e+21	3.6296e+21	3.6951e+21	3.6841e+21	3.701e+21	3.7404e+21	3.725e+21	3.7894e+21	3.8248e+21	3.8759e+21	3.8548e+21
0.59095	3.4881e+21	3.5792e+21	3.5798e+21	3.6657e+21	3.6301e+21	3.7088e+21	3.675e+21	3.7077e+21	3.6994e+21	3.7245e+21	3.7692e+21	3.8007e+21	3.8576e+21	3.8399e+21
0.5936	3.4982e+21	3.5759e+21	3.5604e+21	3.6792e+21	3.6312e+21	3.692e+21	3.6782e+21	3.6917e+21	3.6888e+21	3.7207e+21	3.7351e+21	3.7925e+21	3.8334e+21	3.8291e+21
0.59625	3.5026e+21	3.5619e+21	3.536e+21	3.6835e+21	3.6187e+21	3.667e+21	3.6631e+21	3.6884e+21	3.692e+21	3.7152e+21	3.7335e+21	3.7917e+21	3.8185e+21	3.8276e+21
0.5989	3.4803e+21	3.5272e+21	3.5349e+21	3.6585e+21	3.6015e+21	3.6555e+21	3.6532e+21	3.6751e+21	3.672e+21	3.7298e+21	3.7493e+21	3.7887e+21	3.7947e+21	3.8223e+21
0.60155	3.4608e+21	3.4867e+21	3.5456e+21	3.6398e+21	3.6051e+21	3.6375e+21	3.6618e+21	3.6921e+21	3.6799e+21	3.7185e+21	3.7336e+21	3.7914e+21	3.7727e+21	3.8003e+21
0.6042	3.4425e+21	3.4669e+21	3.5294e+21	3.6131e+21	3.6099e+21	3.6317e+21	3.6492e+21	3.6943e+21	3.7189e+21	3.6999e+21	3.7249e+21	3.787e+21	3.7474e+21	3.7816e+21
0.60685	3.425e+21	3.4442e+21	3.5101e+21	3.5857e+21	3.5968e+21	3.6222e+21	3.6259e+21	3.6519e+21	3.7073e+21	3.6905e+21	3.7237e+21	3.7706e+21	3.7679e+21	3.7769e+21
0.6095	3.4158e+21	3.419e+21	3.4942e+21	3.5734e+21	3.5691e+21	3.6011e+21	3.6121e+21	3.6229e+21	3.7017e+21	3.6903e+21	3.7512e+21	3.7618e+21	3.777e+21	3.7618e+21
0.61215	3.4385e+21	3.4099e+21	3.4731e+21	3.5419e+21	3.5773e+21	3.5816e+21	3.5943e+21	3.6181e+21	3.662e+21	3.686e+21	3.7643e+21	3.7569e+21	3.7681e+21	3.7574e+21
0.6148	3.4287e+21	3.4314e+21	3.4574e+21	3.5108e+21	3.5716e+21	3.5886e+21	3.5902e+21	3.6158e+21	3.6583e+21	3.6817e+21	3.747e+21	3.7504e+21	3.7654e+21	3.7835e+21
0.61745	3.4049e+21	3.4409e+21	3.4483e+21	3.5088e+21	3.5373e+21	3.5785e+21	3.585e+21	3.6128e+21	3.6549e+21	3.6873e+21	3.7171e+21	3.7263e+21	3.7501e+21	3.7912e+21
0.6201	3.386e+21	3.4221e+21	3.4329e+21	3.4903e+21	3.4943e+21	3.5367e+21	3.573e+21	3.5929e+21	3.6155e+21	3.6661e+21	3.6909e+21	3.7173e+21	3.7246e+21	3.8141e+21
0.62275	3.3832e+21	3.4131e+21	3.4197e+21	3.505e+21	3.4595e+21	3.5272e+21	3.5682e+21	3.5757e+21	3.5831e+21	3.6422e+21	3.6727e+21	3.7094e+21	3.7089e+21	3.776e+21
0.6254	3.3756e+21	3.4179e+21	3.4103e+21	3.5022e+21	3.4719e+21	3.5329e+21	3.5666e+21	3.5534e+21	3.5651e+21	3.6097e+21	3.6368e+21	3.6968e+21	3.6846e+21	3.7551e+21
0.62805	3.3789e+21	3.4294e+21	3.4196e+21	3.4918e+21	3.4757e+21	3.5147e+21	3.5487e+21	3.5474e+21	3.5814e+21	3.5824e+21	3.6173e+21	3.6758e+21	3.6765e+21	3.7375e+21
0.6307	3.3586e+21	3.4393e+21	3.4079e+21	3.5011e+21	3.4821e+21	3.5066e+21	3.5352e+21	3.5564e+21	3.5671e+21	3.5709e+21	3.5965e+21	3.6753e+21	3.6943e+21	3.7292e+21
0.63335	3.3526e+21	3.4139e+21	3.3966e+21	3.4799e+21	3.4846e+21	3.5001e+21	3.5167e+21	3.5572e+21	3.5532e+21	3.5861e+21	3.5851e+21	3.6561e+21	3.6851e+21	3.7184e+21
0.636	3.3525e+21	3.3806e+21	3.3839e+21	3.4834e+21	3.4766e+21	3.4979e+21	3.507e+21	3.5584e+21	3.5429e+21	3.5892e+21	3.5966e+21	3.6462e+21	3.6737e+21	3.6885e+21
0.63865	3.3385e+21	3.3611e+21	3.3462e+21	3.486e+21	3.4771e+21	3.4828e+21	3.5234e+21	3.5723e+21	3.5317e+21	3.5908e+21	3.5744e+21	3.6218e+21	3.6494e+21	3.6977e+21
0.6413	3.3175e+21	3.3601e+21	3.3403e+21	3.4554e+21	3.4818e+21	3.4646e+21	3.5289e+21	3.5834e+21	3.5302e+21	3.5796e+21	3.5755e+21	3.6243e+21	3.6377e+21	3.6982e+21
0.64395	3.31e+21	3.3333e+21	3.3451e+21	3.4117e+21	3.4789e+21	3.458e+21	3.5121e+21	3.5625e+21	3.5312e+21	3.5812e+21	3.5779e+21	3.6262e+21	3.6437e+21	3.6714e+21
0.6466	3.291e+21	3.3253e+21	3.3406e+21	3.3916e+21	3.4728e+21	3.4511e+21	3.4639e+21	3.5215e+21	3.516e+21	3.6129e+21	3.5797e+21	3.6045e+21	3.654e+21	3.6701e+21
0.64925	3.2626e+21	3.3098e+21	3.3208e+21	3.3926e+21	3.4588e+21	3.4197e+21	3.4677e+21	3.5078e+21	3.5213e+21	3.5931e+21	3.5768e+21	3.5922e+21	3.6312e+21	3.6796e+21
0.6519	3.2455e+21	3.3153e+21	3.3214e+21	3.3939e+21	3.429e+21	3.4069e+21	3.4596e+21	3.4961e+21	3.5337e+21	3.54e+21	3.5617e+21	3.5813e+21	3.6093e+21	3.6447e+21
0.65455	3.2285e+21	3.3318e+21	3.3134e+21	3.3837e+21	3.4323e+21	3.4081e+21	3.4619e+21	3.4688e+21	3.5036e+21	3.4978e+21	3.5405e+21	3.5834e+21	3.6106e+21	3.616e+21
0.6572	3.2253e+21	3.3418e+21	3.2987e+21	3.3573e+21	3.4099e+21	3.3997e+21	3.4612e+21	3.4593e+21	3.4766e+21	3.4955e+21	3.5388e+21	3.5656e+21	3.6154e+21	3.6141e+21
0.65985	3.2323e+21	3.3202e+21	3.281e+21	3.3329e+21	3.3882e+21	3.4002e+21	3.4572e+21	3.4441e+21	3.4964e+21	3.5035e+21	3.5248e+21	3.5676e+21	3.6195e+21	3.6172e+21
0.6625	3.2348e+21	3.2988e+21	3.2637e+21	3.3155e+21	3.3801e+21	3.3881e+21	3.4453e+21	3.4297e+21	3.502e+21	3.5025e+21	3.5114e+21	3.5852e+21	3.6088e+21	3.6232e+21
0.66515	3.2382e+21	3.2963e+21	3.2609e+21	3.318e+21	3.365e+21	3.3923e+21	3.4123e+21	3.4041e+21	3.4796e+21	3.4917e+21	3.5067e+21	3.5647e+21	3.5874e+21	3.6335e+21
0.6678	3.2376e+21	3.2956e+21	3.2677e+21	3.3044e+21	3.3541e+21	3.4132e+21	3.3959e+21	3.3589e+21	3.4336e+21	3.4848e+21	3.4885e+21	3.5253e+21	3.5891e+21	3.6306e+21
0.67045	3.2057e+21	3.3023e+21	3.2479e+21	3.3158e+21	3.356e+21	3.4094e+21	3.3881e+21	3.3608e+21	3.4202e+21	3.4805e+21	3.4668e+21	3.4982e+21	3.578e+21	3.6077e+21
0.6731	3.1957e+21	3.2835e+21	3.2251e+21	3.3166e+21	3.3352e+21	3.4185e+21	3.3877e+21	3.3736e+21	3.4164e+21	3.4351e+21	3.4831e+21	3.4931e+21	3.5474e+21	3.5886e+21
0.67575	3.1903e+21	3.2491e+21	3.2403e+21	3.308e+21	3.3147e+21	3.4172e+21	3.3897e+21	3.3698e+21	3.4208e+21	3.4289e+21	3.5042e+21	3.4927e+21	3.521e+21	3.5915e+21
0.6784	3.1876e+21	3.202e+21	3.2328e+21	3.277e+21	3.3108e+21	3.3899e+21	3.3756e+21	3.3815e+21	3.4181e+21	3.4435e+21	3.4721e+21	3.4854e+21	3.5264e+21	3.5941e+21
0.68105	3.188e+21	3.1973e+21	3.2204e+21	3.2821e+21	3.3172e+21	3.3432e+21	3.3559e+21	3.4014e+21	3.4099e+21	3.4485e+21	3.4639e+21	3.4706e+21	3.4995e+21	3.5633e+21
0.6837	3.1831e+21	3.2007e+21	3.1957e+21	3.2679e+21	3.3041e+21	3.2989e+21	3.3256e+21	3.376e+21	3.3959e+21	3.447e+21	3.4669e+21	3.4562e+21	3.4835e+21	3.5446e+21
0.68635	3.1675e+21	3.2042e+21	3.1845e+21	3.2557e+21	3.3027e+21	3.2877e+21	3.3368e+21	3.3601e+21	3.3917e+21	3.4548e+21	3.4681e+21	3.458e+21	3.4903e+21	3.5347e+21
0.689	3.1572e+21	3.1942e+21	3.191e+21	3.2535e+21	3.292e+21	3.2707e+21	3.3358e+21	3.323e+21	3.3904e+21	3.4318e+21	3.4638e+21	3.452e+21	3.488e+21	3.5541e+21
0.69165	3.1554e+21	3.1887e+21	3.1989e+21	3.2699e+21	3.2861e+21	3.2686e+21	3.3215e+21	3.3115e+21	3.3956e+21	3.4183e+21	3.4377e+21	3.4438e+21	3.5006e+21	3.539e+21
0.6943	3.149e+21	3.1907e+21	3.2169e+21	3.2271e+21	3.2684e+21	3.2607e+21	3.2953e+21	3.2583e+21	3.3637e+21	3.4045e+21	3.4252e+21	3.4245e+21	3.512e+21	3.5162e+21
0.69695	3.1334e+21	3.1839e+21	3.1989e+21	3.2003e+21	3.2484e+21	3.2455e+21	3.2648e+21	3.2253e+21	3.3417e+21	3.3806e+21	3.3966e+21	3.4357e+21	3.4989e+21	3.5042e+21
0.6996	3.1409e+21	3.1873e+21	3.164e+21	3.2192e+21	3.2303e+21	3.2319e+21	3.2706e+21	3.2153e+21	3.3409e+21	3.348e+21	3.3635e+21	3.4578e+21	3.4735e+21	3.503e+21
0.70225	3.1215e+21	3.1736e+21	3.1651e+21	3.1998e+21	3.2204e+21	3.1968e+21	3.2774e+21	3.2348e+21	3.3385e+21	3.3347e+21	3.3323e+21	3.4534e+21	3.4452e+21	3.4948e+21
0.7049	3.0909e+21	3.1657e+21	3.1807e+21	3.1843e+21	3.209e+21	3.197e+21	3.2795e+21	3.2204e+21	3.346e+21	3.33e+21	3.3383e+21	3.4115e+21	3.411e+21	3.474e+21
0.70755	3.0867e+21	3.1473e+21	3.1662e+21	3.1838e+21	3.1896e+21	3.1926e+21	3.2596e+21	3.2127e+21	3.3395e+21	3.3326e+21	3.3356e+21	3.3813e+21	3.38e+21	3.444e+21
0.7102	3.0905e+21	3.1536e+21	3.1593e+21	3.1682e+21	3.2027e+21	3.2202e+21	3.2425e+21	3.217e+21	3.3356e+21	3.2968e+21	3.331e+21	3.3897e+21	3.3884e+21	3.4409e+21
0.71285	3.0834e+21	3.1384e+21	3.1262e+21	3.1508e+21	3.2032e+21	3.2044e+21	3.2496e+21	3.2205e+21	3.3138e+21	3.2987e+21	3.3282e+21	3.4016e+21	3.3956e+21	3.4251e+21
0.7155	3.0766e+21	3.1029e+21	3.1116e+21	3.1482e+21	3.204e+21	3.1855e+21	3.2628e+21	3.2172e+21	3.2952e+21	3.298e+21	3.3115e+21	3.4002e+21	3.3722e+21	3.4377e+21
0.71815	3.0422e+21	3.098e+21	3.1165e+21	3.1522e+21	3.2139e+21	3.1762e+21	3.2571e+21	3.1831e+21	3.2876e+21	3.2803e+21	3.2973e+21	3.3881e+21	3.3682e+21	3.463e+21
0.7208	3.0242e+21	3.0868e+21	3.1076e+21	3.157e+21	3.1976e+21	3.1802e+21	3.2379e+21	3.1639e+21	3.2854e+21	3.2889e+21	3.2906e+21	3.3432e+21	3.3656e+21	3.4466e+21
0.72345	3.0162e+21	3.0713e+21	3.0893e+21	3.1219e+21	3.1803e+21	3.149e+21	3.2044e+21	3.1831e+21	3.2762e+21	3.279e+21	3.3021e+21	3.3013e+21	3.3588e+21	3.4018e+21
0.7261	3.0094e+21	3.0727e+21	3.0835e+21	3.101e+21	3.1578e+21	3.1319e+21	3.1824e+21	3.2162e+21	3.2445e+21	3.2902e+21	3.2849e+21	3.3097e+21	3.343e+21	3.3886e+21
0.72875	2.9797e+21	3.0647e+21	3.0552e+21	3.1016e+21	3.144e+21	3.1205e+21	3.1546e+21	3.2134e+21	3.2286e+21	3.282e+21	3.2647e+21	3.3138e+21	3.3427e+21	3.389e+21
0.7314	2.963e+21	3.0653e+21	3.0341e+21	3.0792e+21	3.1451e+21	3.1274e+21	3.1421e+21	3.2062e+21	3.2124e+21	3.2559e+21	3.2688e+21	3.2879e+21	3.3574e+21	3.3988e+21
0.73405	2.9536e+21	3.05e+21	3.0264e+21	3.063e+21	3.1353e+21	3.1195e+21	3.1369e+21	3.1974e+21	3.2023e+21	3.2439e+21	3.2458e+21	3.2803e+21	3.3436e+21	3.4031e+21
0.7367	2.943e+21	3.0271e+21	2.9795e+21	3.0603e+21	3.1079e+21	3.0967e+21	3.128e+21	3.1978e+21	3.1996e+21	3.2289e+21	3.2107e+21	3.2643e+21	3.3356e+21	3.4035e+21
0.73935	2.9297e+21	3.0058e+21	2.9531e+21	3.0283e+21	3.0586e+21	3.0932e+21	3.106e+21	3.191e+21	3.2161e+21	3.2305e+21	3.2037e+21	3.2533e+21	3.3156e+21	3.3962e+21
0.742	2.9277e+21	2.9877e+21	2.958e+21	3.0024e+21	3.0429e+21	3.0839e+21	3.0693e+21	3.1412e+21	3.1933e+21	3.2196e+21	3.2053e+21	3.2402e+21	3.2879e+21	3.3771e+21
0.74465	2.9163e+21	2.9625e+21	2.9586e+21	2.9884e+21	3.0297e+21	3.0714e+21	3.0552e+21	3.1235e+21	3.1847e+21	3.1739e+21	3.1787e+21	3.2402e+21	3.2662e+21	3.3151e+21
0.7473	2.8843e+21	2.9426e+21	2.9591e+21	2.9678e+21	3.0073e+21	3.0629e+21	3.0259e+21	3.0953e+21	3.1628e+21	3.1421e+21	3.1434e+21	3.2445e+21	3.2816e+21	3.2732e+21
0.74995	2.8579e+21	2.915e+21	2.9529e+21	2.9565e+21	2.9818e+21	3.0465e+21	3.0267e+21	3.0547e+21	3.1467e+21	3.1288e+21	3.1411e+21	3.2211e+21	3.3067e+21	3.2682e+21
0.7526	2.8247e+21	2.8817e+21	2.928e+21	2.9428e+21	2.9667e+21	2.9948e+21	3.0162e+21	3.0306e+21	3.0907e+21	3.1219e+21	3.169e+21	3.1794e+21	3.2867e+21	3.2717e+21
0.75525	2.7996e+21	2.8698e+21	2.9156e+21	2.9226e+21	2.9543e+21	2.9801e+21	3.0106e+21	3.0244e+21	3.0719e+21	3.1123e+21	3.154e+21	3.1488e+21	3.2467e+21	3.2661e+21
0.7579	2.7981e+21	2.8593e+21	2.8925e+21	2.9102e+21	2.9367e+21	2.9874e+21	2.9886e+21	3.0263e+21	3.0652e+21	3.113e+21	3.1109e+21	3.1601e+21	3.2336e+21	3.2401e+21
0.76055	2.7847e+21	2.8491e+21	2.8758e+21	2.9108e+21	2.9347e+21	2.9686e+21	2.9982e+21	3.0302e+21	3.0535e+21	3.1188e+21	3.1033e+21	3.1793e+21	3.2207e+21	3.2355e+21
0.7632	2.7764e+21	2.8346e+21	2.859e+21	2.9057e+21	2.9043e+21	2.9513e+21	2.9806e+21	3.0053e+21	3.0441e+21	3.091e+21	3.1019e+21	3.1673e+21	3.2072e+21	3.2025e+21
0.76585	2.7664e+21	2.8337e+21	2.8382e+21	2.863e+21	2.8887e+21	2.9214e+21	2.9481e+21	2.9583e+21	3.0374e+21	3.0662e+21	3.0861e+21	3.133e+21	3.179e+21	3.1677e+21
0.7685	2.758e+21	2.8261e+21	2.8495e+21	2.8294e+21	2.8742e+21	2.9389e+21	2.9233e+21	2.9592e+21	3.0375e+21	3.0578e+21	3.0769e+21	3.1289e+21	3.1793e+21	3.1654e+21
0.77115	2.7503e+21	2.8219e+21	2.826e+21	2.8322e+21	2.8725e+21	2.9156e+21	2.9113e+21	2.9624e+21	3.0206e+21	3.0639e+21	3.1046e+21	3.1247e+21	3.1493e+21	3.179e+21
0.7738	2.7411e+21	2.7891e+21	2.803e+21	2.85e+21	2.8763e+21	2.9049e+21	2.9352e+21	2.9766e+21	3.0325e+21	3.0645e+21	3.0845e+21	3.121e+21	3.1114e+21	3.1915e+21
0.77645	2.7657e+21	2.7729e+21	2.7835e+21	2.8341e+21	2.8696e+21	2.9122e+21	2.9093e+21	2.9696e+21	3.036e+21	3.0322e+21	3.0873e+21	3.1262e+21	3.1434e+21	3.1891e+21
0.7791	2.785e+21	2.7484e+21	2.7825e+21	2.8171e+21	2.8618e+21	2.9033e+21	2.9302e+21	2.9691e+21	3.0223e+21	3.0379e+21	3.0926e+21	3.1193e+21	3.1732e+21	3.1902e+21
0.78175	2.7741e+21	2.7531e+21	2.7926e+21	2.8179e+21	2.8866e+21	2.9046e+21	2.9298e+21	2.9585e+21	3.0034e+21	3.0559e+21	3.0742e+21	3.1223e+21	3.1605e+21	3.1907e+21
0.7844	2.7395e+21	2.7812e+21	2.7883e+21	2.839e+21	2.8984e+21	2.9069e+21	2.9174e+21	2.9349e+21	3.008e+21	3.0621e+21	3.0554e+21	3.1295e+21	3.1617e+21	3.189e+21
0.78705	2.734e+21	2.7872e+21	2.797e+21	2.8161e+21	2.8977e+21	2.9067e+21	2.9192e+21	2.9259e+21	3.002e+21	3.0422e+21	3.0402e+21	3.1353e+21	3.1278e+21	3.1899e+21
0.7897	2.7259e+21	2.777e+21	2.8126e+21	2.7913e+21	2.8645e+21	2.9126e+21	2.9145e+21	2.9002e+21	2.9771e+21	3.0203e+21	3.0323e+21	3.1381e+21	3.1176e+21	3.1786e+21
0.79235	2.7077e+21	2.7638e+21	2.8348e+21	2.7771e+21	2.8542e+21	2.9051e+21	2.919e+21	2.878e+21	2.9441e+21	3.0223e+21	3.0014e+21	3.1392e+21	3.1106e+21	3.1701e+21
0.795	2.6779e+21	2.7537e+21	2.8215e+21	2.7948e+21	2.8632e+21	2.9137e+21	2.9089e+21	2.866e+21	2.9082e+21	3.0452e+21	2.977e+21	3.1061e+21	3.1115e+21	3.1548e+21
0.79765	2.6614e+21	2.7118e+21	2.806e+21	2.8104e+21	2.8474e+21	2.8972e+21	2.9019e+21	2.8669e+21	2.8895e+21	3.0165e+21	2.9753e+21	3.0789e+21	3.115e+21	3.1592e+21
0.8003	2.6417e+21	2.6968e+21	2.7748e+21	2.7943e+21	2.808e+21	2.8891e+21	2.8753e+21	2.8846e+21	2.8928e+21	3.0047e+21	2.975e+21	3.071e+21	3.0804e+21	3.1575e+21
0.80295	2.6393e+21	2.6975e+21	2.7514e+21	2.761e+21	2.7823e+21	2.8675e+21	2.8573e+21	2.8808e+21	2.929e+21	3.0116e+21	2.9656e+21	3.0537e+21	3.0857e+21	3.1621e+21
0.8056	2.6285e+21	2.6836e+21	2.7474e+21	2.7576e+21	2.7755e+21	2.8303e+21	2.8467e+21	2.8724e+21	2.9461e+21	3.0091e+21	2.9668e+21	3.0517e+21	3.0707e+21	3.163e+21
0.80825	2.6195e+21	2.6826e+21	2.7464e+21	2.7483e+21	2.7683e+21	2.8114e+21	2.8652e+21	2.8684e+21	2.9342e+21	2.9983e+21	2.9546e+21	3.0514e+21	3.0735e+21	3.1154e+21
0.8109	2.6215e+21	2.6803e+21	2.7404e+21	2.7394e+21	2.7596e+21	2.7989e+21	2.8598e+21	2.8598e+21	2.9268e+21	3.0095e+21	2.956e+21	3.0657e+21	3.0615e+21	3.084e+21
0.81355	2.6249e+21	2.6629e+21	2.7307e+21	2.7507e+21	2.7612e+21	2.7833e+21	2.8511e+21	2.8594e+21	2.8899e+21	2.9931e+21	2.9576e+21	3.0642e+21	3.0729e+21	3.0943e+21
0.8162	2.6098e+21	2.6563e+21	2.718e+21	2.764e+21	2.7449e+21	2.762e+21	2.8294e+21	2.8435e+21	2.8597e+21	2.9822e+21	2.9461e+21	3.0567e+21	3.0686e+21	3.1196e+21
0.81885	2.6004e+21	2.6628e+21	2.7268e+21	2.7423e+21	2.7423e+21	2.7589e+21	2.8384e+21	2.8543e+21	2.8575e+21	2.9721e+21	2.9256e+21	3.0228e+21	3.0641e+21	3.122e+21
0.8215	2.6048e+21	2.6515e+21	2.7177e+21	2.7303e+21	2.7342e+21	2.7895e+21	2.8521e+21	2.8534e+21	2.8771e+21	2.9549e+21	2.9264e+21	3.0037e+21	3.0571e+21	3.1081e+21
0.82415	2.6078e+21	2.6358e+21	2.6916e+21	2.7172e+21	2.7396e+21	2.7918e+21	2.8412e+21	2.8335e+21	2.8896e+21	2.942e+21	2.9417e+21	2.9875e+21	3.0296e+21	3.1135e+21
0.8268	2.6022e+21	2.6129e+21	2.6686e+21	2.7063e+21	2.746e+21	2.7757e+21	2.8288e+21	2.8387e+21	2.898e+21	2.9306e+21	2.9487e+21	3.008e+21	2.9932e+21	3.1093e+21
0.82945	2.5706e+21	2.5979e+21	2.6588e+21	2.6878e+21	2.7443e+21	2.7569e+21	2.8134e+21	2.8386e+21	2.8892e+21	2.9285e+21	2.9454e+21	3.0142e+21	2.977e+21	3.0913e+21
0.8321	2.5386e+21	2.599e+21	2.6483e+21	2.6765e+21	2.7441e+21	2.7421e+21	2.7946e+21	2.8213e+21	2.8545e+21	2.9255e+21	2.9543e+21	3.0001e+21	2.9913e+21	3.0597e+21
0.83475	2.5466e+21	2.5852e+21	2.6428e+21	2.6598e+21	2.7236e+21	2.7272e+21	2.7793e+21	2.7992e+21	2.8414e+21	2.9032e+21	2.9467e+21	2.9861e+21	3.0063e+21	3.0693e+21
0.8374	2.5513e+21	2.5911e+21	2.6446e+21	2.6436e+21	2.7022e+21	2.7096e+21	2.7785e+21	2.7972e+21	2.8311e+21	2.8953e+21	2.9376e+21	2.9778e+21	3.012e+21	3.0858e+21
0.84005	2.5416e+21	2.5806e+21	2.6319e+21	2.6481e+21	2.7002e+21	2.6905e+21	2.7608e+21	2.7715e+21	2.8167e+21	2.8942e+21	2.924e+21	2.9993e+21	3.0194e+21	3.0778e+21
0.8427	2.5283e+21	2.5609e+21	2.6159e+21	2.6409e+21	2.7244e+21	2.6736e+21	2.7615e+21	2.7622e+21	2.8027e+21	2.9112e+21	2.899e+21	3.0126e+21	3.0215e+21	3.0757e+21
0.84535	2.5405e+21	2.558e+21	2.6075e+21	2.6503e+21	2.7265e+21	2.6701e+21	2.7714e+21	2.7584e+21	2.8215e+21	2.8983e+21	2.9043e+21	2.9963e+21	3e+21	3.0719e+21
0.848	2.5427e+21	2.5387e+21	2.5953e+21	2.6288e+21	2.7004e+21	2.6685e+21	2.7767e+21	2.7322e+21	2.8181e+21	2.8757e+21	2.9111e+21	2.97e+21	2.9534e+21	3.0648e+21
0.85065	2.5288e+21	2.5228e+21	2.5864e+21	2.6127e+21	2.672e+21	2.6452e+21	2.7698e+21	2.7157e+21	2.8042e+21	2.8521e+21	2.9082e+21	2.9555e+21	2.9422e+21	3.0445e+21
0.8533	2.5173e+21	2.4875e+21	2.5662e+21	2.6053e+21	2.6523e+21	2.6161e+21	2.754e+21	2.7228e+21	2.773e+21	2.834e+21	2.88e+21	2.9488e+21	2.9243e+21	3.0348e+21
0.85595	2.4974e+21	2.4855e+21	2.548e+21	2.5847e+21	2.6415e+21	2.5941e+21	2.7428e+21	2.7025e+21	2.7345e+21	2.8203e+21	2.8628e+21	2.9217e+21	2.9095e+21	3.032e+21
0.8586	2.4736e+21	2.5024e+21	2.5473e+21	2.5787e+21	2.6371e+21	2.6031e+21	2.7181e+21	2.7003e+21	2.7393e+21	2.8152e+21	2.8549e+21	2.876e+21	2.9096e+21	3.0163e+21
0.86125	2.4635e+21	2.5057e+21	2.5601e+21	2.5642e+21	2.6192e+21	2.5972e+21	2.6796e+21	2.6925e+21	2.7317e+21	2.809e+21	2.8461e+21	2.8779e+21	2.9084e+21	3.0057e+21
0.8639	2.4754e+21	2.4979e+21	2.5698e+21	2.554e+21	2.613e+21	2.588e+21	2.6634e+21	2.6861e+21	2.729e+21	2.8129e+21	2.8682e+21	2.8763e+21	2.9099e+21	3.0089e+21
0.86655	2.4652e+21	2.4987e+21	2.5768e+21	2.5563e+21	2.619e+21	2.5928e+21	2.6485e+21	2.6699e+21	2.7512e+21	2.7947e+21	2.8662e+21	2.8564e+21	2.9275e+21	3.015e+21
0.8692	2.4583e+21	2.5052e+21	2.5699e+21	2.5755e+21	2.6347e+21	2.5934e+21	2.6739e+21	2.6535e+21	2.7417e+21	2.781e+21	2.8409e+21	2.8521e+21	2.9311e+21	3.0173e+21
0.87185	2.4605e+21	2.4767e+21	2.5707e+21	2.584e+21	2.6365e+21	2.5949e+21	2.6992e+21	2.6704e+21	2.7223e+21	2.7807e+21	2.8322e+21	2.8516e+21	2.9137e+21	3.025e+21
0.8745	2.4384e+21	2.4625e+21	2.5344e+21	2.5548e+21	2.6516e+21	2.6023e+21	2.7028e+21	2.673e+21	2.7157e+21	2.7642e+21	2.8129e+21	2.8563e+21	2.9105e+21	3.0341e+21
0.87715	2.4375e+21	2.4679e+21	2.5045e+21	2.5403e+21	2.6294e+21	2.5951e+21	2.6769e+21	2.6915e+21	2.7157e+21	2.7557e+21	2.7985e+21	2.8364e+21	2.8773e+21	3.0294e+21
0.8798	2.4637e+21	2.4645e+21	2.485e+21	2.5407e+21	2.6033e+21	2.6211e+21	2.6575e+21	2.6949e+21	2.7041e+21	2.7454e+21	2.7927e+21	2.8264e+21	2.8513e+21	3.0045e+21
0.88245	2.4441e+21	2.4484e+21	2.4941e+21	2.5166e+21	2.5963e+21	2.6067e+21	2.662e+21	2.6872e+21	2.7075e+21	2.7689e+21	2.7779e+21	2.8268e+21	2.854e+21	2.9733e+21
0.8851	2.4419e+21	2.4415e+21	2.4807e+21	2.4988e+21	2.6021e+21	2.5884e+21	2.6559e+21	2.6778e+21	2.7297e+21	2.7676e+21	2.7555e+21	2.8323e+21	2.8572e+21	2.9404e+21
0.88775	2.4295e+21	2.4435e+21	2.4762e+21	2.4938e+21	2.579e+21	2.577e+21	2.6529e+21	2.6647e+21	2.7253e+21	2.7648e+21	2.7555e+21	2.8705e+21	2.8581e+21	2.9313e+21
0.8904	2.4096e+21	2.464e+21	2.5033e+21	2.493e+21	2.5666e+21	2.5683e+21	2.666e+21	2.6451e+21	2.6784e+21	2.7626e+21	2.7688e+21	2.8516e+21	2.8727e+21	2.9341e+21
0.89305	2.3905e+21	2.4419e+21	2.4806e+21	2.4943e+21	2.5627e+21	2.5465e+21	2.6699e+21	2.6458e+21	2.6472e+21	2.727e+21	2.7353e+21	2.8351e+21	2.8619e+21	2.9505e+21
0.8957	2.3691e+21	2.4248e+21	2.4709e+21	2.5037e+21	2.526e+21	2.5526e+21	2.6613e+21	2.632e+21	2.6533e+21	2.7027e+21	2.7212e+21	2.8253e+21	2.8489e+21	2.9411e+21
0.89835	2.3599e+21	2.4198e+21	2.4679e+21	2.4973e+21	2.5186e+21	2.5439e+21	2.6221e+21	2.6216e+21	2.6397e+21	2.7217e+21	2.7141e+21	2.8131e+21	2.8493e+21	2.9591e+21
0.901	2.3548e+21	2.4078e+21	2.4578e+21	2.4748e+21	2.5324e+21	2.5428e+21	2.6006e+21	2.6061e+21	2.6421e+21	2.7198e+21	2.7362e+21	2.8008e+21	2.8107e+21	2.9512e+21
0.90365	2.3397e+21	2.4007e+21	2.4454e+21	2.4418e+21	2.5311e+21	2.5448e+21	2.5991e+21	2.599e+21	2.637e+21	2.7011e+21	2.7274e+21	2.7979e+21	2.7977e+21	2.8955e+21
0.9063	2.3165e+21	2.3959e+21	2.446e+21	2.4235e+21	2.5177e+21	2.5341e+21	2.5812e+21	2.6033e+21	2.6158e+21	2.6658e+21	2.7219e+21	2.7999e+21	2.8158e+21	2.8685e+21
0.90895	2.3121e+21	2.3618e+21	2.4284e+21	2.429e+21	2.5154e+21	2.5229e+21	2.575e+21	2.6146e+21	2.5864e+21	2.6367e+21	2.6896e+21	2.7733e+21	2.8128e+21	2.8888e+21
0.9116	2.3054e+21	2.3552e+21	2.4059e+21	2.4135e+21	2.5109e+21	2.5121e+21	2.5668e+21	2.6032e+21	2.5898e+21	2.6394e+21	2.6864e+21	2.7599e+21	2.7978e+21	2.9094e+21
0.91425	2.2975e+21	2.3679e+21	2.3954e+21	2.4144e+21	2.5011e+21	2.5122e+21	2.5459e+21	2.5905e+21	2.5763e+21	2.6395e+21	2.6713e+21	2.7615e+21	2.7586e+21	2.9066e+21
0.9169	2.2887e+21	2.3641e+21	2.3917e+21	2.4209e+21	2.5036e+21	2.508e+21	2.515e+21	2.5799e+21	2.5863e+21	2.6443e+21	2.6799e+21	2.7704e+21	2.7617e+21	2.8753e+21
0.91955	2.2528e+21	2.3531e+21	2.3669e+21	2.4207e+21	2.5049e+21	2.5013e+21	2.4902e+21	2.5663e+21	2.581e+21	2.6556e+21	2.7003e+21	2.7742e+21	2.7977e+21	2.8677e+21
0.9222	2.2385e+21	2.3365e+21	2.3717e+21	2.4094e+21	2.48e+21	2.4935e+21	2.5096e+21	2.5566e+21	2.5583e+21	2.6359e+21	2.6817e+21	2.7515e+21	2.8083e+21	2.8605e+21
0.92485	2.2488e+21	2.3362e+21	2.3787e+21	2.4003e+21	2.4569e+21	2.4982e+21	2.4968e+21	2.5335e+21	2.5535e+21	2.6279e+21	2.6724e+21	2.733e+21	2.7979e+21	2.8686e+21
0.9275	2.2499e+21	2.3403e+21	2.3696e+21	2.3914e+21	2.4495e+21	2.497e+21	2.4776e+21	2.5199e+21	2.5231e+21	2.637e+21	2.6728e+21	2.7407e+21	2.7612e+21	2.8812e+21
0.93015	2.2345e+21	2.3121e+21	2.3589e+21	2.3896e+21	2.4535e+21	2.4788e+21	2.4641e+21	2.5081e+21	2.4978e+21	2.6502e+21	2.6459e+21	2.7139e+21	2.7598e+21	2.8851e+21
0.9328	2.2526e+21	2.2733e+21	2.3548e+21	2.3843e+21	2.4355e+21	2.4684e+21	2.477e+21	2.4971e+21	2.5098e+21	2.6356e+21	2.6291e+21	2.717e+21	2.7494e+21	2.8727e+21
0.93545	2.2639e+21	2.2807e+21	2.3284e+21	2.3609e+21	2.4375e+21	2.441e+21	2.4893e+21	2.4922e+21	2.5232e+21	2.6093e+21	2.6373e+21	2.7288e+21	2.7674e+21	2.8559e+21
0.9381	2.254e+21	2.2647e+21	2.3086e+21	2.336e+21	2.441e+21	2.4243e+21	2.4807e+21	2.4831e+21	2.5234e+21	2.5997e+21	2.6442e+21	2.7103e+21	2.7715e+21	2.8333e+21
0.94075	2.24e+21	2.2589e+21	2.3036e+21	2.3251e+21	2.4264e+21	2.4339e+21	2.4415e+21	2.4784e+21	2.5224e+21	2.584e+21	2.6356e+21	2.6876e+21	2.7546e+21	2.816e+21
0.9434	2.22e+21	2.2565e+21	2.3153e+21	2.333e+21	2.3999e+21	2.4289e+21	2.4373e+21	2.4826e+21	2.5229e+21	2.5717e+21	2.6235e+21	2.6629e+21	2.7532e+21	2.8132e+21
0.94605	2.1909e+21	2.2355e+21	2.3071e+21	2.3171e+21	2.3964e+21	2.415e+21	2.433e+21	2.4946e+21	2.528e+21	2.5696e+21	2.5987e+21	2.667e+21	2.7511e+21	2.7992e+21
0.9487	2.1738e+21	2.2331e+21	2.2887e+21	2.3298e+21	2.416e+21	2.4251e+21	2.4324e+21	2.5015e+21	2.5264e+21	2.5789e+21	2.6086e+21	2.6745e+21	2.7429e+21	2.7997e+21
0.95135	2.1705e+21	2.2149e+21	2.2952e+21	2.333e+21	2.4176e+21	2.4395e+21	2.439e+21	2.4772e+21	2.5118e+21	2.5658e+21	2.6165e+21	2.6764e+21	2.726e+21	2.8019e+21
0.954	2.1709e+21	2.2134e+21	2.2949e+21	2.3105e+21	2.4125e+21	2.4153e+21	2.4374e+21	2.4674e+21	2.4979e+21	2.5552e+21	2.6104e+21	2.6507e+21	2.7312e+21	2.8077e+21
0.95665	2.1744e+21	2.2295e+21	2.2809e+21	2.2983e+21	2.386e+21	2.4049e+21	2.4255e+21	2.4551e+21	2.4922e+21	2.5394e+21	2.6021e+21	2.6255e+21	2.7296e+21	2.7865e+21
0.9593	2.1727e+21	2.2347e+21	2.271e+21	2.297e+21	2.3763e+21	2.3865e+21	2.4027e+21	2.4288e+21	2.4765e+21	2.5299e+21	2.5923e+21	2.6242e+21	2.7357e+21	2.7665e+21
0.96195	2.1816e+21	2.2426e+21	2.2831e+21	2.3172e+21	2.3387e+21	2.3843e+21	2.4071e+21	2.4115e+21	2.4862e+21	2.5221e+21	2.5741e+21	2.6401e+21	2.7101e+21	2.7458e+21
0.9646	2.1697e+21	2.2378e+21	2.2808e+21	2.3102e+21	2.3133e+21	2.3683e+21	2.422e+21	2.4061e+21	2.4813e+21	2.4965e+21	2.5474e+21	2.6354e+21	2.6855e+21	2.7459e+21
0.96725	2.1557e+21	2.2369e+21	2.2828e+21	2.2877e+21	2.3225e+21	2.359e+21	2.4165e+21	2.4188e+21	2.4606e+21	2.4918e+21	2.562e+21	2.6308e+21	2.689e+21	2.7549e+21
0.9699	2.1579e+21	2.2299e+21	2.2719e+21	2.2831e+21	2.33e+21	2.3463e+21	2.3857e+21	2.4018e+21	2.4386e+21	2.4807e+21	2.5684e+21	2.6251e+21	2.7085e+21	2.7574e+21
0.97255	2.1747e+21	2.2259e+21	2.2678e+21	2.2971e+21	2.3314e+21	2.3524e+21	2.3683e+21	2.3961e+21	2.4222e+21	2.5084e+21	2.579e+21	2.6337e+21	2.7257e+21	2.7657e+21
0.9752	2.1806e+21	2.2097e+21	2.291e+21	2.3006e+21	2.337e+21	2.3679e+21	2.3598e+21	2.4139e+21	2.4157e+21	2.5073e+21	2.5624e+21	2.6382e+21	2.7202e+21	2.7632e+21
0.97785	2.1695e+21	2.208e+21	2.3061e+21	2.2986e+21	2.3433e+21	2.3702e+21	2.3834e+21	2.4332e+21	2.4426e+21	2.5136e+21	2.5497e+21	2.6527e+21	2.7145e+21	2.7713e+21
0.9805	2.1738e+21	2.2243e+21	2.301e+21	2.3009e+21	2.3282e+21	2.3564e+21	2.4201e+21	2.4381e+21	2.4574e+21	2.5064e+21	2.5624e+21	2.6594e+21	2.6984e+21	2.7525e+21
0.98315	2.1674e+21	2.2255e+21	2.2973e+21	2.2878e+21	2.3171e+21	2.3524e+21	2.4067e+21	2.4188e+21	2.4549e+21	2.5012e+21	2.5503e+21	2.6721e+21	2.6863e+21	2.7448e+21
0.9858	2.1693e+21	2.223e+21	2.2814e+21	2.2839e+21	2.3128e+21	2.3464e+21	2.389e+21	2.4176e+21	2.4672e+21	2.5127e+21	2.5554e+21	2.6733e+21	2.6648e+21	2.7501e+21
0.98845	2.1509e+21	2.2104e+21	2.2715e+21	2.296e+21	2.3157e+21	2.3129e+21	2.3868e+21	2.4121e+21	2.4615e+21	2.5044e+21	2.5554e+21	2.6623e+21	2.6399e+21	2.755e+21
0.9911	2.1343e+21	2.1862e+21	2.2534e+21	2.2958e+21	2.2949e+21	2.3117e+21	2.3833e+21	2.3976e+21	2.4433e+21	2.5011e+21	2.5427e+21	2.6268e+21	2.6333e+21	2.7799e+21
0.99375	2.1023e+21	2.1855e+21	2.2368e+21	2.2737e+21	2.3093e+21	2.3008e+21	2.3845e+21	2.394e+21	2.428e+21	2.5125e+21	2.5398e+21	2.609e+21	2.6104e+21	2.7817e+21
0.9964	2.1044e+21	2.1718e+21	2.2297e+21	2.2733e+21	2.3098e+21	2.3151e+21	2.3935e+21	2.3742e+21	2.4193e+21	2.5026e+21	2.5276e+21	2.599e+21	2.6227e+21	2.7707e+21
0.99905	2.0977e+21	2.1641e+21	2.2222e+21	2.2468e+21	2.2983e+21	2.3327e+21	2.4057e+21	2.3548e+21	2.4096e+21	2.4792e+21	2.4993e+21	2.6069e+21	2.6281e+21	2.7545e+21
1.0017	2.0844e+21	2.1701e+21	2.2064e+21	2.2157e+21	2.2836e+21	2.3422e+21	2.4079e+21	2.3494e+21	2.4232e+21	2.4826e+21	2.4828e+21	2.6002e+21	2.6286e+21	2.7269e+21
1.00435	2.0754e+21	2.1515e+21	2.2101e+21	2.1932e+21	2.2751e+21	2.3198e+21	2.3874e+21	2.3484e+21	2.4168e+21	2.48e+21	2.483e+21	2.6003e+21	2.6311e+21	2.7207e+21
1.007	2.0931e+21	2.1496e+21	2.1983e+21	2.1995e+21	2.2433e+21	2.3137e+21	2.3521e+21	2.3442e+21	2.3907e+21	2.496e+21	2.5092e+21	2.5987e+21	2.6211e+21	2.7293e+21
1.00965	2.0846e+21	2.1356e+21	2.1795e+21	2.2145e+21	2.2208e+21	2.2964e+21	2.3492e+21	2.329e+21	2.3691e+21	2.4885e+21	2.5134e+21	2.6039e+21	2.6086e+21	2.741e+21
1.0123	2.0764e+21	2.1518e+21	2.1577e+21	2.2206e+21	2.2382e+21	2.2972e+21	2.358e+21	2.3255e+21	2.3628e+21	2.4721e+21	2.505e+21	2.5972e+21	2.6012e+21	2.7555e+21
1.01495	2.0781e+21	2.1536e+21	2.145e+21	2.2127e+21	2.253e+21	2.3064e+21	2.3603e+21	2.3402e+21	2.3538e+21	2.4483e+21	2.5173e+21	2.6124e+21	2.6307e+21	2.7635e+21
1.0176	2.0982e+21	2.1615e+21	2.1655e+21	2.1837e+21	2.263e+21	2.3086e+21	2.337e+21	2.3428e+21	2.3623e+21	2.434e+21	2.5119e+21	2.6151e+21	2.6539e+21	2.7566e+21
1.02025	2.107e+21	2.1582e+21	2.186e+21	2.1818e+21	2.257e+21	2.3007e+21	2.3143e+21	2.3555e+21	2.3745e+21	2.4186e+21	2.4957e+21	2.5967e+21	2.6471e+21	2.7503e+21
1.0229	2.0984e+21	2.1552e+21	2.1828e+21	2.1919e+21	2.2494e+21	2.2774e+21	2.3205e+21	2.368e+21	2.3751e+21	2.4228e+21	2.4817e+21	2.5691e+21	2.6343e+21	2.7517e+21
1.02555	2.0857e+21	2.1502e+21	2.173e+21	2.1939e+21	2.2554e+21	2.2759e+21	2.3259e+21	2.3614e+21	2.3816e+21	2.4335e+21	2.4886e+21	2.5467e+21	2.6258e+21	2.7376e+21
1.0282	2.0944e+21	2.1532e+21	2.1666e+21	2.1696e+21	2.2457e+21	2.3018e+21	2.2995e+21	2.349e+21	2.3771e+21	2.4353e+21	2.4738e+21	2.532e+21	2.6477e+21	2.705e+21
1.03085	2.0586e+21	2.1395e+21	2.1732e+21	2.1664e+21	2.2151e+21	2.3097e+21	2.2805e+21	2.3338e+21	2.371e+21	2.4434e+21	2.4639e+21	2.5226e+21	2.6239e+21	2.695e+21
1.0335	2.0444e+21	2.1211e+21	2.1802e+21	2.1605e+21	2.2069e+21	2.2788e+21	2.2949e+21	2.3095e+21	2.372e+21	2.4362e+21	2.438e+21	2.5135e+21	2.6029e+21	2.7045e+21
1.03615	2.0395e+21	2.1136e+21	2.1735e+21	2.1632e+21	2.2382e+21	2.2637e+21	2.3129e+21	2.3138e+21	2.3802e+21	2.4324e+21	2.426e+21	2.514e+21	2.6016e+21	2.7018e+21
1.0388	2.0489e+21	2.1215e+21	2.1653e+21	2.1737e+21	2.2543e+21	2.2934e+21	2.3211e+21	2.2955e+21	2.3878e+21	2.4357e+21	2.442e+21	2.5203e+21	2.5967e+21	2.6929e+21
1.04145	2.0655e+21	2.1271e+21	2.1662e+21	2.177e+21	2.2502e+21	2.2894e+21	2.3287e+21	2.2963e+21	2.3743e+21	2.4221e+21	2.4379e+21	2.4986e+21	2.5919e+21	2.6643e+21
1.0441	2.0805e+21	2.1074e+21	2.1749e+21	2.1784e+21	2.2261e+21	2.2472e+21	2.335e+21	2.3061e+21	2.3877e+21	2.4138e+21	2.4223e+21	2.4996e+21	2.5865e+21	2.669e+21
1.04675	2.0814e+21	2.0934e+21	2.1694e+21	2.1529e+21	2.2088e+21	2.2316e+21	2.3131e+21	2.295e+21	2.3936e+21	2.4231e+21	2.4126e+21	2.5128e+21	2.6009e+21	2.6847e+21
1.0494	2.0707e+21	2.1055e+21	2.154e+21	2.1299e+21	2.2184e+21	2.2423e+21	2.2855e+21	2.2751e+21	2.3631e+21	2.4366e+21	2.4384e+21	2.5084e+21	2.5658e+21	2.6722e+21
1.05205	2.0713e+21	2.1159e+21	2.153e+21	2.137e+21	2.2037e+21	2.2467e+21	2.2693e+21	2.2623e+21	2.3409e+21	2.4343e+21	2.4327e+21	2.5085e+21	2.5412e+21	2.6815e+21
1.0547	2.0787e+21	2.1182e+21	2.1288e+21	2.1358e+21	2.2046e+21	2.2433e+21	2.259e+21	2.2514e+21	2.3187e+21	2.4139e+21	2.4083e+21	2.511e+21	2.5452e+21	2.6779e+21
1.05735	2.0662e+21	2.123e+21	2.1173e+21	2.1473e+21	2.2201e+21	2.2427e+21	2.2768e+21	2.2408e+21	2.3134e+21	2.4197e+21	2.424e+21	2.5101e+21	2.5761e+21	2.6778e+21
1.06	2.0514e+21	2.0948e+21	2.1081e+21	2.1585e+21	2.2085e+21	2.2354e+21	2.2688e+21	2.2393e+21	2.3209e+21	2.423e+21	2.4304e+21	2.4941e+21	2.5985e+21	2.6919e+21
1.06265	2.0426e+21	2.0944e+21	2.1231e+21	2.1718e+21	2.1942e+21	2.2448e+21	2.2737e+21	2.2507e+21	2.327e+21	2.4128e+21	2.4408e+21	2.4649e+21	2.5778e+21	2.7177e+21
1.0653	2.0453e+21	2.1057e+21	2.1104e+21	2.1486e+21	2.1901e+21	2.234e+21	2.2701e+21	2.2572e+21	2.3321e+21	2.3949e+21	2.4431e+21	2.4708e+21	2.5658e+21	2.7175e+21
1.06795	2.0683e+21	2.1116e+21	2.0971e+21	2.1276e+21	2.1783e+21	2.2148e+21	2.2679e+21	2.2572e+21	2.3278e+21	2.3855e+21	2.4316e+21	2.4647e+21	2.5706e+21	2.7182e+21
1.0706	2.0641e+21	2.1066e+21	2.1046e+21	2.1172e+21	2.1552e+21	2.2185e+21	2.2821e+21	2.2772e+21	2.3235e+21	2.4054e+21	2.4228e+21	2.4649e+21	2.5762e+21	2.7183e+21
1.07325	2.0571e+21	2.0861e+21	2.1098e+21	2.1261e+21	2.1454e+21	2.2186e+21	2.2858e+21	2.2684e+21	2.3273e+21	2.3967e+21	2.4462e+21	2.4542e+21	2.564e+21	2.7238e+21
1.0759	2.0398e+21	2.0662e+21	2.0937e+21	2.1363e+21	2.148e+21	2.1974e+21	2.2698e+21	2.2616e+21	2.3535e+21	2.4045e+21	2.4422e+21	2.465e+21	2.5537e+21	2.716e+21
1.07855	2.0265e+21	2.0724e+21	2.0704e+21	2.1107e+21	2.1474e+21	2.1751e+21	2.2592e+21	2.2701e+21	2.3466e+21	2.4131e+21	2.4531e+21	2.4525e+21	2.5466e+21	2.6836e+21
1.0812	2.0097e+21	2.0569e+21	2.078e+21	2.1126e+21	2.1434e+21	2.1692e+21	2.251e+21	2.2578e+21	2.3166e+21	2.3931e+21	2.4567e+21	2.4547e+21	2.5349e+21	2.6685e+21
1.08385	2.0148e+21	2.0423e+21	2.0837e+21	2.111e+21	2.1273e+21	2.1669e+21	2.2559e+21	2.2344e+21	2.2909e+21	2.3776e+21	2.4467e+21	2.4603e+21	2.5233e+21	2.6678e+21
1.0865	2.0279e+21	2.0537e+21	2.073e+21	2.0934e+21	2.1211e+21	2.1619e+21	2.2253e+21	2.2297e+21	2.2738e+21	2.3582e+21	2.4218e+21	2.4623e+21	2.5328e+21	2.6658e+21
1.08915	2.032e+21	2.0763e+21	2.0668e+21	2.0798e+21	2.1301e+21	2.1574e+21	2.2153e+21	2.233e+21	2.2623e+21	2.3634e+21	2.3925e+21	2.4332e+21	2.5291e+21	2.6683e+21
1.0918	2.0429e+21	2.09e+21	2.0775e+21	2.0819e+21	2.1319e+21	2.1523e+21	2.2218e+21	2.2297e+21	2.2544e+21	2.3859e+21	2.379e+21	2.4361e+21	2.5075e+21	2.6498e+21
1.09445	2.0474e+21	2.073e+21	2.0605e+21	2.0719e+21	2.1118e+21	2.1346e+21	2.2091e+21	2.2348e+21	2.2398e+21	2.3798e+21	2.3654e+21	2.4517e+21	2.5163e+21	2.6409e+21
1.0971	2.001e+21	2.0564e+21	2.0403e+21	2.0854e+21	2.1058e+21	2.139e+21	2.1983e+21	2.2248e+21	2.2453e+21	2.3518e+21	2.3622e+21	2.4299e+21	2.5108e+21	2.6279e+21
1.09975	1.9667e+21	2.0623e+21	2.0494e+21	2.0872e+21	2.0965e+21	2.1387e+21	2.1967e+21	2.2045e+21	2.2335e+21	2.3344e+21	2.3765e+21	2.4096e+21	2.5111e+21	2.5997e+21
1.1024	1.9561e+21	2.05e+21	2.0488e+21	2.0847e+21	2.1076e+21	2.1337e+21	2.1826e+21	2.2273e+21	2.2346e+21	2.3355e+21	2.3651e+21	2.4057e+21	2.4926e+21	2.5781e+21
1.10505	1.9655e+21	2.0171e+21	2.0551e+21	2.0727e+21	2.0942e+21	2.1283e+21	2.1768e+21	2.2238e+21	2.2383e+21	2.3454e+21	2.3489e+21	2.4021e+21	2.4895e+21	2.5636e+21
1.1077	1.9583e+21	2.0115e+21	2.0614e+21	2.0695e+21	2.093e+21	2.1182e+21	2.1713e+21	2.2246e+21	2.2444e+21	2.3351e+21	2.3267e+21	2.3952e+21	2.4928e+21	2.5522e+21
1.11035	1.9718e+21	2.0052e+21	2.0656e+21	2.0655e+21	2.0992e+21	2.1e+21	2.1737e+21	2.2164e+21	2.2492e+21	2.3217e+21	2.3405e+21	2.401e+21	2.4696e+21	2.5542e+21
1.113	2.0024e+21	1.9853e+21	2.0573e+21	2.0416e+21	2.0975e+21	2.0928e+21	2.1624e+21	2.2028e+21	2.2309e+21	2.3098e+21	2.3359e+21	2.4126e+21	2.4422e+21	2.5465e+21
1.11565	1.9727e+21	1.9782e+21	2.0281e+21	2.0248e+21	2.1006e+21	2.0772e+21	2.1506e+21	2.2009e+21	2.2546e+21	2.297e+21	2.3191e+21	2.4129e+21	2.4245e+21	2.5315e+21
1.1183	1.9691e+21	1.991e+21	2.0109e+21	1.9985e+21	2.1024e+21	2.0846e+21	2.136e+21	2.1739e+21	2.2646e+21	2.2891e+21	2.3264e+21	2.3876e+21	2.4379e+21	2.5277e+21
1.12095	1.9627e+21	1.9796e+21	1.9872e+21	1.9861e+21	2.0874e+21	2.0678e+21	2.1165e+21	2.1743e+21	2.2393e+21	2.2592e+21	2.3378e+21	2.3687e+21	2.4363e+21	2.5297e+21
1.1236	1.9354e+21	1.9779e+21	1.9692e+21	1.9936e+21	2.0853e+21	2.0267e+21	2.1019e+21	2.1669e+21	2.212e+21	2.2353e+21	2.3137e+21	2.358e+21	2.4338e+21	2.5199e+21
1.12625	1.9121e+21	1.9628e+21	1.9524e+21	1.9887e+21	2.0579e+21	1.9989e+21	2.0953e+21	2.1337e+21	2.1933e+21	2.241e+21	2.2902e+21	2.3432e+21	2.4447e+21	2.5118e+21
1.1289	1.8762e+21	1.9315e+21	1.9431e+21	1.9837e+21	2.0065e+21	1.9932e+21	2.0765e+21	2.1151e+21	2.1673e+21	2.2548e+21	2.2791e+21	2.3367e+21	2.4413e+21	2.5012e+21
1.13155	1.8415e+21	1.8985e+21	1.9312e+21	1.9713e+21	1.9859e+21	1.9837e+21	2.0461e+21	2.1092e+21	2.1491e+21	2.2357e+21	2.2894e+21	2.3467e+21	2.4241e+21	2.5044e+21
1.1342	1.8434e+21	1.8791e+21	1.9282e+21	1.9667e+21	1.982e+21	1.9783e+21	2.0385e+21	2.1084e+21	2.1571e+21	2.2486e+21	2.3085e+21	2.3591e+21	2.419e+21	2.5275e+21
1.13685	1.8407e+21	1.8756e+21	1.936e+21	1.9912e+21	1.9759e+21	2.0077e+21	2.0468e+21	2.1101e+21	2.1533e+21	2.2533e+21	2.3181e+21	2.3661e+21	2.4346e+21	2.5695e+21
1.1395	1.8499e+21	1.8718e+21	1.9442e+21	1.9892e+21	1.9942e+21	2.0079e+21	2.0469e+21	2.1251e+21	2.15e+21	2.2439e+21	2.3147e+21	2.3427e+21	2.4631e+21	2.5735e+21
1.14215	1.863e+21	1.8626e+21	1.9396e+21	1.9839e+21	2.0098e+21	2.0093e+21	2.038e+21	2.1113e+21	2.1383e+21	2.2171e+21	2.2913e+21	2.3129e+21	2.4613e+21	2.5738e+21
1.1448	1.8458e+21	1.8511e+21	1.9087e+21	1.9698e+21	2.0001e+21	2.0212e+21	2.0321e+21	2.0873e+21	2.1208e+21	2.2134e+21	2.2765e+21	2.2967e+21	2.4386e+21	2.5644e+21
1.14745	1.8053e+21	1.8273e+21	1.8698e+21	1.9239e+21	1.996e+21	1.9879e+21	2.0378e+21	2.0617e+21	2.125e+21	2.2079e+21	2.2647e+21	2.2932e+21	2.4251e+21	2.5458e+21
1.1501	1.7721e+21	1.8065e+21	1.8345e+21	1.884e+21	1.9659e+21	1.9482e+21	2.0301e+21	2.0318e+21	2.1518e+21	2.2063e+21	2.2435e+21	2.2969e+21	2.417e+21	2.5607e+21
1.15275	1.7511e+21	1.7849e+21	1.8247e+21	1.8648e+21	1.939e+21	1.9191e+21	2.0213e+21	2.0199e+21	2.1497e+21	2.224e+21	2.2543e+21	2.302e+21	2.4182e+21	2.5601e+21
1.1554	1.741e+21	1.7784e+21	1.8335e+21	1.8558e+21	1.9176e+21	1.9044e+21	2.0157e+21	2.0399e+21	2.1577e+21	2.2069e+21	2.2629e+21	2.3283e+21	2.4198e+21	2.5601e+21
1.15805	1.7511e+21	1.7708e+21	1.8346e+21	1.8506e+21	1.916e+21	1.9108e+21	2.0113e+21	2.0518e+21	2.1387e+21	2.1897e+21	2.2715e+21	2.3596e+21	2.4216e+21	2.5397e+21
1.1607	1.7634e+21	1.7588e+21	1.8342e+21	1.8357e+21	1.91e+21	1.9083e+21	2.0193e+21	2.046e+21	2.1169e+21	2.1831e+21	2.2694e+21	2.3614e+21	2.4189e+21	2.5135e+21
1.16335	1.7329e+21	1.7587e+21	1.8206e+21	1.8417e+21	1.9038e+21	1.9114e+21	1.9993e+21	2.0351e+21	2.1056e+21	2.1681e+21	2.2605e+21	2.3416e+21	2.4194e+21	2.5266e+21
1.166	1.6969e+21	1.7493e+21	1.8124e+21	1.8357e+21	1.9044e+21	1.9152e+21	1.9832e+21	2.003e+21	2.0931e+21	2.1404e+21	2.2398e+21	2.3126e+21	2.3972e+21	2.5009e+21
1.16865	1.6703e+21	1.7159e+21	1.7988e+21	1.8061e+21	1.891e+21	1.9262e+21	1.9712e+21	1.983e+21	2.0622e+21	2.128e+21	2.2249e+21	2.3157e+21	2.3841e+21	2.465e+21
1.1713	1.6436e+21	1.6821e+21	1.7752e+21	1.7987e+21	1.8704e+21	1.902e+21	1.9741e+21	1.9767e+21	2.0369e+21	2.1294e+21	2.2241e+21	2.3085e+21	2.3802e+21	2.4714e+21
1.17395	1.6267e+21	1.6498e+21	1.749e+21	1.7652e+21	1.8396e+21	1.874e+21	1.9591e+21	1.9671e+21	2.0274e+21	2.1197e+21	2.2103e+21	2.2959e+21	2.3606e+21	2.4651e+21
1.1766	1.629e+21	1.6258e+21	1.7284e+21	1.767e+21	1.828e+21	1.8645e+21	1.9362e+21	1.9486e+21	2.0128e+21	2.1279e+21	2.1849e+21	2.2657e+21	2.3335e+21	2.4526e+21
1.17925	1.6018e+21	1.6266e+21	1.7074e+21	1.7593e+21	1.8189e+21	1.8482e+21	1.9254e+21	1.9377e+21	1.9994e+21	2.1147e+21	2.1823e+21	2.2534e+21	2.3166e+21	2.4349e+21
1.1819	1.5871e+21	1.6067e+21	1.6804e+21	1.7445e+21	1.8133e+21	1.8261e+21	1.9127e+21	1.9582e+21	1.9787e+21	2.0929e+21	2.1829e+21	2.2628e+21	2.3093e+21	2.4265e+21
1.18455	1.5775e+21	1.5881e+21	1.6659e+21	1.7341e+21	1.8151e+21	1.8032e+21	1.9117e+21	1.9453e+21	1.9641e+21	2.0881e+21	2.1723e+21	2.2571e+21	2.3009e+21	2.4264e+21
1.1872	1.5605e+21	1.5776e+21	1.6426e+21	1.7102e+21	1.808e+21	1.7956e+21	1.9097e+21	1.9343e+21	1.9809e+21	2.085e+21	2.1625e+21	2.264e+21	2.3153e+21	2.446e+21
1.18985	1.5405e+21	1.5686e+21	1.6137e+21	1.692e+21	1.8155e+21	1.7714e+21	1.8956e+21	1.9326e+21	1.9874e+21	2.0487e+21	2.1514e+21	2.2536e+21	2.3155e+21	2.4398e+21
1.1925	1.5008e+21	1.5489e+21	1.5818e+21	1.6806e+21	1.7611e+21	1.7548e+21	1.8606e+21	1.9045e+21	1.9815e+21	1.9992e+21	2.1292e+21	2.2267e+21	2.2919e+21	2.4126e+21
1.19515	1.4764e+21	1.5252e+21	1.553e+21	1.6588e+21	1.7108e+21	1.73e+21	1.8246e+21	1.8837e+21	1.9563e+21	1.9849e+21	2.1033e+21	2.2245e+21	2.2769e+21	2.3755e+21
1.1978	1.4585e+21	1.4841e+21	1.5364e+21	1.6145e+21	1.6657e+21	1.7128e+21	1.7809e+21	1.8347e+21	1.9354e+21	1.9992e+21	2.1018e+21	2.2044e+21	2.2505e+21	2.377e+21
1.20045	1.4576e+21	1.468e+21	1.5262e+21	1.5855e+21	1.6334e+21	1.6976e+21	1.7774e+21	1.8032e+21	1.8928e+21	2.0124e+21	2.1093e+21	2.1976e+21	2.2462e+21	2.3722e+21
1.2031	1.4459e+21	1.4684e+21	1.5235e+21	1.5737e+21	1.6197e+21	1.6735e+21	1.7628e+21	1.8102e+21	1.8645e+21	2.0042e+21	2.0896e+21	2.1879e+21	2.2597e+21	2.3521e+21
1.20575	1.417e+21	1.4663e+21	1.502e+21	1.5611e+21	1.6259e+21	1.6635e+21	1.7474e+21	1.7894e+21	1.8488e+21	1.9676e+21	2.056e+21	2.1824e+21	2.2473e+21	2.3564e+21
1.2084	1.4003e+21	1.4602e+21	1.4943e+21	1.5486e+21	1.6046e+21	1.6628e+21	1.7439e+21	1.7777e+21	1.8236e+21	1.9424e+21	2.0243e+21	2.18e+21	2.2502e+21	2.331e+21
1.21105	1.3911e+21	1.4441e+21	1.4905e+21	1.5242e+21	1.5904e+21	1.643e+21	1.7226e+21	1.7625e+21	1.8206e+21	1.9355e+21	2.0165e+21	2.1549e+21	2.2481e+21	2.3274e+21
1.2137	1.3844e+21	1.4289e+21	1.4969e+21	1.5239e+21	1.5919e+21	1.6274e+21	1.7087e+21	1.7703e+21	1.8006e+21	1.9224e+21	2.0106e+21	2.14e+21	2.2391e+21	2.3154e+21
1.21635	1.3733e+21	1.413e+21	1.4939e+21	1.5208e+21	1.5922e+21	1.615e+21	1.7002e+21	1.7622e+21	1.7997e+21	1.9406e+21	2.0108e+21	2.1304e+21	2.2316e+21	2.2846e+21
1.219	1.3601e+21	1.4062e+21	1.4852e+21	1.5203e+21	1.5919e+21	1.6345e+21	1.7012e+21	1.7545e+21	1.7967e+21	1.9582e+21	2.0002e+21	2.129e+21	2.2152e+21	2.2674e+21
1.22165	1.3537e+21	1.3959e+21	1.472e+21	1.5049e+21	1.5793e+21	1.6455e+21	1.6768e+21	1.7546e+21	1.7945e+21	1.9303e+21	1.9989e+21	2.1088e+21	2.174e+21	2.2492e+21
1.2243	1.3433e+21	1.3836e+21	1.4502e+21	1.4895e+21	1.5672e+21	1.6338e+21	1.666e+21	1.7373e+21	1.7882e+21	1.9104e+21	1.9821e+21	2.0923e+21	2.1686e+21	2.2384e+21
1.22695	1.3294e+21	1.3721e+21	1.4331e+21	1.4762e+21	1.5369e+21	1.6201e+21	1.6419e+21	1.7178e+21	1.7784e+21	1.9051e+21	1.9703e+21	2.0786e+21	2.1513e+21	2.2469e+21
1.2296	1.3093e+21	1.3632e+21	1.4225e+21	1.4723e+21	1.5231e+21	1.6059e+21	1.6369e+21	1.7036e+21	1.7583e+21	1.9151e+21	1.9649e+21	2.0844e+21	2.1671e+21	2.233e+21
1.23225	1.3004e+21	1.3552e+21	1.4017e+21	1.4545e+21	1.5116e+21	1.5833e+21	1.6281e+21	1.6859e+21	1.7705e+21	1.9229e+21	1.9641e+21	2.0847e+21	2.1625e+21	2.2239e+21
1.2349	1.2948e+21	1.3348e+21	1.3752e+21	1.4547e+21	1.511e+21	1.5728e+21	1.625e+21	1.6785e+21	1.7871e+21	1.8921e+21	1.9722e+21	2.0864e+21	2.1615e+21	2.2252e+21
1.23755	1.2836e+21	1.336e+21	1.3865e+21	1.4559e+21	1.5069e+21	1.5671e+21	1.6209e+21	1.6798e+21	1.7736e+21	1.8804e+21	1.9551e+21	2.1004e+21	2.1706e+21	2.2245e+21
1.2402	1.2768e+21	1.3415e+21	1.3962e+21	1.4505e+21	1.4991e+21	1.5745e+21	1.6027e+21	1.6678e+21	1.756e+21	1.8757e+21	1.9426e+21	2.0921e+21	2.1702e+21	2.2214e+21
1.24285	1.2645e+21	1.3242e+21	1.3929e+21	1.4261e+21	1.4871e+21	1.5678e+21	1.6013e+21	1.6669e+21	1.7475e+21	1.8615e+21	1.9448e+21	2.0933e+21	2.1636e+21	2.2273e+21
1.2455	1.2352e+21	1.298e+21	1.376e+21	1.4089e+21	1.4941e+21	1.5413e+21	1.6056e+21	1.6624e+21	1.7266e+21	1.8658e+21	1.9277e+21	2.0851e+21	2.1501e+21	2.2159e+21
1.24815	1.2066e+21	1.2899e+21	1.3554e+21	1.406e+21	1.4789e+21	1.5417e+21	1.6034e+21	1.6562e+21	1.7386e+21	1.8679e+21	1.9242e+21	2.0701e+21	2.1334e+21	2.213e+21
1.2508	1.2025e+21	1.2817e+21	1.3457e+21	1.394e+21	1.474e+21	1.5376e+21	1.5793e+21	1.6607e+21	1.735e+21	1.8441e+21	1.9199e+21	2.0625e+21	2.102e+21	2.2156e+21
1.25345	1.2174e+21	1.2759e+21	1.343e+21	1.4003e+21	1.455e+21	1.5268e+21	1.557e+21	1.6676e+21	1.7349e+21	1.8318e+21	1.9201e+21	2.0546e+21	2.0855e+21	2.2026e+21
1.2561	1.2293e+21	1.262e+21	1.3342e+21	1.3965e+21	1.4309e+21	1.5164e+21	1.5526e+21	1.665e+21	1.7247e+21	1.8196e+21	1.9199e+21	2.034e+21	2.077e+21	2.1916e+21
1.25875	1.2249e+21	1.2538e+21	1.3331e+21	1.3778e+21	1.4151e+21	1.5051e+21	1.5504e+21	1.6434e+21	1.7144e+21	1.816e+21	1.9251e+21	2.0226e+21	2.0669e+21	2.2015e+21
1.2614	1.2098e+21	1.2567e+21	1.3352e+21	1.3591e+21	1.4194e+21	1.4893e+21	1.5615e+21	1.6388e+21	1.704e+21	1.8165e+21	1.9119e+21	2.0019e+21	2.0405e+21	2.2167e+21
1.26405	1.206e+21	1.2624e+21	1.3147e+21	1.3549e+21	1.4219e+21	1.4841e+21	1.5825e+21	1.6389e+21	1.6768e+21	1.8004e+21	1.9077e+21	1.9858e+21	2.0319e+21	2.2206e+21
1.2667	1.1984e+21	1.2753e+21	1.2861e+21	1.3535e+21	1.4061e+21	1.4938e+21	1.5713e+21	1.636e+21	1.6704e+21	1.7937e+21	1.8939e+21	1.974e+21	2.0459e+21	2.2065e+21
1.26935	1.1992e+21	1.2923e+21	1.293e+21	1.342e+21	1.4168e+21	1.4936e+21	1.5538e+21	1.619e+21	1.6505e+21	1.822e+21	1.8996e+21	1.9889e+21	2.0328e+21	2.2082e+21
1.272	1.199e+21	1.2883e+21	1.3102e+21	1.34e+21	1.424e+21	1.4905e+21	1.5568e+21	1.5991e+21	1.6523e+21	1.8095e+21	1.8778e+21	1.9987e+21	2.0248e+21	2.1922e+21
1.27465	1.2112e+21	1.2755e+21	1.2981e+21	1.3438e+21	1.4251e+21	1.4489e+21	1.535e+21	1.5892e+21	1.6572e+21	1.7837e+21	1.859e+21	1.9965e+21	2.0284e+21	2.1547e+21
1.2773	1.2132e+21	1.2437e+21	1.279e+21	1.3315e+21	1.415e+21	1.4357e+21	1.5103e+21	1.5677e+21	1.6536e+21	1.7925e+21	1.8505e+21	1.9918e+21	2.0207e+21	2.1305e+21
1.27995	1.1926e+21	1.2129e+21	1.258e+21	1.305e+21	1.4155e+21	1.4404e+21	1.503e+21	1.5486e+21	1.6384e+21	1.7951e+21	1.8327e+21	1.9807e+21	1.9962e+21	2.1181e+21
1.2826	1.1751e+21	1.1961e+21	1.254e+21	1.3043e+21	1.3994e+21	1.4476e+21	1.5083e+21	1.5407e+21	1.6294e+21	1.7736e+21	1.8285e+21	1.9741e+21	1.9773e+21	2.11e+21
1.28525	1.1736e+21	1.1741e+21	1.245e+21	1.2993e+21	1.3676e+21	1.4504e+21	1.514e+21	1.5536e+21	1.634e+21	1.7622e+21	1.8271e+21	1.9698e+21	2.0003e+21	2.1169e+21
1.2879	1.1713e+21	1.169e+21	1.2337e+21	1.2891e+21	1.3505e+21	1.4637e+21	1.5171e+21	1.552e+21	1.6381e+21	1.7604e+21	1.8356e+21	1.9492e+21	2.0076e+21	2.0991e+21
1.29055	1.1639e+21	1.1575e+21	1.2254e+21	1.2598e+21	1.3369e+21	1.4557e+21	1.5244e+21	1.5302e+21	1.6336e+21	1.7652e+21	1.8338e+21	1.9452e+21	1.9997e+21	2.1071e+21
1.2932	1.1536e+21	1.1424e+21	1.2166e+21	1.2575e+21	1.3156e+21	1.425e+21	1.4963e+21	1.5406e+21	1.622e+21	1.7676e+21	1.8329e+21	1.9506e+21	1.9844e+21	2.0855e+21
1.29585	1.1502e+21	1.1647e+21	1.2112e+21	1.2528e+21	1.3027e+21	1.4044e+21	1.4862e+21	1.5504e+21	1.6189e+21	1.7643e+21	1.8191e+21	1.9614e+21	1.9754e+21	2.0819e+21
1.2985	1.159e+21	1.1498e+21	1.2113e+21	1.2606e+21	1.308e+21	1.4139e+21	1.4749e+21	1.5331e+21	1.614e+21	1.7445e+21	1.798e+21	1.9544e+21	1.9707e+21	2.077e+21
1.30115	1.154e+21	1.1344e+21	1.2165e+21	1.2466e+21	1.3099e+21	1.4173e+21	1.4534e+21	1.5219e+21	1.5985e+21	1.731e+21	1.7915e+21	1.9379e+21	1.9783e+21	2.0728e+21
1.3038	1.128e+21	1.1366e+21	1.2053e+21	1.2318e+21	1.3051e+21	1.4104e+21	1.4478e+21	1.5123e+21	1.597e+21	1.7211e+21	1.7908e+21	1.9387e+21	1.9807e+21	2.074e+21
1.30645	1.1224e+21	1.1342e+21	1.2001e+21	1.2206e+21	1.3064e+21	1.3928e+21	1.4391e+21	1.4887e+21	1.59e+21	1.7422e+21	1.766e+21	1.9364e+21	1.9934e+21	2.0667e+21
1.3091	1.122e+21	1.1389e+21	1.2074e+21	1.2199e+21	1.3002e+21	1.3912e+21	1.4449e+21	1.4886e+21	1.55e+21	1.7309e+21	1.746e+21	1.9314e+21	1.9909e+21	2.0724e+21
1.31175	1.1125e+21	1.1433e+21	1.1927e+21	1.2104e+21	1.3019e+21	1.3716e+21	1.458e+21	1.4836e+21	1.5455e+21	1.698e+21	1.7522e+21	1.9165e+21	1.9467e+21	2.0666e+21
1.3144	1.1238e+21	1.1316e+21	1.2024e+21	1.2124e+21	1.2927e+21	1.345e+21	1.4503e+21	1.4697e+21	1.56e+21	1.6845e+21	1.7464e+21	1.9112e+21	1.9307e+21	2.0548e+21
1.31705	1.131e+21	1.1258e+21	1.1972e+21	1.2193e+21	1.2698e+21	1.3519e+21	1.4258e+21	1.4571e+21	1.5598e+21	1.678e+21	1.7422e+21	1.8833e+21	1.9344e+21	2.0374e+21
1.3197	1.1342e+21	1.127e+21	1.1839e+21	1.2158e+21	1.2722e+21	1.3563e+21	1.41e+21	1.4603e+21	1.5488e+21	1.6718e+21	1.7241e+21	1.8697e+21	1.9114e+21	2.039e+21
1.32235	1.1152e+21	1.1206e+21	1.1759e+21	1.2046e+21	1.2755e+21	1.3575e+21	1.4085e+21	1.4642e+21	1.5415e+21	1.6661e+21	1.698e+21	1.8626e+21	1.8966e+21	2.0379e+21
1.325	1.0949e+21	1.1171e+21	1.1676e+21	1.2095e+21	1.2681e+21	1.3399e+21	1.4046e+21	1.4547e+21	1.5228e+21	1.6549e+21	1.6885e+21	1.8382e+21	1.8754e+21	2.0177e+21
1.32765	1.0854e+21	1.1036e+21	1.1816e+21	1.2041e+21	1.2655e+21	1.3399e+21	1.4096e+21	1.4432e+21	1.4878e+21	1.6364e+21	1.6875e+21	1.8077e+21	1.8727e+21	2.0023e+21
1.3303	1.0921e+21	1.0995e+21	1.1823e+21	1.1923e+21	1.2685e+21	1.3448e+21	1.4119e+21	1.4592e+21	1.4699e+21	1.6253e+21	1.6821e+21	1.8012e+21	1.8679e+21	2.0073e+21
1.33295	1.0874e+21	1.097e+21	1.1752e+21	1.1858e+21	1.2718e+21	1.3412e+21	1.4075e+21	1.4517e+21	1.498e+21	1.6155e+21	1.6965e+21	1.8011e+21	1.8774e+21	2.0004e+21
1.3356	1.0892e+21	1.0956e+21	1.1675e+21	1.2041e+21	1.2582e+21	1.3299e+21	1.4099e+21	1.4507e+21	1.5052e+21	1.6121e+21	1.6805e+21	1.8025e+21	1.8988e+21	2.0016e+21
1.33825	1.1e+21	1.0857e+21	1.1597e+21	1.1995e+21	1.2531e+21	1.3211e+21	1.4031e+21	1.4357e+21	1.5042e+21	1.6179e+21	1.6829e+21	1.8024e+21	1.9064e+21	1.9869e+21
1.3409	1.1139e+21	1.0835e+21	1.1447e+21	1.1954e+21	1.2497e+21	1.3049e+21	1.3964e+21	1.4244e+21	1.5137e+21	1.6045e+21	1.6805e+21	1.7911e+21	1.8921e+21	1.9686e+21
1.34355	1.0942e+21	1.0725e+21	1.1339e+21	1.1868e+21	1.2433e+21	1.3145e+21	1.3778e+21	1.4207e+21	1.4994e+21	1.6008e+21	1.6706e+21	1.7874e+21	1.8667e+21	1.9595e+21
1.3462	1.0686e+21	1.0603e+21	1.1109e+21	1.1664e+21	1.23e+21	1.3011e+21	1.3814e+21	1.4002e+21	1.4878e+21	1.606e+21	1.6564e+21	1.789e+21	1.8615e+21	1.9516e+21
1.34885	1.0603e+21	1.0606e+21	1.1138e+21	1.1385e+21	1.2138e+21	1.2856e+21	1.3744e+21	1.3683e+21	1.4712e+21	1.6088e+21	1.6474e+21	1.776e+21	1.8566e+21	1.9519e+21
1.3515	1.0417e+21	1.065e+21	1.1137e+21	1.1314e+21	1.2158e+21	1.2565e+21	1.3427e+21	1.3539e+21	1.446e+21	1.6007e+21	1.63e+21	1.7654e+21	1.8501e+21	1.9608e+21
1.35415	1.0203e+21	1.0565e+21	1.1067e+21	1.1312e+21	1.2035e+21	1.2443e+21	1.329e+21	1.3376e+21	1.4352e+21	1.5791e+21	1.629e+21	1.7563e+21	1.8464e+21	1.9431e+21
1.3568	1.0052e+21	1.0454e+21	1.0859e+21	1.1284e+21	1.1995e+21	1.249e+21	1.2979e+21	1.3453e+21	1.4321e+21	1.5503e+21	1.6035e+21	1.7531e+21	1.8499e+21	1.9112e+21
1.35945	1.0003e+21	1.0213e+21	1.0745e+21	1.1108e+21	1.18e+21	1.2494e+21	1.2802e+21	1.3398e+21	1.4169e+21	1.5333e+21	1.5832e+21	1.7401e+21	1.8369e+21	1.8842e+21
1.3621	1.0021e+21	1.0038e+21	1.0713e+21	1.0811e+21	1.1688e+21	1.22e+21	1.2623e+21	1.3102e+21	1.404e+21	1.5112e+21	1.5597e+21	1.7156e+21	1.8155e+21	1.8604e+21
1.36475	9.8987e+20	9.8708e+20	1.0584e+21	1.0637e+21	1.1642e+21	1.1967e+21	1.2455e+21	1.2767e+21	1.4116e+21	1.4922e+21	1.5621e+21	1.6788e+21	1.7941e+21	1.85e+21
1.3674	9.7737e+20	9.8533e+20	1.01e+21	1.0396e+21	1.1468e+21	1.1763e+21	1.231e+21	1.2592e+21	1.369e+21	1.4673e+21	1.5495e+21	1.6549e+21	1.7494e+21	1.8416e+21
1.37005	9.5661e+20	9.7078e+20	9.9045e+20	1.0208e+21	1.1251e+21	1.155e+21	1.2325e+21	1.2343e+21	1.3302e+21	1.4403e+21	1.4967e+21	1.6235e+21	1.7167e+21	1.792e+21
1.3727	9.206e+20	9.5156e+20	9.7801e+20	1.0117e+21	1.1088e+21	1.1408e+21	1.2026e+21	1.2216e+21	1.2994e+21	1.4201e+21	1.4762e+21	1.5862e+21	1.6898e+21	1.7508e+21
1.37535	9.0167e+20	9.1365e+20	9.7842e+20	1.0113e+21	1.0912e+21	1.1107e+21	1.164e+21	1.2168e+21	1.2915e+21	1.3924e+21	1.4523e+21	1.5494e+21	1.662e+21	1.7082e+21
1.378	8.8513e+20	8.7982e+20	9.6177e+20	9.9528e+20	1.0627e+21	1.0833e+21	1.1187e+21	1.1887e+21	1.2804e+21	1.362e+21	1.4037e+21	1.5174e+21	1.6085e+21	1.6635e+21
1.38065	8.4704e+20	8.5129e+20	9.0834e+20	9.6416e+20	1.0285e+21	1.0669e+21	1.0781e+21	1.1418e+21	1.2514e+21	1.3299e+21	1.337e+21	1.4751e+21	1.5713e+21	1.6283e+21
1.3833	8.1502e+20	8.3088e+20	8.6878e+20	9.2273e+20	1.0066e+21	1.0342e+21	1.0417e+21	1.1123e+21	1.2131e+21	1.2777e+21	1.3165e+21	1.442e+21	1.5413e+21	1.584e+21
1.38595	7.8481e+20	7.9252e+20	8.2389e+20	8.7589e+20	9.6183e+20	9.8993e+20	1.0127e+21	1.0623e+21	1.1634e+21	1.2154e+21	1.275e+21	1.3803e+21	1.4898e+21	1.5363e+21
1.3886	7.3607e+20	7.4246e+20	7.9292e+20	8.3374e+20	9.0823e+20	9.4544e+20	9.7392e+20	1.0034e+21	1.0707e+21	1.1607e+21	1.23e+21	1.3254e+21	1.4309e+21	1.483e+21
1.39125	6.8504e+20	6.971e+20	7.5453e+20	7.939e+20	8.4619e+20	8.9925e+20	9.2824e+20	9.3781e+20	9.945e+20	1.1231e+21	1.164e+21	1.2545e+21	1.358e+21	1.399e+21
1.3939	6.0711e+20	6.5939e+20	6.954e+20	7.342e+20	7.9572e+20	8.1016e+20	8.5755e+20	8.6216e+20	9.2565e+20	1.0471e+21	1.0936e+21	1.1555e+21	1.3005e+21	1.3339e+21
1.39655	5.3074e+20	6.0734e+20	6.3691e+20	6.6731e+20	7.2129e+20	7.516e+20	7.6591e+20	8.0035e+20	8.788e+20	9.6934e+20	1.0347e+21	1.0842e+21	1.2195e+21	1.2552e+21
1.3992	4.8573e+20	5.6036e+20	5.9301e+20	6.1915e+20	6.616e+20	7.0462e+20	7.1677e+20	7.4849e+20	8.2377e+20	9.0038e+20	9.7241e+20	1.0257e+21	1.1578e+21	1.1654e+21
1.40185	4.4455e+20	5.2798e+20	5.5747e+20	5.8763e+20	6.1506e+20	6.6841e+20	6.7834e+20	7.1218e+20	7.91e+20	8.623e+20	9.2083e+20	9.9583e+20	1.1051e+21	1.1264e+21
1.4045	4.3979e+20	5.1067e+20	5.4116e+20	5.7188e+20	5.9289e+20	6.566e+20	6.7775e+20	7.017e+20	7.6391e+20	8.4288e+20	8.8963e+20	9.6258e+20	1.0627e+21	1.1045e+21
1.40715	4.5898e+20	5.2138e+20	5.4078e+20	5.7711e+20	5.8409e+20	6.5182e+20	7.0037e+20	7.1431e+20	7.6664e+20	8.487e+20	8.7175e+20	9.3293e+20	1.0341e+21	1.0802e+21
1.4098	5.203e+20	5.6182e+20	5.5484e+20	5.899e+20	6.054e+20	6.7942e+20	7.1025e+20	7.4466e+20	7.8663e+20	8.6686e+20	8.8156e+20	9.3483e+20	1.0065e+21	1.065e+21
1.41245	5.4905e+20	6.0508e+20	5.9956e+20	6.2451e+20	6.3468e+20	6.912e+20	7.2649e+20	7.5399e+20	8.0555e+20	8.7912e+20	8.9896e+20	9.3353e+20	9.9712e+20	1.0437e+21
1.4151	5.7702e+20	6.1856e+20	6.2541e+20	6.5991e+20	6.6677e+20	6.9183e+20	7.2442e+20	7.583e+20	7.9112e+20	8.4852e+20	8.8244e+20	8.9779e+20	9.6893e+20	9.9056e+20
1.41775	5.7036e+20	6.1068e+20	6.0783e+20	6.6771e+20	6.5868e+20	6.6666e+20	6.9922e+20	7.2291e+20	7.4985e+20	7.8961e+20	8.0139e+20	8.4106e+20	9.0698e+20	9.3459e+20
1.4204	5.2965e+20	5.551e+20	5.5817e+20	6.2163e+20	6.1369e+20	6.1573e+20	6.3005e+20	6.5594e+20	6.6336e+20	7.1736e+20	7.0899e+20	7.3843e+20	8.3303e+20	8.269e+20
1.42305	4.5556e+20	4.6274e+20	4.8567e+20	5.418e+20	5.3597e+20	5.3216e+20	5.424e+20	5.3271e+20	5.5992e+20	6.0789e+20	6.0524e+20	6.2268e+20	7.3676e+20	7.2166e+20
1.4257	3.6669e+20	3.661e+20	4.1211e+20	4.4097e+20	4.4935e+20	4.469e+20	4.4238e+20	4.3844e+20	4.3698e+20	5.087e+20	4.9928e+20	5.187e+20	6.2257e+20	6.0404e+20
1.42835	2.6808e+20	2.952e+20	3.2629e+20	3.4533e+20	3.6154e+20	3.562e+20	3.512e+20	3.6228e+20	3.4861e+20	3.8881e+20	4.1151e+20	4.2568e+20	5.2042e+20	5.1062e+20
1.431	1.9074e+20	2.2314e+20	2.4374e+20	2.6076e+20	2.9303e+20	2.8679e+20	2.7663e+20	2.8638e+20	2.775e+20	3.0802e+20	3.2487e+20	3.5555e+20	4.3402e+20	4.2353e+20
1.43365	1.3151e+20	1.5855e+20	1.8113e+20	1.9383e+20	2.0173e+20	2.1792e+20	2.0485e+20	2.2242e+20	2.1492e+20	2.58e+20	2.4865e+20	2.6443e+20	3.4033e+20	3.3192e+20
1.4363	6.7345e+19	1.0802e+20	1.1401e+20	1.3995e+20	1.4391e+20	1.3943e+20	1.4761e+20	1.6999e+20	1.6886e+20	1.6706e+20	1.8264e+20	2.1072e+20	2.5872e+20	2.6585e+20
1.43895	1.9682e+19	5.8532e+19	7.7235e+19	7.555e+19	9.9875e+19	6.9823e+19	9.5158e+19	1.169e+20	9.5122e+19	1.1385e+20	1.3163e+20	1.7061e+20	1.9704e+20	2.0361e+20
1.4416	-6.3156e+18	9.5961e+18	2.0678e+19	1.9376e+19	5.2837e+19	2.2592e+19	3.8357e+19	5.2031e+19	5.1113e+19	7.283e+19	6.3538e+19	1.1628e+20	1.3809e+20	1.3943e+20
1.44425	-4.5399e+19	-4.3005e+19	-3.8157e+19	-2.5238e+19	3.5336e+18	-1.271e+19	-3.0276e+18	-6.3024e+18	1.5203e+19	3.0069e+19	2.103e+19	7.4476e+19	8.4512e+19	8.5633e+19
1.4469	-7.503e+19	-7.0541e+19	-7.9346e+19	-7.2101e+19	-2.1451e+19	-4.3813e+19	-4.5494e+19	-4.4885e+19	-3.4238e+19	-1.2904e+19	-3.0437e+18	1.6761e+19	3.9907e+19	4.3654e+19
1.44955	-1.1464e+20	-1.1566e+20	-1.1472e+20	-1.0317e+20	-6.2189e+19	-6.748e+19	-7.5631e+19	-7.0453e+19	-6.3532e+19	-4.7196e+19	-3.2816e+19	-4.4679e+19	-2.4905e+18	1.0991e+18
1.4522	-1.6034e+20	-1.5088e+20	-1.4737e+20	-1.2159e+20	-1.1936e+20	-9.689e+19	-1.0069e+20	-9.5094e+19	-1.0142e+20	-7.6187e+19	-6.2855e+19	-9.062e+19	-3.9913e+19	-2.7604e+19
1.45485	-1.9418e+20	-1.8616e+20	-1.6077e+20	-1.4309e+20	-1.4269e+20	-1.4706e+20	-1.3635e+20	-1.1989e+20	-1.2763e+20	-1.146e+20	-1.0126e+20	-1.2189e+20	-8.0453e+19	-6.4693e+19
1.4575	-2.1595e+20	-2.0506e+20	-1.8812e+20	-1.7274e+20	-1.752e+20	-1.8653e+20	-1.5137e+20	-1.5774e+20	-1.5982e+20	-1.4253e+20	-1.3058e+20	-1.5647e+20	-1.1195e+20	-9.9235e+19
1.46015	-2.3668e+20	-2.301e+20	-2.1824e+20	-1.9057e+20	-2.001e+20	-2.1713e+20	-1.7561e+20	-1.8673e+20	-2.0193e+20	-1.7376e+20	-1.58e+20	-1.7076e+20	-1.4948e+20	-1.2304e+20
1.4628	-2.5275e+20	-2.4696e+20	-2.3413e+20	-2.2285e+20	-2.2342e+20	-2.3516e+20	-2.0868e+20	-2.0358e+20	-2.4672e+20	-1.9831e+20	-1.8885e+20	-1.8362e+20	-1.8414e+20	-1.4971e+20
1.46545	-2.6861e+20	-2.7016e+20	-2.5759e+20	-2.3688e+20	-2.4915e+20	-2.4936e+20	-2.4217e+20	-2.1986e+20	-2.7347e+20	-2.266e+20	-2.2163e+20	-2.1455e+20	-2.0269e+20	-1.8161e+20
1.4681	-2.9196e+20	-2.9072e+20	-2.8096e+20	-2.5882e+20	-2.5786e+20	-2.6297e+20	-2.6401e+20	-2.3881e+20	-2.8531e+20	-2.4647e+20	-2.3866e+20	-2.3983e+20	-2.2012e+20	-2.2074e+20
1.47075	-3.2211e+20	-3.0484e+20	-3.0322e+20	-2.7451e+20	-2.6744e+20	-2.7381e+20	-2.8081e+20	-2.6812e+20	-2.9449e+20	-2.7236e+20	-2.4167e+20	-2.5387e+20	-2.5763e+20	-2.5287e+20
1.4734	-3.3408e+20	-3.2162e+20	-3.141e+20	-2.9089e+20	-2.9159e+20	-2.8508e+20	-3.0134e+20	-2.8936e+20	-3.2247e+20	-2.9879e+20	-2.7518e+20	-2.8435e+20	-2.9631e+20	-2.8485e+20
1.47605	-3.395e+20	-3.3847e+20	-3.2798e+20	-3.0765e+20	-3.1738e+20	-3.1266e+20	-3.2704e+20	-3.0631e+20	-3.4701e+20	-3.2234e+20	-3.0881e+20	-3.1264e+20	-3.1436e+20	-3.0383e+20
1.4787	-3.4371e+20	-3.4696e+20	-3.4421e+20	-3.3542e+20	-3.4457e+20	-3.3645e+20	-3.4431e+20	-3.3754e+20	-3.5611e+20	-3.3954e+20	-3.2612e+20	-3.2864e+20	-3.2517e+20	-3.3038e+20
1.48135	-3.6755e+20	-3.5428e+20	-3.6404e+20	-3.7208e+20	-3.5162e+20	-3.5772e+20	-3.5329e+20	-3.6052e+20	-3.6074e+20	-3.4556e+20	-3.2954e+20	-3.5222e+20	-3.4491e+20	-3.5207e+20
1.484	-3.9523e+20	-3.6732e+20	-3.8419e+20	-3.9461e+20	-3.7646e+20	-3.7715e+20	-3.658e+20	-3.7408e+20	-3.8287e+20	-3.5872e+20	-3.559e+20	-3.5873e+20	-3.6586e+20	-3.6685e+20
1.48665	-4.1893e+20	-3.8859e+20	-3.8891e+20	-4.0766e+20	-3.9453e+20	-3.9512e+20	-3.9267e+20	-3.9976e+20	-3.9384e+20	-3.7995e+20	-3.8278e+20	-3.6551e+20	-3.7321e+20	-3.8167e+20
1.4893	-4.1865e+20	-4.0806e+20	-3.928e+20	-4.014e+20	-4.0458e+20	-4.0956e+20	-4.1328e+20	-4.099e+20	-3.866e+20	-3.9574e+20	-3.9249e+20	-3.834e+20	-3.8423e+20	-3.8997e+20
1.49195	-4.2176e+20	-4.2312e+20	-4.0959e+20	-4.0287e+20	-4.1037e+20	-4.3285e+20	-4.2206e+20	-4.3171e+20	-3.9715e+20	-4.0432e+20	-4.0263e+20	-4.018e+20	-4.0072e+20	-3.9144e+20
1.4946	-4.2503e+20	-4.244e+20	-4.244e+20	-4.2105e+20	-4.0159e+20	-4.259e+20	-4.2772e+20	-4.4059e+20	-4.1298e+20	-4.2696e+20	-4.1451e+20	-4.2116e+20	-4.1514e+20	-4.2374e+20
1.49725	-4.3487e+20	-4.1941e+20	-4.3444e+20	-4.3206e+20	-4.1545e+20	-4.2328e+20	-4.3133e+20	-4.3901e+20	-4.4226e+20	-4.2953e+20	-4.3251e+20	-4.3103e+20	-4.3468e+20	-4.6129e+20
1.4999	-4.4778e+20	-4.4226e+20	-4.4396e+20	-4.584e+20	-4.2937e+20	-4.3059e+20	-4.4868e+20	-4.377e+20	-4.5522e+20	-4.4473e+20	-4.5471e+20	-4.5006e+20	-4.42e+20	-4.6487e+20
1.50255	-4.563e+20	-4.5189e+20	-4.5198e+20	-4.5894e+20	-4.4523e+20	-4.401e+20	-4.6348e+20	-4.6178e+20	-4.6227e+20	-4.5615e+20	-4.6661e+20	-4.7209e+20	-4.5571e+20	-4.827e+20
1.5052	-4.6936e+20	-4.5658e+20	-4.5505e+20	-4.6902e+20	-4.7516e+20	-4.6706e+20	-4.7666e+20	-4.7447e+20	-4.6714e+20	-4.789e+20	-4.8284e+20	-4.8935e+20	-4.6828e+20	-4.9849e+20
1.50785	-4.6793e+20	-4.665e+20	-4.7265e+20	-4.8126e+20	-4.8925e+20	-4.7742e+20	-4.7797e+20	-4.8206e+20	-4.7449e+20	-4.8649e+20	-4.8659e+20	-4.756e+20	-4.7614e+20	-5.0079e+20
1.5105	-4.9408e+20	-4.8225e+20	-4.7616e+20	-4.86e+20	-4.935e+20	-4.8699e+20	-4.8019e+20	-5.0353e+20	-4.887e+20	-4.9679e+20	-4.8903e+20	-4.5607e+20	-4.9031e+20	-5.1764e+20
1.51315	-5.0075e+20	-4.8875e+20	-4.7622e+20	-4.8851e+20	-4.8979e+20	-4.8508e+20	-4.8683e+20	-5.1151e+20	-5.0263e+20	-4.9528e+20	-4.9705e+20	-4.5637e+20	-5.0037e+20	-5.2512e+20
1.5158	-4.8414e+20	-4.85e+20	-4.8568e+20	-4.996e+20	-4.9693e+20	-4.8356e+20	-4.803e+20	-5.1322e+20	-5.0971e+20	-5.0745e+20	-5.0465e+20	-4.6895e+20	-4.9736e+20	-5.2721e+20
1.51845	-4.9566e+20	-4.9005e+20	-4.9212e+20	-5.2075e+20	-5.0743e+20	-4.8364e+20	-4.7833e+20	-5.2854e+20	-5.011e+20	-5.1436e+20	-5.1621e+20	-4.9914e+20	-5.0903e+20	-5.257e+20
1.5211	-5.0715e+20	-5.0451e+20	-4.9224e+20	-5.3635e+20	-5.2018e+20	-4.8663e+20	-4.8805e+20	-5.3051e+20	-5.0554e+20	-5.234e+20	-5.2093e+20	-5.203e+20	-5.1636e+20	-5.3029e+20
1.52375	-5.1012e+20	-5.1838e+20	-4.9436e+20	-5.2256e+20	-5.2005e+20	-5.135e+20	-4.9756e+20	-5.3183e+20	-5.1871e+20	-5.2645e+20	-5.2879e+20	-5.3252e+20	-5.2682e+20	-5.4576e+20
1.5264	-5.1141e+20	-5.2475e+20	-5.0711e+20	-5.3857e+20	-5.1712e+20	-5.244e+20	-5.1533e+20	-5.3259e+20	-5.2675e+20	-5.1701e+20	-5.3177e+20	-5.3387e+20	-5.4138e+20	-5.4861e+20
1.52905	-5.1483e+20	-5.2006e+20	-5.0303e+20	-5.4416e+20	-5.2762e+20	-5.0651e+20	-5.1884e+20	-5.2715e+20	-5.2161e+20	-5.099e+20	-5.3078e+20	-5.3587e+20	-5.5486e+20	-5.4896e+20

## Sheet: Figure 4b
Figure 4b	Evolution of 6Li content during cycling at the center of the cell (separator charge)
	6Li atomic density (at/cm3) at different SoC (%)
Distance (mm)	0	10	20	30	40	50	60	70	80	90	92.5	95	97.5	100
0	1.2341e+21	1.2478e+21	1.2894e+21	1.2632e+21	1.2576e+21	1.2541e+21	1.2229e+21	1.2572e+21	1.2176e+21	1.2157e+21	1.2164e+21	1.1925e+21	1.2459e+21	1.2191e+21
0.00265	1.2613e+21	1.2779e+21	1.3025e+21	1.3061e+21	1.3033e+21	1.2924e+21	1.2501e+21	1.2758e+21	1.2372e+21	1.2258e+21	1.2269e+21	1.2118e+21	1.2826e+21	1.2362e+21
0.0053	1.2815e+21	1.3178e+21	1.3227e+21	1.3348e+21	1.326e+21	1.3198e+21	1.2642e+21	1.302e+21	1.2664e+21	1.2784e+21	1.282e+21	1.2458e+21	1.3236e+21	1.2694e+21
0.00795	1.3045e+21	1.3431e+21	1.3643e+21	1.3721e+21	1.3587e+21	1.343e+21	1.2926e+21	1.3188e+21	1.3181e+21	1.3226e+21	1.3295e+21	1.2792e+21	1.3581e+21	1.3012e+21
0.0106	1.3236e+21	1.3694e+21	1.3758e+21	1.4075e+21	1.4057e+21	1.3887e+21	1.345e+21	1.3469e+21	1.3622e+21	1.3584e+21	1.3786e+21	1.3097e+21	1.4057e+21	1.3389e+21
0.01325	1.3661e+21	1.4152e+21	1.4114e+21	1.4223e+21	1.4505e+21	1.4421e+21	1.4111e+21	1.4067e+21	1.3927e+21	1.3863e+21	1.4148e+21	1.3651e+21	1.4413e+21	1.3837e+21
0.0159	1.4189e+21	1.4507e+21	1.4518e+21	1.458e+21	1.4668e+21	1.4762e+21	1.4511e+21	1.4533e+21	1.4286e+21	1.4257e+21	1.4567e+21	1.42e+21	1.4723e+21	1.4332e+21
0.01855	1.4596e+21	1.4998e+21	1.515e+21	1.5032e+21	1.4871e+21	1.5268e+21	1.4808e+21	1.5067e+21	1.4814e+21	1.4785e+21	1.4776e+21	1.4803e+21	1.5098e+21	1.4836e+21
0.0212	1.5079e+21	1.5511e+21	1.5512e+21	1.5591e+21	1.5462e+21	1.5822e+21	1.5315e+21	1.5723e+21	1.542e+21	1.5228e+21	1.5221e+21	1.5257e+21	1.5346e+21	1.52e+21
0.02385	1.5525e+21	1.5861e+21	1.6043e+21	1.6103e+21	1.5762e+21	1.6149e+21	1.5736e+21	1.6e+21	1.583e+21	1.5804e+21	1.564e+21	1.5736e+21	1.5735e+21	1.5665e+21
0.0265	1.5837e+21	1.6219e+21	1.6775e+21	1.6492e+21	1.6354e+21	1.6309e+21	1.6137e+21	1.6169e+21	1.6078e+21	1.6491e+21	1.5931e+21	1.6247e+21	1.6297e+21	1.636e+21
0.02915	1.6202e+21	1.6778e+21	1.7392e+21	1.6818e+21	1.6839e+21	1.6902e+21	1.6663e+21	1.6718e+21	1.6411e+21	1.7113e+21	1.6527e+21	1.6805e+21	1.6974e+21	1.7185e+21
0.0318	1.6875e+21	1.7487e+21	1.7795e+21	1.7449e+21	1.7187e+21	1.7694e+21	1.728e+21	1.7433e+21	1.7003e+21	1.7746e+21	1.7282e+21	1.7381e+21	1.7544e+21	1.774e+21
0.03445	1.7446e+21	1.7875e+21	1.8251e+21	1.8075e+21	1.786e+21	1.8478e+21	1.8115e+21	1.7946e+21	1.7591e+21	1.817e+21	1.8076e+21	1.8003e+21	1.7981e+21	1.832e+21
0.0371	1.7889e+21	1.8315e+21	1.8593e+21	1.8575e+21	1.8464e+21	1.8945e+21	1.8703e+21	1.8406e+21	1.8236e+21	1.8705e+21	1.8755e+21	1.8654e+21	1.8515e+21	1.899e+21
0.03975	1.8353e+21	1.8989e+21	1.9249e+21	1.9189e+21	1.9107e+21	1.9588e+21	1.9316e+21	1.9075e+21	1.9091e+21	1.9196e+21	1.9217e+21	1.9235e+21	1.9029e+21	1.9665e+21
0.0424	1.8913e+21	1.9412e+21	1.978e+21	1.9771e+21	1.949e+21	2.0404e+21	1.9955e+21	1.9638e+21	1.9739e+21	1.9675e+21	1.9674e+21	1.9761e+21	1.9829e+21	2.012e+21
0.04505	1.9417e+21	1.9737e+21	2.0318e+21	2.0229e+21	2.0032e+21	2.0875e+21	2.045e+21	2.0021e+21	2.0668e+21	2.0164e+21	2.021e+21	2.0597e+21	2.071e+21	2.0844e+21
0.0477	1.9756e+21	2.0361e+21	2.0889e+21	2.069e+21	2.0497e+21	2.154e+21	2.1062e+21	2.0717e+21	2.1175e+21	2.0736e+21	2.0967e+21	2.1195e+21	2.1248e+21	2.1849e+21
0.05035	2.0158e+21	2.0741e+21	2.1476e+21	2.124e+21	2.1128e+21	2.2087e+21	2.1645e+21	2.148e+21	2.1353e+21	2.1643e+21	2.1747e+21	2.1982e+21	2.2151e+21	2.2462e+21
0.053	2.081e+21	2.1122e+21	2.1999e+21	2.2161e+21	2.1974e+21	2.2707e+21	2.2254e+21	2.226e+21	2.1929e+21	2.2455e+21	2.2584e+21	2.2733e+21	2.2858e+21	2.3096e+21
0.05565	2.1744e+21	2.1862e+21	2.267e+21	2.3124e+21	2.2886e+21	2.3466e+21	2.2982e+21	2.3022e+21	2.2853e+21	2.3177e+21	2.336e+21	2.3327e+21	2.3642e+21	2.3788e+21
0.0583	2.2381e+21	2.286e+21	2.3329e+21	2.394e+21	2.3788e+21	2.4243e+21	2.3829e+21	2.3943e+21	2.4017e+21	2.4025e+21	2.413e+21	2.4132e+21	2.4523e+21	2.4329e+21
0.06095	2.2896e+21	2.359e+21	2.405e+21	2.4491e+21	2.4583e+21	2.4919e+21	2.4653e+21	2.4757e+21	2.4602e+21	2.4597e+21	2.491e+21	2.5071e+21	2.5374e+21	2.5327e+21
0.0636	2.3546e+21	2.4183e+21	2.4788e+21	2.5134e+21	2.5264e+21	2.5534e+21	2.5135e+21	2.5495e+21	2.5577e+21	2.5097e+21	2.596e+21	2.6006e+21	2.6381e+21	2.64e+21
0.06625	2.4243e+21	2.4848e+21	2.6013e+21	2.6011e+21	2.6027e+21	2.6372e+21	2.625e+21	2.6286e+21	2.6479e+21	2.6079e+21	2.6746e+21	2.6856e+21	2.7313e+21	2.7433e+21
0.0689	2.501e+21	2.5821e+21	2.6791e+21	2.6643e+21	2.6971e+21	2.738e+21	2.7357e+21	2.7161e+21	2.753e+21	2.7548e+21	2.7835e+21	2.794e+21	2.8447e+21	2.8602e+21
0.07155	2.5845e+21	2.6826e+21	2.7787e+21	2.764e+21	2.8139e+21	2.8324e+21	2.8504e+21	2.8099e+21	2.8781e+21	2.8828e+21	2.9078e+21	2.8917e+21	2.962e+21	2.9656e+21
0.0742	2.6769e+21	2.8089e+21	2.8659e+21	2.8854e+21	2.9018e+21	2.94e+21	2.96e+21	2.9323e+21	3.0012e+21	3.0132e+21	3.0559e+21	3.0328e+21	3.1053e+21	3.1244e+21
0.07685	2.8041e+21	2.8835e+21	3.0097e+21	3.0165e+21	3.0411e+21	3.0763e+21	3.0634e+21	3.079e+21	3.1579e+21	3.1798e+21	3.2246e+21	3.2041e+21	3.2462e+21	3.2804e+21
0.0795	2.9236e+21	3.0036e+21	3.1646e+21	3.1664e+21	3.2058e+21	3.215e+21	3.2236e+21	3.2416e+21	3.2731e+21	3.3494e+21	3.3614e+21	3.3587e+21	3.4433e+21	3.4854e+21
0.08215	3.032e+21	3.1171e+21	3.276e+21	3.3162e+21	3.3656e+21	3.3772e+21	3.4346e+21	3.4019e+21	3.4299e+21	3.4933e+21	3.523e+21	3.5268e+21	3.6356e+21	3.6724e+21
0.0848	3.1694e+21	3.2858e+21	3.3934e+21	3.4758e+21	3.5765e+21	3.5385e+21	3.6159e+21	3.5822e+21	3.6486e+21	3.6846e+21	3.7206e+21	3.7243e+21	3.8417e+21	3.9208e+21
0.08745	3.3197e+21	3.4479e+21	3.5616e+21	3.6328e+21	3.7764e+21	3.7533e+21	3.8041e+21	3.8201e+21	3.8847e+21	3.9364e+21	3.987e+21	3.9903e+21	4.1274e+21	4.2006e+21
0.0901	3.4419e+21	3.6307e+21	3.7853e+21	3.8617e+21	3.972e+21	4.0126e+21	4.0848e+21	4.0812e+21	4.1479e+21	4.2022e+21	4.2816e+21	4.2872e+21	4.4181e+21	4.4773e+21
0.09275	3.6666e+21	3.8499e+21	4.0124e+21	4.0996e+21	4.2347e+21	4.2898e+21	4.3325e+21	4.3305e+21	4.4418e+21	4.4855e+21	4.5965e+21	4.5568e+21	4.6681e+21	4.7636e+21
0.0954	3.8923e+21	4.0715e+21	4.2923e+21	4.3879e+21	4.5401e+21	4.6029e+21	4.6073e+21	4.6582e+21	4.7186e+21	4.7806e+21	4.8619e+21	4.8578e+21	4.9065e+21	5.0169e+21
0.09805	4.1729e+21	4.3228e+21	4.5641e+21	4.7251e+21	4.8029e+21	4.8708e+21	4.8839e+21	4.9552e+21	5.004e+21	5.1115e+21	5.1443e+21	5.1849e+21	5.2374e+21	5.2622e+21
0.1007	4.4072e+21	4.6001e+21	4.8791e+21	4.969e+21	5.1073e+21	5.1358e+21	5.133e+21	5.2154e+21	5.3269e+21	5.3784e+21	5.401e+21	5.43e+21	5.5346e+21	5.5429e+21
0.10335	4.7074e+21	4.8746e+21	5.1226e+21	5.202e+21	5.3693e+21	5.4096e+21	5.408e+21	5.4522e+21	5.5466e+21	5.6028e+21	5.6548e+21	5.6833e+21	5.7744e+21	5.7952e+21
0.106	5.0064e+21	5.1322e+21	5.3428e+21	5.4994e+21	5.623e+21	5.7006e+21	5.6225e+21	5.7066e+21	5.7802e+21	5.8455e+21	5.8778e+21	5.8816e+21	6.0075e+21	6.0391e+21
0.10865	5.282e+21	5.3906e+21	5.581e+21	5.7261e+21	5.8352e+21	5.8847e+21	5.8561e+21	5.9374e+21	5.9959e+21	6.0215e+21	6.0838e+21	6.0786e+21	6.2299e+21	6.2103e+21
0.1113	5.5127e+21	5.6084e+21	5.8202e+21	5.9569e+21	6.048e+21	6.1055e+21	6.0355e+21	6.1552e+21	6.2076e+21	6.2221e+21	6.2697e+21	6.2924e+21	6.3903e+21	6.3534e+21
0.11395	5.7387e+21	5.8712e+21	6.0702e+21	6.1826e+21	6.2417e+21	6.2801e+21	6.2524e+21	6.3348e+21	6.3959e+21	6.4491e+21	6.4476e+21	6.4356e+21	6.5645e+21	6.5326e+21
0.1166	5.9567e+21	6.0704e+21	6.2837e+21	6.3997e+21	6.4133e+21	6.4057e+21	6.4466e+21	6.468e+21	6.5501e+21	6.6007e+21	6.6064e+21	6.6146e+21	6.7069e+21	6.6898e+21
0.11925	6.1817e+21	6.2747e+21	6.4539e+21	6.5702e+21	6.5974e+21	6.5579e+21	6.6169e+21	6.5747e+21	6.7272e+21	6.8123e+21	6.7341e+21	6.7638e+21	6.8961e+21	6.8648e+21
0.1219	6.3763e+21	6.4833e+21	6.6092e+21	6.7535e+21	6.7594e+21	6.7416e+21	6.7934e+21	6.717e+21	6.8871e+21	6.9597e+21	6.8829e+21	6.8978e+21	7.0502e+21	6.9628e+21
0.12455	6.5361e+21	6.6523e+21	6.7636e+21	6.8955e+21	6.9056e+21	6.9198e+21	6.9675e+21	6.9074e+21	7.0191e+21	7.0189e+21	7.0209e+21	7.0382e+21	7.1404e+21	7.0744e+21
0.1272	6.6572e+21	6.7861e+21	6.8931e+21	6.9936e+21	7.039e+21	7.0558e+21	7.0667e+21	6.9897e+21	7.0907e+21	7.1265e+21	7.1024e+21	7.1402e+21	7.1841e+21	7.2006e+21
0.12985	6.787e+21	6.8922e+21	6.9944e+21	7.0929e+21	7.1183e+21	7.1359e+21	7.1181e+21	7.0719e+21	7.1353e+21	7.2245e+21	7.1826e+21	7.2092e+21	7.2587e+21	7.317e+21
0.1325	6.902e+21	7.0006e+21	7.1191e+21	7.2338e+21	7.2327e+21	7.2589e+21	7.2236e+21	7.1805e+21	7.1804e+21	7.2816e+21	7.2751e+21	7.3386e+21	7.3952e+21	7.3953e+21
0.13515	7.0237e+21	7.1106e+21	7.2093e+21	7.3277e+21	7.3207e+21	7.3468e+21	7.3257e+21	7.2855e+21	7.2236e+21	7.335e+21	7.4014e+21	7.4451e+21	7.4687e+21	7.4383e+21
0.1378	7.1562e+21	7.2101e+21	7.2614e+21	7.3855e+21	7.3935e+21	7.3903e+21	7.4e+21	7.3718e+21	7.3552e+21	7.461e+21	7.4889e+21	7.4908e+21	7.4947e+21	7.4747e+21
0.14045	7.2572e+21	7.3008e+21	7.3323e+21	7.4594e+21	7.4573e+21	7.4283e+21	7.4672e+21	7.4506e+21	7.4516e+21	7.5413e+21	7.4993e+21	7.4953e+21	7.5403e+21	7.5488e+21
0.1431	7.3206e+21	7.3256e+21	7.4072e+21	7.5221e+21	7.4708e+21	7.4706e+21	7.5173e+21	7.4617e+21	7.4771e+21	7.575e+21	7.5325e+21	7.5092e+21	7.6006e+21	7.6352e+21
0.14575	7.3626e+21	7.3382e+21	7.4802e+21	7.5545e+21	7.5347e+21	7.5307e+21	7.6074e+21	7.5263e+21	7.5551e+21	7.6435e+21	7.5924e+21	7.5852e+21	7.6124e+21	7.6782e+21
0.1484	7.4454e+21	7.3856e+21	7.56e+21	7.6193e+21	7.5878e+21	7.6456e+21	7.6671e+21	7.596e+21	7.6246e+21	7.7115e+21	7.62e+21	7.5947e+21	7.6076e+21	7.7059e+21
0.15105	7.5059e+21	7.4244e+21	7.6326e+21	7.6517e+21	7.6229e+21	7.702e+21	7.6862e+21	7.6632e+21	7.6527e+21	7.7061e+21	7.6047e+21	7.6157e+21	7.6511e+21	7.7061e+21
0.1537	7.5307e+21	7.4605e+21	7.625e+21	7.7014e+21	7.6436e+21	7.7436e+21	7.6795e+21	7.672e+21	7.6448e+21	7.699e+21	7.593e+21	7.5924e+21	7.6925e+21	7.7147e+21
0.15635	7.5346e+21	7.5481e+21	7.6331e+21	7.7239e+21	7.6754e+21	7.7062e+21	7.7026e+21	7.6406e+21	7.6314e+21	7.6797e+21	7.5847e+21	7.5403e+21	7.7112e+21	7.7482e+21
0.159	7.5236e+21	7.599e+21	7.6959e+21	7.6866e+21	7.6518e+21	7.7093e+21	7.6861e+21	7.6458e+21	7.6289e+21	7.6993e+21	7.637e+21	7.5965e+21	7.6549e+21	7.7317e+21
0.16165	7.5758e+21	7.6362e+21	7.6957e+21	7.6706e+21	7.6495e+21	7.7032e+21	7.6917e+21	7.6939e+21	7.6489e+21	7.746e+21	7.7003e+21	7.6511e+21	7.6814e+21	7.7149e+21
0.1643	7.6028e+21	7.6186e+21	7.7013e+21	7.6884e+21	7.6808e+21	7.6894e+21	7.7501e+21	7.6812e+21	7.7181e+21	7.7176e+21	7.6781e+21	7.6788e+21	7.6976e+21	7.6874e+21
0.16695	7.6724e+21	7.6358e+21	7.702e+21	7.6987e+21	7.7193e+21	7.7015e+21	7.7511e+21	7.6943e+21	7.7307e+21	7.715e+21	7.7185e+21	7.706e+21	7.7446e+21	7.7076e+21
0.1696	7.727e+21	7.6866e+21	7.687e+21	7.712e+21	7.7453e+21	7.7184e+21	7.7622e+21	7.6861e+21	7.7368e+21	7.7379e+21	7.7565e+21	7.7572e+21	7.7661e+21	7.7566e+21
0.17225	7.7361e+21	7.6814e+21	7.7314e+21	7.7496e+21	7.7451e+21	7.7531e+21	7.7881e+21	7.7255e+21	7.7541e+21	7.7968e+21	7.7958e+21	7.8497e+21	7.8307e+21	7.8116e+21
0.1749	7.7521e+21	7.733e+21	7.7895e+21	7.7934e+21	7.7694e+21	7.8154e+21	7.845e+21	7.7678e+21	7.8082e+21	7.832e+21	7.8248e+21	7.8805e+21	7.8377e+21	7.8114e+21
0.17755	7.7235e+21	7.8343e+21	7.8603e+21	7.8246e+21	7.8056e+21	7.8644e+21	7.8851e+21	7.7951e+21	7.8328e+21	7.7955e+21	7.8021e+21	7.8527e+21	7.7982e+21	7.8078e+21
0.1802	7.7467e+21	7.8123e+21	7.8544e+21	7.8199e+21	7.7962e+21	7.8999e+21	7.8368e+21	7.8257e+21	7.838e+21	7.8394e+21	7.7827e+21	7.8086e+21	7.7716e+21	7.8013e+21
0.18285	7.729e+21	7.8022e+21	7.8675e+21	7.8248e+21	7.7726e+21	7.881e+21	7.8136e+21	7.8733e+21	7.768e+21	7.8805e+21	7.7793e+21	7.7886e+21	7.7715e+21	7.7541e+21
0.1855	7.739e+21	7.72e+21	7.9019e+21	7.8191e+21	7.7564e+21	7.8549e+21	7.7612e+21	7.8747e+21	7.7219e+21	7.8369e+21	7.7713e+21	7.7991e+21	7.755e+21	7.686e+21
0.18815	7.7645e+21	7.7028e+21	7.8699e+21	7.7757e+21	7.7186e+21	7.8263e+21	7.7361e+21	7.8636e+21	7.7151e+21	7.7884e+21	7.7181e+21	7.8176e+21	7.7461e+21	7.7222e+21
0.1908	7.7422e+21	7.7055e+21	7.8226e+21	7.7511e+21	7.726e+21	7.845e+21	7.6662e+21	7.8698e+21	7.7479e+21	7.7283e+21	7.6773e+21	7.8078e+21	7.7196e+21	7.7701e+21
0.19345	7.7225e+21	7.7447e+21	7.7964e+21	7.782e+21	7.7118e+21	7.8066e+21	7.6527e+21	7.8284e+21	7.7422e+21	7.7221e+21	7.6526e+21	7.7445e+21	7.7533e+21	7.7083e+21
0.1961	7.7536e+21	7.7604e+21	7.8115e+21	7.7592e+21	7.7174e+21	7.8023e+21	7.7162e+21	7.7877e+21	7.7413e+21	7.7332e+21	7.6618e+21	7.7375e+21	7.7581e+21	7.728e+21
0.19875	7.7245e+21	7.7646e+21	7.8294e+21	7.8144e+21	7.7307e+21	7.8037e+21	7.7256e+21	7.827e+21	7.7266e+21	7.7716e+21	7.7081e+21	7.7409e+21	7.7409e+21	7.738e+21
0.2014	7.7479e+21	7.767e+21	7.8346e+21	7.7957e+21	7.7737e+21	7.8029e+21	7.7192e+21	7.8424e+21	7.6754e+21	7.7694e+21	7.7438e+21	7.8109e+21	7.7025e+21	7.6953e+21
0.20405	7.7921e+21	7.7811e+21	7.8243e+21	7.7805e+21	7.7948e+21	7.8412e+21	7.718e+21	7.8416e+21	7.682e+21	7.7179e+21	7.7972e+21	7.8081e+21	7.7127e+21	7.6674e+21
0.2067	7.7584e+21	7.7212e+21	7.8142e+21	7.7603e+21	7.7838e+21	7.8415e+21	7.733e+21	7.8157e+21	7.6824e+21	7.7383e+21	7.7705e+21	7.8401e+21	7.7717e+21	7.7179e+21
0.20935	7.7314e+21	7.712e+21	7.843e+21	7.7445e+21	7.7883e+21	7.8331e+21	7.7401e+21	7.8144e+21	7.6722e+21	7.7837e+21	7.7635e+21	7.8632e+21	7.8466e+21	7.7749e+21
0.212	7.7554e+21	7.7166e+21	7.8279e+21	7.7878e+21	7.804e+21	7.872e+21	7.7299e+21	7.8383e+21	7.704e+21	7.8499e+21	7.8033e+21	7.8838e+21	7.8148e+21	7.807e+21
0.21465	7.7618e+21	7.7743e+21	7.8491e+21	7.8375e+21	7.8193e+21	7.8676e+21	7.7186e+21	7.8294e+21	7.7644e+21	7.8427e+21	7.7791e+21	7.826e+21	7.7539e+21	7.8376e+21
0.2173	7.7797e+21	7.7643e+21	7.9122e+21	7.8543e+21	7.8178e+21	7.8341e+21	7.7477e+21	7.8637e+21	7.7708e+21	7.8418e+21	7.7692e+21	7.769e+21	7.7626e+21	7.8273e+21
0.21995	7.8099e+21	7.7722e+21	7.8972e+21	7.8463e+21	7.7812e+21	7.821e+21	7.7841e+21	7.8381e+21	7.7249e+21	7.8721e+21	7.745e+21	7.7557e+21	7.7799e+21	7.7785e+21
0.2226	7.7975e+21	7.7856e+21	7.8643e+21	7.8127e+21	7.7379e+21	7.8304e+21	7.7933e+21	7.8136e+21	7.6887e+21	7.8102e+21	7.7591e+21	7.7809e+21	7.7288e+21	7.7627e+21
0.22525	7.8411e+21	7.7921e+21	7.8565e+21	7.7849e+21	7.7231e+21	7.8052e+21	7.7795e+21	7.7877e+21	7.6904e+21	7.7843e+21	7.7513e+21	7.7474e+21	7.7095e+21	7.7658e+21
0.2279	7.8903e+21	7.758e+21	7.8589e+21	7.7688e+21	7.7747e+21	7.8258e+21	7.7178e+21	7.7619e+21	7.6994e+21	7.8159e+21	7.7456e+21	7.7402e+21	7.7038e+21	7.7685e+21
0.23055	7.9016e+21	7.7853e+21	7.839e+21	7.7855e+21	7.8345e+21	7.8636e+21	7.7807e+21	7.7777e+21	7.6753e+21	7.8173e+21	7.7758e+21	7.7222e+21	7.749e+21	7.7478e+21
0.2332	7.9099e+21	7.8118e+21	7.8314e+21	7.8455e+21	7.8384e+21	7.8897e+21	7.7965e+21	7.8065e+21	7.67e+21	7.8122e+21	7.7917e+21	7.6856e+21	7.73e+21	7.7042e+21
0.23585	7.8647e+21	7.8922e+21	7.8478e+21	7.8721e+21	7.8596e+21	7.8674e+21	7.7695e+21	7.7798e+21	7.6835e+21	7.787e+21	7.7362e+21	7.6706e+21	7.7165e+21	7.6816e+21
0.2385	7.7978e+21	7.8633e+21	7.786e+21	7.8543e+21	7.7767e+21	7.8445e+21	7.7517e+21	7.7458e+21	7.6998e+21	7.7583e+21	7.7215e+21	7.6489e+21	7.7302e+21	7.6709e+21
0.24115	7.7662e+21	7.8045e+21	7.6936e+21	7.8333e+21	7.7105e+21	7.8298e+21	7.7513e+21	7.7181e+21	7.7041e+21	7.8034e+21	7.7346e+21	7.7014e+21	7.7501e+21	7.717e+21
0.2438	7.7493e+21	7.7719e+21	7.6627e+21	7.8323e+21	7.6446e+21	7.804e+21	7.7228e+21	7.7239e+21	7.7311e+21	7.835e+21	7.7227e+21	7.6872e+21	7.7498e+21	7.7495e+21
0.24645	7.7704e+21	7.7848e+21	7.6578e+21	7.8222e+21	7.6314e+21	7.7895e+21	7.6966e+21	7.7157e+21	7.7668e+21	7.8296e+21	7.74e+21	7.659e+21	7.8057e+21	7.7516e+21
0.2491	7.8095e+21	7.7733e+21	7.729e+21	7.7782e+21	7.6797e+21	7.8183e+21	7.7156e+21	7.7285e+21	7.7787e+21	7.8714e+21	7.7555e+21	7.7088e+21	7.8871e+21	7.7869e+21
0.25175	7.8497e+21	7.7967e+21	7.8144e+21	7.7891e+21	7.7521e+21	7.8512e+21	7.7342e+21	7.7647e+21	7.7675e+21	7.8408e+21	7.7552e+21	7.7399e+21	7.8352e+21	7.7803e+21
0.2544	7.8458e+21	7.8312e+21	7.8239e+21	7.8581e+21	7.8201e+21	7.8523e+21	7.7342e+21	7.7858e+21	7.8127e+21	7.7949e+21	7.74e+21	7.7417e+21	7.7772e+21	7.7755e+21
0.25705	7.8359e+21	7.8271e+21	7.8024e+21	7.8416e+21	7.8052e+21	7.8309e+21	7.7518e+21	7.7579e+21	7.866e+21	7.756e+21	7.7517e+21	7.704e+21	7.7887e+21	7.7366e+21
0.2597	7.8151e+21	7.7721e+21	7.8075e+21	7.8555e+21	7.7803e+21	7.8172e+21	7.7297e+21	7.782e+21	7.862e+21	7.7761e+21	7.7593e+21	7.7329e+21	7.8491e+21	7.7321e+21
0.26235	7.8056e+21	7.7841e+21	7.8259e+21	7.8823e+21	7.773e+21	7.8192e+21	7.7879e+21	7.7931e+21	7.8579e+21	7.7894e+21	7.7659e+21	7.7818e+21	7.7894e+21	7.734e+21
0.265	7.8268e+21	7.8323e+21	7.8444e+21	7.8573e+21	7.7609e+21	7.8806e+21	7.8125e+21	7.7961e+21	7.8442e+21	7.7964e+21	7.7788e+21	7.7971e+21	7.7097e+21	7.7431e+21
0.26765	7.8629e+21	7.9067e+21	7.8463e+21	7.8351e+21	7.7792e+21	7.9178e+21	7.7987e+21	7.8094e+21	7.79e+21	7.7725e+21	7.7663e+21	7.7717e+21	7.7222e+21	7.7675e+21
0.2703	7.8342e+21	7.8861e+21	7.8486e+21	7.8384e+21	7.783e+21	7.8989e+21	7.7607e+21	7.8223e+21	7.7724e+21	7.7887e+21	7.8091e+21	7.7714e+21	7.8051e+21	7.8095e+21
0.27295	7.8117e+21	7.8572e+21	7.8949e+21	7.867e+21	7.7537e+21	7.8977e+21	7.7771e+21	7.8243e+21	7.8138e+21	7.8213e+21	7.8319e+21	7.7923e+21	7.7819e+21	7.8195e+21
0.2756	7.819e+21	7.8856e+21	7.9053e+21	7.8649e+21	7.7814e+21	7.8904e+21	7.8125e+21	7.8666e+21	7.8347e+21	7.8421e+21	7.8088e+21	7.8252e+21	7.7471e+21	7.8222e+21
0.27825	7.8611e+21	7.859e+21	7.8587e+21	7.8725e+21	7.7786e+21	7.8387e+21	7.7957e+21	7.85e+21	7.8104e+21	7.8337e+21	7.8454e+21	7.8579e+21	7.7712e+21	7.7465e+21
0.2809	7.8794e+21	7.8551e+21	7.8097e+21	7.8553e+21	7.8023e+21	7.8256e+21	7.775e+21	7.8736e+21	7.7586e+21	7.8362e+21	7.806e+21	7.7971e+21	7.7911e+21	7.7197e+21
0.28355	7.8454e+21	7.843e+21	7.7678e+21	7.8291e+21	7.7806e+21	7.8574e+21	7.7543e+21	7.8514e+21	7.7498e+21	7.795e+21	7.7447e+21	7.7825e+21	7.7663e+21	7.7381e+21
0.2862	7.7968e+21	7.8134e+21	7.7376e+21	7.8142e+21	7.7681e+21	7.8772e+21	7.7752e+21	7.8269e+21	7.7694e+21	7.7599e+21	7.7484e+21	7.7845e+21	7.705e+21	7.7518e+21
0.28885	7.8095e+21	7.8204e+21	7.7663e+21	7.7912e+21	7.7777e+21	7.8434e+21	7.8059e+21	7.8198e+21	7.7867e+21	7.7423e+21	7.8106e+21	7.79e+21	7.6886e+21	7.7743e+21
0.2915	7.8187e+21	7.8104e+21	7.8012e+21	7.803e+21	7.8002e+21	7.7969e+21	7.7743e+21	7.8156e+21	7.8149e+21	7.7624e+21	7.8416e+21	7.8038e+21	7.6706e+21	7.7756e+21
0.29415	7.7844e+21	7.8171e+21	7.8138e+21	7.8104e+21	7.8463e+21	7.7781e+21	7.7793e+21	7.7543e+21	7.8145e+21	7.7489e+21	7.7906e+21	7.8247e+21	7.7108e+21	7.7607e+21
0.2968	7.7465e+21	7.8075e+21	7.8152e+21	7.8361e+21	7.8045e+21	7.7192e+21	7.7134e+21	7.8044e+21	7.7599e+21	7.8046e+21	7.7846e+21	7.8346e+21	7.8123e+21	7.7598e+21
0.29945	7.7497e+21	7.7993e+21	7.8443e+21	7.8283e+21	7.779e+21	7.7078e+21	7.7101e+21	7.8372e+21	7.7215e+21	7.8701e+21	7.8817e+21	7.8383e+21	7.8733e+21	7.8128e+21
0.3021	7.8316e+21	7.8147e+21	7.8519e+21	7.8139e+21	7.8189e+21	7.7665e+21	7.78e+21	7.817e+21	7.7184e+21	7.9069e+21	7.9004e+21	7.8668e+21	7.8573e+21	7.8655e+21
0.30475	7.8645e+21	7.8277e+21	7.8235e+21	7.8236e+21	7.8969e+21	7.786e+21	7.8682e+21	7.8037e+21	7.7426e+21	7.8822e+21	7.8228e+21	7.8561e+21	7.8679e+21	7.8186e+21
0.3074	7.874e+21	7.8065e+21	7.8315e+21	7.8342e+21	7.8873e+21	7.7622e+21	7.874e+21	7.7691e+21	7.7555e+21	7.8423e+21	7.7916e+21	7.8246e+21	7.8543e+21	7.7811e+21
0.31005	7.863e+21	7.7956e+21	7.7989e+21	7.823e+21	7.8367e+21	7.7228e+21	7.7889e+21	7.7736e+21	7.7798e+21	7.8356e+21	7.8022e+21	7.7797e+21	7.8403e+21	7.75e+21
0.3127	7.8155e+21	7.7856e+21	7.7889e+21	7.7863e+21	7.8394e+21	7.718e+21	7.7732e+21	7.7485e+21	7.7727e+21	7.8273e+21	7.7653e+21	7.7824e+21	7.7951e+21	7.7563e+21
0.31535	7.7611e+21	7.7449e+21	7.725e+21	7.7345e+21	7.8156e+21	7.7449e+21	7.7646e+21	7.7327e+21	7.7499e+21	7.7911e+21	7.7459e+21	7.7597e+21	7.7818e+21	7.7098e+21
0.318	7.7318e+21	7.6648e+21	7.6641e+21	7.6785e+21	7.7002e+21	7.7372e+21	7.7515e+21	7.6985e+21	7.6615e+21	7.735e+21	7.7003e+21	7.7187e+21	7.7527e+21	7.6626e+21
0.32065	7.6772e+21	7.602e+21	7.5824e+21	7.6102e+21	7.5938e+21	7.6902e+21	7.668e+21	7.5791e+21	7.5828e+21	7.6542e+21	7.6834e+21	7.664e+21	7.7481e+21	7.6396e+21
0.3233	7.559e+21	7.5387e+21	7.5277e+21	7.549e+21	7.5258e+21	7.596e+21	7.6142e+21	7.5456e+21	7.6043e+21	7.6086e+21	7.649e+21	7.6668e+21	7.7379e+21	7.616e+21
0.32595	7.5027e+21	7.5062e+21	7.5056e+21	7.5321e+21	7.5068e+21	7.5471e+21	7.5597e+21	7.5664e+21	7.6245e+21	7.5791e+21	7.6337e+21	7.625e+21	7.6764e+21	7.5239e+21
0.3286	7.479e+21	7.4648e+21	7.5256e+21	7.4859e+21	7.4394e+21	7.5332e+21	7.5236e+21	7.5306e+21	7.6082e+21	7.5405e+21	7.5452e+21	7.5685e+21	7.6467e+21	7.435e+21
0.33125	7.3868e+21	7.3962e+21	7.4163e+21	7.4236e+21	7.3872e+21	7.4832e+21	7.4552e+21	7.4565e+21	7.5424e+21	7.4936e+21	7.4835e+21	7.5273e+21	7.6515e+21	7.3674e+21
0.3339	7.2626e+21	7.285e+21	7.3211e+21	7.319e+21	7.3139e+21	7.4049e+21	7.3313e+21	7.397e+21	7.5051e+21	7.4325e+21	7.3758e+21	7.4383e+21	7.548e+21	7.3491e+21
0.33655	7.2125e+21	7.1789e+21	7.2263e+21	7.2286e+21	7.2346e+21	7.3602e+21	7.2715e+21	7.296e+21	7.4476e+21	7.3298e+21	7.3024e+21	7.3546e+21	7.4608e+21	7.3529e+21
0.3392	7.0995e+21	7.0832e+21	7.1357e+21	7.1013e+21	7.1652e+21	7.2204e+21	7.2359e+21	7.2098e+21	7.3272e+21	7.2364e+21	7.2703e+21	7.29e+21	7.3576e+21	7.2876e+21
0.34185	7.0057e+21	6.9753e+21	7.0002e+21	6.997e+21	7.0725e+21	7.0853e+21	7.1323e+21	7.0932e+21	7.2078e+21	7.1731e+21	7.2395e+21	7.2719e+21	7.2258e+21	7.1938e+21
0.3445	6.8476e+21	6.8496e+21	6.8408e+21	6.8564e+21	6.9531e+21	6.9789e+21	6.9527e+21	6.9768e+21	7.1027e+21	7.0804e+21	7.1696e+21	7.1857e+21	7.1554e+21	7.0691e+21
0.34715	6.6943e+21	6.6728e+21	6.5958e+21	6.7061e+21	6.8091e+21	6.8628e+21	6.8305e+21	6.8924e+21	6.9779e+21	6.9773e+21	7.0915e+21	7.0604e+21	7.0382e+21	6.8946e+21
0.3498	6.485e+21	6.4244e+21	6.3691e+21	6.4741e+21	6.5275e+21	6.6827e+21	6.6828e+21	6.7875e+21	6.7929e+21	6.8122e+21	6.8885e+21	6.9021e+21	6.8784e+21	6.7306e+21
0.35245	6.2741e+21	6.1365e+21	6.1395e+21	6.1956e+21	6.2316e+21	6.4038e+21	6.4942e+21	6.5799e+21	6.607e+21	6.5803e+21	6.6556e+21	6.7167e+21	6.6991e+21	6.5356e+21
0.3551	6.0284e+21	5.8687e+21	5.9224e+21	5.9337e+21	5.9826e+21	6.1569e+21	6.2475e+21	6.3633e+21	6.4066e+21	6.3684e+21	6.4295e+21	6.5025e+21	6.5178e+21	6.3803e+21
0.35775	5.7012e+21	5.5948e+21	5.6391e+21	5.6461e+21	5.7612e+21	5.8828e+21	6.0357e+21	6.0952e+21	6.1482e+21	6.1895e+21	6.2349e+21	6.2605e+21	6.327e+21	6.2678e+21
0.3604	5.4184e+21	5.3089e+21	5.3932e+21	5.3593e+21	5.5274e+21	5.5881e+21	5.757e+21	5.8492e+21	5.9689e+21	6.0147e+21	6.0546e+21	5.9888e+21	6.1023e+21	6.0217e+21
0.36305	5.226e+21	5.1397e+21	5.2126e+21	5.2153e+21	5.3135e+21	5.4338e+21	5.5514e+21	5.6128e+21	5.7175e+21	5.8028e+21	5.8158e+21	5.7926e+21	5.8619e+21	5.7936e+21
0.3657	5.08e+21	5.0144e+21	5.0884e+21	5.0933e+21	5.1446e+21	5.2306e+21	5.3188e+21	5.4071e+21	5.4681e+21	5.645e+21	5.581e+21	5.5828e+21	5.6936e+21	5.6146e+21
0.36835	4.9604e+21	4.9184e+21	4.938e+21	4.9488e+21	4.9943e+21	5.0738e+21	5.1291e+21	5.2256e+21	5.2985e+21	5.407e+21	5.4031e+21	5.3651e+21	5.5275e+21	5.4103e+21
0.371	4.8477e+21	4.8554e+21	4.8499e+21	4.8585e+21	4.8807e+21	4.9391e+21	4.9674e+21	5.1099e+21	5.1341e+21	5.1923e+21	5.2764e+21	5.2015e+21	5.3262e+21	5.2974e+21
0.37365	4.8115e+21	4.7929e+21	4.803e+21	4.7842e+21	4.8312e+21	4.8322e+21	4.861e+21	4.9955e+21	5.0282e+21	5.0762e+21	5.1162e+21	5.0655e+21	5.2045e+21	5.2238e+21
0.3763	4.7578e+21	4.7502e+21	4.7385e+21	4.7197e+21	4.781e+21	4.7638e+21	4.8069e+21	4.8894e+21	4.9043e+21	4.9641e+21	4.9813e+21	4.9557e+21	5.0838e+21	5.1435e+21
0.37895	4.725e+21	4.7389e+21	4.6978e+21	4.6812e+21	4.7418e+21	4.7233e+21	4.7174e+21	4.8133e+21	4.8011e+21	4.858e+21	4.886e+21	4.8773e+21	4.9789e+21	5.0585e+21
0.3816	4.6644e+21	4.7046e+21	4.6756e+21	4.6453e+21	4.6856e+21	4.6596e+21	4.6632e+21	4.7451e+21	4.7324e+21	4.7581e+21	4.7956e+21	4.7887e+21	4.9058e+21	5.0039e+21
0.38425	4.6338e+21	4.6858e+21	4.6418e+21	4.6145e+21	4.635e+21	4.6234e+21	4.6209e+21	4.6779e+21	4.667e+21	4.7083e+21	4.7222e+21	4.7325e+21	4.8222e+21	4.9535e+21
0.3869	4.611e+21	4.6666e+21	4.5849e+21	4.6024e+21	4.574e+21	4.5941e+21	4.5764e+21	4.624e+21	4.642e+21	4.644e+21	4.6679e+21	4.6983e+21	4.7702e+21	4.9453e+21
0.38955	4.5706e+21	4.6098e+21	4.549e+21	4.5588e+21	4.5289e+21	4.5325e+21	4.5376e+21	4.5684e+21	4.6192e+21	4.6204e+21	4.6545e+21	4.6856e+21	4.7423e+21	4.8961e+21
0.3922	4.515e+21	4.5587e+21	4.526e+21	4.5198e+21	4.4953e+21	4.463e+21	4.5053e+21	4.5055e+21	4.5952e+21	4.6076e+21	4.6074e+21	4.6214e+21	4.6609e+21	4.8301e+21
0.39485	4.4868e+21	4.4914e+21	4.5039e+21	4.5086e+21	4.4426e+21	4.4367e+21	4.4616e+21	4.4831e+21	4.5547e+21	4.5635e+21	4.54e+21	4.558e+21	4.6081e+21	4.7934e+21
0.3975	4.4223e+21	4.4509e+21	4.4476e+21	4.4507e+21	4.3692e+21	4.4148e+21	4.4303e+21	4.4491e+21	4.5022e+21	4.5168e+21	4.501e+21	4.5263e+21	4.5691e+21	4.7722e+21
0.40015	4.4007e+21	4.4376e+21	4.4424e+21	4.4007e+21	4.3327e+21	4.4194e+21	4.4048e+21	4.4455e+21	4.4337e+21	4.4638e+21	4.4858e+21	4.4811e+21	4.5388e+21	4.7444e+21
0.4028	4.398e+21	4.4238e+21	4.4295e+21	4.3737e+21	4.3436e+21	4.4148e+21	4.3912e+21	4.4281e+21	4.3768e+21	4.4165e+21	4.427e+21	4.4727e+21	4.529e+21	4.698e+21
0.40545	4.4039e+21	4.4077e+21	4.3911e+21	4.342e+21	4.3348e+21	4.3818e+21	4.3413e+21	4.3911e+21	4.3804e+21	4.3951e+21	4.3952e+21	4.4385e+21	4.5296e+21	4.6586e+21
0.4081	4.3899e+21	4.3659e+21	4.3638e+21	4.3378e+21	4.3328e+21	4.3552e+21	4.3315e+21	4.3623e+21	4.374e+21	4.4003e+21	4.3941e+21	4.42e+21	4.5079e+21	4.6605e+21
0.41075	4.3949e+21	4.3577e+21	4.3682e+21	4.339e+21	4.3198e+21	4.323e+21	4.2933e+21	4.3703e+21	4.3603e+21	4.4061e+21	4.3973e+21	4.4005e+21	4.4862e+21	4.649e+21
0.4134	4.3788e+21	4.345e+21	4.3582e+21	4.3707e+21	4.3223e+21	4.3303e+21	4.2887e+21	4.3498e+21	4.3519e+21	4.3951e+21	4.4103e+21	4.3697e+21	4.4541e+21	4.6172e+21
0.41605	4.3863e+21	4.3605e+21	4.378e+21	4.3608e+21	4.352e+21	4.3299e+21	4.2725e+21	4.3346e+21	4.3172e+21	4.3601e+21	4.3893e+21	4.3392e+21	4.4214e+21	4.5941e+21
0.4187	4.3788e+21	4.3561e+21	4.381e+21	4.3465e+21	4.2989e+21	4.3064e+21	4.2825e+21	4.3163e+21	4.2868e+21	4.3024e+21	4.3384e+21	4.325e+21	4.3935e+21	4.5587e+21
0.42135	4.3477e+21	4.3388e+21	4.3489e+21	4.3176e+21	4.2652e+21	4.262e+21	4.2728e+21	4.2938e+21	4.2543e+21	4.2898e+21	4.3235e+21	4.3064e+21	4.3601e+21	4.5068e+21
0.424	4.3237e+21	4.3021e+21	4.3268e+21	4.2959e+21	4.2538e+21	4.2493e+21	4.2577e+21	4.2753e+21	4.2659e+21	4.3004e+21	4.3026e+21	4.2899e+21	4.3087e+21	4.4721e+21
0.42665	4.3143e+21	4.275e+21	4.3162e+21	4.2756e+21	4.2425e+21	4.2688e+21	4.2451e+21	4.2746e+21	4.2486e+21	4.2883e+21	4.2758e+21	4.2967e+21	4.273e+21	4.4767e+21
0.4293	4.2896e+21	4.2832e+21	4.295e+21	4.2754e+21	4.208e+21	4.2722e+21	4.2277e+21	4.2606e+21	4.2278e+21	4.273e+21	4.2716e+21	4.3081e+21	4.2644e+21	4.4399e+21
0.43195	4.2949e+21	4.2854e+21	4.2868e+21	4.2448e+21	4.2167e+21	4.2671e+21	4.2213e+21	4.2513e+21	4.2115e+21	4.2372e+21	4.2362e+21	4.3207e+21	4.28e+21	4.4097e+21
0.4346	4.315e+21	4.2731e+21	4.2578e+21	4.2385e+21	4.2343e+21	4.2494e+21	4.2219e+21	4.2601e+21	4.1951e+21	4.2306e+21	4.2476e+21	4.317e+21	4.2787e+21	4.3935e+21
0.43725	4.3066e+21	4.2321e+21	4.222e+21	4.2487e+21	4.2468e+21	4.2327e+21	4.2219e+21	4.2536e+21	4.1848e+21	4.2237e+21	4.2607e+21	4.2968e+21	4.2714e+21	4.4052e+21
0.4399	4.2985e+21	4.2283e+21	4.1974e+21	4.2343e+21	4.2462e+21	4.2246e+21	4.2224e+21	4.2272e+21	4.1825e+21	4.2041e+21	4.2674e+21	4.2906e+21	4.2818e+21	4.3933e+21
0.44255	4.2948e+21	4.2325e+21	4.1966e+21	4.2312e+21	4.2374e+21	4.2095e+21	4.2146e+21	4.2144e+21	4.1689e+21	4.2225e+21	4.254e+21	4.2529e+21	4.2633e+21	4.363e+21
0.4452	4.2966e+21	4.2602e+21	4.1947e+21	4.2538e+21	4.2082e+21	4.2107e+21	4.2081e+21	4.2269e+21	4.1706e+21	4.2226e+21	4.2357e+21	4.2058e+21	4.2168e+21	4.332e+21
0.44785	4.2715e+21	4.2597e+21	4.1955e+21	4.2497e+21	4.1807e+21	4.1785e+21	4.1952e+21	4.1875e+21	4.1625e+21	4.1946e+21	4.2186e+21	4.1751e+21	4.2071e+21	4.3112e+21
0.4505	4.2609e+21	4.2282e+21	4.1856e+21	4.2112e+21	4.1628e+21	4.1646e+21	4.1784e+21	4.1553e+21	4.1702e+21	4.1926e+21	4.1921e+21	4.1666e+21	4.1933e+21	4.3048e+21
0.45315	4.25e+21	4.1925e+21	4.172e+21	4.1738e+21	4.1647e+21	4.1309e+21	4.1705e+21	4.1426e+21	4.1853e+21	4.1941e+21	4.183e+21	4.1761e+21	4.1916e+21	4.2917e+21
0.4558	4.2277e+21	4.1849e+21	4.1992e+21	4.1851e+21	4.1773e+21	4.1395e+21	4.1704e+21	4.1424e+21	4.1688e+21	4.1897e+21	4.2085e+21	4.1907e+21	4.1936e+21	4.3118e+21
0.45845	4.2145e+21	4.1722e+21	4.1875e+21	4.1932e+21	4.1796e+21	4.1586e+21	4.1901e+21	4.1351e+21	4.1323e+21	4.1703e+21	4.1948e+21	4.1784e+21	4.1774e+21	4.3224e+21
0.4611	4.2104e+21	4.172e+21	4.1717e+21	4.175e+21	4.1648e+21	4.1312e+21	4.1781e+21	4.1189e+21	4.1352e+21	4.1656e+21	4.1644e+21	4.1845e+21	4.1681e+21	4.3225e+21
0.46375	4.1952e+21	4.1746e+21	4.1579e+21	4.1698e+21	4.1578e+21	4.1261e+21	4.1709e+21	4.1388e+21	4.1643e+21	4.1614e+21	4.1352e+21	4.1937e+21	4.1814e+21	4.2929e+21
0.4664	4.1924e+21	4.1567e+21	4.1566e+21	4.1836e+21	4.1628e+21	4.1346e+21	4.1596e+21	4.1528e+21	4.1375e+21	4.1589e+21	4.144e+21	4.1815e+21	4.1748e+21	4.2764e+21
0.46905	4.2218e+21	4.1621e+21	4.1478e+21	4.1562e+21	4.1811e+21	4.1522e+21	4.1691e+21	4.1393e+21	4.1e+21	4.1344e+21	4.1305e+21	4.1645e+21	4.1563e+21	4.2636e+21
0.4717	4.2282e+21	4.1651e+21	4.1245e+21	4.1277e+21	4.1644e+21	4.1597e+21	4.1358e+21	4.1129e+21	4.0839e+21	4.1298e+21	4.1251e+21	4.1228e+21	4.1324e+21	4.2562e+21
0.47435	4.2158e+21	4.168e+21	4.1112e+21	4.0845e+21	4.1224e+21	4.1504e+21	4.0981e+21	4.1134e+21	4.0923e+21	4.1273e+21	4.1032e+21	4.1184e+21	4.1004e+21	4.2581e+21
0.477	4.2019e+21	4.1725e+21	4.1115e+21	4.0841e+21	4.1202e+21	4.151e+21	4.0833e+21	4.1324e+21	4.1157e+21	4.1011e+21	4.0964e+21	4.1363e+21	4.1101e+21	4.2375e+21
0.47965	4.1802e+21	4.157e+21	4.1022e+21	4.0894e+21	4.0956e+21	4.1337e+21	4.0952e+21	4.1407e+21	4.106e+21	4.0784e+21	4.1079e+21	4.1257e+21	4.0813e+21	4.1925e+21
0.4823	4.139e+21	4.1269e+21	4.1005e+21	4.0764e+21	4.0682e+21	4.1191e+21	4.0858e+21	4.1215e+21	4.053e+21	4.0562e+21	4.0875e+21	4.0955e+21	4.0447e+21	4.1707e+21
0.48495	4.118e+21	4.1038e+21	4.0988e+21	4.0596e+21	4.0862e+21	4.1202e+21	4.0802e+21	4.0979e+21	4.0101e+21	4.0592e+21	4.0747e+21	4.0692e+21	4.0232e+21	4.1365e+21
0.4876	4.1231e+21	4.0675e+21	4.1295e+21	4.0449e+21	4.0892e+21	4.1203e+21	4.0745e+21	4.0936e+21	3.9759e+21	4.0382e+21	4.0698e+21	4.0606e+21	4.0284e+21	4.1201e+21
0.49025	4.1302e+21	4.0405e+21	4.1443e+21	4.0081e+21	4.0601e+21	4.0871e+21	4.0755e+21	4.0626e+21	3.9687e+21	4.0499e+21	4.051e+21	4.0652e+21	4.0294e+21	4.102e+21
0.4929	4.1324e+21	4.0508e+21	4.1208e+21	4.0002e+21	4.0631e+21	4.0758e+21	4.077e+21	4.0508e+21	3.9701e+21	4.0506e+21	4.0274e+21	4.0621e+21	4.0454e+21	4.1133e+21
0.49555	4.1052e+21	4.0461e+21	4.0677e+21	4.0143e+21	4.0435e+21	4.0835e+21	4.0699e+21	4.0258e+21	3.9763e+21	4.0241e+21	4.0473e+21	4.0588e+21	4.0373e+21	4.1267e+21
0.4982	4.0945e+21	4.0513e+21	4.048e+21	4.0304e+21	4.0234e+21	4.0845e+21	4.0557e+21	4.019e+21	3.9888e+21	4.041e+21	4.0366e+21	4.039e+21	4.0307e+21	4.1106e+21
0.50085	4.0864e+21	4.0544e+21	4.0553e+21	4.0309e+21	3.9925e+21	4.0691e+21	4.0604e+21	4.025e+21	3.9883e+21	4.0395e+21	4.0353e+21	4.0197e+21	4.0137e+21	4.0905e+21
0.5035	4.0664e+21	4.0636e+21	4.0718e+21	4.0443e+21	4.0018e+21	4.0886e+21	4.055e+21	4.0297e+21	3.9793e+21	4.0291e+21	4.0359e+21	4.0359e+21	4.0154e+21	4.0896e+21
0.50615	4.0781e+21	4.0656e+21	4.0775e+21	4.0606e+21	3.9966e+21	4.0925e+21	4.0485e+21	4.0132e+21	3.9416e+21	3.9986e+21	4.0097e+21	4.0451e+21	4.0222e+21	4.083e+21
0.5088	4.0771e+21	4.0565e+21	4.0621e+21	4.0553e+21	3.9876e+21	4.0971e+21	4.0293e+21	3.9821e+21	3.9361e+21	3.9761e+21	3.9966e+21	4.0601e+21	4.0102e+21	4.0604e+21
0.51145	4.0802e+21	4.0291e+21	4.0608e+21	4.0495e+21	3.9867e+21	4.0817e+21	4.0276e+21	3.9743e+21	3.9299e+21	3.959e+21	3.9905e+21	4.0453e+21	3.9929e+21	4.047e+21
0.5141	4.0534e+21	4.0472e+21	4.0634e+21	4.0368e+21	3.9684e+21	4.079e+21	4.0162e+21	3.9635e+21	3.9225e+21	3.9498e+21	3.9995e+21	4.0187e+21	3.9726e+21	4.0639e+21
0.51675	4.0425e+21	4.0309e+21	4.0389e+21	4.0287e+21	3.9675e+21	4.0387e+21	4.0257e+21	3.9413e+21	3.9052e+21	3.9451e+21	4.0123e+21	3.9987e+21	3.9927e+21	4.0575e+21
0.5194	4.0342e+21	4.0087e+21	4.0274e+21	4.0382e+21	3.9724e+21	3.9811e+21	4.0294e+21	3.9421e+21	3.9256e+21	3.9558e+21	4.0237e+21	3.9808e+21	4.0074e+21	4.0676e+21
0.52205	4.0341e+21	4.0244e+21	4.038e+21	4.0172e+21	3.9903e+21	3.9939e+21	4.0182e+21	3.9551e+21	3.9331e+21	3.9874e+21	4.0032e+21	3.9664e+21	4.0212e+21	4.0582e+21
0.5247	4.0227e+21	4.0331e+21	4.0325e+21	3.9883e+21	4.0152e+21	4.0105e+21	4.021e+21	3.9431e+21	3.9301e+21	3.9878e+21	3.9954e+21	3.943e+21	4.0033e+21	4.0418e+21
0.52735	4.0274e+21	4.0306e+21	4.0343e+21	3.9883e+21	4.0193e+21	3.9913e+21	4.003e+21	3.9431e+21	3.9167e+21	3.9823e+21	4.0028e+21	3.9364e+21	3.9789e+21	4.0371e+21
0.53	4.0367e+21	4.0148e+21	4.0417e+21	3.9801e+21	4.019e+21	3.9735e+21	3.9755e+21	3.9255e+21	3.9145e+21	3.9804e+21	3.9932e+21	3.9315e+21	3.9788e+21	4.0334e+21
0.53265	4.019e+21	4.0081e+21	4.029e+21	3.9776e+21	4.0337e+21	3.9673e+21	3.9642e+21	3.9058e+21	3.8944e+21	3.9506e+21	3.9824e+21	3.955e+21	3.9826e+21	4.0243e+21
0.5353	4.0009e+21	3.9598e+21	4.0152e+21	3.9886e+21	4.0115e+21	3.9998e+21	3.9774e+21	3.918e+21	3.9123e+21	3.9547e+21	3.9861e+21	3.9357e+21	3.9663e+21	3.9967e+21
0.53795	4.0041e+21	3.9415e+21	4.0174e+21	4.0088e+21	3.9764e+21	4.0153e+21	3.9934e+21	3.9159e+21	3.9316e+21	3.9578e+21	3.9802e+21	3.93e+21	3.9711e+21	3.9977e+21
0.5406	4.015e+21	3.9509e+21	4.0177e+21	3.9983e+21	3.9514e+21	4.0021e+21	3.9748e+21	3.8957e+21	3.9134e+21	3.9239e+21	3.969e+21	3.9314e+21	3.9553e+21	3.9875e+21
0.54325	4.0001e+21	3.9488e+21	3.9968e+21	3.9857e+21	3.9436e+21	4.0054e+21	3.9467e+21	3.883e+21	3.9067e+21	3.9074e+21	3.931e+21	3.9244e+21	3.9234e+21	3.9589e+21
0.5459	3.9797e+21	3.9303e+21	3.9595e+21	3.9861e+21	3.9267e+21	3.9957e+21	3.9336e+21	3.9026e+21	3.8789e+21	3.8963e+21	3.909e+21	3.8916e+21	3.8945e+21	3.9152e+21
0.54855	3.9492e+21	3.9053e+21	3.9477e+21	3.963e+21	3.8892e+21	3.9577e+21	3.9023e+21	3.8942e+21	3.8747e+21	3.8804e+21	3.8958e+21	3.8955e+21	3.8583e+21	3.8696e+21
0.5512	3.9174e+21	3.8959e+21	3.9443e+21	3.9437e+21	3.9067e+21	3.9342e+21	3.9032e+21	3.8675e+21	3.8715e+21	3.8558e+21	3.888e+21	3.8925e+21	3.8291e+21	3.8527e+21
0.55385	3.9147e+21	3.892e+21	3.9328e+21	3.9049e+21	3.9101e+21	3.9232e+21	3.9002e+21	3.8822e+21	3.8626e+21	3.8251e+21	3.8905e+21	3.8811e+21	3.8624e+21	3.8545e+21
0.5565	3.9087e+21	3.8857e+21	3.9103e+21	3.9176e+21	3.9175e+21	3.9263e+21	3.875e+21	3.875e+21	3.8633e+21	3.8293e+21	3.9068e+21	3.8752e+21	3.8949e+21	3.8627e+21
0.55915	3.896e+21	3.8637e+21	3.8932e+21	3.9225e+21	3.9498e+21	3.9021e+21	3.8648e+21	3.8677e+21	3.8435e+21	3.7997e+21	3.9015e+21	3.8519e+21	3.8701e+21	3.8576e+21
0.5618	3.889e+21	3.8658e+21	3.8987e+21	3.9299e+21	3.9243e+21	3.8694e+21	3.867e+21	3.8575e+21	3.8144e+21	3.8003e+21	3.8826e+21	3.845e+21	3.8426e+21	3.8773e+21
0.56445	3.8849e+21	3.873e+21	3.9177e+21	3.9178e+21	3.893e+21	3.8692e+21	3.8549e+21	3.8599e+21	3.8208e+21	3.8029e+21	3.8781e+21	3.8469e+21	3.8363e+21	3.9009e+21
0.5671	3.8759e+21	3.8558e+21	3.899e+21	3.9412e+21	3.9121e+21	3.8778e+21	3.8576e+21	3.8825e+21	3.806e+21	3.8051e+21	3.854e+21	3.8292e+21	3.8161e+21	3.8812e+21
0.56975	3.8516e+21	3.8354e+21	3.8693e+21	3.9285e+21	3.9185e+21	3.8589e+21	3.8453e+21	3.8707e+21	3.8015e+21	3.8162e+21	3.8209e+21	3.8229e+21	3.8076e+21	3.8753e+21
0.5724	3.827e+21	3.8511e+21	3.8523e+21	3.9189e+21	3.9208e+21	3.8371e+21	3.8268e+21	3.8585e+21	3.8122e+21	3.8526e+21	3.8186e+21	3.8318e+21	3.8126e+21	3.8628e+21
0.57505	3.8312e+21	3.8667e+21	3.8704e+21	3.9355e+21	3.8964e+21	3.8106e+21	3.8211e+21	3.8579e+21	3.8226e+21	3.8588e+21	3.8387e+21	3.8485e+21	3.8144e+21	3.8631e+21
0.5777	3.8385e+21	3.8715e+21	3.8699e+21	3.9356e+21	3.8718e+21	3.8046e+21	3.83e+21	3.8418e+21	3.814e+21	3.8679e+21	3.8593e+21	3.8415e+21	3.8167e+21	3.8462e+21
0.58035	3.8136e+21	3.8658e+21	3.8975e+21	3.9037e+21	3.8776e+21	3.8147e+21	3.8463e+21	3.8423e+21	3.8152e+21	3.856e+21	3.8697e+21	3.8455e+21	3.7955e+21	3.8556e+21
0.583	3.8039e+21	3.8477e+21	3.9313e+21	3.8717e+21	3.8787e+21	3.8073e+21	3.8285e+21	3.8234e+21	3.8326e+21	3.8589e+21	3.8773e+21	3.8387e+21	3.7944e+21	3.8592e+21
0.58565	3.832e+21	3.875e+21	3.9348e+21	3.8702e+21	3.8631e+21	3.8205e+21	3.8425e+21	3.8439e+21	3.8286e+21	3.8445e+21	3.8619e+21	3.817e+21	3.8064e+21	3.8537e+21
0.5883	3.8548e+21	3.8703e+21	3.9214e+21	3.859e+21	3.8494e+21	3.8214e+21	3.8479e+21	3.8426e+21	3.8221e+21	3.8293e+21	3.8391e+21	3.7996e+21	3.7994e+21	3.8535e+21
0.59095	3.8399e+21	3.8778e+21	3.8871e+21	3.8644e+21	3.8247e+21	3.8233e+21	3.8416e+21	3.8388e+21	3.795e+21	3.8535e+21	3.8158e+21	3.8031e+21	3.7904e+21	3.8344e+21
0.5936	3.8291e+21	3.8676e+21	3.8699e+21	3.8614e+21	3.7904e+21	3.8198e+21	3.8443e+21	3.7826e+21	3.7567e+21	3.8239e+21	3.7865e+21	3.8151e+21	3.7738e+21	3.8007e+21
0.59625	3.8276e+21	3.8664e+21	3.8483e+21	3.858e+21	3.7747e+21	3.8162e+21	3.8077e+21	3.7752e+21	3.7338e+21	3.8037e+21	3.7806e+21	3.8127e+21	3.763e+21	3.7959e+21
0.5989	3.8223e+21	3.8332e+21	3.8089e+21	3.8549e+21	3.7672e+21	3.7825e+21	3.7904e+21	3.7772e+21	3.7332e+21	3.8016e+21	3.7903e+21	3.7889e+21	3.7495e+21	3.8107e+21
0.60155	3.8003e+21	3.7867e+21	3.8073e+21	3.8225e+21	3.7485e+21	3.7701e+21	3.7957e+21	3.7618e+21	3.7455e+21	3.8044e+21	3.7874e+21	3.7633e+21	3.7386e+21	3.8119e+21
0.6042	3.7816e+21	3.7825e+21	3.807e+21	3.7976e+21	3.7718e+21	3.7943e+21	3.7932e+21	3.7469e+21	3.751e+21	3.7975e+21	3.7725e+21	3.7764e+21	3.7442e+21	3.7944e+21
0.60685	3.7769e+21	3.794e+21	3.8194e+21	3.8084e+21	3.7828e+21	3.7887e+21	3.7912e+21	3.7542e+21	3.774e+21	3.7758e+21	3.7735e+21	3.7687e+21	3.7372e+21	3.7795e+21
0.6095	3.7618e+21	3.7885e+21	3.8437e+21	3.8046e+21	3.7976e+21	3.7737e+21	3.7801e+21	3.771e+21	3.7794e+21	3.7705e+21	3.7682e+21	3.7549e+21	3.7338e+21	3.7682e+21
0.61215	3.7574e+21	3.7891e+21	3.81e+21	3.7931e+21	3.7638e+21	3.7528e+21	3.7402e+21	3.7526e+21	3.7328e+21	3.7664e+21	3.7776e+21	3.7559e+21	3.7225e+21	3.7725e+21
0.6148	3.7835e+21	3.7752e+21	3.8037e+21	3.7709e+21	3.7343e+21	3.7286e+21	3.7274e+21	3.7393e+21	3.7385e+21	3.7554e+21	3.783e+21	3.7537e+21	3.7329e+21	3.7832e+21
0.61745	3.7912e+21	3.777e+21	3.8063e+21	3.7818e+21	3.7379e+21	3.7249e+21	3.7274e+21	3.7406e+21	3.7359e+21	3.7588e+21	3.7445e+21	3.7441e+21	3.7291e+21	3.7539e+21
0.6201	3.8141e+21	3.7833e+21	3.802e+21	3.7799e+21	3.7547e+21	3.732e+21	3.7342e+21	3.7425e+21	3.7285e+21	3.7589e+21	3.7276e+21	3.7339e+21	3.7143e+21	3.7297e+21
0.62275	3.776e+21	3.7599e+21	3.7699e+21	3.738e+21	3.7716e+21	3.7359e+21	3.7302e+21	3.724e+21	3.7027e+21	3.7401e+21	3.7054e+21	3.6936e+21	3.6911e+21	3.7126e+21
0.6254	3.7551e+21	3.733e+21	3.742e+21	3.7253e+21	3.7352e+21	3.7132e+21	3.7207e+21	3.7061e+21	3.682e+21	3.7111e+21	3.696e+21	3.6753e+21	3.6875e+21	3.7029e+21
0.62805	3.7375e+21	3.7351e+21	3.7223e+21	3.7364e+21	3.6999e+21	3.7144e+21	3.702e+21	3.6945e+21	3.6527e+21	3.697e+21	3.6942e+21	3.6892e+21	3.6676e+21	3.682e+21
0.6307	3.7292e+21	3.7413e+21	3.707e+21	3.7287e+21	3.6758e+21	3.7123e+21	3.7054e+21	3.7041e+21	3.65e+21	3.694e+21	3.6752e+21	3.6994e+21	3.649e+21	3.662e+21
0.63335	3.7184e+21	3.7364e+21	3.7138e+21	3.7093e+21	3.6846e+21	3.6874e+21	3.684e+21	3.7082e+21	3.6348e+21	3.6629e+21	3.6418e+21	3.6959e+21	3.6201e+21	3.6413e+21
0.636	3.6885e+21	3.7189e+21	3.7135e+21	3.7105e+21	3.6952e+21	3.6773e+21	3.6634e+21	3.7026e+21	3.618e+21	3.6531e+21	3.6346e+21	3.6648e+21	3.6127e+21	3.6569e+21
0.63865	3.6977e+21	3.7085e+21	3.6851e+21	3.6933e+21	3.691e+21	3.6936e+21	3.6377e+21	3.7049e+21	3.62e+21	3.631e+21	3.6344e+21	3.6495e+21	3.6183e+21	3.6604e+21
0.6413	3.6982e+21	3.6833e+21	3.6561e+21	3.6827e+21	3.6576e+21	3.6814e+21	3.6219e+21	3.6874e+21	3.6158e+21	3.6256e+21	3.6267e+21	3.6414e+21	3.6312e+21	3.6504e+21
0.64395	3.6714e+21	3.6698e+21	3.6346e+21	3.6667e+21	3.6725e+21	3.6622e+21	3.6448e+21	3.66e+21	3.6317e+21	3.6296e+21	3.6186e+21	3.6159e+21	3.6358e+21	3.6426e+21
0.6466	3.6701e+21	3.6555e+21	3.6589e+21	3.6438e+21	3.7005e+21	3.6645e+21	3.627e+21	3.6337e+21	3.6195e+21	3.6159e+21	3.6001e+21	3.6319e+21	3.6243e+21	3.6606e+21
0.64925	3.6796e+21	3.6694e+21	3.6527e+21	3.634e+21	3.6819e+21	3.6469e+21	3.6269e+21	3.6429e+21	3.5738e+21	3.6156e+21	3.6023e+21	3.6315e+21	3.6274e+21	3.6684e+21
0.6519	3.6447e+21	3.6813e+21	3.6503e+21	3.6295e+21	3.6569e+21	3.6532e+21	3.6409e+21	3.6708e+21	3.551e+21	3.5932e+21	3.6042e+21	3.6393e+21	3.6241e+21	3.6478e+21
0.65455	3.616e+21	3.663e+21	3.6571e+21	3.6442e+21	3.6415e+21	3.6425e+21	3.6513e+21	3.6484e+21	3.5487e+21	3.6003e+21	3.6115e+21	3.6548e+21	3.5802e+21	3.6477e+21
0.6572	3.6141e+21	3.6289e+21	3.6652e+21	3.6608e+21	3.6453e+21	3.6454e+21	3.6556e+21	3.6334e+21	3.5787e+21	3.6231e+21	3.6009e+21	3.6182e+21	3.562e+21	3.6173e+21
0.65985	3.6172e+21	3.6373e+21	3.669e+21	3.6637e+21	3.6341e+21	3.6171e+21	3.658e+21	3.6181e+21	3.5731e+21	3.6321e+21	3.5881e+21	3.5945e+21	3.5696e+21	3.596e+21
0.6625	3.6232e+21	3.6424e+21	3.6692e+21	3.6401e+21	3.6119e+21	3.5833e+21	3.6325e+21	3.6145e+21	3.5795e+21	3.62e+21	3.584e+21	3.5795e+21	3.5544e+21	3.6024e+21
0.66515	3.6335e+21	3.6396e+21	3.6457e+21	3.6409e+21	3.6141e+21	3.5466e+21	3.624e+21	3.5941e+21	3.5686e+21	3.5959e+21	3.5547e+21	3.5985e+21	3.5479e+21	3.6143e+21
0.6678	3.6306e+21	3.6203e+21	3.6266e+21	3.6109e+21	3.617e+21	3.5466e+21	3.6012e+21	3.6027e+21	3.5467e+21	3.5865e+21	3.5693e+21	3.5781e+21	3.5437e+21	3.6171e+21
0.67045	3.6077e+21	3.6169e+21	3.6277e+21	3.5824e+21	3.5859e+21	3.5507e+21	3.586e+21	3.6071e+21	3.5199e+21	3.556e+21	3.5769e+21	3.5873e+21	3.5115e+21	3.6048e+21
0.6731	3.5886e+21	3.6049e+21	3.6019e+21	3.5794e+21	3.573e+21	3.5404e+21	3.5616e+21	3.597e+21	3.5466e+21	3.5461e+21	3.5804e+21	3.5917e+21	3.5355e+21	3.6073e+21
0.67575	3.5915e+21	3.5842e+21	3.5431e+21	3.5738e+21	3.5654e+21	3.5399e+21	3.5511e+21	3.573e+21	3.5571e+21	3.5618e+21	3.5739e+21	3.5752e+21	3.544e+21	3.604e+21
0.6784	3.5941e+21	3.5608e+21	3.5179e+21	3.5673e+21	3.5475e+21	3.5546e+21	3.5585e+21	3.5608e+21	3.5481e+21	3.5483e+21	3.5495e+21	3.5541e+21	3.5279e+21	3.574e+21
0.68105	3.5633e+21	3.5612e+21	3.5041e+21	3.56e+21	3.5367e+21	3.5544e+21	3.5569e+21	3.5558e+21	3.5214e+21	3.5395e+21	3.5153e+21	3.5168e+21	3.5312e+21	3.5651e+21
0.6837	3.5446e+21	3.5354e+21	3.5144e+21	3.5495e+21	3.5267e+21	3.5479e+21	3.5218e+21	3.5439e+21	3.5087e+21	3.5225e+21	3.5253e+21	3.5178e+21	3.5262e+21	3.5635e+21
0.68635	3.5347e+21	3.5194e+21	3.5429e+21	3.5341e+21	3.5457e+21	3.5395e+21	3.5107e+21	3.5148e+21	3.5199e+21	3.5124e+21	3.5278e+21	3.5249e+21	3.5169e+21	3.5562e+21
0.689	3.5541e+21	3.5114e+21	3.5365e+21	3.5448e+21	3.5518e+21	3.5435e+21	3.5313e+21	3.4896e+21	3.5218e+21	3.5056e+21	3.5399e+21	3.5374e+21	3.498e+21	3.544e+21
0.69165	3.539e+21	3.5079e+21	3.511e+21	3.5598e+21	3.5326e+21	3.5394e+21	3.5724e+21	3.4939e+21	3.5429e+21	3.5005e+21	3.5706e+21	3.5405e+21	3.4683e+21	3.5189e+21
0.6943	3.5162e+21	3.5108e+21	3.5138e+21	3.5577e+21	3.5353e+21	3.5426e+21	3.5888e+21	3.5067e+21	3.537e+21	3.473e+21	3.5609e+21	3.5373e+21	3.4698e+21	3.4894e+21
0.69695	3.5042e+21	3.5137e+21	3.5351e+21	3.5451e+21	3.5344e+21	3.5288e+21	3.5795e+21	3.5144e+21	3.5238e+21	3.4708e+21	3.5437e+21	3.5256e+21	3.4692e+21	3.4921e+21
0.6996	3.503e+21	3.4886e+21	3.5145e+21	3.5592e+21	3.5028e+21	3.5069e+21	3.5699e+21	3.5152e+21	3.5387e+21	3.4941e+21	3.5516e+21	3.4983e+21	3.4633e+21	3.5071e+21
0.70225	3.4948e+21	3.473e+21	3.5162e+21	3.5361e+21	3.4847e+21	3.5072e+21	3.5261e+21	3.4873e+21	3.5205e+21	3.4811e+21	3.5327e+21	3.4818e+21	3.4313e+21	3.508e+21
0.7049	3.474e+21	3.4594e+21	3.5072e+21	3.5318e+21	3.5018e+21	3.4945e+21	3.502e+21	3.4865e+21	3.5172e+21	3.468e+21	3.4793e+21	3.467e+21	3.4125e+21	3.4772e+21
0.70755	3.444e+21	3.4625e+21	3.4984e+21	3.5052e+21	3.5025e+21	3.4651e+21	3.4813e+21	3.5038e+21	3.4951e+21	3.479e+21	3.4765e+21	3.459e+21	3.4178e+21	3.4659e+21
0.7102	3.4409e+21	3.4736e+21	3.4916e+21	3.5076e+21	3.4797e+21	3.4675e+21	3.4887e+21	3.5026e+21	3.4608e+21	3.4605e+21	3.4719e+21	3.425e+21	3.422e+21	3.457e+21
0.71285	3.4251e+21	3.4717e+21	3.4675e+21	3.5028e+21	3.4464e+21	3.4784e+21	3.453e+21	3.4812e+21	3.4264e+21	3.4503e+21	3.4604e+21	3.4357e+21	3.4168e+21	3.4511e+21
0.7155	3.4377e+21	3.4657e+21	3.4311e+21	3.4699e+21	3.4359e+21	3.4624e+21	3.4227e+21	3.47e+21	3.4178e+21	3.4514e+21	3.4217e+21	3.437e+21	3.4111e+21	3.4328e+21
0.71815	3.463e+21	3.4614e+21	3.4438e+21	3.4705e+21	3.4594e+21	3.452e+21	3.4285e+21	3.457e+21	3.4185e+21	3.4362e+21	3.4104e+21	3.4103e+21	3.3879e+21	3.3998e+21
0.7208	3.4466e+21	3.484e+21	3.4594e+21	3.4534e+21	3.46e+21	3.4361e+21	3.4389e+21	3.449e+21	3.4067e+21	3.415e+21	3.4282e+21	3.398e+21	3.3902e+21	3.3745e+21
0.72345	3.4018e+21	3.4683e+21	3.4232e+21	3.4417e+21	3.4248e+21	3.4196e+21	3.4385e+21	3.4203e+21	3.4133e+21	3.4114e+21	3.4501e+21	3.3866e+21	3.3959e+21	3.3973e+21
0.7261	3.3886e+21	3.4397e+21	3.3894e+21	3.4289e+21	3.3883e+21	3.424e+21	3.4383e+21	3.4125e+21	3.3945e+21	3.3997e+21	3.4427e+21	3.389e+21	3.3768e+21	3.4085e+21
0.72875	3.389e+21	3.4452e+21	3.3974e+21	3.426e+21	3.372e+21	3.4372e+21	3.4411e+21	3.4095e+21	3.4041e+21	3.3897e+21	3.4316e+21	3.3895e+21	3.3818e+21	3.4053e+21
0.7314	3.3988e+21	3.425e+21	3.4122e+21	3.4386e+21	3.3917e+21	3.4182e+21	3.4342e+21	3.4087e+21	3.4107e+21	3.3728e+21	3.4161e+21	3.3766e+21	3.3758e+21	3.395e+21
0.73405	3.4031e+21	3.3885e+21	3.4011e+21	3.4192e+21	3.3949e+21	3.398e+21	3.4328e+21	3.4068e+21	3.4163e+21	3.3647e+21	3.4122e+21	3.3753e+21	3.3737e+21	3.4083e+21
0.7367	3.4035e+21	3.3685e+21	3.3847e+21	3.3983e+21	3.3927e+21	3.3897e+21	3.4442e+21	3.4147e+21	3.4054e+21	3.3637e+21	3.3893e+21	3.3841e+21	3.3611e+21	3.3957e+21
0.73935	3.3962e+21	3.359e+21	3.3734e+21	3.4186e+21	3.3907e+21	3.3915e+21	3.4352e+21	3.4148e+21	3.4007e+21	3.364e+21	3.3496e+21	3.392e+21	3.3544e+21	3.3676e+21
0.742	3.3771e+21	3.3357e+21	3.3638e+21	3.4272e+21	3.3923e+21	3.3902e+21	3.4075e+21	3.4148e+21	3.3947e+21	3.3322e+21	3.3312e+21	3.3799e+21	3.3554e+21	3.3187e+21
0.74465	3.3151e+21	3.3128e+21	3.3356e+21	3.4161e+21	3.3501e+21	3.3654e+21	3.379e+21	3.3776e+21	3.3557e+21	3.3178e+21	3.3656e+21	3.3845e+21	3.3705e+21	3.3285e+21
0.7473	3.2732e+21	3.2933e+21	3.3009e+21	3.3944e+21	3.3299e+21	3.3369e+21	3.3464e+21	3.3691e+21	3.326e+21	3.2995e+21	3.3728e+21	3.3857e+21	3.3437e+21	3.3306e+21
0.74995	3.2682e+21	3.2897e+21	3.2769e+21	3.3607e+21	3.3399e+21	3.3238e+21	3.3181e+21	3.3604e+21	3.332e+21	3.2968e+21	3.3529e+21	3.3813e+21	3.3439e+21	3.2931e+21
0.7526	3.2717e+21	3.3068e+21	3.2621e+21	3.3281e+21	3.2972e+21	3.3181e+21	3.3166e+21	3.3633e+21	3.3258e+21	3.2914e+21	3.3376e+21	3.3365e+21	3.3052e+21	3.252e+21
0.75525	3.2661e+21	3.2865e+21	3.2686e+21	3.3293e+21	3.2772e+21	3.3074e+21	3.2992e+21	3.3439e+21	3.2776e+21	3.2515e+21	3.3112e+21	3.3097e+21	3.2581e+21	3.2416e+21
0.7579	3.2401e+21	3.2627e+21	3.2553e+21	3.2806e+21	3.2819e+21	3.2857e+21	3.267e+21	3.3013e+21	3.2479e+21	3.2613e+21	3.3076e+21	3.2945e+21	3.2355e+21	3.2487e+21
0.76055	3.2355e+21	3.2545e+21	3.2467e+21	3.2567e+21	3.2715e+21	3.2743e+21	3.2571e+21	3.2795e+21	3.2362e+21	3.2651e+21	3.3011e+21	3.2641e+21	3.2253e+21	3.241e+21
0.7632	3.2025e+21	3.2594e+21	3.2525e+21	3.2518e+21	3.249e+21	3.249e+21	3.2419e+21	3.2771e+21	3.2113e+21	3.2304e+21	3.2967e+21	3.2615e+21	3.2218e+21	3.2409e+21
0.76585	3.1677e+21	3.2485e+21	3.2246e+21	3.2539e+21	3.2325e+21	3.2268e+21	3.2427e+21	3.2714e+21	3.2076e+21	3.2166e+21	3.2808e+21	3.269e+21	3.2085e+21	3.2232e+21
0.7685	3.1654e+21	3.2403e+21	3.2244e+21	3.2637e+21	3.2374e+21	3.214e+21	3.2477e+21	3.2535e+21	3.1989e+21	3.1987e+21	3.2529e+21	3.2804e+21	3.2056e+21	3.2218e+21
0.77115	3.179e+21	3.2436e+21	3.234e+21	3.2512e+21	3.2258e+21	3.2279e+21	3.241e+21	3.2432e+21	3.205e+21	3.1674e+21	3.2452e+21	3.2632e+21	3.1966e+21	3.2213e+21
0.7738	3.1915e+21	3.2631e+21	3.2443e+21	3.2354e+21	3.2367e+21	3.2499e+21	3.2405e+21	3.2248e+21	3.1793e+21	3.1851e+21	3.2346e+21	3.2571e+21	3.1972e+21	3.2405e+21
0.77645	3.1891e+21	3.2553e+21	3.2572e+21	3.2507e+21	3.2391e+21	3.236e+21	3.2257e+21	3.2175e+21	3.1863e+21	3.1917e+21	3.2303e+21	3.2409e+21	3.2016e+21	3.2442e+21
0.7791	3.1902e+21	3.2354e+21	3.2512e+21	3.2474e+21	3.2356e+21	3.2004e+21	3.2096e+21	3.2277e+21	3.1853e+21	3.199e+21	3.2428e+21	3.2305e+21	3.2065e+21	3.2312e+21
0.78175	3.1907e+21	3.2308e+21	3.2413e+21	3.2311e+21	3.2372e+21	3.2018e+21	3.1954e+21	3.2275e+21	3.2016e+21	3.2129e+21	3.2555e+21	3.2231e+21	3.2105e+21	3.2472e+21
0.7844	3.189e+21	3.2301e+21	3.2256e+21	3.2315e+21	3.2739e+21	3.2082e+21	3.1924e+21	3.2318e+21	3.221e+21	3.2149e+21	3.2334e+21	3.2377e+21	3.2142e+21	3.2498e+21
0.78705	3.1899e+21	3.2342e+21	3.2251e+21	3.2246e+21	3.2661e+21	3.2081e+21	3.1752e+21	3.2369e+21	3.2429e+21	3.2235e+21	3.2074e+21	3.2355e+21	3.2246e+21	3.2517e+21
0.7897	3.1786e+21	3.2278e+21	3.224e+21	3.2135e+21	3.2233e+21	3.2063e+21	3.1872e+21	3.2543e+21	3.2278e+21	3.2212e+21	3.1983e+21	3.248e+21	3.2214e+21	3.2138e+21
0.79235	3.1701e+21	3.211e+21	3.2266e+21	3.1897e+21	3.2057e+21	3.2193e+21	3.2298e+21	3.2101e+21	3.2094e+21	3.1974e+21	3.2012e+21	3.2368e+21	3.205e+21	3.1993e+21
0.795	3.1548e+21	3.2051e+21	3.2219e+21	3.1914e+21	3.2005e+21	3.1853e+21	3.2188e+21	3.1659e+21	3.2122e+21	3.1911e+21	3.1842e+21	3.195e+21	3.1716e+21	3.1933e+21
0.79765	3.1592e+21	3.1888e+21	3.2147e+21	3.2046e+21	3.216e+21	3.1789e+21	3.2057e+21	3.1695e+21	3.218e+21	3.1574e+21	3.1685e+21	3.1714e+21	3.1625e+21	3.1908e+21
0.8003	3.1575e+21	3.1422e+21	3.2048e+21	3.208e+21	3.1982e+21	3.1653e+21	3.2021e+21	3.1538e+21	3.184e+21	3.1501e+21	3.1511e+21	3.1815e+21	3.1642e+21	3.1915e+21
0.80295	3.1621e+21	3.1387e+21	3.1735e+21	3.1882e+21	3.1776e+21	3.161e+21	3.1892e+21	3.1188e+21	3.1712e+21	3.1695e+21	3.1607e+21	3.1608e+21	3.1698e+21	3.1957e+21
0.8056	3.163e+21	3.144e+21	3.165e+21	3.1882e+21	3.1927e+21	3.1642e+21	3.1806e+21	3.1378e+21	3.1425e+21	3.155e+21	3.1738e+21	3.1405e+21	3.1627e+21	3.1884e+21
0.80825	3.1154e+21	3.1233e+21	3.1536e+21	3.1764e+21	3.1744e+21	3.1441e+21	3.1766e+21	3.1262e+21	3.1402e+21	3.1151e+21	3.1617e+21	3.1171e+21	3.1562e+21	3.1736e+21
0.8109	3.084e+21	3.1309e+21	3.1577e+21	3.1578e+21	3.1614e+21	3.1407e+21	3.1563e+21	3.1182e+21	3.1551e+21	3.1115e+21	3.1434e+21	3.1079e+21	3.171e+21	3.1873e+21
0.81355	3.0943e+21	3.116e+21	3.1806e+21	3.1582e+21	3.1525e+21	3.1628e+21	3.1565e+21	3.1298e+21	3.1646e+21	3.1265e+21	3.1375e+21	3.1319e+21	3.1875e+21	3.1759e+21
0.8162	3.1196e+21	3.1192e+21	3.173e+21	3.2063e+21	3.161e+21	3.1659e+21	3.1778e+21	3.1576e+21	3.1659e+21	3.1584e+21	3.1549e+21	3.1454e+21	3.1781e+21	3.1609e+21
0.81885	3.122e+21	3.1074e+21	3.1482e+21	3.1832e+21	3.1877e+21	3.1453e+21	3.1656e+21	3.1779e+21	3.1568e+21	3.1516e+21	3.1434e+21	3.127e+21	3.1616e+21	3.1616e+21
0.8215	3.1081e+21	3.1107e+21	3.1434e+21	3.1424e+21	3.1645e+21	3.1281e+21	3.1607e+21	3.1613e+21	3.1289e+21	3.1285e+21	3.1438e+21	3.0945e+21	3.174e+21	3.1785e+21
0.82415	3.1135e+21	3.0943e+21	3.1656e+21	3.1229e+21	3.1168e+21	3.1229e+21	3.1446e+21	3.1462e+21	3.1196e+21	3.1077e+21	3.1379e+21	3.1311e+21	3.1579e+21	3.1788e+21
0.8268	3.1093e+21	3.0953e+21	3.1531e+21	3.1263e+21	3.1026e+21	3.1529e+21	3.1456e+21	3.1315e+21	3.1159e+21	3.0847e+21	3.1074e+21	3.1246e+21	3.1477e+21	3.1809e+21
0.82945	3.0913e+21	3.0983e+21	3.1153e+21	3.143e+21	3.0843e+21	3.1425e+21	3.159e+21	3.1129e+21	3.1034e+21	3.0662e+21	3.0959e+21	3.138e+21	3.159e+21	3.1701e+21
0.8321	3.0597e+21	3.0719e+21	3.093e+21	3.1364e+21	3.0872e+21	3.1153e+21	3.1483e+21	3.0961e+21	3.1016e+21	3.0643e+21	3.1034e+21	3.1349e+21	3.184e+21	3.1584e+21
0.83475	3.0693e+21	3.0818e+21	3.1035e+21	3.1329e+21	3.1085e+21	3.1137e+21	3.1577e+21	3.1017e+21	3.1217e+21	3.0875e+21	3.107e+21	3.1117e+21	3.2028e+21	3.1594e+21
0.8374	3.0858e+21	3.0877e+21	3.128e+21	3.126e+21	3.1106e+21	3.1067e+21	3.1857e+21	3.1132e+21	3.1333e+21	3.1004e+21	3.0956e+21	3.1233e+21	3.1963e+21	3.1558e+21
0.84005	3.0778e+21	3.088e+21	3.1302e+21	3.1181e+21	3.1212e+21	3.108e+21	3.1976e+21	3.1089e+21	3.0926e+21	3.103e+21	3.0831e+21	3.1302e+21	3.1853e+21	3.1492e+21
0.8427	3.0757e+21	3.0692e+21	3.1326e+21	3.1037e+21	3.1173e+21	3.1092e+21	3.1736e+21	3.0826e+21	3.1059e+21	3.1103e+21	3.0835e+21	3.1371e+21	3.175e+21	3.1408e+21
0.84535	3.0719e+21	3.0555e+21	3.1273e+21	3.102e+21	3.109e+21	3.0773e+21	3.1287e+21	3.0816e+21	3.1106e+21	3.1031e+21	3.0706e+21	3.123e+21	3.1463e+21	3.1238e+21
0.848	3.0648e+21	3.0604e+21	3.12e+21	3.1073e+21	3.1149e+21	3.0798e+21	3.0923e+21	3.0675e+21	3.1011e+21	3.0868e+21	3.0767e+21	3.0986e+21	3.1337e+21	3.1118e+21
0.85065	3.0445e+21	3.0601e+21	3.0887e+21	3.0993e+21	3.1098e+21	3.0871e+21	3.0888e+21	3.0715e+21	3.0906e+21	3.0761e+21	3.0633e+21	3.0995e+21	3.113e+21	3.0969e+21
0.8533	3.0348e+21	3.0478e+21	3.0676e+21	3.0982e+21	3.1061e+21	3.065e+21	3.0949e+21	3.0763e+21	3.0817e+21	3.0809e+21	3.0454e+21	3.092e+21	3.095e+21	3.1066e+21
0.85595	3.032e+21	3.0376e+21	3.0513e+21	3.0794e+21	3.0928e+21	3.0571e+21	3.0806e+21	3.075e+21	3.1049e+21	3.0769e+21	3.0621e+21	3.088e+21	3.0932e+21	3.0956e+21
0.8586	3.0163e+21	3.0439e+21	3.0343e+21	3.0532e+21	3.0806e+21	3.0165e+21	3.0674e+21	3.074e+21	3.0957e+21	3.0563e+21	3.0572e+21	3.0849e+21	3.0764e+21	3.0764e+21
0.86125	3.0057e+21	3.0388e+21	3.0294e+21	3.0596e+21	3.0432e+21	3.0248e+21	3.0503e+21	3.0545e+21	3.063e+21	3.0491e+21	3.035e+21	3.0861e+21	3.076e+21	3.0543e+21
0.8639	3.0089e+21	3.043e+21	3.0124e+21	3.0432e+21	3.0258e+21	3.0403e+21	3.0344e+21	3.0357e+21	3.0366e+21	3.0137e+21	3.0477e+21	3.0932e+21	3.0609e+21	3.0689e+21
0.86655	3.015e+21	3.0584e+21	3.0291e+21	3.0469e+21	3.0301e+21	3.0482e+21	3.029e+21	3.0716e+21	3.0334e+21	2.9885e+21	3.0513e+21	3.0925e+21	3.0611e+21	3.0907e+21
0.8692	3.0173e+21	3.0607e+21	3.0334e+21	3.0315e+21	3.0498e+21	3.0459e+21	3.0254e+21	3.0876e+21	3.0312e+21	2.9875e+21	3.0354e+21	3.075e+21	3.0644e+21	3.0959e+21
0.87185	3.025e+21	3.0191e+21	3.0371e+21	3.0124e+21	3.0499e+21	3.0231e+21	3.0306e+21	3.0732e+21	3.0255e+21	3.0002e+21	3.0297e+21	3.0705e+21	3.0489e+21	3.1009e+21
0.8745	3.0341e+21	2.9865e+21	3.0337e+21	3.0166e+21	3.0623e+21	3.0287e+21	3.0061e+21	3.0445e+21	3.0222e+21	3.0001e+21	3.0124e+21	3.0505e+21	3.0358e+21	3.0695e+21
0.87715	3.0294e+21	2.9884e+21	3.0192e+21	3.047e+21	3.049e+21	2.9943e+21	3.0188e+21	3.0221e+21	3.0336e+21	3e+21	3.0026e+21	3.0079e+21	3.0292e+21	3.0189e+21
0.8798	3.0045e+21	2.9963e+21	3.0213e+21	3.0577e+21	3.0318e+21	2.9911e+21	3.0043e+21	3.0302e+21	3.0074e+21	2.9944e+21	3.0217e+21	3.0093e+21	3.0034e+21	3.0128e+21
0.88245	2.9733e+21	2.9687e+21	2.9863e+21	3.0409e+21	3.0182e+21	2.9941e+21	2.9752e+21	3.0236e+21	2.9936e+21	2.9921e+21	3.0055e+21	3.0173e+21	2.9983e+21	3.0388e+21
0.8851	2.9404e+21	2.9586e+21	2.9692e+21	3.0246e+21	3.0246e+21	2.9949e+21	2.9573e+21	3.0116e+21	3.0121e+21	2.9923e+21	3.0088e+21	3.0002e+21	3.0049e+21	3.0443e+21
0.88775	2.9313e+21	2.9687e+21	2.9735e+21	3.0355e+21	3.0189e+21	2.9988e+21	2.9528e+21	3.0132e+21	3.0225e+21	3.0073e+21	3.0209e+21	3.0083e+21	3.0234e+21	3.0356e+21
0.8904	2.9341e+21	2.9815e+21	2.9701e+21	3.0366e+21	2.9944e+21	3.026e+21	2.9662e+21	3.0142e+21	3.0259e+21	3.0101e+21	3.0156e+21	3.0149e+21	3.0294e+21	3.0357e+21
0.89305	2.9505e+21	2.9837e+21	3.0044e+21	3.0188e+21	2.983e+21	3.0302e+21	3.0045e+21	3.0073e+21	3.006e+21	3.0315e+21	3.0066e+21	3.0115e+21	3.0179e+21	3.0244e+21
0.8957	2.9411e+21	2.9839e+21	3.013e+21	2.9959e+21	2.9734e+21	3.0086e+21	2.9936e+21	2.9883e+21	3.0146e+21	3.0576e+21	3.0177e+21	3.0165e+21	3.0142e+21	3.0373e+21
0.89835	2.9591e+21	2.9949e+21	3.0112e+21	2.9956e+21	2.9739e+21	3.017e+21	2.9865e+21	2.9729e+21	3.0096e+21	3.0317e+21	3.0239e+21	3.0307e+21	3.0045e+21	3.0464e+21
0.901	2.9512e+21	2.9901e+21	3.0159e+21	2.9963e+21	2.9904e+21	3.0248e+21	2.9734e+21	2.9891e+21	2.9933e+21	3.0108e+21	3.0203e+21	3.033e+21	2.9849e+21	3.0253e+21
0.90365	2.8955e+21	2.9761e+21	2.9989e+21	2.9885e+21	2.9916e+21	3.0116e+21	2.9381e+21	2.9695e+21	2.9604e+21	2.9952e+21	2.9804e+21	3.0056e+21	2.9709e+21	3.013e+21
0.9063	2.8685e+21	2.95e+21	2.974e+21	2.9778e+21	2.973e+21	2.9927e+21	2.9156e+21	2.9495e+21	2.9239e+21	2.9946e+21	2.9762e+21	2.9905e+21	2.9846e+21	3.0132e+21
0.90895	2.8888e+21	2.9384e+21	2.9704e+21	2.9817e+21	2.9534e+21	2.9717e+21	2.9316e+21	2.9408e+21	2.9385e+21	2.9851e+21	2.9733e+21	2.972e+21	2.9652e+21	2.9865e+21
0.9116	2.9094e+21	2.9176e+21	2.9814e+21	2.9904e+21	2.9607e+21	2.9466e+21	2.9445e+21	2.9448e+21	2.9707e+21	2.9829e+21	2.9333e+21	2.9626e+21	2.9622e+21	2.9753e+21
0.91425	2.9066e+21	2.9094e+21	2.9612e+21	2.9583e+21	2.965e+21	2.9358e+21	2.981e+21	2.9306e+21	2.9929e+21	2.9841e+21	2.935e+21	2.9368e+21	2.9678e+21	2.9732e+21
0.9169	2.8753e+21	2.8905e+21	2.9211e+21	2.9229e+21	2.9576e+21	2.9598e+21	2.9952e+21	2.9092e+21	2.9788e+21	2.9748e+21	2.9336e+21	2.9192e+21	2.9663e+21	2.9881e+21
0.91955	2.8677e+21	2.8997e+21	2.9248e+21	2.9121e+21	2.9575e+21	2.9717e+21	2.9935e+21	2.9195e+21	2.9559e+21	2.9595e+21	2.9393e+21	2.9346e+21	2.9707e+21	2.9869e+21
0.9222	2.8605e+21	2.914e+21	2.9449e+21	2.9073e+21	2.9461e+21	2.9591e+21	2.9699e+21	2.9009e+21	2.9533e+21	2.969e+21	2.9387e+21	2.9358e+21	2.9483e+21	2.9816e+21
0.92485	2.8686e+21	2.904e+21	2.9382e+21	2.9073e+21	2.938e+21	2.9451e+21	2.9552e+21	2.885e+21	2.9353e+21	2.9385e+21	2.9468e+21	2.9317e+21	2.9447e+21	2.9681e+21
0.9275	2.8812e+21	2.8985e+21	2.9138e+21	2.8962e+21	2.9238e+21	2.9167e+21	2.9449e+21	2.8877e+21	2.9147e+21	2.9198e+21	2.9495e+21	2.9213e+21	2.9502e+21	2.9603e+21
0.93015	2.8851e+21	2.8915e+21	2.9047e+21	2.9049e+21	2.9066e+21	2.9162e+21	2.9334e+21	2.8956e+21	2.9215e+21	2.9151e+21	2.9347e+21	2.9087e+21	2.9513e+21	2.9306e+21
0.9328	2.8727e+21	2.8843e+21	2.9051e+21	2.9209e+21	2.8956e+21	2.9137e+21	2.9202e+21	2.9054e+21	2.9302e+21	2.9088e+21	2.9321e+21	2.8996e+21	2.9374e+21	2.9374e+21
0.93545	2.8559e+21	2.8732e+21	2.8843e+21	2.9062e+21	2.9004e+21	2.9061e+21	2.9075e+21	2.8891e+21	2.9039e+21	2.8878e+21	2.9264e+21	2.8888e+21	2.9305e+21	2.9641e+21
0.9381	2.8333e+21	2.8797e+21	2.8616e+21	2.9016e+21	2.9023e+21	2.8875e+21	2.9187e+21	2.8852e+21	2.8975e+21	2.8912e+21	2.9275e+21	2.8883e+21	2.9257e+21	2.9595e+21
0.94075	2.816e+21	2.8817e+21	2.8901e+21	2.8908e+21	2.8966e+21	2.8874e+21	2.9192e+21	2.9073e+21	2.8889e+21	2.8931e+21	2.9166e+21	2.8728e+21	2.9073e+21	2.9343e+21
0.9434	2.8132e+21	2.8617e+21	2.8797e+21	2.848e+21	2.9068e+21	2.8749e+21	2.9087e+21	2.8949e+21	2.878e+21	2.8849e+21	2.8854e+21	2.8585e+21	2.8868e+21	2.9131e+21
0.94605	2.7992e+21	2.8417e+21	2.8597e+21	2.832e+21	2.9076e+21	2.8818e+21	2.8831e+21	2.8798e+21	2.892e+21	2.884e+21	2.8827e+21	2.8747e+21	2.8815e+21	2.893e+21
0.9487	2.7997e+21	2.8334e+21	2.8653e+21	2.8245e+21	2.9147e+21	2.8953e+21	2.8731e+21	2.8637e+21	2.8984e+21	2.8873e+21	2.8968e+21	2.8786e+21	2.8847e+21	2.9049e+21
0.95135	2.8019e+21	2.8168e+21	2.8865e+21	2.82e+21	2.8909e+21	2.9011e+21	2.8775e+21	2.8576e+21	2.8838e+21	2.8855e+21	2.9055e+21	2.879e+21	2.8799e+21	2.9103e+21
0.954	2.8077e+21	2.8183e+21	2.8981e+21	2.8267e+21	2.8738e+21	2.8828e+21	2.8833e+21	2.8818e+21	2.8544e+21	2.8741e+21	2.9006e+21	2.8688e+21	2.8699e+21	2.9123e+21
0.95665	2.7865e+21	2.8023e+21	2.8688e+21	2.827e+21	2.8399e+21	2.8637e+21	2.8618e+21	2.8712e+21	2.844e+21	2.8794e+21	2.9011e+21	2.8909e+21	2.867e+21	2.9009e+21
0.9593	2.7665e+21	2.7963e+21	2.8643e+21	2.8384e+21	2.8172e+21	2.8751e+21	2.852e+21	2.8448e+21	2.8579e+21	2.8916e+21	2.9056e+21	2.9116e+21	2.8756e+21	2.8962e+21
0.96195	2.7458e+21	2.8041e+21	2.8825e+21	2.8317e+21	2.822e+21	2.8633e+21	2.8493e+21	2.8396e+21	2.8717e+21	2.8755e+21	2.8813e+21	2.9018e+21	2.8709e+21	2.9066e+21
0.9646	2.7459e+21	2.8029e+21	2.8645e+21	2.832e+21	2.8261e+21	2.8523e+21	2.8474e+21	2.8328e+21	2.8605e+21	2.8846e+21	2.8659e+21	2.8756e+21	2.8699e+21	2.8782e+21
0.96725	2.7549e+21	2.8073e+21	2.8366e+21	2.8625e+21	2.8663e+21	2.8519e+21	2.8363e+21	2.8243e+21	2.8707e+21	2.8916e+21	2.8512e+21	2.8645e+21	2.8741e+21	2.883e+21
0.9699	2.7574e+21	2.8174e+21	2.8433e+21	2.8716e+21	2.874e+21	2.8639e+21	2.8384e+21	2.831e+21	2.8757e+21	2.869e+21	2.8677e+21	2.8631e+21	2.8581e+21	2.8587e+21
0.97255	2.7657e+21	2.8315e+21	2.8544e+21	2.8483e+21	2.8514e+21	2.8598e+21	2.856e+21	2.8287e+21	2.8806e+21	2.86e+21	2.8644e+21	2.8452e+21	2.8399e+21	2.8512e+21
0.9752	2.7632e+21	2.852e+21	2.8683e+21	2.8298e+21	2.8391e+21	2.8447e+21	2.8483e+21	2.8503e+21	2.8681e+21	2.8629e+21	2.8585e+21	2.8446e+21	2.8394e+21	2.8367e+21
0.97785	2.7713e+21	2.8373e+21	2.8609e+21	2.8214e+21	2.8386e+21	2.8652e+21	2.8557e+21	2.8536e+21	2.8457e+21	2.8642e+21	2.8539e+21	2.8428e+21	2.8245e+21	2.8163e+21
0.9805	2.7525e+21	2.8408e+21	2.8345e+21	2.805e+21	2.82e+21	2.8466e+21	2.8483e+21	2.8361e+21	2.8449e+21	2.8543e+21	2.86e+21	2.842e+21	2.8171e+21	2.8094e+21
0.98315	2.7448e+21	2.8362e+21	2.8166e+21	2.8174e+21	2.8043e+21	2.8471e+21	2.8351e+21	2.8501e+21	2.8614e+21	2.8532e+21	2.839e+21	2.8485e+21	2.8368e+21	2.8145e+21
0.9858	2.7501e+21	2.8237e+21	2.8192e+21	2.7991e+21	2.7745e+21	2.8348e+21	2.8267e+21	2.8419e+21	2.8577e+21	2.865e+21	2.8372e+21	2.8414e+21	2.8566e+21	2.8513e+21
0.98845	2.755e+21	2.8163e+21	2.8224e+21	2.7825e+21	2.7663e+21	2.8461e+21	2.8285e+21	2.8365e+21	2.8562e+21	2.8638e+21	2.8749e+21	2.8673e+21	2.8551e+21	2.8811e+21
0.9911	2.7799e+21	2.8138e+21	2.8203e+21	2.7695e+21	2.7844e+21	2.853e+21	2.838e+21	2.842e+21	2.87e+21	2.8595e+21	2.8997e+21	2.8685e+21	2.8755e+21	2.8801e+21
0.99375	2.7817e+21	2.8126e+21	2.8201e+21	2.7565e+21	2.7752e+21	2.8715e+21	2.833e+21	2.8211e+21	2.8715e+21	2.8481e+21	2.8993e+21	2.8612e+21	2.8717e+21	2.8696e+21
0.9964	2.7707e+21	2.8177e+21	2.8118e+21	2.7501e+21	2.7654e+21	2.8626e+21	2.8433e+21	2.8113e+21	2.8567e+21	2.8465e+21	2.8854e+21	2.8404e+21	2.8597e+21	2.8551e+21
0.99905	2.7545e+21	2.8009e+21	2.7787e+21	2.7763e+21	2.7847e+21	2.8461e+21	2.8675e+21	2.7969e+21	2.8495e+21	2.8278e+21	2.869e+21	2.8572e+21	2.8381e+21	2.8509e+21
1.0017	2.7269e+21	2.7946e+21	2.789e+21	2.786e+21	2.7732e+21	2.8401e+21	2.8298e+21	2.794e+21	2.836e+21	2.8188e+21	2.8414e+21	2.8348e+21	2.8382e+21	2.8289e+21
1.00435	2.7207e+21	2.8014e+21	2.7992e+21	2.7838e+21	2.7709e+21	2.8416e+21	2.8268e+21	2.7957e+21	2.8464e+21	2.8061e+21	2.8308e+21	2.8084e+21	2.8419e+21	2.8113e+21
1.007	2.7293e+21	2.7946e+21	2.8014e+21	2.7592e+21	2.7732e+21	2.847e+21	2.8191e+21	2.8004e+21	2.8321e+21	2.8027e+21	2.8446e+21	2.8009e+21	2.8455e+21	2.8226e+21
1.00965	2.741e+21	2.8009e+21	2.7812e+21	2.7506e+21	2.7762e+21	2.8305e+21	2.8255e+21	2.8091e+21	2.8341e+21	2.8179e+21	2.8553e+21	2.8046e+21	2.8471e+21	2.8502e+21
1.0123	2.7555e+21	2.791e+21	2.791e+21	2.7618e+21	2.804e+21	2.8342e+21	2.8171e+21	2.8097e+21	2.8188e+21	2.7915e+21	2.8421e+21	2.8095e+21	2.8113e+21	2.8404e+21
1.01495	2.7635e+21	2.7922e+21	2.7747e+21	2.745e+21	2.8119e+21	2.8568e+21	2.81e+21	2.8254e+21	2.791e+21	2.782e+21	2.8344e+21	2.7959e+21	2.8011e+21	2.8213e+21
1.0176	2.7566e+21	2.7898e+21	2.7522e+21	2.758e+21	2.812e+21	2.8542e+21	2.8035e+21	2.8379e+21	2.8102e+21	2.7958e+21	2.8217e+21	2.8008e+21	2.795e+21	2.8396e+21
1.02025	2.7503e+21	2.7748e+21	2.7788e+21	2.7813e+21	2.8164e+21	2.837e+21	2.7836e+21	2.8374e+21	2.8233e+21	2.8058e+21	2.8101e+21	2.8255e+21	2.7765e+21	2.8318e+21
1.0229	2.7517e+21	2.764e+21	2.8038e+21	2.7941e+21	2.778e+21	2.8363e+21	2.7976e+21	2.8347e+21	2.8132e+21	2.818e+21	2.7878e+21	2.8236e+21	2.7649e+21	2.797e+21
1.02555	2.7376e+21	2.7606e+21	2.8146e+21	2.8e+21	2.7564e+21	2.8337e+21	2.7933e+21	2.8417e+21	2.7953e+21	2.8147e+21	2.776e+21	2.8026e+21	2.759e+21	2.7951e+21
1.0282	2.705e+21	2.7429e+21	2.7976e+21	2.7573e+21	2.7462e+21	2.8164e+21	2.7713e+21	2.8341e+21	2.7715e+21	2.7999e+21	2.7788e+21	2.773e+21	2.7671e+21	2.7949e+21
1.03085	2.695e+21	2.722e+21	2.7941e+21	2.7156e+21	2.7274e+21	2.7913e+21	2.7627e+21	2.8176e+21	2.7538e+21	2.7924e+21	2.7847e+21	2.794e+21	2.7744e+21	2.7872e+21
1.0335	2.7045e+21	2.7074e+21	2.7708e+21	2.7171e+21	2.7258e+21	2.7508e+21	2.7551e+21	2.8072e+21	2.7654e+21	2.7891e+21	2.7908e+21	2.8089e+21	2.7939e+21	2.7887e+21
1.03615	2.7018e+21	2.7139e+21	2.7567e+21	2.7323e+21	2.7369e+21	2.7489e+21	2.7283e+21	2.8006e+21	2.7632e+21	2.7816e+21	2.767e+21	2.7994e+21	2.7931e+21	2.7926e+21
1.0388	2.6929e+21	2.7281e+21	2.7686e+21	2.7163e+21	2.7683e+21	2.7389e+21	2.6927e+21	2.7627e+21	2.7555e+21	2.7977e+21	2.7481e+21	2.7834e+21	2.7862e+21	2.798e+21
1.04145	2.6643e+21	2.7194e+21	2.7764e+21	2.7201e+21	2.7719e+21	2.7491e+21	2.7003e+21	2.7398e+21	2.7431e+21	2.7779e+21	2.7573e+21	2.7579e+21	2.7816e+21	2.7978e+21
1.0441	2.669e+21	2.7096e+21	2.7737e+21	2.7234e+21	2.7602e+21	2.76e+21	2.7264e+21	2.7518e+21	2.7394e+21	2.7761e+21	2.7557e+21	2.7492e+21	2.7725e+21	2.7922e+21
1.04675	2.6847e+21	2.6951e+21	2.7606e+21	2.7234e+21	2.7373e+21	2.7569e+21	2.7348e+21	2.7394e+21	2.7518e+21	2.7597e+21	2.7421e+21	2.7625e+21	2.7712e+21	2.7676e+21
1.0494	2.6722e+21	2.6818e+21	2.7512e+21	2.7367e+21	2.73e+21	2.7441e+21	2.7478e+21	2.737e+21	2.75e+21	2.7731e+21	2.7147e+21	2.769e+21	2.7647e+21	2.7307e+21
1.05205	2.6815e+21	2.6932e+21	2.7384e+21	2.7329e+21	2.735e+21	2.7162e+21	2.7305e+21	2.7261e+21	2.7567e+21	2.7653e+21	2.7026e+21	2.7543e+21	2.7622e+21	2.7604e+21
1.0547	2.6779e+21	2.7001e+21	2.7128e+21	2.7115e+21	2.6971e+21	2.6897e+21	2.7278e+21	2.711e+21	2.757e+21	2.7708e+21	2.7307e+21	2.7774e+21	2.7716e+21	2.777e+21
1.05735	2.6778e+21	2.7068e+21	2.7111e+21	2.7169e+21	2.6752e+21	2.683e+21	2.7623e+21	2.7025e+21	2.7565e+21	2.776e+21	2.7425e+21	2.7706e+21	2.7626e+21	2.7848e+21
1.06	2.6919e+21	2.7178e+21	2.7039e+21	2.713e+21	2.6959e+21	2.7144e+21	2.7725e+21	2.6941e+21	2.7622e+21	2.7788e+21	2.7351e+21	2.7549e+21	2.7662e+21	2.7674e+21
1.06265	2.7177e+21	2.7223e+21	2.7123e+21	2.708e+21	2.7122e+21	2.7332e+21	2.7799e+21	2.7023e+21	2.7532e+21	2.7628e+21	2.7188e+21	2.7448e+21	2.749e+21	2.7556e+21
1.0653	2.7175e+21	2.6942e+21	2.6859e+21	2.7059e+21	2.7121e+21	2.733e+21	2.7715e+21	2.7092e+21	2.7373e+21	2.7375e+21	2.7199e+21	2.7365e+21	2.7533e+21	2.7588e+21
1.06795	2.7182e+21	2.6947e+21	2.6645e+21	2.6887e+21	2.7187e+21	2.7238e+21	2.7485e+21	2.6841e+21	2.7206e+21	2.7219e+21	2.7151e+21	2.735e+21	2.768e+21	2.7548e+21
1.0706	2.7183e+21	2.6902e+21	2.6757e+21	2.7027e+21	2.7379e+21	2.7088e+21	2.7348e+21	2.7019e+21	2.7211e+21	2.7466e+21	2.721e+21	2.7276e+21	2.773e+21	2.743e+21
1.07325	2.7238e+21	2.6994e+21	2.6876e+21	2.7241e+21	2.7272e+21	2.6948e+21	2.7222e+21	2.7278e+21	2.728e+21	2.7458e+21	2.6902e+21	2.7068e+21	2.7441e+21	2.7262e+21
1.0759	2.716e+21	2.7118e+21	2.6809e+21	2.7115e+21	2.6978e+21	2.7101e+21	2.7056e+21	2.7169e+21	2.7188e+21	2.7129e+21	2.6593e+21	2.7172e+21	2.7279e+21	2.7149e+21
1.07855	2.6836e+21	2.6989e+21	2.675e+21	2.7024e+21	2.6989e+21	2.7164e+21	2.6978e+21	2.7239e+21	2.7203e+21	2.6804e+21	2.655e+21	2.7212e+21	2.7148e+21	2.7207e+21
1.0812	2.6685e+21	2.6912e+21	2.6676e+21	2.7064e+21	2.709e+21	2.7207e+21	2.6943e+21	2.6906e+21	2.7042e+21	2.6673e+21	2.6725e+21	2.7057e+21	2.7172e+21	2.7422e+21
1.08385	2.6678e+21	2.6985e+21	2.667e+21	2.6902e+21	2.691e+21	2.7035e+21	2.6997e+21	2.6846e+21	2.7151e+21	2.6715e+21	2.6689e+21	2.7379e+21	2.7161e+21	2.742e+21
1.0865	2.6658e+21	2.7006e+21	2.6632e+21	2.6844e+21	2.7058e+21	2.6959e+21	2.6818e+21	2.7027e+21	2.7147e+21	2.6762e+21	2.6635e+21	2.749e+21	2.6852e+21	2.7315e+21
1.08915	2.6683e+21	2.7078e+21	2.6666e+21	2.6872e+21	2.7202e+21	2.6855e+21	2.681e+21	2.7107e+21	2.6946e+21	2.6756e+21	2.6759e+21	2.7184e+21	2.656e+21	2.7087e+21
1.0918	2.6498e+21	2.6982e+21	2.6629e+21	2.6695e+21	2.7239e+21	2.6902e+21	2.6713e+21	2.6762e+21	2.6753e+21	2.68e+21	2.6542e+21	2.6874e+21	2.6504e+21	2.7012e+21
1.09445	2.6409e+21	2.6743e+21	2.6408e+21	2.6759e+21	2.7092e+21	2.6736e+21	2.6675e+21	2.6713e+21	2.6452e+21	2.6675e+21	2.6519e+21	2.6715e+21	2.6627e+21	2.6943e+21
1.0971	2.6279e+21	2.6512e+21	2.6351e+21	2.6588e+21	2.6876e+21	2.6563e+21	2.665e+21	2.6822e+21	2.65e+21	2.6787e+21	2.6638e+21	2.6576e+21	2.6547e+21	2.659e+21
1.09975	2.5997e+21	2.6518e+21	2.6414e+21	2.6406e+21	2.6925e+21	2.6445e+21	2.6651e+21	2.6854e+21	2.6554e+21	2.6957e+21	2.638e+21	2.6534e+21	2.6465e+21	2.6614e+21
1.1024	2.5781e+21	2.6511e+21	2.6438e+21	2.6258e+21	2.6811e+21	2.652e+21	2.6665e+21	2.6757e+21	2.633e+21	2.6937e+21	2.661e+21	2.6306e+21	2.6589e+21	2.6884e+21
1.10505	2.5636e+21	2.6208e+21	2.6339e+21	2.6177e+21	2.6738e+21	2.6524e+21	2.6602e+21	2.6703e+21	2.6405e+21	2.6837e+21	2.6723e+21	2.6294e+21	2.6587e+21	2.7044e+21
1.1077	2.5522e+21	2.5835e+21	2.6365e+21	2.6195e+21	2.6545e+21	2.6364e+21	2.6443e+21	2.6517e+21	2.6316e+21	2.6641e+21	2.6712e+21	2.6274e+21	2.6429e+21	2.6825e+21
1.11035	2.5542e+21	2.5757e+21	2.638e+21	2.6377e+21	2.6731e+21	2.6157e+21	2.6493e+21	2.6423e+21	2.628e+21	2.6444e+21	2.665e+21	2.6577e+21	2.637e+21	2.6823e+21
1.113	2.5465e+21	2.5884e+21	2.639e+21	2.6253e+21	2.6466e+21	2.6025e+21	2.6373e+21	2.6371e+21	2.6266e+21	2.652e+21	2.6467e+21	2.6593e+21	2.6322e+21	2.6666e+21
1.11565	2.5315e+21	2.5894e+21	2.6341e+21	2.5929e+21	2.6197e+21	2.5671e+21	2.623e+21	2.6337e+21	2.6194e+21	2.659e+21	2.641e+21	2.6456e+21	2.631e+21	2.6586e+21
1.1183	2.5277e+21	2.5921e+21	2.6109e+21	2.5821e+21	2.6165e+21	2.5687e+21	2.6082e+21	2.6449e+21	2.6092e+21	2.6551e+21	2.6313e+21	2.6379e+21	2.6157e+21	2.6302e+21
1.12095	2.5297e+21	2.5903e+21	2.6232e+21	2.564e+21	2.6288e+21	2.5794e+21	2.6129e+21	2.6344e+21	2.5996e+21	2.6237e+21	2.6101e+21	2.6125e+21	2.6045e+21	2.6172e+21
1.1236	2.5199e+21	2.5686e+21	2.621e+21	2.5503e+21	2.6123e+21	2.5775e+21	2.5833e+21	2.6283e+21	2.5703e+21	2.6019e+21	2.5855e+21	2.5974e+21	2.5741e+21	2.6035e+21
1.12625	2.5118e+21	2.5426e+21	2.5913e+21	2.5393e+21	2.5884e+21	2.5506e+21	2.5714e+21	2.6118e+21	2.5422e+21	2.5898e+21	2.5606e+21	2.573e+21	2.5531e+21	2.5893e+21
1.1289	2.5012e+21	2.5392e+21	2.5604e+21	2.5405e+21	2.5658e+21	2.5134e+21	2.5464e+21	2.5494e+21	2.517e+21	2.5504e+21	2.5281e+21	2.5402e+21	2.5383e+21	2.5781e+21
1.13155	2.5044e+21	2.5501e+21	2.5464e+21	2.5312e+21	2.5558e+21	2.4776e+21	2.5228e+21	2.5065e+21	2.4984e+21	2.5217e+21	2.5138e+21	2.521e+21	2.552e+21	2.5622e+21
1.1342	2.5275e+21	2.5533e+21	2.5537e+21	2.5153e+21	2.5715e+21	2.4948e+21	2.5255e+21	2.508e+21	2.5e+21	2.4995e+21	2.4968e+21	2.4852e+21	2.539e+21	2.5485e+21
1.13685	2.5695e+21	2.5589e+21	2.5648e+21	2.5258e+21	2.5556e+21	2.4932e+21	2.543e+21	2.5055e+21	2.4994e+21	2.4797e+21	2.5001e+21	2.4523e+21	2.5076e+21	2.5443e+21
1.1395	2.5735e+21	2.5376e+21	2.5583e+21	2.523e+21	2.5288e+21	2.4937e+21	2.5454e+21	2.5007e+21	2.4832e+21	2.4747e+21	2.4961e+21	2.438e+21	2.5042e+21	2.528e+21
1.14215	2.5738e+21	2.5034e+21	2.5405e+21	2.5183e+21	2.5269e+21	2.5e+21	2.5223e+21	2.4907e+21	2.449e+21	2.4905e+21	2.4609e+21	2.4257e+21	2.5026e+21	2.5009e+21
1.1448	2.5644e+21	2.5019e+21	2.5046e+21	2.4865e+21	2.4825e+21	2.4886e+21	2.4876e+21	2.4707e+21	2.4432e+21	2.4934e+21	2.4351e+21	2.406e+21	2.4927e+21	2.4847e+21
1.14745	2.5458e+21	2.5077e+21	2.4927e+21	2.4739e+21	2.4493e+21	2.453e+21	2.4545e+21	2.4806e+21	2.4477e+21	2.478e+21	2.4215e+21	2.3839e+21	2.478e+21	2.4763e+21
1.1501	2.5607e+21	2.5048e+21	2.4841e+21	2.4647e+21	2.4449e+21	2.4262e+21	2.4123e+21	2.4465e+21	2.4542e+21	2.4319e+21	2.3896e+21	2.3419e+21	2.4373e+21	2.4285e+21
1.15275	2.5601e+21	2.4912e+21	2.499e+21	2.4433e+21	2.4563e+21	2.4223e+21	2.3847e+21	2.4231e+21	2.4296e+21	2.4016e+21	2.3726e+21	2.3361e+21	2.3976e+21	2.3955e+21
1.1554	2.5601e+21	2.51e+21	2.5156e+21	2.4528e+21	2.4614e+21	2.4241e+21	2.3937e+21	2.427e+21	2.4019e+21	2.3811e+21	2.3409e+21	2.3408e+21	2.3737e+21	2.3812e+21
1.15805	2.5397e+21	2.5318e+21	2.5045e+21	2.4606e+21	2.4453e+21	2.4263e+21	2.3956e+21	2.39e+21	2.3762e+21	2.3845e+21	2.3533e+21	2.3557e+21	2.3502e+21	2.3666e+21
1.1607	2.5135e+21	2.5231e+21	2.513e+21	2.4662e+21	2.4184e+21	2.4138e+21	2.3685e+21	2.3769e+21	2.378e+21	2.3869e+21	2.3761e+21	2.3419e+21	2.3553e+21	2.3364e+21
1.16335	2.5266e+21	2.5198e+21	2.5035e+21	2.4552e+21	2.411e+21	2.4327e+21	2.3702e+21	2.3838e+21	2.3835e+21	2.3682e+21	2.3544e+21	2.3247e+21	2.3232e+21	2.2945e+21
1.166	2.5009e+21	2.5018e+21	2.4851e+21	2.4333e+21	2.3968e+21	2.4142e+21	2.3645e+21	2.3655e+21	2.3366e+21	2.3476e+21	2.297e+21	2.2844e+21	2.2925e+21	2.2772e+21
1.16865	2.465e+21	2.4822e+21	2.4742e+21	2.4115e+21	2.3774e+21	2.3824e+21	2.3338e+21	2.3302e+21	2.3017e+21	2.2946e+21	2.2574e+21	2.2533e+21	2.2705e+21	2.2368e+21
1.1713	2.4714e+21	2.4582e+21	2.4472e+21	2.4113e+21	2.3618e+21	2.3508e+21	2.3158e+21	2.2923e+21	2.2581e+21	2.2421e+21	2.2185e+21	2.2121e+21	2.2207e+21	2.1934e+21
1.17395	2.4651e+21	2.4457e+21	2.4007e+21	2.3871e+21	2.3394e+21	2.329e+21	2.2974e+21	2.2542e+21	2.2242e+21	2.1981e+21	2.1912e+21	2.1854e+21	2.1743e+21	2.1966e+21
1.1766	2.4526e+21	2.4221e+21	2.3748e+21	2.3635e+21	2.3344e+21	2.3061e+21	2.2731e+21	2.2302e+21	2.1942e+21	2.1558e+21	2.1603e+21	2.1364e+21	2.1596e+21	2.1741e+21
1.17925	2.4349e+21	2.4227e+21	2.3772e+21	2.3517e+21	2.3044e+21	2.3032e+21	2.2453e+21	2.1988e+21	2.1874e+21	2.1397e+21	2.1344e+21	2.0992e+21	2.1274e+21	2.1206e+21
1.1819	2.4265e+21	2.4318e+21	2.3756e+21	2.3421e+21	2.2814e+21	2.304e+21	2.2238e+21	2.1862e+21	2.1325e+21	2.1147e+21	2.1096e+21	2.0755e+21	2.0991e+21	2.0889e+21
1.18455	2.4264e+21	2.4184e+21	2.3447e+21	2.3183e+21	2.2492e+21	2.272e+21	2.1995e+21	2.17e+21	2.0879e+21	2.1006e+21	2.0867e+21	2.0605e+21	2.0754e+21	2.0955e+21
1.1872	2.446e+21	2.4063e+21	2.3265e+21	2.3297e+21	2.245e+21	2.2491e+21	2.1766e+21	2.1584e+21	2.0832e+21	2.0886e+21	2.0773e+21	2.0575e+21	2.0411e+21	2.0961e+21
1.18985	2.4398e+21	2.3963e+21	2.3403e+21	2.334e+21	2.2325e+21	2.2096e+21	2.1708e+21	2.12e+21	2.0706e+21	2.0531e+21	2.0512e+21	2.0514e+21	2.0223e+21	2.0813e+21
1.1925	2.4126e+21	2.3733e+21	2.3499e+21	2.296e+21	2.2088e+21	2.1815e+21	2.1486e+21	2.1131e+21	2.0513e+21	2.0428e+21	2.0348e+21	2.0277e+21	1.9936e+21	2.0558e+21
1.19515	2.3755e+21	2.358e+21	2.3229e+21	2.2762e+21	2.2008e+21	2.1492e+21	2.1016e+21	2.0964e+21	2.0107e+21	2.0113e+21	2.009e+21	1.9878e+21	1.9385e+21	2.0228e+21
1.1978	2.377e+21	2.352e+21	2.2997e+21	2.2702e+21	2.1871e+21	2.1304e+21	2.0595e+21	2.0617e+21	1.9715e+21	1.9733e+21	1.966e+21	1.9675e+21	1.9175e+21	1.9913e+21
1.20045	2.3722e+21	2.3456e+21	2.2741e+21	2.2414e+21	2.1674e+21	2.114e+21	2.0154e+21	2.0317e+21	1.9513e+21	1.9309e+21	1.9205e+21	1.932e+21	1.8756e+21	1.9704e+21
1.2031	2.3521e+21	2.3391e+21	2.2652e+21	2.2163e+21	2.163e+21	2.1005e+21	1.9967e+21	2.0139e+21	1.9393e+21	1.906e+21	1.8893e+21	1.8966e+21	1.844e+21	1.9557e+21
1.20575	2.3564e+21	2.3212e+21	2.2691e+21	2.215e+21	2.1668e+21	2.1056e+21	1.994e+21	2.0054e+21	1.929e+21	1.8983e+21	1.8685e+21	1.8561e+21	1.8267e+21	1.9183e+21
1.2084	2.331e+21	2.3187e+21	2.2588e+21	2.2179e+21	2.1444e+21	2.1093e+21	1.9869e+21	1.9963e+21	1.9165e+21	1.8954e+21	1.8442e+21	1.8592e+21	1.8164e+21	1.8831e+21
1.21105	2.3274e+21	2.3245e+21	2.2615e+21	2.2269e+21	2.1386e+21	2.0937e+21	1.9735e+21	1.9742e+21	1.8979e+21	1.869e+21	1.8224e+21	1.8469e+21	1.8092e+21	1.8531e+21
1.2137	2.3154e+21	2.3003e+21	2.2536e+21	2.197e+21	2.1465e+21	2.0587e+21	1.9597e+21	1.9366e+21	1.8798e+21	1.8324e+21	1.7947e+21	1.8143e+21	1.8021e+21	1.834e+21
1.21635	2.2846e+21	2.2743e+21	2.22e+21	2.1741e+21	2.1122e+21	2.0356e+21	1.9618e+21	1.9122e+21	1.8496e+21	1.8003e+21	1.7715e+21	1.79e+21	1.7879e+21	1.8104e+21
1.219	2.2674e+21	2.2385e+21	2.191e+21	2.1582e+21	2.0846e+21	2.0323e+21	1.9616e+21	1.8935e+21	1.8235e+21	1.7732e+21	1.7639e+21	1.7418e+21	1.7697e+21	1.7758e+21
1.22165	2.2492e+21	2.2168e+21	2.1897e+21	2.1193e+21	2.0564e+21	1.9983e+21	1.9371e+21	1.8558e+21	1.7835e+21	1.7546e+21	1.7575e+21	1.705e+21	1.7574e+21	1.7791e+21
1.2243	2.2384e+21	2.1993e+21	2.1903e+21	2.1018e+21	2.0471e+21	1.9662e+21	1.9014e+21	1.8304e+21	1.767e+21	1.7417e+21	1.7359e+21	1.6768e+21	1.7282e+21	1.7705e+21
1.22695	2.2469e+21	2.2012e+21	2.1711e+21	2.0891e+21	2.0274e+21	1.9584e+21	1.8874e+21	1.8176e+21	1.752e+21	1.7303e+21	1.728e+21	1.6656e+21	1.7028e+21	1.7464e+21
1.2296	2.233e+21	2.2016e+21	2.1515e+21	2.0855e+21	2.0264e+21	1.9589e+21	1.8824e+21	1.806e+21	1.7374e+21	1.699e+21	1.7277e+21	1.6766e+21	1.6779e+21	1.7338e+21
1.23225	2.2239e+21	2.1827e+21	2.1393e+21	2.0797e+21	2.0182e+21	1.9658e+21	1.8592e+21	1.8121e+21	1.7193e+21	1.672e+21	1.711e+21	1.681e+21	1.6566e+21	1.7342e+21
1.2349	2.2252e+21	2.1733e+21	2.1188e+21	2.0693e+21	2.0098e+21	1.9673e+21	1.8408e+21	1.7901e+21	1.7311e+21	1.6638e+21	1.6806e+21	1.669e+21	1.6559e+21	1.6945e+21
1.23755	2.2245e+21	2.1712e+21	2.1129e+21	2.0541e+21	2.0135e+21	1.9598e+21	1.8354e+21	1.782e+21	1.735e+21	1.6648e+21	1.6398e+21	1.6655e+21	1.6318e+21	1.6715e+21
1.2402	2.2214e+21	2.1534e+21	2.1017e+21	2.0387e+21	2.011e+21	1.9364e+21	1.8331e+21	1.7816e+21	1.7262e+21	1.6453e+21	1.6303e+21	1.6439e+21	1.5994e+21	1.6563e+21
1.24285	2.2273e+21	2.1505e+21	2.0872e+21	2.0457e+21	1.994e+21	1.9165e+21	1.8201e+21	1.7539e+21	1.7028e+21	1.6154e+21	1.625e+21	1.6291e+21	1.5942e+21	1.6426e+21
1.2455	2.2159e+21	2.1485e+21	2.0792e+21	2.0313e+21	1.9452e+21	1.8927e+21	1.8036e+21	1.7404e+21	1.6924e+21	1.6037e+21	1.5959e+21	1.6041e+21	1.5892e+21	1.6361e+21
1.24815	2.213e+21	2.1422e+21	2.0768e+21	2.0191e+21	1.9094e+21	1.8725e+21	1.7968e+21	1.7394e+21	1.674e+21	1.606e+21	1.5705e+21	1.5846e+21	1.5882e+21	1.6143e+21
1.2508	2.2156e+21	2.1572e+21	2.0935e+21	2.0002e+21	1.9108e+21	1.8697e+21	1.7829e+21	1.7078e+21	1.6535e+21	1.576e+21	1.5486e+21	1.5515e+21	1.5771e+21	1.6012e+21
1.25345	2.2026e+21	2.1595e+21	2.0709e+21	1.9658e+21	1.9014e+21	1.8502e+21	1.7635e+21	1.6804e+21	1.6461e+21	1.5755e+21	1.5309e+21	1.5505e+21	1.5659e+21	1.5782e+21
1.2561	2.1916e+21	2.1381e+21	2.0635e+21	1.9705e+21	1.9162e+21	1.8368e+21	1.7582e+21	1.6758e+21	1.6289e+21	1.5452e+21	1.5048e+21	1.5553e+21	1.547e+21	1.5642e+21
1.25875	2.2015e+21	2.1255e+21	2.0505e+21	1.9878e+21	1.9169e+21	1.8257e+21	1.7649e+21	1.6659e+21	1.6193e+21	1.5161e+21	1.5062e+21	1.5373e+21	1.5252e+21	1.5649e+21
1.2614	2.2167e+21	2.1361e+21	2.057e+21	1.9969e+21	1.9176e+21	1.8035e+21	1.7625e+21	1.6781e+21	1.6183e+21	1.5163e+21	1.5181e+21	1.5343e+21	1.5243e+21	1.5615e+21
1.26405	2.2206e+21	2.1645e+21	2.0706e+21	2.0007e+21	1.9142e+21	1.809e+21	1.7687e+21	1.6842e+21	1.6127e+21	1.5195e+21	1.4976e+21	1.5299e+21	1.5289e+21	1.5484e+21
1.2667	2.2065e+21	2.1672e+21	2.0657e+21	2.0064e+21	1.9124e+21	1.8249e+21	1.776e+21	1.6945e+21	1.6151e+21	1.4996e+21	1.4841e+21	1.5214e+21	1.5427e+21	1.5441e+21
1.26935	2.2082e+21	2.1293e+21	2.06e+21	1.9886e+21	1.9011e+21	1.853e+21	1.7501e+21	1.6797e+21	1.6115e+21	1.4981e+21	1.5005e+21	1.5159e+21	1.5338e+21	1.5514e+21
1.272	2.1922e+21	2.0997e+21	2.0579e+21	1.9735e+21	1.8833e+21	1.831e+21	1.7289e+21	1.6786e+21	1.6076e+21	1.4881e+21	1.5081e+21	1.5117e+21	1.5297e+21	1.538e+21
1.27465	2.1547e+21	2.0865e+21	2.0455e+21	1.9436e+21	1.8602e+21	1.8093e+21	1.734e+21	1.6766e+21	1.5812e+21	1.4723e+21	1.5141e+21	1.5002e+21	1.5084e+21	1.5174e+21
1.2773	2.1305e+21	2.0849e+21	2.0255e+21	1.9357e+21	1.8539e+21	1.7806e+21	1.7054e+21	1.6757e+21	1.5451e+21	1.47e+21	1.4932e+21	1.4784e+21	1.4891e+21	1.5102e+21
1.27995	2.1181e+21	2.0749e+21	1.9964e+21	1.9298e+21	1.8395e+21	1.7917e+21	1.6961e+21	1.666e+21	1.516e+21	1.4616e+21	1.464e+21	1.4543e+21	1.4706e+21	1.5015e+21
1.2826	2.11e+21	2.0681e+21	1.9864e+21	1.9228e+21	1.8276e+21	1.7925e+21	1.7011e+21	1.6502e+21	1.5281e+21	1.4597e+21	1.4489e+21	1.434e+21	1.4446e+21	1.4907e+21
1.28525	2.1169e+21	2.0518e+21	1.987e+21	1.9223e+21	1.7998e+21	1.7746e+21	1.6991e+21	1.6456e+21	1.5365e+21	1.4701e+21	1.4326e+21	1.4313e+21	1.4269e+21	1.4833e+21
1.2879	2.0991e+21	2.0519e+21	1.9857e+21	1.9272e+21	1.7943e+21	1.7793e+21	1.6895e+21	1.6213e+21	1.5158e+21	1.4644e+21	1.4161e+21	1.4199e+21	1.4238e+21	1.4731e+21
1.29055	2.1071e+21	2.0568e+21	1.98e+21	1.9171e+21	1.8013e+21	1.767e+21	1.6805e+21	1.6063e+21	1.5117e+21	1.4476e+21	1.4239e+21	1.4086e+21	1.4143e+21	1.4501e+21
1.2932	2.0855e+21	2.0245e+21	1.9747e+21	1.9165e+21	1.8173e+21	1.7733e+21	1.6663e+21	1.6004e+21	1.4946e+21	1.4356e+21	1.429e+21	1.4037e+21	1.4091e+21	1.4462e+21
1.29585	2.0819e+21	2.0137e+21	1.9833e+21	1.8906e+21	1.8041e+21	1.7755e+21	1.6617e+21	1.5931e+21	1.484e+21	1.4295e+21	1.438e+21	1.3952e+21	1.4016e+21	1.4544e+21
1.2985	2.077e+21	2.0307e+21	1.9897e+21	1.8947e+21	1.8135e+21	1.7607e+21	1.6725e+21	1.5721e+21	1.4777e+21	1.4343e+21	1.4447e+21	1.3933e+21	1.4056e+21	1.4397e+21
1.30115	2.0728e+21	2.0398e+21	1.9926e+21	1.9065e+21	1.8511e+21	1.7501e+21	1.6617e+21	1.5813e+21	1.4892e+21	1.4516e+21	1.4358e+21	1.3903e+21	1.3974e+21	1.4453e+21
1.3038	2.074e+21	2.0241e+21	1.986e+21	1.9094e+21	1.8555e+21	1.7415e+21	1.6582e+21	1.5903e+21	1.5198e+21	1.4487e+21	1.4267e+21	1.3838e+21	1.3757e+21	1.4552e+21
1.30645	2.0667e+21	1.9889e+21	1.9812e+21	1.8904e+21	1.8353e+21	1.7262e+21	1.653e+21	1.5735e+21	1.5049e+21	1.4259e+21	1.4153e+21	1.3517e+21	1.3752e+21	1.4658e+21
1.3091	2.0724e+21	1.9978e+21	1.9613e+21	1.8622e+21	1.8388e+21	1.7295e+21	1.6411e+21	1.5722e+21	1.4985e+21	1.411e+21	1.3961e+21	1.3378e+21	1.3643e+21	1.4635e+21
1.31175	2.0666e+21	2.0096e+21	1.963e+21	1.8671e+21	1.8304e+21	1.7235e+21	1.6422e+21	1.5451e+21	1.4779e+21	1.4104e+21	1.3806e+21	1.3369e+21	1.3738e+21	1.4449e+21
1.3144	2.0548e+21	1.989e+21	1.9442e+21	1.8577e+21	1.8024e+21	1.6881e+21	1.637e+21	1.5348e+21	1.4586e+21	1.41e+21	1.3579e+21	1.3481e+21	1.3733e+21	1.4389e+21
1.31705	2.0374e+21	1.9663e+21	1.9224e+21	1.8361e+21	1.7985e+21	1.6685e+21	1.6206e+21	1.5221e+21	1.4562e+21	1.4013e+21	1.3549e+21	1.3466e+21	1.3574e+21	1.4289e+21
1.3197	2.039e+21	1.9776e+21	1.9101e+21	1.83e+21	1.788e+21	1.6578e+21	1.6205e+21	1.5182e+21	1.4619e+21	1.3892e+21	1.3449e+21	1.3447e+21	1.3288e+21	1.4046e+21
1.32235	2.0379e+21	1.9717e+21	1.8854e+21	1.8119e+21	1.7873e+21	1.6313e+21	1.6275e+21	1.515e+21	1.4548e+21	1.384e+21	1.3332e+21	1.3387e+21	1.3155e+21	1.3799e+21
1.325	2.0177e+21	1.9475e+21	1.8516e+21	1.7765e+21	1.7619e+21	1.6116e+21	1.6234e+21	1.4806e+21	1.4255e+21	1.3602e+21	1.3284e+21	1.3254e+21	1.3079e+21	1.3658e+21
1.32765	2.0023e+21	1.9417e+21	1.8543e+21	1.7843e+21	1.76e+21	1.6164e+21	1.6094e+21	1.4882e+21	1.4054e+21	1.343e+21	1.3166e+21	1.3133e+21	1.3158e+21	1.3604e+21
1.3303	2.0073e+21	1.9344e+21	1.8721e+21	1.7994e+21	1.7612e+21	1.6296e+21	1.6106e+21	1.4847e+21	1.4017e+21	1.3452e+21	1.304e+21	1.3141e+21	1.3453e+21	1.3908e+21
1.33295	2.0004e+21	1.9044e+21	1.8914e+21	1.7811e+21	1.7469e+21	1.6301e+21	1.6036e+21	1.4512e+21	1.3979e+21	1.343e+21	1.2986e+21	1.2911e+21	1.3408e+21	1.4048e+21
1.3356	2.0016e+21	1.8977e+21	1.8783e+21	1.7666e+21	1.7409e+21	1.6286e+21	1.5913e+21	1.4333e+21	1.3925e+21	1.3383e+21	1.2994e+21	1.2743e+21	1.3452e+21	1.3749e+21
1.33825	1.9869e+21	1.8952e+21	1.8554e+21	1.7521e+21	1.717e+21	1.6326e+21	1.576e+21	1.4512e+21	1.39e+21	1.3375e+21	1.3077e+21	1.277e+21	1.331e+21	1.3611e+21
1.3409	1.9686e+21	1.8753e+21	1.8359e+21	1.7459e+21	1.6987e+21	1.6205e+21	1.5528e+21	1.4674e+21	1.4134e+21	1.3291e+21	1.3112e+21	1.281e+21	1.3186e+21	1.3631e+21
1.34355	1.9595e+21	1.8729e+21	1.8165e+21	1.7405e+21	1.6857e+21	1.6147e+21	1.546e+21	1.4776e+21	1.4007e+21	1.3214e+21	1.3012e+21	1.2701e+21	1.3199e+21	1.3494e+21
1.3462	1.9516e+21	1.8646e+21	1.8144e+21	1.7412e+21	1.66e+21	1.618e+21	1.5298e+21	1.4756e+21	1.3803e+21	1.3115e+21	1.281e+21	1.2563e+21	1.3119e+21	1.3222e+21
1.34885	1.9519e+21	1.85e+21	1.8111e+21	1.7387e+21	1.6569e+21	1.5979e+21	1.52e+21	1.4688e+21	1.3599e+21	1.3122e+21	1.2519e+21	1.2674e+21	1.3113e+21	1.3171e+21
1.3515	1.9608e+21	1.838e+21	1.7929e+21	1.7221e+21	1.6532e+21	1.5822e+21	1.5295e+21	1.45e+21	1.3575e+21	1.3262e+21	1.2283e+21	1.2666e+21	1.2875e+21	1.3077e+21
1.35415	1.9431e+21	1.8408e+21	1.7828e+21	1.6986e+21	1.6482e+21	1.5744e+21	1.5237e+21	1.4233e+21	1.3574e+21	1.3301e+21	1.2298e+21	1.2608e+21	1.2628e+21	1.2899e+21
1.3568	1.9112e+21	1.8075e+21	1.7675e+21	1.6767e+21	1.6253e+21	1.5579e+21	1.503e+21	1.4101e+21	1.3585e+21	1.3062e+21	1.2432e+21	1.2503e+21	1.243e+21	1.2826e+21
1.35945	1.8842e+21	1.7979e+21	1.7406e+21	1.6579e+21	1.6097e+21	1.5401e+21	1.482e+21	1.4016e+21	1.347e+21	1.2757e+21	1.2399e+21	1.2347e+21	1.2141e+21	1.2667e+21
1.3621	1.8604e+21	1.7774e+21	1.6913e+21	1.6338e+21	1.5881e+21	1.5173e+21	1.4557e+21	1.3832e+21	1.343e+21	1.2554e+21	1.2205e+21	1.2066e+21	1.2198e+21	1.2438e+21
1.36475	1.85e+21	1.7605e+21	1.681e+21	1.6132e+21	1.5701e+21	1.5086e+21	1.45e+21	1.3641e+21	1.3141e+21	1.2441e+21	1.1883e+21	1.1795e+21	1.2017e+21	1.2073e+21
1.3674	1.8416e+21	1.7564e+21	1.6744e+21	1.5798e+21	1.5525e+21	1.493e+21	1.4413e+21	1.3536e+21	1.2648e+21	1.2178e+21	1.1667e+21	1.1506e+21	1.1795e+21	1.1834e+21
1.37005	1.792e+21	1.735e+21	1.6373e+21	1.5506e+21	1.5101e+21	1.4751e+21	1.4027e+21	1.3362e+21	1.2358e+21	1.1761e+21	1.1537e+21	1.141e+21	1.1548e+21	1.1786e+21
1.3727	1.7508e+21	1.7079e+21	1.6152e+21	1.5167e+21	1.4763e+21	1.4499e+21	1.363e+21	1.3227e+21	1.2187e+21	1.1579e+21	1.1369e+21	1.136e+21	1.1325e+21	1.1632e+21
1.37535	1.7082e+21	1.6637e+21	1.5943e+21	1.4905e+21	1.4586e+21	1.4181e+21	1.3407e+21	1.2896e+21	1.2004e+21	1.1434e+21	1.1254e+21	1.1061e+21	1.1113e+21	1.1414e+21
1.378	1.6635e+21	1.6442e+21	1.5724e+21	1.462e+21	1.4186e+21	1.3666e+21	1.327e+21	1.2505e+21	1.1822e+21	1.1309e+21	1.1064e+21	1.0956e+21	1.0776e+21	1.129e+21
1.38065	1.6283e+21	1.6085e+21	1.5223e+21	1.4208e+21	1.383e+21	1.3297e+21	1.2886e+21	1.2169e+21	1.1493e+21	1.0995e+21	1.0951e+21	1.0577e+21	1.0523e+21	1.1124e+21
1.3833	1.584e+21	1.5452e+21	1.4549e+21	1.3639e+21	1.3588e+21	1.3095e+21	1.2485e+21	1.1929e+21	1.1197e+21	1.0779e+21	1.0603e+21	1.0281e+21	1.0121e+21	1.0655e+21
1.38595	1.5363e+21	1.4592e+21	1.392e+21	1.3048e+21	1.3122e+21	1.2692e+21	1.2055e+21	1.1664e+21	1.0867e+21	1.0326e+21	1.0255e+21	9.9156e+20	9.8206e+20	1.0227e+21
1.3886	1.483e+21	1.3942e+21	1.3245e+21	1.2554e+21	1.2522e+21	1.1835e+21	1.1512e+21	1.1112e+21	1.0516e+21	9.8204e+20	9.7412e+20	9.4977e+20	9.2823e+20	9.4701e+20
1.39125	1.399e+21	1.3168e+21	1.2627e+21	1.1801e+21	1.1743e+21	1.1184e+21	1.0882e+21	1.0541e+21	1.0127e+21	9.3352e+20	9.0819e+20	9.1543e+20	8.7352e+20	8.8511e+20
1.3939	1.3339e+21	1.2413e+21	1.1796e+21	1.1012e+21	1.1047e+21	1.0421e+21	1.0212e+21	9.936e+20	9.6372e+20	8.7529e+20	8.4846e+20	8.4554e+20	8.2686e+20	8.1603e+20
1.39655	1.2552e+21	1.1665e+21	1.1011e+21	1.0394e+21	1.0258e+21	9.5721e+20	9.5873e+20	9.2796e+20	8.8218e+20	8.1348e+20	7.8428e+20	7.7572e+20	7.5536e+20	7.4843e+20
1.3992	1.1654e+21	1.1021e+21	1.0643e+21	9.9329e+20	9.6413e+20	8.962e+20	8.9641e+20	8.5665e+20	8.0662e+20	7.4036e+20	7.3315e+20	7.1909e+20	6.9392e+20	6.9828e+20
1.40185	1.1264e+21	1.0605e+21	1.0414e+21	9.427e+20	9.1122e+20	8.8007e+20	8.5051e+20	8.158e+20	7.4986e+20	6.8806e+20	6.7235e+20	6.7364e+20	6.3408e+20	6.7323e+20
1.4045	1.1045e+21	1.0182e+21	1.0153e+21	9.193e+20	9.0176e+20	8.6002e+20	8.3916e+20	7.7528e+20	7.0088e+20	6.5239e+20	6.3651e+20	6.437e+20	5.9775e+20	6.6503e+20
1.40715	1.0802e+21	1.0128e+21	1.0037e+21	9.1571e+20	9.0885e+20	8.5435e+20	8.1461e+20	7.5475e+20	6.8008e+20	6.3929e+20	6.3612e+20	6.3682e+20	5.9459e+20	6.5957e+20
1.4098	1.065e+21	1.0092e+21	9.947e+20	9.1973e+20	9.1725e+20	8.6907e+20	8.1113e+20	7.6106e+20	6.847e+20	6.6473e+20	6.2695e+20	6.4083e+20	6.1266e+20	6.5928e+20
1.41245	1.0437e+21	9.8314e+20	9.8735e+20	9.085e+20	9.1635e+20	8.7263e+20	8.3376e+20	7.7358e+20	7.011e+20	6.8977e+20	6.4096e+20	6.5405e+20	6.3553e+20	6.8955e+20
1.4151	9.9056e+20	9.2885e+20	9.3349e+20	8.5922e+20	8.9544e+20	8.4612e+20	8.2465e+20	7.6949e+20	7.1033e+20	7.125e+20	6.7433e+20	6.9363e+20	6.6745e+20	6.9861e+20
1.41775	9.3459e+20	8.462e+20	8.5461e+20	7.8121e+20	8.326e+20	7.9585e+20	7.93e+20	7.5582e+20	6.9427e+20	7.148e+20	6.8353e+20	6.9808e+20	6.5644e+20	6.6804e+20
1.4204	8.269e+20	7.4086e+20	7.4556e+20	6.6848e+20	7.3652e+20	7.1659e+20	7.4388e+20	7.1616e+20	6.5841e+20	6.747e+20	6.3627e+20	6.4433e+20	6.0983e+20	5.9684e+20
1.42305	7.2166e+20	6.4243e+20	6.3947e+20	5.7512e+20	6.2642e+20	6.4852e+20	6.5893e+20	6.4299e+20	6.0295e+20	5.9353e+20	5.5369e+20	5.4114e+20	5.2281e+20	4.7047e+20
1.4257	6.0404e+20	5.3651e+20	5.1766e+20	4.8222e+20	5.0606e+20	5.1511e+20	5.4252e+20	5.4617e+20	5.1793e+20	4.9866e+20	4.6561e+20	4.4456e+20	4.345e+20	3.9695e+20
1.42835	5.1062e+20	4.464e+20	4.1789e+20	3.9277e+20	4.0157e+20	4.051e+20	4.2517e+20	4.577e+20	4.158e+20	3.9682e+20	3.969e+20	3.6488e+20	3.4322e+20	3.2185e+20
1.431	4.2353e+20	3.5119e+20	3.5903e+20	3.0729e+20	3.2581e+20	3.3933e+20	3.3002e+20	3.5838e+20	3.3173e+20	3.1671e+20	3.0695e+20	2.9007e+20	2.6383e+20	2.4885e+20
1.43365	3.3192e+20	2.7252e+20	2.735e+20	2.4994e+20	2.4493e+20	2.5637e+20	2.4569e+20	2.6857e+20	2.3159e+20	2.3502e+20	2.3204e+20	2.186e+20	1.773e+20	1.6514e+20
1.4363	2.6585e+20	2.0462e+20	1.9338e+20	1.8676e+20	1.831e+20	1.8374e+20	1.8492e+20	2.135e+20	1.4715e+20	1.5438e+20	1.5787e+20	1.4827e+20	9.8394e+19	1.0158e+20
1.43895	2.0361e+20	1.3558e+20	1.2004e+20	1.2282e+20	1.5144e+20	1.336e+20	1.247e+20	1.4105e+20	9.7712e+19	8.5254e+19	9.5319e+19	9.4804e+19	5.9631e+19	7.2688e+19
1.4416	1.3943e+20	9.3383e+19	8.6317e+19	6.2328e+19	9.6218e+19	8.281e+19	6.5736e+19	6.903e+19	5.5413e+19	3.6458e+19	5.7251e+19	6.0338e+19	1.5848e+19	1.9045e+19
1.44425	8.5633e+19	5.1953e+19	6.1487e+19	2.6078e+19	5.2676e+19	4.2112e+19	2.0971e+19	3.5539e+18	-9.9271e+18	-1.6981e+19	1.1388e+19	-3.9478e+18	-3.3359e+19	-3.8092e+19
1.4469	4.3654e+19	3.4803e+18	2.2975e+18	-1.7845e+19	-1.5755e+19	-1.841e+19	-2.4323e+19	-3.5569e+19	-5.7017e+19	-6.5919e+19	-3.7457e+19	-6.2881e+19	-6.8215e+19	-7.5755e+19
1.44955	1.0991e+18	-3.8452e+19	-5.4408e+19	-5.9511e+19	-5.1464e+19	-7.9777e+19	-6.4944e+19	-8.0609e+19	-9.763e+19	-1.0415e+20	-8.1831e+19	-1.1455e+20	-9.5332e+19	-1.2853e+20
1.4522	-2.7604e+19	-6.2464e+19	-8.7217e+19	-9.8232e+19	-9.2746e+19	-1.0547e+20	-9.7944e+19	-1.1555e+20	-1.313e+20	-1.3959e+20	-1.1308e+20	-1.3359e+20	-1.4438e+20	-1.5774e+20
1.45485	-6.4693e+19	-9.6524e+19	-9.8357e+19	-1.354e+20	-1.2866e+20	-1.2501e+20	-1.2766e+20	-1.4597e+20	-1.4843e+20	-1.8221e+20	-1.4278e+20	-1.5339e+20	-1.8637e+20	-1.8291e+20
1.4575	-9.9235e+19	-1.3825e+20	-1.2333e+20	-1.7963e+20	-1.6017e+20	-1.4953e+20	-1.5752e+20	-1.8076e+20	-1.726e+20	-2.0431e+20	-1.8147e+20	-1.763e+20	-2.2329e+20	-2.3163e+20
1.46015	-1.2304e+20	-1.6319e+20	-1.5929e+20	-2.1007e+20	-1.8544e+20	-1.7871e+20	-1.8017e+20	-1.9726e+20	-1.965e+20	-2.4248e+20	-2.1145e+20	-2.1336e+20	-2.4643e+20	-2.6357e+20
1.4628	-1.4971e+20	-1.9706e+20	-2.007e+20	-2.2919e+20	-1.9327e+20	-1.991e+20	-2.0939e+20	-2.1185e+20	-2.3813e+20	-2.5631e+20	-2.4481e+20	-2.3838e+20	-2.6835e+20	-2.7638e+20
1.46545	-1.8161e+20	-2.1116e+20	-2.3033e+20	-2.3736e+20	-2.0808e+20	-2.1898e+20	-2.3745e+20	-2.2448e+20	-2.6826e+20	-2.7216e+20	-2.7019e+20	-2.5347e+20	-2.9048e+20	-2.951e+20
1.4681	-2.2074e+20	-2.2153e+20	-2.4441e+20	-2.4834e+20	-2.3203e+20	-2.4077e+20	-2.756e+20	-2.4598e+20	-2.9092e+20	-2.9582e+20	-2.9062e+20	-2.8537e+20	-3.0418e+20	-3.0505e+20
1.47075	-2.5287e+20	-2.4033e+20	-2.5559e+20	-2.7527e+20	-2.6347e+20	-2.6055e+20	-2.8563e+20	-2.7374e+20	-3.0982e+20	-3.3492e+20	-3.0959e+20	-3.1371e+20	-3.3843e+20	-3.248e+20
1.4734	-2.8485e+20	-2.7064e+20	-2.7481e+20	-2.9335e+20	-2.8656e+20	-2.7779e+20	-2.9997e+20	-3.0865e+20	-3.2721e+20	-3.5346e+20	-3.2939e+20	-3.4437e+20	-3.6797e+20	-3.4351e+20
1.47605	-3.0383e+20	-2.9564e+20	-3.0043e+20	-3.1779e+20	-3.1831e+20	-3.0419e+20	-3.1591e+20	-3.2556e+20	-3.5653e+20	-3.7614e+20	-3.5162e+20	-3.6927e+20	-3.7398e+20	-3.7163e+20
1.4787	-3.3038e+20	-3.1197e+20	-3.2106e+20	-3.3922e+20	-3.404e+20	-3.3759e+20	-3.2802e+20	-3.5618e+20	-3.8654e+20	-4.0399e+20	-3.6297e+20	-3.7855e+20	-3.9753e+20	-3.8464e+20
1.48135	-3.5207e+20	-3.3147e+20	-3.4882e+20	-3.6655e+20	-3.5565e+20	-3.6847e+20	-3.6165e+20	-3.8334e+20	-3.992e+20	-4.1522e+20	-3.9238e+20	-3.7624e+20	-4.1356e+20	-3.937e+20
1.484	-3.6685e+20	-3.535e+20	-3.8118e+20	-3.8483e+20	-3.7765e+20	-3.9017e+20	-3.7725e+20	-4.0518e+20	-4.0995e+20	-4.0604e+20	-4.1059e+20	-3.938e+20	-4.218e+20	-4.041e+20
1.48665	-3.8167e+20	-3.8572e+20	-3.8999e+20	-3.9603e+20	-3.9205e+20	-4.0272e+20	-3.8366e+20	-4.1225e+20	-4.2257e+20	-4.1056e+20	-4.2296e+20	-4.038e+20	-4.2734e+20	-4.2046e+20
1.4893	-3.8997e+20	-3.8425e+20	-4.004e+20	-4.1994e+20	-4.0839e+20	-4.1005e+20	-3.9657e+20	-4.1143e+20	-4.3479e+20	-4.2556e+20	-4.2624e+20	-4.1626e+20	-4.4408e+20	-4.338e+20
1.49195	-3.9144e+20	-3.8407e+20	-4.001e+20	-4.2364e+20	-4.2388e+20	-4.0478e+20	-4.0666e+20	-4.2493e+20	-4.5026e+20	-4.314e+20	-4.3559e+20	-4.3936e+20	-4.611e+20	-4.5424e+20
1.4946	-4.2374e+20	-3.9479e+20	-4.2648e+20	-4.3473e+20	-4.4621e+20	-4.0692e+20	-4.2692e+20	-4.4327e+20	-4.7017e+20	-4.4883e+20	-4.5534e+20	-4.5505e+20	-4.7211e+20	-4.7967e+20
1.49725	-4.6129e+20	-4.1609e+20	-4.4174e+20	-4.6677e+20	-4.6398e+20	-4.2175e+20	-4.3583e+20	-4.5711e+20	-4.8928e+20	-4.8059e+20	-4.7173e+20	-4.7599e+20	-4.7869e+20	-4.9537e+20
1.4999	-4.6487e+20	-4.302e+20	-4.7227e+20	-4.8942e+20	-4.6627e+20	-4.4602e+20	-4.3776e+20	-4.7101e+20	-4.8628e+20	-4.824e+20	-4.8747e+20	-4.8596e+20	-5.0655e+20	-5.085e+20
1.50255	-4.827e+20	-4.3894e+20	-4.778e+20	-5.071e+20	-4.8139e+20	-4.6906e+20	-4.425e+20	-4.7489e+20	-4.769e+20	-4.9494e+20	-5.1061e+20	-5.0262e+20	-5.3091e+20	-5.1942e+20
1.5052	-4.9849e+20	-4.5927e+20	-4.8448e+20	-5.0565e+20	-4.9532e+20	-4.9199e+20	-4.567e+20	-4.7404e+20	-4.8603e+20	-5.1028e+20	-5.2109e+20	-5.0736e+20	-5.3518e+20	-5.1423e+20
1.50785	-5.0079e+20	-4.7171e+20	-4.9956e+20	-5.005e+20	-5.0575e+20	-4.927e+20	-4.6106e+20	-4.8421e+20	-5.0992e+20	-5.1813e+20	-5.3677e+20	-5.2008e+20	-5.4973e+20	-5.2979e+20
1.5105	-5.1764e+20	-4.9188e+20	-5.1269e+20	-5.099e+20	-5.1426e+20	-5.0603e+20	-4.7158e+20	-5.0628e+20	-5.2161e+20	-5.4586e+20	-5.4926e+20	-5.3895e+20	-5.5527e+20	-5.4705e+20
1.51315	-5.2512e+20	-5.0721e+20	-5.2622e+20	-5.1856e+20	-5.3467e+20	-5.0482e+20	-5.0424e+20	-5.2546e+20	-5.3395e+20	-5.6381e+20	-5.4287e+20	-5.5939e+20	-5.5878e+20	-5.4661e+20
1.5158	-5.2721e+20	-5.047e+20	-5.4012e+20	-5.3063e+20	-5.44e+20	-5.0592e+20	-5.1432e+20	-5.3405e+20	-5.4468e+20	-5.6177e+20	-5.5182e+20	-5.5518e+20	-5.6116e+20	-5.4987e+20
1.51845	-5.257e+20	-5.1457e+20	-5.3088e+20	-5.2975e+20	-5.4055e+20	-5.045e+20	-5.1792e+20	-5.382e+20	-5.449e+20	-5.5985e+20	-5.6914e+20	-5.5397e+20	-5.6468e+20	-5.4648e+20
1.5211	-5.3029e+20	-5.2249e+20	-5.2861e+20	-5.2063e+20	-5.3521e+20	-5.1609e+20	-5.2137e+20	-5.4943e+20	-5.4828e+20	-5.64e+20	-5.6782e+20	-5.5986e+20	-5.6322e+20	-5.5304e+20
1.52375	-5.4576e+20	-5.2634e+20	-5.3049e+20	-5.142e+20	-5.443e+20	-5.2432e+20	-5.1807e+20	-5.4091e+20	-5.5178e+20	-5.681e+20	-5.7015e+20	-5.7506e+20	-5.6059e+20	-5.6223e+20
1.5264	-5.4861e+20	-5.27e+20	-5.3826e+20	-5.2477e+20	-5.4923e+20	-5.258e+20	-5.3047e+20	-5.4493e+20	-5.5756e+20	-5.7664e+20	-5.7711e+20	-5.7654e+20	-5.6936e+20	-5.6131e+20
1.52905	-5.4896e+20	-5.3083e+20	-5.4558e+20	-5.3559e+20	-5.5758e+20	-5.309e+20	-5.2608e+20	-5.5598e+20	-5.6159e+20	-5.8395e+20	-5.6534e+20	-5.6632e+20	-5.8601e+20	-5.613e+20

## Sheet: Figure 4c
Figure 4c	Evolution of 6Li content during cycling at the center of the cell (positive electrode discharge)
	6Li atomic density (at/cm3) at different DoD (%)
Distance (mm)	0	10	20	30	40	50	60	70	80	90	92.5	95	97.5	100
0	1.7273e+21	1.6479e+21	1.6001e+21	1.5683e+21	1.5154e+21	1.5202e+21	1.4855e+21	1.4701e+21	1.3926e+21	1.3679e+21	1.3523e+21	1.3072e+21	1.2908e+21	1.2341e+21
0.00265	1.7974e+21	1.6797e+21	1.6468e+21	1.606e+21	1.5543e+21	1.5521e+21	1.5198e+21	1.526e+21	1.4272e+21	1.3862e+21	1.3769e+21	1.3409e+21	1.317e+21	1.2613e+21
0.0053	1.8538e+21	1.7193e+21	1.7025e+21	1.6549e+21	1.6108e+21	1.5865e+21	1.5717e+21	1.55e+21	1.4926e+21	1.4314e+21	1.4171e+21	1.3893e+21	1.3341e+21	1.2815e+21
0.00795	1.9074e+21	1.7893e+21	1.7472e+21	1.6753e+21	1.6705e+21	1.6349e+21	1.6051e+21	1.575e+21	1.5282e+21	1.4679e+21	1.45e+21	1.4215e+21	1.3711e+21	1.3045e+21
0.0106	1.9493e+21	1.8268e+21	1.8041e+21	1.7121e+21	1.7207e+21	1.6861e+21	1.6448e+21	1.6077e+21	1.5555e+21	1.5116e+21	1.5005e+21	1.4451e+21	1.4005e+21	1.3236e+21
0.01325	2.0132e+21	1.8776e+21	1.8584e+21	1.7621e+21	1.7614e+21	1.7461e+21	1.6929e+21	1.6499e+21	1.6063e+21	1.542e+21	1.5364e+21	1.5004e+21	1.4311e+21	1.3661e+21
0.0159	2.0771e+21	1.9423e+21	1.9177e+21	1.8276e+21	1.7999e+21	1.795e+21	1.7457e+21	1.6826e+21	1.6815e+21	1.6069e+21	1.5743e+21	1.5305e+21	1.4649e+21	1.4189e+21
0.01855	2.1225e+21	1.9826e+21	1.9905e+21	1.9061e+21	1.8573e+21	1.8449e+21	1.7926e+21	1.7503e+21	1.7186e+21	1.6568e+21	1.6073e+21	1.5607e+21	1.5111e+21	1.4596e+21
0.0212	2.1728e+21	2.0372e+21	2.0355e+21	1.9598e+21	1.9153e+21	1.8847e+21	1.8518e+21	1.8269e+21	1.7657e+21	1.7186e+21	1.6285e+21	1.6144e+21	1.5508e+21	1.5079e+21
0.02385	2.2389e+21	2.1122e+21	2.0891e+21	2.0028e+21	1.9708e+21	1.9336e+21	1.9112e+21	1.8736e+21	1.8166e+21	1.7594e+21	1.6704e+21	1.657e+21	1.5756e+21	1.5525e+21
0.0265	2.3012e+21	2.1884e+21	2.1466e+21	2.0774e+21	2.0332e+21	1.9811e+21	1.9568e+21	1.932e+21	1.8519e+21	1.7845e+21	1.743e+21	1.7032e+21	1.6128e+21	1.5837e+21
0.02915	2.3627e+21	2.2378e+21	2.2104e+21	2.1411e+21	2.0899e+21	2.0454e+21	2.0066e+21	1.9849e+21	1.8976e+21	1.8348e+21	1.8022e+21	1.7362e+21	1.6448e+21	1.6202e+21
0.0318	2.4318e+21	2.3118e+21	2.2685e+21	2.1942e+21	2.1678e+21	2.1289e+21	2.0525e+21	2.0677e+21	1.9717e+21	1.871e+21	1.852e+21	1.7925e+21	1.6883e+21	1.6875e+21
0.03445	2.4793e+21	2.3945e+21	2.3377e+21	2.2778e+21	2.2525e+21	2.2106e+21	2.1082e+21	2.1232e+21	2.0527e+21	1.93e+21	1.8888e+21	1.8631e+21	1.7388e+21	1.7446e+21
0.0371	2.5639e+21	2.4912e+21	2.3923e+21	2.3489e+21	2.3269e+21	2.2861e+21	2.1801e+21	2.1918e+21	2.1251e+21	1.9839e+21	1.9592e+21	1.9149e+21	1.7918e+21	1.7889e+21
0.03975	2.6648e+21	2.5655e+21	2.4613e+21	2.4137e+21	2.3991e+21	2.3301e+21	2.2572e+21	2.2407e+21	2.1958e+21	2.0406e+21	2.021e+21	1.9489e+21	1.8623e+21	1.8353e+21
0.0424	2.7281e+21	2.6221e+21	2.527e+21	2.5007e+21	2.455e+21	2.412e+21	2.3501e+21	2.2892e+21	2.2516e+21	2.1093e+21	2.0696e+21	2.0147e+21	1.932e+21	1.8913e+21
0.04505	2.8368e+21	2.7236e+21	2.6139e+21	2.5779e+21	2.4927e+21	2.4749e+21	2.4146e+21	2.3381e+21	2.2853e+21	2.1833e+21	2.1086e+21	2.0646e+21	1.9829e+21	1.9417e+21
0.0477	2.9098e+21	2.8297e+21	2.6845e+21	2.6335e+21	2.5575e+21	2.5427e+21	2.4881e+21	2.4056e+21	2.3746e+21	2.2584e+21	2.1791e+21	2.132e+21	2.0303e+21	1.9756e+21
0.05035	3.0359e+21	2.9381e+21	2.747e+21	2.6873e+21	2.6375e+21	2.6207e+21	2.5488e+21	2.4804e+21	2.4429e+21	2.3273e+21	2.2312e+21	2.1934e+21	2.0907e+21	2.0158e+21
0.053	3.1763e+21	3.0203e+21	2.8415e+21	2.7642e+21	2.7072e+21	2.6866e+21	2.6296e+21	2.5522e+21	2.4942e+21	2.3754e+21	2.2923e+21	2.2125e+21	2.1487e+21	2.081e+21
0.05565	3.3358e+21	3.1096e+21	2.9504e+21	2.885e+21	2.8068e+21	2.7664e+21	2.7148e+21	2.6411e+21	2.5518e+21	2.4377e+21	2.3825e+21	2.2605e+21	2.1998e+21	2.1744e+21
0.0583	3.4623e+21	3.2533e+21	3.0716e+21	3.0228e+21	2.9182e+21	2.8761e+21	2.7938e+21	2.7301e+21	2.6342e+21	2.5061e+21	2.4496e+21	2.3494e+21	2.2651e+21	2.2381e+21
0.06095	3.6398e+21	3.3855e+21	3.2391e+21	3.1292e+21	3.0232e+21	3.0048e+21	2.8848e+21	2.7983e+21	2.7281e+21	2.5742e+21	2.5192e+21	2.4357e+21	2.3441e+21	2.2896e+21
0.0636	3.8493e+21	3.5259e+21	3.3828e+21	3.257e+21	3.1138e+21	3.1532e+21	3.0129e+21	2.8848e+21	2.8331e+21	2.6683e+21	2.5829e+21	2.4908e+21	2.3975e+21	2.3546e+21
0.06625	4.0695e+21	3.7039e+21	3.5636e+21	3.3863e+21	3.2268e+21	3.2607e+21	3.1616e+21	3.0075e+21	2.956e+21	2.7937e+21	2.6706e+21	2.5612e+21	2.4582e+21	2.4243e+21
0.0689	4.3494e+21	3.9126e+21	3.7677e+21	3.5404e+21	3.3866e+21	3.3906e+21	3.2915e+21	3.1575e+21	3.1066e+21	2.8976e+21	2.7563e+21	2.6686e+21	2.5355e+21	2.501e+21
0.07155	4.6037e+21	4.1043e+21	3.949e+21	3.7504e+21	3.569e+21	3.5104e+21	3.423e+21	3.2762e+21	3.2322e+21	3.017e+21	2.8801e+21	2.7555e+21	2.6187e+21	2.5845e+21
0.0742	4.891e+21	4.3647e+21	4.1724e+21	4.0084e+21	3.7466e+21	3.7255e+21	3.5601e+21	3.4524e+21	3.3655e+21	3.1489e+21	3.0235e+21	2.8772e+21	2.7202e+21	2.6769e+21
0.07685	5.1971e+21	4.6583e+21	4.4885e+21	4.2574e+21	3.9439e+21	3.9679e+21	3.7871e+21	3.6554e+21	3.5243e+21	3.2708e+21	3.18e+21	2.9867e+21	2.8478e+21	2.8041e+21
0.0795	5.4284e+21	4.9307e+21	4.7262e+21	4.5422e+21	4.1984e+21	4.2293e+21	4.0259e+21	3.8528e+21	3.7069e+21	3.4122e+21	3.284e+21	3.1035e+21	2.9505e+21	2.9236e+21
0.08215	5.609e+21	5.1976e+21	4.9884e+21	4.7786e+21	4.5013e+21	4.4688e+21	4.3095e+21	4.1051e+21	3.9451e+21	3.6157e+21	3.4375e+21	3.2133e+21	3.0855e+21	3.032e+21
0.0848	5.8257e+21	5.417e+21	5.2813e+21	5.0722e+21	4.8111e+21	4.8336e+21	4.5818e+21	4.4325e+21	4.1881e+21	3.8139e+21	3.6181e+21	3.3785e+21	3.2171e+21	3.1694e+21
0.08745	6.0343e+21	5.6484e+21	5.5625e+21	5.3504e+21	5.0845e+21	5.0725e+21	4.86e+21	4.7145e+21	4.4518e+21	4.0098e+21	3.8286e+21	3.5378e+21	3.362e+21	3.3197e+21
0.0901	6.2423e+21	5.9003e+21	5.7743e+21	5.5893e+21	5.3724e+21	5.3105e+21	5.1242e+21	4.9817e+21	4.7159e+21	4.2634e+21	4.1027e+21	3.7588e+21	3.5029e+21	3.4419e+21
0.09275	6.4091e+21	6.0942e+21	5.9893e+21	5.7829e+21	5.6166e+21	5.5723e+21	5.3994e+21	5.2385e+21	4.9843e+21	4.6094e+21	4.3182e+21	4.01e+21	3.7027e+21	3.6666e+21
0.0954	6.5485e+21	6.3513e+21	6.2156e+21	5.9645e+21	5.8239e+21	5.8007e+21	5.6659e+21	5.4615e+21	5.2417e+21	4.9657e+21	4.6222e+21	4.2716e+21	3.9316e+21	3.8923e+21
0.09805	6.7351e+21	6.5186e+21	6.3883e+21	6.1514e+21	6.0092e+21	6.0176e+21	5.8601e+21	5.7164e+21	5.4975e+21	5.2129e+21	4.9631e+21	4.5617e+21	4.1936e+21	4.1729e+21
0.1007	6.8599e+21	6.6686e+21	6.5275e+21	6.3413e+21	6.2438e+21	6.2473e+21	6.0867e+21	5.9751e+21	5.7074e+21	5.4538e+21	5.2082e+21	4.8198e+21	4.4837e+21	4.4072e+21
0.10335	6.9544e+21	6.8101e+21	6.6904e+21	6.5105e+21	6.4318e+21	6.4175e+21	6.2852e+21	6.1556e+21	5.9294e+21	5.6919e+21	5.4305e+21	5.0962e+21	4.8e+21	4.7074e+21
0.106	7.0783e+21	6.9453e+21	6.8592e+21	6.6801e+21	6.5994e+21	6.6219e+21	6.4919e+21	6.3552e+21	6.1797e+21	5.9331e+21	5.6906e+21	5.3989e+21	5.0751e+21	5.0064e+21
0.10865	7.19e+21	7.0632e+21	6.9965e+21	6.792e+21	6.7418e+21	6.745e+21	6.6298e+21	6.5779e+21	6.4307e+21	6.1674e+21	5.8858e+21	5.6474e+21	5.318e+21	5.282e+21
0.1113	7.2685e+21	7.1582e+21	7.087e+21	6.9252e+21	6.8944e+21	6.8587e+21	6.7473e+21	6.7056e+21	6.5935e+21	6.3675e+21	6.105e+21	5.8511e+21	5.5616e+21	5.5127e+21
0.11395	7.3173e+21	7.2373e+21	7.1471e+21	7.0572e+21	7.0165e+21	6.9933e+21	6.9164e+21	6.8301e+21	6.6523e+21	6.592e+21	6.2711e+21	6.0767e+21	5.7643e+21	5.7387e+21
0.1166	7.3601e+21	7.3362e+21	7.176e+21	7.131e+21	7.1107e+21	7.116e+21	7.0355e+21	6.9577e+21	6.8014e+21	6.7079e+21	6.4814e+21	6.2904e+21	5.9851e+21	5.9567e+21
0.11925	7.4372e+21	7.4069e+21	7.2612e+21	7.2365e+21	7.1861e+21	7.2033e+21	7.0742e+21	7.0516e+21	6.9192e+21	6.8299e+21	6.6343e+21	6.517e+21	6.2247e+21	6.1817e+21
0.1219	7.5103e+21	7.4547e+21	7.4289e+21	7.3148e+21	7.2638e+21	7.2839e+21	7.1907e+21	7.142e+21	7.0407e+21	6.9396e+21	6.754e+21	6.6472e+21	6.4778e+21	6.3763e+21
0.12455	7.5678e+21	7.4654e+21	7.4766e+21	7.3954e+21	7.349e+21	7.3746e+21	7.3442e+21	7.2481e+21	7.1453e+21	7.041e+21	6.867e+21	6.7845e+21	6.6146e+21	6.5361e+21
0.1272	7.627e+21	7.5191e+21	7.4834e+21	7.4946e+21	7.4594e+21	7.4521e+21	7.3825e+21	7.3716e+21	7.3015e+21	7.1e+21	7.0582e+21	6.8938e+21	6.74e+21	6.6572e+21
0.12985	7.6715e+21	7.5607e+21	7.5428e+21	7.524e+21	7.5818e+21	7.5283e+21	7.4909e+21	7.4623e+21	7.403e+21	7.2207e+21	7.1599e+21	7.0046e+21	6.8728e+21	6.787e+21
0.1325	7.6958e+21	7.5749e+21	7.5605e+21	7.5298e+21	7.6344e+21	7.5701e+21	7.561e+21	7.5738e+21	7.4399e+21	7.316e+21	7.2604e+21	7.1049e+21	6.9734e+21	6.902e+21
0.13515	7.6623e+21	7.5857e+21	7.6221e+21	7.5618e+21	7.6631e+21	7.6051e+21	7.6162e+21	7.6528e+21	7.5471e+21	7.3825e+21	7.314e+21	7.2016e+21	7.0621e+21	7.0237e+21
0.1378	7.6707e+21	7.6581e+21	7.6481e+21	7.59e+21	7.7181e+21	7.5877e+21	7.6138e+21	7.7052e+21	7.6307e+21	7.4516e+21	7.3831e+21	7.2507e+21	7.1328e+21	7.1562e+21
0.14045	7.6926e+21	7.6873e+21	7.7175e+21	7.5871e+21	7.6841e+21	7.623e+21	7.6431e+21	7.7399e+21	7.6164e+21	7.5496e+21	7.4944e+21	7.3385e+21	7.1987e+21	7.2572e+21
0.1431	7.6806e+21	7.7071e+21	7.7998e+21	7.6277e+21	7.7032e+21	7.6723e+21	7.6836e+21	7.7065e+21	7.5858e+21	7.5786e+21	7.5166e+21	7.4228e+21	7.2905e+21	7.3206e+21
0.14575	7.6677e+21	7.7629e+21	7.8664e+21	7.7098e+21	7.7202e+21	7.7052e+21	7.6974e+21	7.704e+21	7.585e+21	7.646e+21	7.5448e+21	7.4804e+21	7.4067e+21	7.3626e+21
0.1484	7.6954e+21	7.7731e+21	7.8626e+21	7.7719e+21	7.7432e+21	7.7018e+21	7.6872e+21	7.7191e+21	7.6441e+21	7.6638e+21	7.5997e+21	7.5488e+21	7.5288e+21	7.4454e+21
0.15105	7.6799e+21	7.7324e+21	7.8832e+21	7.7741e+21	7.7686e+21	7.7511e+21	7.7258e+21	7.7368e+21	7.6899e+21	7.6436e+21	7.6017e+21	7.6065e+21	7.5971e+21	7.5059e+21
0.1537	7.7152e+21	7.7415e+21	7.8342e+21	7.7882e+21	7.7928e+21	7.7935e+21	7.7275e+21	7.7528e+21	7.681e+21	7.6452e+21	7.6336e+21	7.6178e+21	7.6531e+21	7.5307e+21
0.15635	7.7661e+21	7.722e+21	7.7999e+21	7.7653e+21	7.8403e+21	7.8159e+21	7.7666e+21	7.7574e+21	7.6514e+21	7.664e+21	7.7057e+21	7.6598e+21	7.6764e+21	7.5346e+21
0.159	7.7103e+21	7.7074e+21	7.7452e+21	7.7798e+21	7.8507e+21	7.8344e+21	7.8118e+21	7.7917e+21	7.6826e+21	7.7047e+21	7.737e+21	7.6616e+21	7.7014e+21	7.5236e+21
0.16165	7.6938e+21	7.7014e+21	7.7353e+21	7.7953e+21	7.8633e+21	7.8377e+21	7.8492e+21	7.8481e+21	7.7472e+21	7.7279e+21	7.769e+21	7.6678e+21	7.7266e+21	7.5758e+21
0.1643	7.7065e+21	7.7194e+21	7.7309e+21	7.7203e+21	7.8883e+21	7.8416e+21	7.8319e+21	7.8635e+21	7.8046e+21	7.7393e+21	7.8212e+21	7.6893e+21	7.7342e+21	7.6028e+21
0.16695	7.7256e+21	7.729e+21	7.7323e+21	7.7113e+21	7.8678e+21	7.8762e+21	7.8009e+21	7.8787e+21	7.8199e+21	7.7636e+21	7.8258e+21	7.7171e+21	7.7269e+21	7.6724e+21
0.1696	7.7388e+21	7.712e+21	7.6877e+21	7.7169e+21	7.839e+21	7.869e+21	7.7865e+21	7.8534e+21	7.8063e+21	7.7708e+21	7.8173e+21	7.7849e+21	7.7505e+21	7.727e+21
0.17225	7.7706e+21	7.7223e+21	7.7042e+21	7.7223e+21	7.8218e+21	7.8338e+21	7.7743e+21	7.7872e+21	7.782e+21	7.7706e+21	7.8103e+21	7.8471e+21	7.7755e+21	7.7361e+21
0.1749	7.7719e+21	7.7495e+21	7.7834e+21	7.7269e+21	7.808e+21	7.7928e+21	7.7761e+21	7.7922e+21	7.7516e+21	7.7758e+21	7.7947e+21	7.7957e+21	7.7704e+21	7.7521e+21
0.17755	7.7278e+21	7.7801e+21	7.7943e+21	7.7318e+21	7.8072e+21	7.7939e+21	7.7993e+21	7.8176e+21	7.7117e+21	7.7543e+21	7.7881e+21	7.8139e+21	7.8149e+21	7.7235e+21
0.1802	7.7059e+21	7.8102e+21	7.7404e+21	7.7362e+21	7.7893e+21	7.8112e+21	7.8117e+21	7.8588e+21	7.7624e+21	7.7436e+21	7.8168e+21	7.8366e+21	7.8787e+21	7.7467e+21
0.18285	7.7335e+21	7.8228e+21	7.7597e+21	7.741e+21	7.8017e+21	7.8154e+21	7.8368e+21	7.8631e+21	7.7534e+21	7.7673e+21	7.8086e+21	7.7927e+21	7.914e+21	7.729e+21
0.1855	7.7567e+21	7.8154e+21	7.7339e+21	7.759e+21	7.8219e+21	7.8133e+21	7.8326e+21	7.8788e+21	7.7749e+21	7.7605e+21	7.7664e+21	7.7527e+21	7.8772e+21	7.739e+21
0.18815	7.7289e+21	7.7889e+21	7.7654e+21	7.8013e+21	7.8429e+21	7.8012e+21	7.7818e+21	7.8336e+21	7.7952e+21	7.7897e+21	7.7562e+21	7.7641e+21	7.8982e+21	7.7645e+21
0.1908	7.7075e+21	7.8045e+21	7.7815e+21	7.8121e+21	7.8798e+21	7.8019e+21	7.755e+21	7.8424e+21	7.8003e+21	7.7676e+21	7.7471e+21	7.7366e+21	7.8246e+21	7.7422e+21
0.19345	7.7324e+21	7.8124e+21	7.7733e+21	7.8074e+21	7.8496e+21	7.8112e+21	7.7741e+21	7.908e+21	7.7743e+21	7.7746e+21	7.7998e+21	7.768e+21	7.811e+21	7.7225e+21
0.1961	7.754e+21	7.8082e+21	7.7469e+21	7.7718e+21	7.8424e+21	7.8372e+21	7.8331e+21	7.9026e+21	7.7539e+21	7.7669e+21	7.8279e+21	7.8221e+21	7.8047e+21	7.7536e+21
0.19875	7.7396e+21	7.8441e+21	7.7732e+21	7.7049e+21	7.8223e+21	7.8471e+21	7.8428e+21	7.9479e+21	7.7572e+21	7.7743e+21	7.782e+21	7.8635e+21	7.8249e+21	7.7245e+21
0.2014	7.7242e+21	7.8313e+21	7.7774e+21	7.69e+21	7.834e+21	7.8407e+21	7.8195e+21	7.9337e+21	7.7622e+21	7.7812e+21	7.7703e+21	7.8357e+21	7.8437e+21	7.7479e+21
0.20405	7.6848e+21	7.8164e+21	7.8018e+21	7.6884e+21	7.8723e+21	7.8234e+21	7.7573e+21	7.8896e+21	7.7667e+21	7.8587e+21	7.725e+21	7.8459e+21	7.8371e+21	7.7921e+21
0.2067	7.7096e+21	7.7641e+21	7.8123e+21	7.724e+21	7.8919e+21	7.8145e+21	7.7861e+21	7.8584e+21	7.7907e+21	7.858e+21	7.7905e+21	7.8393e+21	7.8396e+21	7.7584e+21
0.20935	7.7405e+21	7.7688e+21	7.7929e+21	7.7438e+21	7.8454e+21	7.8198e+21	7.784e+21	7.8289e+21	7.8181e+21	7.8645e+21	7.8132e+21	7.8593e+21	7.8672e+21	7.7314e+21
0.212	7.7431e+21	7.7728e+21	7.7154e+21	7.7548e+21	7.8294e+21	7.801e+21	7.7887e+21	7.8299e+21	7.8499e+21	7.8767e+21	7.8406e+21	7.9013e+21	7.8654e+21	7.7554e+21
0.21465	7.7523e+21	7.7828e+21	7.6898e+21	7.7445e+21	7.8294e+21	7.7783e+21	7.8164e+21	7.8598e+21	7.8436e+21	7.9006e+21	7.8066e+21	7.9127e+21	7.8597e+21	7.7618e+21
0.2173	7.7249e+21	7.8063e+21	7.6756e+21	7.7413e+21	7.8439e+21	7.7533e+21	7.7728e+21	7.8709e+21	7.8431e+21	7.8746e+21	7.8287e+21	7.8759e+21	7.8409e+21	7.7797e+21
0.21995	7.6973e+21	7.8348e+21	7.7378e+21	7.7198e+21	7.7967e+21	7.7311e+21	7.7295e+21	7.846e+21	7.8131e+21	7.8833e+21	7.8627e+21	7.9322e+21	7.8691e+21	7.8099e+21
0.2226	7.6966e+21	7.8665e+21	7.786e+21	7.7138e+21	7.7821e+21	7.713e+21	7.7261e+21	7.7431e+21	7.8236e+21	7.8287e+21	7.8989e+21	7.9254e+21	7.8829e+21	7.7975e+21
0.22525	7.7212e+21	7.8479e+21	7.805e+21	7.747e+21	7.7719e+21	7.7866e+21	7.7284e+21	7.7168e+21	7.7329e+21	7.8283e+21	7.8755e+21	7.892e+21	7.8759e+21	7.8411e+21
0.2279	7.7081e+21	7.7677e+21	7.7982e+21	7.7537e+21	7.7857e+21	7.7953e+21	7.7413e+21	7.7229e+21	7.722e+21	7.8218e+21	7.8543e+21	7.8598e+21	7.9122e+21	7.8903e+21
0.23055	7.7023e+21	7.7778e+21	7.7517e+21	7.8227e+21	7.8434e+21	7.7785e+21	7.8042e+21	7.7789e+21	7.7408e+21	7.7994e+21	7.7901e+21	7.8681e+21	7.9052e+21	7.9016e+21
0.2332	7.6857e+21	7.7802e+21	7.7457e+21	7.8191e+21	7.8822e+21	7.8347e+21	7.8782e+21	7.8014e+21	7.7948e+21	7.7776e+21	7.7527e+21	7.8344e+21	7.8823e+21	7.9099e+21
0.23585	7.7315e+21	7.7882e+21	7.7e+21	7.7932e+21	7.8269e+21	7.8841e+21	7.9396e+21	7.8458e+21	7.8084e+21	7.7893e+21	7.773e+21	7.7871e+21	7.8765e+21	7.8647e+21
0.2385	7.7605e+21	7.7855e+21	7.701e+21	7.7964e+21	7.8008e+21	7.873e+21	7.9026e+21	7.8309e+21	7.8655e+21	7.7663e+21	7.8103e+21	7.807e+21	7.8668e+21	7.7978e+21
0.24115	7.78e+21	7.766e+21	7.7537e+21	7.8064e+21	7.8196e+21	7.8836e+21	7.8489e+21	7.7798e+21	7.8541e+21	7.7753e+21	7.8067e+21	7.8183e+21	7.8264e+21	7.7662e+21
0.2438	7.7498e+21	7.7658e+21	7.7509e+21	7.8375e+21	7.7905e+21	7.8624e+21	7.8239e+21	7.7835e+21	7.8329e+21	7.7922e+21	7.7747e+21	7.8487e+21	7.8386e+21	7.7493e+21
0.24645	7.6983e+21	7.7683e+21	7.7315e+21	7.8128e+21	7.7993e+21	7.9007e+21	7.8161e+21	7.792e+21	7.8574e+21	7.8177e+21	7.7469e+21	7.8717e+21	7.8154e+21	7.7704e+21
0.2491	7.6461e+21	7.7842e+21	7.7168e+21	7.8134e+21	7.8367e+21	7.8781e+21	7.8519e+21	7.7798e+21	7.8506e+21	7.7998e+21	7.7531e+21	7.878e+21	7.821e+21	7.8095e+21
0.25175	7.6335e+21	7.7915e+21	7.7544e+21	7.8251e+21	7.9015e+21	7.8861e+21	7.8627e+21	7.764e+21	7.88e+21	7.8151e+21	7.8059e+21	7.8948e+21	7.8148e+21	7.8497e+21
0.2544	7.6558e+21	7.7782e+21	7.7606e+21	7.8172e+21	7.906e+21	7.8818e+21	7.9229e+21	7.7491e+21	7.8794e+21	7.7907e+21	7.8385e+21	7.9281e+21	7.8349e+21	7.8458e+21
0.25705	7.6726e+21	7.7788e+21	7.7603e+21	7.7792e+21	7.8996e+21	7.8863e+21	7.8487e+21	7.7717e+21	7.866e+21	7.7615e+21	7.835e+21	7.9363e+21	7.8407e+21	7.8359e+21
0.2597	7.7218e+21	7.7802e+21	7.779e+21	7.7529e+21	7.9266e+21	7.89e+21	7.7883e+21	7.8353e+21	7.8474e+21	7.7256e+21	7.8048e+21	7.8933e+21	7.8521e+21	7.8151e+21
0.26235	7.7114e+21	7.8229e+21	7.8059e+21	7.7539e+21	7.883e+21	7.8927e+21	7.8058e+21	7.8621e+21	7.8595e+21	7.7441e+21	7.7867e+21	7.8995e+21	7.8634e+21	7.8056e+21
0.265	7.7032e+21	7.8039e+21	7.7992e+21	7.757e+21	7.8302e+21	7.8495e+21	7.8238e+21	7.831e+21	7.9053e+21	7.7633e+21	7.8146e+21	7.877e+21	7.7973e+21	7.8268e+21
0.26765	7.6862e+21	7.8119e+21	7.7815e+21	7.772e+21	7.8386e+21	7.8133e+21	7.8049e+21	7.8312e+21	7.9219e+21	7.7981e+21	7.8509e+21	7.9034e+21	7.7771e+21	7.8629e+21
0.2703	7.7159e+21	7.8185e+21	7.7687e+21	7.7383e+21	7.8328e+21	7.8374e+21	7.8208e+21	7.8131e+21	7.8981e+21	7.842e+21	7.8587e+21	7.8729e+21	7.7999e+21	7.8342e+21
0.27295	7.7755e+21	7.8474e+21	7.8565e+21	7.7295e+21	7.8689e+21	7.8208e+21	7.8237e+21	7.8044e+21	7.8638e+21	7.857e+21	7.8239e+21	7.8489e+21	7.8072e+21	7.8117e+21
0.2756	7.7617e+21	7.8809e+21	7.8988e+21	7.7983e+21	7.8818e+21	7.8036e+21	7.8038e+21	7.8659e+21	7.8384e+21	7.8665e+21	7.7798e+21	7.8187e+21	7.8219e+21	7.819e+21
0.27825	7.7024e+21	7.8748e+21	7.9059e+21	7.8362e+21	7.8722e+21	7.804e+21	7.7353e+21	7.8536e+21	7.8133e+21	7.8608e+21	7.7601e+21	7.8235e+21	7.8954e+21	7.8611e+21
0.2809	7.7142e+21	7.8633e+21	7.8543e+21	7.8837e+21	7.8678e+21	7.8541e+21	7.74e+21	7.8121e+21	7.7737e+21	7.8279e+21	7.7597e+21	7.7782e+21	7.8936e+21	7.8794e+21
0.28355	7.7607e+21	7.8464e+21	7.8434e+21	7.9152e+21	7.8363e+21	7.9257e+21	7.8306e+21	7.812e+21	7.7566e+21	7.8182e+21	7.7446e+21	7.7836e+21	7.8524e+21	7.8454e+21
0.2862	7.7849e+21	7.8183e+21	7.8087e+21	7.8879e+21	7.8237e+21	7.9164e+21	7.9383e+21	7.8605e+21	7.7893e+21	7.7764e+21	7.7577e+21	7.7705e+21	7.8063e+21	7.7968e+21
0.28885	7.7433e+21	7.7756e+21	7.8158e+21	7.8265e+21	7.8403e+21	7.8289e+21	7.933e+21	7.8758e+21	7.8409e+21	7.7829e+21	7.787e+21	7.7566e+21	7.7987e+21	7.8095e+21
0.2915	7.7334e+21	7.7732e+21	7.8047e+21	7.7746e+21	7.8395e+21	7.7894e+21	7.8838e+21	7.8708e+21	7.8625e+21	7.8702e+21	7.7981e+21	7.7593e+21	7.793e+21	7.8187e+21
0.29415	7.7037e+21	7.8034e+21	7.81e+21	7.7355e+21	7.8625e+21	7.8187e+21	7.8613e+21	7.8846e+21	7.8336e+21	7.9384e+21	7.8058e+21	7.7996e+21	7.7667e+21	7.7844e+21
0.2968	7.6862e+21	7.8283e+21	7.8161e+21	7.7438e+21	7.8444e+21	7.8826e+21	7.8301e+21	7.9308e+21	7.8446e+21	7.9077e+21	7.808e+21	7.8583e+21	7.7798e+21	7.7465e+21
0.29945	7.6601e+21	7.8038e+21	7.8107e+21	7.7336e+21	7.8316e+21	7.866e+21	7.7846e+21	7.9228e+21	7.8056e+21	7.8825e+21	7.7764e+21	7.8993e+21	7.8363e+21	7.7497e+21
0.3021	7.6588e+21	7.7777e+21	7.8422e+21	7.7309e+21	7.8057e+21	7.8061e+21	7.7795e+21	7.8364e+21	7.7836e+21	7.8768e+21	7.8286e+21	7.8903e+21	7.8996e+21	7.8316e+21
0.30475	7.7302e+21	7.7532e+21	7.8709e+21	7.6794e+21	7.84e+21	7.8052e+21	7.7947e+21	7.8369e+21	7.7272e+21	7.8841e+21	7.8752e+21	7.8687e+21	7.8622e+21	7.8645e+21
0.3074	7.7467e+21	7.6973e+21	7.8609e+21	7.6401e+21	7.8355e+21	7.7995e+21	7.787e+21	7.8259e+21	7.6845e+21	7.806e+21	7.8827e+21	7.9112e+21	7.8684e+21	7.874e+21
0.31005	7.7059e+21	7.6859e+21	7.8398e+21	7.6593e+21	7.794e+21	7.7861e+21	7.8037e+21	7.8518e+21	7.6601e+21	7.7456e+21	7.8183e+21	7.8943e+21	7.8684e+21	7.863e+21
0.3127	7.6777e+21	7.6753e+21	7.7998e+21	7.6195e+21	7.7577e+21	7.7489e+21	7.7607e+21	7.8118e+21	7.667e+21	7.7094e+21	7.7302e+21	7.8352e+21	7.7948e+21	7.8155e+21
0.31535	7.6483e+21	7.7268e+21	7.7703e+21	7.5107e+21	7.7377e+21	7.74e+21	7.744e+21	7.7012e+21	7.6226e+21	7.7147e+21	7.6646e+21	7.7705e+21	7.7525e+21	7.7611e+21
0.318	7.5941e+21	7.7679e+21	7.7563e+21	7.5007e+21	7.7148e+21	7.7244e+21	7.7586e+21	7.6556e+21	7.6211e+21	7.7135e+21	7.619e+21	7.7143e+21	7.7051e+21	7.7318e+21
0.32065	7.5901e+21	7.7113e+21	7.6933e+21	7.4796e+21	7.7126e+21	7.6997e+21	7.7457e+21	7.6291e+21	7.5989e+21	7.6546e+21	7.5968e+21	7.6703e+21	7.6713e+21	7.6772e+21
0.3233	7.557e+21	7.6029e+21	7.6239e+21	7.492e+21	7.7041e+21	7.6458e+21	7.6931e+21	7.5804e+21	7.6152e+21	7.629e+21	7.5628e+21	7.5893e+21	7.6145e+21	7.559e+21
0.32595	7.5267e+21	7.5257e+21	7.5614e+21	7.5173e+21	7.7045e+21	7.658e+21	7.6491e+21	7.5325e+21	7.5418e+21	7.5917e+21	7.5056e+21	7.5349e+21	7.59e+21	7.5027e+21
0.3286	7.4902e+21	7.4661e+21	7.486e+21	7.4842e+21	7.6386e+21	7.6359e+21	7.6227e+21	7.5094e+21	7.4729e+21	7.5062e+21	7.5017e+21	7.483e+21	7.507e+21	7.479e+21
0.33125	7.4384e+21	7.3908e+21	7.4615e+21	7.4249e+21	7.5686e+21	7.5344e+21	7.565e+21	7.4618e+21	7.3834e+21	7.4307e+21	7.4214e+21	7.3906e+21	7.4515e+21	7.3868e+21
0.3339	7.3347e+21	7.3187e+21	7.4006e+21	7.388e+21	7.4854e+21	7.438e+21	7.4528e+21	7.3742e+21	7.3142e+21	7.354e+21	7.4007e+21	7.3211e+21	7.4124e+21	7.2626e+21
0.33655	7.2562e+21	7.2641e+21	7.3389e+21	7.3279e+21	7.4432e+21	7.3591e+21	7.3453e+21	7.3024e+21	7.2666e+21	7.3317e+21	7.3471e+21	7.2075e+21	7.3177e+21	7.2125e+21
0.3392	7.1962e+21	7.2278e+21	7.2564e+21	7.2583e+21	7.2992e+21	7.2865e+21	7.2556e+21	7.2127e+21	7.1773e+21	7.2502e+21	7.2837e+21	7.1127e+21	7.1791e+21	7.0995e+21
0.34185	7.1023e+21	7.1855e+21	7.1556e+21	7.1342e+21	7.1627e+21	7.1696e+21	7.1275e+21	7.0549e+21	7.0491e+21	7.1717e+21	7.1986e+21	7.072e+21	7.0817e+21	7.0057e+21
0.3445	6.9949e+21	7.0832e+21	7.0652e+21	7.0585e+21	7.0394e+21	7.0647e+21	7.0028e+21	6.9316e+21	6.9167e+21	6.9994e+21	7.1249e+21	7.0137e+21	6.9931e+21	6.8476e+21
0.34715	6.8766e+21	6.9651e+21	6.9846e+21	6.9647e+21	6.9125e+21	6.9535e+21	6.9232e+21	6.7825e+21	6.7748e+21	6.8101e+21	6.9354e+21	6.8696e+21	6.8757e+21	6.6943e+21
0.3498	6.682e+21	6.8073e+21	6.8929e+21	6.8286e+21	6.79e+21	6.8214e+21	6.6872e+21	6.6295e+21	6.6198e+21	6.5812e+21	6.7132e+21	6.6367e+21	6.6955e+21	6.485e+21
0.35245	6.429e+21	6.6064e+21	6.7262e+21	6.6666e+21	6.6474e+21	6.6206e+21	6.4296e+21	6.4046e+21	6.3439e+21	6.3846e+21	6.4869e+21	6.3818e+21	6.4537e+21	6.2741e+21
0.3551	6.1505e+21	6.3717e+21	6.4761e+21	6.4417e+21	6.4415e+21	6.3287e+21	6.2537e+21	6.1832e+21	6.1278e+21	6.1378e+21	6.2743e+21	6.1445e+21	6.1747e+21	6.0284e+21
0.35775	5.929e+21	6.0398e+21	6.1743e+21	6.1822e+21	6.1931e+21	6.1039e+21	5.9692e+21	5.9398e+21	5.8656e+21	5.8458e+21	6.0197e+21	5.9289e+21	5.9239e+21	5.7012e+21
0.3604	5.7211e+21	5.8371e+21	5.8783e+21	5.9312e+21	5.9103e+21	5.7982e+21	5.7326e+21	5.6832e+21	5.6363e+21	5.6055e+21	5.6946e+21	5.6809e+21	5.66e+21	5.4184e+21
0.36305	5.4441e+21	5.5989e+21	5.6256e+21	5.6516e+21	5.6329e+21	5.5473e+21	5.503e+21	5.4361e+21	5.4324e+21	5.3807e+21	5.434e+21	5.4357e+21	5.441e+21	5.226e+21
0.3657	5.2442e+21	5.3667e+21	5.4529e+21	5.4535e+21	5.4468e+21	5.3735e+21	5.2787e+21	5.2813e+21	5.2872e+21	5.2301e+21	5.2659e+21	5.2284e+21	5.2318e+21	5.08e+21
0.36835	5.0935e+21	5.2131e+21	5.2771e+21	5.2652e+21	5.2181e+21	5.2002e+21	5.1419e+21	5.1674e+21	5.1666e+21	5.1022e+21	5.1899e+21	5.0885e+21	5.0784e+21	4.9604e+21
0.371	5.0059e+21	5.0679e+21	5.0726e+21	5.1362e+21	5.0531e+21	5.0636e+21	5.0328e+21	5.0504e+21	5.0624e+21	4.9857e+21	5.1328e+21	4.9552e+21	4.9622e+21	4.8477e+21
0.37365	4.8951e+21	4.9706e+21	5.0086e+21	5.0161e+21	4.9486e+21	4.9572e+21	4.9452e+21	4.9619e+21	4.9716e+21	4.8916e+21	5.0299e+21	4.8828e+21	4.9044e+21	4.8115e+21
0.3763	4.8198e+21	4.8752e+21	4.9152e+21	4.9406e+21	4.863e+21	4.8655e+21	4.8922e+21	4.9035e+21	4.9296e+21	4.8418e+21	4.9287e+21	4.8595e+21	4.852e+21	4.7578e+21
0.37895	4.7387e+21	4.8208e+21	4.8532e+21	4.8632e+21	4.8169e+21	4.797e+21	4.8379e+21	4.8348e+21	4.8893e+21	4.7735e+21	4.8701e+21	4.8227e+21	4.801e+21	4.725e+21
0.3816	4.6742e+21	4.7719e+21	4.7832e+21	4.7927e+21	4.7843e+21	4.7673e+21	4.7729e+21	4.7814e+21	4.8181e+21	4.7255e+21	4.8026e+21	4.7615e+21	4.7574e+21	4.6644e+21
0.38425	4.6129e+21	4.7384e+21	4.7675e+21	4.7603e+21	4.7268e+21	4.7473e+21	4.7103e+21	4.7536e+21	4.7274e+21	4.695e+21	4.7529e+21	4.7071e+21	4.7258e+21	4.6338e+21
0.3869	4.5983e+21	4.7286e+21	4.7408e+21	4.7082e+21	4.6746e+21	4.727e+21	4.6584e+21	4.7068e+21	4.6665e+21	4.6452e+21	4.7096e+21	4.6744e+21	4.7049e+21	4.611e+21
0.38955	4.5547e+21	4.6659e+21	4.6816e+21	4.6648e+21	4.6145e+21	4.6706e+21	4.6022e+21	4.6641e+21	4.6313e+21	4.5791e+21	4.6512e+21	4.6371e+21	4.6872e+21	4.5706e+21
0.3922	4.4799e+21	4.6083e+21	4.5835e+21	4.6183e+21	4.5906e+21	4.6617e+21	4.5897e+21	4.6163e+21	4.6179e+21	4.5722e+21	4.5838e+21	4.5947e+21	4.6194e+21	4.515e+21
0.39485	4.4083e+21	4.5663e+21	4.5418e+21	4.56e+21	4.5461e+21	4.6388e+21	4.5864e+21	4.5974e+21	4.5867e+21	4.5544e+21	4.5412e+21	4.5741e+21	4.5541e+21	4.4868e+21
0.3975	4.4088e+21	4.5362e+21	4.5001e+21	4.5163e+21	4.5406e+21	4.6185e+21	4.5486e+21	4.5697e+21	4.5362e+21	4.5516e+21	4.51e+21	4.5406e+21	4.5112e+21	4.4223e+21
0.40015	4.3929e+21	4.481e+21	4.5021e+21	4.5072e+21	4.523e+21	4.5536e+21	4.5081e+21	4.5381e+21	4.4787e+21	4.5518e+21	4.4989e+21	4.514e+21	4.5029e+21	4.4007e+21
0.4028	4.3486e+21	4.4676e+21	4.4804e+21	4.5149e+21	4.4899e+21	4.526e+21	4.48e+21	4.4729e+21	4.4644e+21	4.523e+21	4.4904e+21	4.5021e+21	4.4725e+21	4.398e+21
0.40545	4.2996e+21	4.4461e+21	4.4438e+21	4.5047e+21	4.466e+21	4.5146e+21	4.4585e+21	4.4261e+21	4.4544e+21	4.4989e+21	4.4693e+21	4.4561e+21	4.4368e+21	4.4039e+21
0.4081	4.2744e+21	4.4242e+21	4.3817e+21	4.4628e+21	4.4499e+21	4.4924e+21	4.4595e+21	4.3901e+21	4.4391e+21	4.4538e+21	4.4281e+21	4.4226e+21	4.429e+21	4.3899e+21
0.41075	4.2649e+21	4.4274e+21	4.3623e+21	4.4235e+21	4.4461e+21	4.4712e+21	4.4573e+21	4.3938e+21	4.4541e+21	4.3955e+21	4.3904e+21	4.3979e+21	4.4371e+21	4.3949e+21
0.4134	4.2404e+21	4.4083e+21	4.3709e+21	4.4136e+21	4.4429e+21	4.4497e+21	4.4492e+21	4.3995e+21	4.4391e+21	4.3944e+21	4.3811e+21	4.3821e+21	4.4294e+21	4.3788e+21
0.41605	4.2349e+21	4.3626e+21	4.3527e+21	4.4191e+21	4.4342e+21	4.4182e+21	4.3967e+21	4.411e+21	4.4046e+21	4.3965e+21	4.3792e+21	4.3529e+21	4.3995e+21	4.3863e+21
0.4187	4.2505e+21	4.3176e+21	4.3345e+21	4.4021e+21	4.4079e+21	4.3986e+21	4.3744e+21	4.4058e+21	4.3706e+21	4.3958e+21	4.3729e+21	4.3569e+21	4.3791e+21	4.3788e+21
0.42135	4.2273e+21	4.2841e+21	4.3233e+21	4.3807e+21	4.3975e+21	4.3888e+21	4.3397e+21	4.4181e+21	4.349e+21	4.3701e+21	4.3623e+21	4.3473e+21	4.4004e+21	4.3477e+21
0.424	4.214e+21	4.2693e+21	4.3097e+21	4.362e+21	4.3777e+21	4.3806e+21	4.3426e+21	4.4115e+21	4.317e+21	4.3597e+21	4.3346e+21	4.3488e+21	4.3924e+21	4.3237e+21
0.42665	4.1877e+21	4.2904e+21	4.2884e+21	4.349e+21	4.3565e+21	4.3352e+21	4.3535e+21	4.4043e+21	4.3046e+21	4.34e+21	4.2962e+21	4.3493e+21	4.3531e+21	4.3143e+21
0.4293	4.1465e+21	4.3454e+21	4.3101e+21	4.2944e+21	4.3381e+21	4.3056e+21	4.3196e+21	4.3539e+21	4.3192e+21	4.3237e+21	4.2882e+21	4.3345e+21	4.3392e+21	4.2896e+21
0.43195	4.1237e+21	4.3327e+21	4.3174e+21	4.2946e+21	4.2743e+21	4.2821e+21	4.2924e+21	4.3037e+21	4.3096e+21	4.3209e+21	4.293e+21	4.3159e+21	4.3407e+21	4.2949e+21
0.4346	4.0932e+21	4.2843e+21	4.2986e+21	4.3211e+21	4.2374e+21	4.2508e+21	4.291e+21	4.2878e+21	4.3019e+21	4.3075e+21	4.2684e+21	4.2966e+21	4.3356e+21	4.315e+21
0.43725	4.0783e+21	4.2736e+21	4.2922e+21	4.3157e+21	4.2231e+21	4.253e+21	4.2691e+21	4.2671e+21	4.3163e+21	4.299e+21	4.2978e+21	4.2972e+21	4.313e+21	4.3066e+21
0.4399	4.0653e+21	4.2509e+21	4.2621e+21	4.2862e+21	4.216e+21	4.2382e+21	4.2447e+21	4.2606e+21	4.327e+21	4.2785e+21	4.2768e+21	4.3247e+21	4.3037e+21	4.2985e+21
0.44255	4.0335e+21	4.2246e+21	4.2241e+21	4.2772e+21	4.2289e+21	4.2494e+21	4.2536e+21	4.2641e+21	4.2952e+21	4.2838e+21	4.2608e+21	4.3286e+21	4.3274e+21	4.2948e+21
0.4452	4.0066e+21	4.1779e+21	4.1879e+21	4.2699e+21	4.2356e+21	4.2575e+21	4.2555e+21	4.2537e+21	4.2837e+21	4.2641e+21	4.2322e+21	4.279e+21	4.2797e+21	4.2966e+21
0.44785	3.9758e+21	4.1762e+21	4.1868e+21	4.2694e+21	4.2431e+21	4.2657e+21	4.2917e+21	4.2777e+21	4.2402e+21	4.2451e+21	4.2252e+21	4.2547e+21	4.2385e+21	4.2715e+21
0.4505	3.9547e+21	4.1559e+21	4.1913e+21	4.2676e+21	4.2298e+21	4.2506e+21	4.2861e+21	4.2726e+21	4.2098e+21	4.2322e+21	4.2532e+21	4.2406e+21	4.2047e+21	4.2609e+21
0.45315	3.9916e+21	4.1218e+21	4.1692e+21	4.2048e+21	4.2283e+21	4.2165e+21	4.2739e+21	4.2413e+21	4.2038e+21	4.2123e+21	4.2561e+21	4.242e+21	4.1995e+21	4.25e+21
0.4558	4.0019e+21	4.1048e+21	4.1498e+21	4.1699e+21	4.2089e+21	4.2163e+21	4.2365e+21	4.1985e+21	4.194e+21	4.2232e+21	4.2489e+21	4.2331e+21	4.2166e+21	4.2277e+21
0.45845	3.9881e+21	4.1076e+21	4.1214e+21	4.1597e+21	4.1644e+21	4.2101e+21	4.1935e+21	4.1558e+21	4.1703e+21	4.2429e+21	4.2159e+21	4.2146e+21	4.2284e+21	4.2145e+21
0.4611	3.9752e+21	4.0981e+21	4.0846e+21	4.139e+21	4.1434e+21	4.2015e+21	4.1689e+21	4.1557e+21	4.1476e+21	4.224e+21	4.2088e+21	4.2197e+21	4.2335e+21	4.2104e+21
0.46375	3.9644e+21	4.0828e+21	4.0593e+21	4.1159e+21	4.1474e+21	4.201e+21	4.1e+21	4.1751e+21	4.1591e+21	4.2105e+21	4.1816e+21	4.2395e+21	4.2152e+21	4.1952e+21
0.4664	3.9825e+21	4.0666e+21	4.0573e+21	4.1227e+21	4.133e+21	4.1645e+21	4.0755e+21	4.1814e+21	4.1244e+21	4.1966e+21	4.1475e+21	4.2236e+21	4.1961e+21	4.1924e+21
0.46905	4.0105e+21	4.071e+21	4.0678e+21	4.1544e+21	4.1306e+21	4.1056e+21	4.1278e+21	4.1657e+21	4.1399e+21	4.1661e+21	4.1662e+21	4.2002e+21	4.1819e+21	4.2218e+21
0.4717	3.9835e+21	4.0703e+21	4.0676e+21	4.1548e+21	4.098e+21	4.094e+21	4.1205e+21	4.1419e+21	4.1143e+21	4.1726e+21	4.1781e+21	4.2031e+21	4.155e+21	4.2282e+21
0.47435	3.9379e+21	4.0546e+21	4.0772e+21	4.1313e+21	4.0724e+21	4.11e+21	4.1278e+21	4.1158e+21	4.0922e+21	4.1558e+21	4.1906e+21	4.1949e+21	4.1427e+21	4.2158e+21
0.477	3.9288e+21	4.039e+21	4.0796e+21	4.1032e+21	4.0732e+21	4.0905e+21	4.1251e+21	4.1221e+21	4.097e+21	4.1477e+21	4.1741e+21	4.1623e+21	4.142e+21	4.2019e+21
0.47965	3.947e+21	4.0175e+21	4.0815e+21	4.0715e+21	4.0947e+21	4.0993e+21	4.1036e+21	4.1008e+21	4.0946e+21	4.1588e+21	4.1464e+21	4.1332e+21	4.1578e+21	4.1802e+21
0.4823	3.936e+21	3.9878e+21	4.0576e+21	4.0694e+21	4.1121e+21	4.113e+21	4.0947e+21	4.0617e+21	4.0758e+21	4.155e+21	4.112e+21	4.1274e+21	4.1668e+21	4.139e+21
0.48495	3.9202e+21	3.953e+21	4.0415e+21	4.0677e+21	4.1121e+21	4.1174e+21	4.083e+21	4.0736e+21	4.0444e+21	4.1733e+21	4.0858e+21	4.1456e+21	4.1559e+21	4.118e+21
0.4876	3.9183e+21	3.9367e+21	4.045e+21	4.0701e+21	4.0822e+21	4.0976e+21	4.0575e+21	4.1018e+21	4.0623e+21	4.1598e+21	4.0736e+21	4.1279e+21	4.0956e+21	4.1231e+21
0.49025	3.8892e+21	3.9308e+21	4.0323e+21	4.0489e+21	4.034e+21	4.0895e+21	4.0571e+21	4.1247e+21	4.0643e+21	4.1478e+21	4.0783e+21	4.0988e+21	4.0892e+21	4.1302e+21
0.4929	3.8566e+21	3.9092e+21	4.0322e+21	4.0073e+21	4.0241e+21	4.0805e+21	4.0414e+21	4.0962e+21	4.0432e+21	4.1435e+21	4.0755e+21	4.0904e+21	4.101e+21	4.1324e+21
0.49555	3.855e+21	3.9195e+21	3.9924e+21	3.9924e+21	4.0374e+21	4.0568e+21	4.0345e+21	4.0499e+21	4.0203e+21	4.1228e+21	4.0796e+21	4.0721e+21	4.0738e+21	4.1052e+21
0.4982	3.8411e+21	3.9253e+21	3.9481e+21	4.0167e+21	4.0553e+21	4.012e+21	3.9879e+21	4.0632e+21	4.0048e+21	4.111e+21	4.072e+21	4.0527e+21	4.0713e+21	4.0945e+21
0.50085	3.8352e+21	3.9192e+21	3.9429e+21	4.0195e+21	4.0643e+21	3.971e+21	3.9823e+21	4.0438e+21	3.9993e+21	4.1301e+21	4.0628e+21	4.0626e+21	4.0933e+21	4.0864e+21
0.5035	3.8279e+21	3.8799e+21	3.9438e+21	3.9902e+21	4.052e+21	3.9492e+21	4.0049e+21	4.0332e+21	3.9766e+21	4.1263e+21	4.061e+21	4.0821e+21	4.0755e+21	4.0664e+21
0.50615	3.8269e+21	3.8604e+21	3.906e+21	4.0047e+21	4.026e+21	3.951e+21	4.0245e+21	4.0232e+21	3.9815e+21	4.077e+21	4.0396e+21	4.0662e+21	4.0678e+21	4.0781e+21
0.5088	3.8071e+21	3.8745e+21	3.8841e+21	3.9885e+21	4.014e+21	3.9248e+21	3.9924e+21	4.0161e+21	3.9875e+21	4.0435e+21	4.0113e+21	4.0605e+21	4.0537e+21	4.0771e+21
0.51145	3.7702e+21	3.8748e+21	3.8833e+21	3.9826e+21	3.9895e+21	3.9061e+21	3.9946e+21	3.9918e+21	3.9993e+21	4.0592e+21	3.9935e+21	4.0323e+21	4.0624e+21	4.0802e+21
0.5141	3.7833e+21	3.847e+21	3.8915e+21	3.9862e+21	3.9698e+21	3.9049e+21	3.9828e+21	3.9718e+21	4.0102e+21	4.0608e+21	4.0169e+21	4.0151e+21	4.08e+21	4.0534e+21
0.51675	3.7754e+21	3.8196e+21	3.8849e+21	3.9709e+21	3.9577e+21	3.9354e+21	3.9678e+21	3.9595e+21	4.0052e+21	4.0558e+21	4.0275e+21	4.0278e+21	4.055e+21	4.0425e+21
0.5194	3.7621e+21	3.8247e+21	3.8423e+21	3.9015e+21	3.925e+21	3.9581e+21	3.9563e+21	3.9377e+21	3.9798e+21	4.0577e+21	4.032e+21	4.0304e+21	4.0554e+21	4.0342e+21
0.52205	3.763e+21	3.8251e+21	3.8194e+21	3.8628e+21	3.9051e+21	3.9579e+21	3.9481e+21	3.9357e+21	3.973e+21	4.058e+21	4.0201e+21	4.0305e+21	4.0211e+21	4.0341e+21
0.5247	3.7602e+21	3.8157e+21	3.8263e+21	3.841e+21	3.9011e+21	3.9214e+21	3.9233e+21	3.9386e+21	3.9442e+21	4.0326e+21	4.023e+21	4.0242e+21	4.0008e+21	4.0227e+21
0.52735	3.7531e+21	3.7987e+21	3.8295e+21	3.8143e+21	3.8657e+21	3.898e+21	3.8918e+21	3.941e+21	3.9546e+21	4.0077e+21	4.0112e+21	3.9967e+21	4.0088e+21	4.0274e+21
0.53	3.784e+21	3.7825e+21	3.8202e+21	3.8078e+21	3.8503e+21	3.8994e+21	3.9095e+21	3.9448e+21	3.9501e+21	3.9864e+21	3.9812e+21	3.9778e+21	4.0181e+21	4.0367e+21
0.53265	3.7798e+21	3.7658e+21	3.7955e+21	3.8303e+21	3.839e+21	3.8981e+21	3.8928e+21	3.9425e+21	3.8996e+21	3.9752e+21	3.9949e+21	4.0107e+21	4.0043e+21	4.019e+21
0.5353	3.7728e+21	3.7866e+21	3.7914e+21	3.8426e+21	3.8379e+21	3.8887e+21	3.8684e+21	3.9256e+21	3.8706e+21	3.9715e+21	3.9719e+21	3.9858e+21	3.9723e+21	4.0009e+21
0.53795	3.7919e+21	3.7753e+21	3.805e+21	3.8277e+21	3.8341e+21	3.8574e+21	3.8419e+21	3.9097e+21	3.8582e+21	3.9435e+21	3.9632e+21	3.9408e+21	3.9464e+21	4.0041e+21
0.5406	3.7882e+21	3.7727e+21	3.8097e+21	3.7956e+21	3.8373e+21	3.8504e+21	3.8601e+21	3.8846e+21	3.8604e+21	3.9409e+21	3.9185e+21	3.9317e+21	3.9409e+21	4.015e+21
0.54325	3.7706e+21	3.7755e+21	3.8188e+21	3.7647e+21	3.8216e+21	3.8307e+21	3.8727e+21	3.8776e+21	3.8506e+21	3.9445e+21	3.907e+21	3.9165e+21	3.936e+21	4.0001e+21
0.5459	3.7456e+21	3.7821e+21	3.8177e+21	3.7414e+21	3.8207e+21	3.8093e+21	3.878e+21	3.8778e+21	3.8319e+21	3.9514e+21	3.885e+21	3.9099e+21	3.9531e+21	3.9797e+21
0.54855	3.7159e+21	3.766e+21	3.8206e+21	3.7675e+21	3.795e+21	3.8178e+21	3.8839e+21	3.8945e+21	3.8527e+21	3.9449e+21	3.874e+21	3.8838e+21	3.9546e+21	3.9492e+21
0.5512	3.7005e+21	3.7624e+21	3.8193e+21	3.7935e+21	3.7762e+21	3.8316e+21	3.877e+21	3.8678e+21	3.8647e+21	3.929e+21	3.8691e+21	3.8595e+21	3.9438e+21	3.9174e+21
0.55385	3.681e+21	3.7547e+21	3.7954e+21	3.8082e+21	3.7697e+21	3.8071e+21	3.8613e+21	3.8263e+21	3.8278e+21	3.915e+21	3.8536e+21	3.8642e+21	3.937e+21	3.9147e+21
0.5565	3.709e+21	3.74e+21	3.7659e+21	3.779e+21	3.7738e+21	3.7791e+21	3.8482e+21	3.857e+21	3.8103e+21	3.8973e+21	3.8734e+21	3.8657e+21	3.9569e+21	3.9087e+21
0.55915	3.6706e+21	3.7214e+21	3.7603e+21	3.7835e+21	3.7873e+21	3.7825e+21	3.832e+21	3.8722e+21	3.8361e+21	3.8636e+21	3.8815e+21	3.8706e+21	3.9473e+21	3.896e+21
0.5618	3.6478e+21	3.6853e+21	3.789e+21	3.7921e+21	3.7995e+21	3.7709e+21	3.8216e+21	3.8701e+21	3.8476e+21	3.8301e+21	3.8564e+21	3.8529e+21	3.9434e+21	3.889e+21
0.56445	3.6362e+21	3.6731e+21	3.7584e+21	3.785e+21	3.8013e+21	3.7654e+21	3.8045e+21	3.8427e+21	3.8223e+21	3.8226e+21	3.8356e+21	3.8282e+21	3.9388e+21	3.8849e+21
0.5671	3.6076e+21	3.6656e+21	3.7287e+21	3.7723e+21	3.7862e+21	3.7877e+21	3.798e+21	3.8331e+21	3.8124e+21	3.825e+21	3.8393e+21	3.8426e+21	3.9204e+21	3.8759e+21
0.56975	3.5815e+21	3.6519e+21	3.7181e+21	3.7329e+21	3.7707e+21	3.7682e+21	3.7911e+21	3.8255e+21	3.8345e+21	3.8276e+21	3.8425e+21	3.8361e+21	3.9281e+21	3.8516e+21
0.5724	3.5678e+21	3.6712e+21	3.7e+21	3.7212e+21	3.7487e+21	3.7729e+21	3.7967e+21	3.8074e+21	3.8527e+21	3.8191e+21	3.828e+21	3.8016e+21	3.9206e+21	3.827e+21
0.57505	3.5632e+21	3.6698e+21	3.6894e+21	3.706e+21	3.7024e+21	3.8013e+21	3.7741e+21	3.7703e+21	3.8413e+21	3.8137e+21	3.8331e+21	3.8046e+21	3.9089e+21	3.8312e+21
0.5777	3.5466e+21	3.6481e+21	3.6845e+21	3.7176e+21	3.6768e+21	3.7708e+21	3.7424e+21	3.7481e+21	3.8282e+21	3.8222e+21	3.8329e+21	3.8275e+21	3.891e+21	3.8385e+21
0.58035	3.5419e+21	3.6254e+21	3.6868e+21	3.7069e+21	3.6504e+21	3.7448e+21	3.689e+21	3.7412e+21	3.7839e+21	3.8277e+21	3.8348e+21	3.8598e+21	3.8634e+21	3.8136e+21
0.583	3.5111e+21	3.5826e+21	3.6492e+21	3.6834e+21	3.6436e+21	3.7311e+21	3.6573e+21	3.7341e+21	3.7727e+21	3.8014e+21	3.8099e+21	3.8677e+21	3.8903e+21	3.8039e+21
0.58565	3.4951e+21	3.5845e+21	3.6339e+21	3.6648e+21	3.6432e+21	3.7054e+21	3.6636e+21	3.708e+21	3.7569e+21	3.7615e+21	3.7961e+21	3.8329e+21	3.9092e+21	3.832e+21
0.5883	3.5021e+21	3.5824e+21	3.6024e+21	3.6734e+21	3.6296e+21	3.6951e+21	3.6841e+21	3.701e+21	3.7404e+21	3.725e+21	3.7894e+21	3.8248e+21	3.8759e+21	3.8548e+21
0.59095	3.4881e+21	3.5792e+21	3.5798e+21	3.6657e+21	3.6301e+21	3.7088e+21	3.675e+21	3.7077e+21	3.6994e+21	3.7245e+21	3.7692e+21	3.8007e+21	3.8576e+21	3.8399e+21
0.5936	3.4982e+21	3.5759e+21	3.5604e+21	3.6792e+21	3.6312e+21	3.692e+21	3.6782e+21	3.6917e+21	3.6888e+21	3.7207e+21	3.7351e+21	3.7925e+21	3.8334e+21	3.8291e+21
0.59625	3.5026e+21	3.5619e+21	3.536e+21	3.6835e+21	3.6187e+21	3.667e+21	3.6631e+21	3.6884e+21	3.692e+21	3.7152e+21	3.7335e+21	3.7917e+21	3.8185e+21	3.8276e+21
0.5989	3.4803e+21	3.5272e+21	3.5349e+21	3.6585e+21	3.6015e+21	3.6555e+21	3.6532e+21	3.6751e+21	3.672e+21	3.7298e+21	3.7493e+21	3.7887e+21	3.7947e+21	3.8223e+21
0.60155	3.4608e+21	3.4867e+21	3.5456e+21	3.6398e+21	3.6051e+21	3.6375e+21	3.6618e+21	3.6921e+21	3.6799e+21	3.7185e+21	3.7336e+21	3.7914e+21	3.7727e+21	3.8003e+21
0.6042	3.4425e+21	3.4669e+21	3.5294e+21	3.6131e+21	3.6099e+21	3.6317e+21	3.6492e+21	3.6943e+21	3.7189e+21	3.6999e+21	3.7249e+21	3.787e+21	3.7474e+21	3.7816e+21
0.60685	3.425e+21	3.4442e+21	3.5101e+21	3.5857e+21	3.5968e+21	3.6222e+21	3.6259e+21	3.6519e+21	3.7073e+21	3.6905e+21	3.7237e+21	3.7706e+21	3.7679e+21	3.7769e+21
0.6095	3.4158e+21	3.419e+21	3.4942e+21	3.5734e+21	3.5691e+21	3.6011e+21	3.6121e+21	3.6229e+21	3.7017e+21	3.6903e+21	3.7512e+21	3.7618e+21	3.777e+21	3.7618e+21
0.61215	3.4385e+21	3.4099e+21	3.4731e+21	3.5419e+21	3.5773e+21	3.5816e+21	3.5943e+21	3.6181e+21	3.662e+21	3.686e+21	3.7643e+21	3.7569e+21	3.7681e+21	3.7574e+21
0.6148	3.4287e+21	3.4314e+21	3.4574e+21	3.5108e+21	3.5716e+21	3.5886e+21	3.5902e+21	3.6158e+21	3.6583e+21	3.6817e+21	3.747e+21	3.7504e+21	3.7654e+21	3.7835e+21
0.61745	3.4049e+21	3.4409e+21	3.4483e+21	3.5088e+21	3.5373e+21	3.5785e+21	3.585e+21	3.6128e+21	3.6549e+21	3.6873e+21	3.7171e+21	3.7263e+21	3.7501e+21	3.7912e+21
0.6201	3.386e+21	3.4221e+21	3.4329e+21	3.4903e+21	3.4943e+21	3.5367e+21	3.573e+21	3.5929e+21	3.6155e+21	3.6661e+21	3.6909e+21	3.7173e+21	3.7246e+21	3.8141e+21
0.62275	3.3832e+21	3.4131e+21	3.4197e+21	3.505e+21	3.4595e+21	3.5272e+21	3.5682e+21	3.5757e+21	3.5831e+21	3.6422e+21	3.6727e+21	3.7094e+21	3.7089e+21	3.776e+21
0.6254	3.3756e+21	3.4179e+21	3.4103e+21	3.5022e+21	3.4719e+21	3.5329e+21	3.5666e+21	3.5534e+21	3.5651e+21	3.6097e+21	3.6368e+21	3.6968e+21	3.6846e+21	3.7551e+21
0.62805	3.3789e+21	3.4294e+21	3.4196e+21	3.4918e+21	3.4757e+21	3.5147e+21	3.5487e+21	3.5474e+21	3.5814e+21	3.5824e+21	3.6173e+21	3.6758e+21	3.6765e+21	3.7375e+21
0.6307	3.3586e+21	3.4393e+21	3.4079e+21	3.5011e+21	3.4821e+21	3.5066e+21	3.5352e+21	3.5564e+21	3.5671e+21	3.5709e+21	3.5965e+21	3.6753e+21	3.6943e+21	3.7292e+21
0.63335	3.3526e+21	3.4139e+21	3.3966e+21	3.4799e+21	3.4846e+21	3.5001e+21	3.5167e+21	3.5572e+21	3.5532e+21	3.5861e+21	3.5851e+21	3.6561e+21	3.6851e+21	3.7184e+21
0.636	3.3525e+21	3.3806e+21	3.3839e+21	3.4834e+21	3.4766e+21	3.4979e+21	3.507e+21	3.5584e+21	3.5429e+21	3.5892e+21	3.5966e+21	3.6462e+21	3.6737e+21	3.6885e+21
0.63865	3.3385e+21	3.3611e+21	3.3462e+21	3.486e+21	3.4771e+21	3.4828e+21	3.5234e+21	3.5723e+21	3.5317e+21	3.5908e+21	3.5744e+21	3.6218e+21	3.6494e+21	3.6977e+21
0.6413	3.3175e+21	3.3601e+21	3.3403e+21	3.4554e+21	3.4818e+21	3.4646e+21	3.5289e+21	3.5834e+21	3.5302e+21	3.5796e+21	3.5755e+21	3.6243e+21	3.6377e+21	3.6982e+21
0.64395	3.31e+21	3.3333e+21	3.3451e+21	3.4117e+21	3.4789e+21	3.458e+21	3.5121e+21	3.5625e+21	3.5312e+21	3.5812e+21	3.5779e+21	3.6262e+21	3.6437e+21	3.6714e+21
0.6466	3.291e+21	3.3253e+21	3.3406e+21	3.3916e+21	3.4728e+21	3.4511e+21	3.4639e+21	3.5215e+21	3.516e+21	3.6129e+21	3.5797e+21	3.6045e+21	3.654e+21	3.6701e+21
0.64925	3.2626e+21	3.3098e+21	3.3208e+21	3.3926e+21	3.4588e+21	3.4197e+21	3.4677e+21	3.5078e+21	3.5213e+21	3.5931e+21	3.5768e+21	3.5922e+21	3.6312e+21	3.6796e+21
0.6519	3.2455e+21	3.3153e+21	3.3214e+21	3.3939e+21	3.429e+21	3.4069e+21	3.4596e+21	3.4961e+21	3.5337e+21	3.54e+21	3.5617e+21	3.5813e+21	3.6093e+21	3.6447e+21
0.65455	3.2285e+21	3.3318e+21	3.3134e+21	3.3837e+21	3.4323e+21	3.4081e+21	3.4619e+21	3.4688e+21	3.5036e+21	3.4978e+21	3.5405e+21	3.5834e+21	3.6106e+21	3.616e+21
0.6572	3.2253e+21	3.3418e+21	3.2987e+21	3.3573e+21	3.4099e+21	3.3997e+21	3.4612e+21	3.4593e+21	3.4766e+21	3.4955e+21	3.5388e+21	3.5656e+21	3.6154e+21	3.6141e+21
0.65985	3.2323e+21	3.3202e+21	3.281e+21	3.3329e+21	3.3882e+21	3.4002e+21	3.4572e+21	3.4441e+21	3.4964e+21	3.5035e+21	3.5248e+21	3.5676e+21	3.6195e+21	3.6172e+21
0.6625	3.2348e+21	3.2988e+21	3.2637e+21	3.3155e+21	3.3801e+21	3.3881e+21	3.4453e+21	3.4297e+21	3.502e+21	3.5025e+21	3.5114e+21	3.5852e+21	3.6088e+21	3.6232e+21
0.66515	3.2382e+21	3.2963e+21	3.2609e+21	3.318e+21	3.365e+21	3.3923e+21	3.4123e+21	3.4041e+21	3.4796e+21	3.4917e+21	3.5067e+21	3.5647e+21	3.5874e+21	3.6335e+21
0.6678	3.2376e+21	3.2956e+21	3.2677e+21	3.3044e+21	3.3541e+21	3.4132e+21	3.3959e+21	3.3589e+21	3.4336e+21	3.4848e+21	3.4885e+21	3.5253e+21	3.5891e+21	3.6306e+21
0.67045	3.2057e+21	3.3023e+21	3.2479e+21	3.3158e+21	3.356e+21	3.4094e+21	3.3881e+21	3.3608e+21	3.4202e+21	3.4805e+21	3.4668e+21	3.4982e+21	3.578e+21	3.6077e+21
0.6731	3.1957e+21	3.2835e+21	3.2251e+21	3.3166e+21	3.3352e+21	3.4185e+21	3.3877e+21	3.3736e+21	3.4164e+21	3.4351e+21	3.4831e+21	3.4931e+21	3.5474e+21	3.5886e+21
0.67575	3.1903e+21	3.2491e+21	3.2403e+21	3.308e+21	3.3147e+21	3.4172e+21	3.3897e+21	3.3698e+21	3.4208e+21	3.4289e+21	3.5042e+21	3.4927e+21	3.521e+21	3.5915e+21
0.6784	3.1876e+21	3.202e+21	3.2328e+21	3.277e+21	3.3108e+21	3.3899e+21	3.3756e+21	3.3815e+21	3.4181e+21	3.4435e+21	3.4721e+21	3.4854e+21	3.5264e+21	3.5941e+21
0.68105	3.188e+21	3.1973e+21	3.2204e+21	3.2821e+21	3.3172e+21	3.3432e+21	3.3559e+21	3.4014e+21	3.4099e+21	3.4485e+21	3.4639e+21	3.4706e+21	3.4995e+21	3.5633e+21
0.6837	3.1831e+21	3.2007e+21	3.1957e+21	3.2679e+21	3.3041e+21	3.2989e+21	3.3256e+21	3.376e+21	3.3959e+21	3.447e+21	3.4669e+21	3.4562e+21	3.4835e+21	3.5446e+21
0.68635	3.1675e+21	3.2042e+21	3.1845e+21	3.2557e+21	3.3027e+21	3.2877e+21	3.3368e+21	3.3601e+21	3.3917e+21	3.4548e+21	3.4681e+21	3.458e+21	3.4903e+21	3.5347e+21
0.689	3.1572e+21	3.1942e+21	3.191e+21	3.2535e+21	3.292e+21	3.2707e+21	3.3358e+21	3.323e+21	3.3904e+21	3.4318e+21	3.4638e+21	3.452e+21	3.488e+21	3.5541e+21
0.69165	3.1554e+21	3.1887e+21	3.1989e+21	3.2699e+21	3.2861e+21	3.2686e+21	3.3215e+21	3.3115e+21	3.3956e+21	3.4183e+21	3.4377e+21	3.4438e+21	3.5006e+21	3.539e+21
0.6943	3.149e+21	3.1907e+21	3.2169e+21	3.2271e+21	3.2684e+21	3.2607e+21	3.2953e+21	3.2583e+21	3.3637e+21	3.4045e+21	3.4252e+21	3.4245e+21	3.512e+21	3.5162e+21
0.69695	3.1334e+21	3.1839e+21	3.1989e+21	3.2003e+21	3.2484e+21	3.2455e+21	3.2648e+21	3.2253e+21	3.3417e+21	3.3806e+21	3.3966e+21	3.4357e+21	3.4989e+21	3.5042e+21
0.6996	3.1409e+21	3.1873e+21	3.164e+21	3.2192e+21	3.2303e+21	3.2319e+21	3.2706e+21	3.2153e+21	3.3409e+21	3.348e+21	3.3635e+21	3.4578e+21	3.4735e+21	3.503e+21
0.70225	3.1215e+21	3.1736e+21	3.1651e+21	3.1998e+21	3.2204e+21	3.1968e+21	3.2774e+21	3.2348e+21	3.3385e+21	3.3347e+21	3.3323e+21	3.4534e+21	3.4452e+21	3.4948e+21
0.7049	3.0909e+21	3.1657e+21	3.1807e+21	3.1843e+21	3.209e+21	3.197e+21	3.2795e+21	3.2204e+21	3.346e+21	3.33e+21	3.3383e+21	3.4115e+21	3.411e+21	3.474e+21
0.70755	3.0867e+21	3.1473e+21	3.1662e+21	3.1838e+21	3.1896e+21	3.1926e+21	3.2596e+21	3.2127e+21	3.3395e+21	3.3326e+21	3.3356e+21	3.3813e+21	3.38e+21	3.444e+21
0.7102	3.0905e+21	3.1536e+21	3.1593e+21	3.1682e+21	3.2027e+21	3.2202e+21	3.2425e+21	3.217e+21	3.3356e+21	3.2968e+21	3.331e+21	3.3897e+21	3.3884e+21	3.4409e+21
0.71285	3.0834e+21	3.1384e+21	3.1262e+21	3.1508e+21	3.2032e+21	3.2044e+21	3.2496e+21	3.2205e+21	3.3138e+21	3.2987e+21	3.3282e+21	3.4016e+21	3.3956e+21	3.4251e+21
0.7155	3.0766e+21	3.1029e+21	3.1116e+21	3.1482e+21	3.204e+21	3.1855e+21	3.2628e+21	3.2172e+21	3.2952e+21	3.298e+21	3.3115e+21	3.4002e+21	3.3722e+21	3.4377e+21
0.71815	3.0422e+21	3.098e+21	3.1165e+21	3.1522e+21	3.2139e+21	3.1762e+21	3.2571e+21	3.1831e+21	3.2876e+21	3.2803e+21	3.2973e+21	3.3881e+21	3.3682e+21	3.463e+21
0.7208	3.0242e+21	3.0868e+21	3.1076e+21	3.157e+21	3.1976e+21	3.1802e+21	3.2379e+21	3.1639e+21	3.2854e+21	3.2889e+21	3.2906e+21	3.3432e+21	3.3656e+21	3.4466e+21
0.72345	3.0162e+21	3.0713e+21	3.0893e+21	3.1219e+21	3.1803e+21	3.149e+21	3.2044e+21	3.1831e+21	3.2762e+21	3.279e+21	3.3021e+21	3.3013e+21	3.3588e+21	3.4018e+21
0.7261	3.0094e+21	3.0727e+21	3.0835e+21	3.101e+21	3.1578e+21	3.1319e+21	3.1824e+21	3.2162e+21	3.2445e+21	3.2902e+21	3.2849e+21	3.3097e+21	3.343e+21	3.3886e+21
0.72875	2.9797e+21	3.0647e+21	3.0552e+21	3.1016e+21	3.144e+21	3.1205e+21	3.1546e+21	3.2134e+21	3.2286e+21	3.282e+21	3.2647e+21	3.3138e+21	3.3427e+21	3.389e+21
0.7314	2.963e+21	3.0653e+21	3.0341e+21	3.0792e+21	3.1451e+21	3.1274e+21	3.1421e+21	3.2062e+21	3.2124e+21	3.2559e+21	3.2688e+21	3.2879e+21	3.3574e+21	3.3988e+21
0.73405	2.9536e+21	3.05e+21	3.0264e+21	3.063e+21	3.1353e+21	3.1195e+21	3.1369e+21	3.1974e+21	3.2023e+21	3.2439e+21	3.2458e+21	3.2803e+21	3.3436e+21	3.4031e+21
0.7367	2.943e+21	3.0271e+21	2.9795e+21	3.0603e+21	3.1079e+21	3.0967e+21	3.128e+21	3.1978e+21	3.1996e+21	3.2289e+21	3.2107e+21	3.2643e+21	3.3356e+21	3.4035e+21
0.73935	2.9297e+21	3.0058e+21	2.9531e+21	3.0283e+21	3.0586e+21	3.0932e+21	3.106e+21	3.191e+21	3.2161e+21	3.2305e+21	3.2037e+21	3.2533e+21	3.3156e+21	3.3962e+21
0.742	2.9277e+21	2.9877e+21	2.958e+21	3.0024e+21	3.0429e+21	3.0839e+21	3.0693e+21	3.1412e+21	3.1933e+21	3.2196e+21	3.2053e+21	3.2402e+21	3.2879e+21	3.3771e+21
0.74465	2.9163e+21	2.9625e+21	2.9586e+21	2.9884e+21	3.0297e+21	3.0714e+21	3.0552e+21	3.1235e+21	3.1847e+21	3.1739e+21	3.1787e+21	3.2402e+21	3.2662e+21	3.3151e+21
0.7473	2.8843e+21	2.9426e+21	2.9591e+21	2.9678e+21	3.0073e+21	3.0629e+21	3.0259e+21	3.0953e+21	3.1628e+21	3.1421e+21	3.1434e+21	3.2445e+21	3.2816e+21	3.2732e+21
0.74995	2.8579e+21	2.915e+21	2.9529e+21	2.9565e+21	2.9818e+21	3.0465e+21	3.0267e+21	3.0547e+21	3.1467e+21	3.1288e+21	3.1411e+21	3.2211e+21	3.3067e+21	3.2682e+21
0.7526	2.8247e+21	2.8817e+21	2.928e+21	2.9428e+21	2.9667e+21	2.9948e+21	3.0162e+21	3.0306e+21	3.0907e+21	3.1219e+21	3.169e+21	3.1794e+21	3.2867e+21	3.2717e+21
0.75525	2.7996e+21	2.8698e+21	2.9156e+21	2.9226e+21	2.9543e+21	2.9801e+21	3.0106e+21	3.0244e+21	3.0719e+21	3.1123e+21	3.154e+21	3.1488e+21	3.2467e+21	3.2661e+21
0.7579	2.7981e+21	2.8593e+21	2.8925e+21	2.9102e+21	2.9367e+21	2.9874e+21	2.9886e+21	3.0263e+21	3.0652e+21	3.113e+21	3.1109e+21	3.1601e+21	3.2336e+21	3.2401e+21
0.76055	2.7847e+21	2.8491e+21	2.8758e+21	2.9108e+21	2.9347e+21	2.9686e+21	2.9982e+21	3.0302e+21	3.0535e+21	3.1188e+21	3.1033e+21	3.1793e+21	3.2207e+21	3.2355e+21
0.7632	2.7764e+21	2.8346e+21	2.859e+21	2.9057e+21	2.9043e+21	2.9513e+21	2.9806e+21	3.0053e+21	3.0441e+21	3.091e+21	3.1019e+21	3.1673e+21	3.2072e+21	3.2025e+21
0.76585	2.7664e+21	2.8337e+21	2.8382e+21	2.863e+21	2.8887e+21	2.9214e+21	2.9481e+21	2.9583e+21	3.0374e+21	3.0662e+21	3.0861e+21	3.133e+21	3.179e+21	3.1677e+21
0.7685	2.758e+21	2.8261e+21	2.8495e+21	2.8294e+21	2.8742e+21	2.9389e+21	2.9233e+21	2.9592e+21	3.0375e+21	3.0578e+21	3.0769e+21	3.1289e+21	3.1793e+21	3.1654e+21
0.77115	2.7503e+21	2.8219e+21	2.826e+21	2.8322e+21	2.8725e+21	2.9156e+21	2.9113e+21	2.9624e+21	3.0206e+21	3.0639e+21	3.1046e+21	3.1247e+21	3.1493e+21	3.179e+21
0.7738	2.7411e+21	2.7891e+21	2.803e+21	2.85e+21	2.8763e+21	2.9049e+21	2.9352e+21	2.9766e+21	3.0325e+21	3.0645e+21	3.0845e+21	3.121e+21	3.1114e+21	3.1915e+21
0.77645	2.7657e+21	2.7729e+21	2.7835e+21	2.8341e+21	2.8696e+21	2.9122e+21	2.9093e+21	2.9696e+21	3.036e+21	3.0322e+21	3.0873e+21	3.1262e+21	3.1434e+21	3.1891e+21
0.7791	2.785e+21	2.7484e+21	2.7825e+21	2.8171e+21	2.8618e+21	2.9033e+21	2.9302e+21	2.9691e+21	3.0223e+21	3.0379e+21	3.0926e+21	3.1193e+21	3.1732e+21	3.1902e+21
0.78175	2.7741e+21	2.7531e+21	2.7926e+21	2.8179e+21	2.8866e+21	2.9046e+21	2.9298e+21	2.9585e+21	3.0034e+21	3.0559e+21	3.0742e+21	3.1223e+21	3.1605e+21	3.1907e+21
0.7844	2.7395e+21	2.7812e+21	2.7883e+21	2.839e+21	2.8984e+21	2.9069e+21	2.9174e+21	2.9349e+21	3.008e+21	3.0621e+21	3.0554e+21	3.1295e+21	3.1617e+21	3.189e+21
0.78705	2.734e+21	2.7872e+21	2.797e+21	2.8161e+21	2.8977e+21	2.9067e+21	2.9192e+21	2.9259e+21	3.002e+21	3.0422e+21	3.0402e+21	3.1353e+21	3.1278e+21	3.1899e+21
0.7897	2.7259e+21	2.777e+21	2.8126e+21	2.7913e+21	2.8645e+21	2.9126e+21	2.9145e+21	2.9002e+21	2.9771e+21	3.0203e+21	3.0323e+21	3.1381e+21	3.1176e+21	3.1786e+21
0.79235	2.7077e+21	2.7638e+21	2.8348e+21	2.7771e+21	2.8542e+21	2.9051e+21	2.919e+21	2.878e+21	2.9441e+21	3.0223e+21	3.0014e+21	3.1392e+21	3.1106e+21	3.1701e+21
0.795	2.6779e+21	2.7537e+21	2.8215e+21	2.7948e+21	2.8632e+21	2.9137e+21	2.9089e+21	2.866e+21	2.9082e+21	3.0452e+21	2.977e+21	3.1061e+21	3.1115e+21	3.1548e+21
0.79765	2.6614e+21	2.7118e+21	2.806e+21	2.8104e+21	2.8474e+21	2.8972e+21	2.9019e+21	2.8669e+21	2.8895e+21	3.0165e+21	2.9753e+21	3.0789e+21	3.115e+21	3.1592e+21
0.8003	2.6417e+21	2.6968e+21	2.7748e+21	2.7943e+21	2.808e+21	2.8891e+21	2.8753e+21	2.8846e+21	2.8928e+21	3.0047e+21	2.975e+21	3.071e+21	3.0804e+21	3.1575e+21
0.80295	2.6393e+21	2.6975e+21	2.7514e+21	2.761e+21	2.7823e+21	2.8675e+21	2.8573e+21	2.8808e+21	2.929e+21	3.0116e+21	2.9656e+21	3.0537e+21	3.0857e+21	3.1621e+21
0.8056	2.6285e+21	2.6836e+21	2.7474e+21	2.7576e+21	2.7755e+21	2.8303e+21	2.8467e+21	2.8724e+21	2.9461e+21	3.0091e+21	2.9668e+21	3.0517e+21	3.0707e+21	3.163e+21
0.80825	2.6195e+21	2.6826e+21	2.7464e+21	2.7483e+21	2.7683e+21	2.8114e+21	2.8652e+21	2.8684e+21	2.9342e+21	2.9983e+21	2.9546e+21	3.0514e+21	3.0735e+21	3.1154e+21
0.8109	2.6215e+21	2.6803e+21	2.7404e+21	2.7394e+21	2.7596e+21	2.7989e+21	2.8598e+21	2.8598e+21	2.9268e+21	3.0095e+21	2.956e+21	3.0657e+21	3.0615e+21	3.084e+21
0.81355	2.6249e+21	2.6629e+21	2.7307e+21	2.7507e+21	2.7612e+21	2.7833e+21	2.8511e+21	2.8594e+21	2.8899e+21	2.9931e+21	2.9576e+21	3.0642e+21	3.0729e+21	3.0943e+21
0.8162	2.6098e+21	2.6563e+21	2.718e+21	2.764e+21	2.7449e+21	2.762e+21	2.8294e+21	2.8435e+21	2.8597e+21	2.9822e+21	2.9461e+21	3.0567e+21	3.0686e+21	3.1196e+21
0.81885	2.6004e+21	2.6628e+21	2.7268e+21	2.7423e+21	2.7423e+21	2.7589e+21	2.8384e+21	2.8543e+21	2.8575e+21	2.9721e+21	2.9256e+21	3.0228e+21	3.0641e+21	3.122e+21
0.8215	2.6048e+21	2.6515e+21	2.7177e+21	2.7303e+21	2.7342e+21	2.7895e+21	2.8521e+21	2.8534e+21	2.8771e+21	2.9549e+21	2.9264e+21	3.0037e+21	3.0571e+21	3.1081e+21
0.82415	2.6078e+21	2.6358e+21	2.6916e+21	2.7172e+21	2.7396e+21	2.7918e+21	2.8412e+21	2.8335e+21	2.8896e+21	2.942e+21	2.9417e+21	2.9875e+21	3.0296e+21	3.1135e+21
0.8268	2.6022e+21	2.6129e+21	2.6686e+21	2.7063e+21	2.746e+21	2.7757e+21	2.8288e+21	2.8387e+21	2.898e+21	2.9306e+21	2.9487e+21	3.008e+21	2.9932e+21	3.1093e+21
0.82945	2.5706e+21	2.5979e+21	2.6588e+21	2.6878e+21	2.7443e+21	2.7569e+21	2.8134e+21	2.8386e+21	2.8892e+21	2.9285e+21	2.9454e+21	3.0142e+21	2.977e+21	3.0913e+21
0.8321	2.5386e+21	2.599e+21	2.6483e+21	2.6765e+21	2.7441e+21	2.7421e+21	2.7946e+21	2.8213e+21	2.8545e+21	2.9255e+21	2.9543e+21	3.0001e+21	2.9913e+21	3.0597e+21
0.83475	2.5466e+21	2.5852e+21	2.6428e+21	2.6598e+21	2.7236e+21	2.7272e+21	2.7793e+21	2.7992e+21	2.8414e+21	2.9032e+21	2.9467e+21	2.9861e+21	3.0063e+21	3.0693e+21
0.8374	2.5513e+21	2.5911e+21	2.6446e+21	2.6436e+21	2.7022e+21	2.7096e+21	2.7785e+21	2.7972e+21	2.8311e+21	2.8953e+21	2.9376e+21	2.9778e+21	3.012e+21	3.0858e+21
0.84005	2.5416e+21	2.5806e+21	2.6319e+21	2.6481e+21	2.7002e+21	2.6905e+21	2.7608e+21	2.7715e+21	2.8167e+21	2.8942e+21	2.924e+21	2.9993e+21	3.0194e+21	3.0778e+21
0.8427	2.5283e+21	2.5609e+21	2.6159e+21	2.6409e+21	2.7244e+21	2.6736e+21	2.7615e+21	2.7622e+21	2.8027e+21	2.9112e+21	2.899e+21	3.0126e+21	3.0215e+21	3.0757e+21
0.84535	2.5405e+21	2.558e+21	2.6075e+21	2.6503e+21	2.7265e+21	2.6701e+21	2.7714e+21	2.7584e+21	2.8215e+21	2.8983e+21	2.9043e+21	2.9963e+21	3e+21	3.0719e+21
0.848	2.5427e+21	2.5387e+21	2.5953e+21	2.6288e+21	2.7004e+21	2.6685e+21	2.7767e+21	2.7322e+21	2.8181e+21	2.8757e+21	2.9111e+21	2.97e+21	2.9534e+21	3.0648e+21
0.85065	2.5288e+21	2.5228e+21	2.5864e+21	2.6127e+21	2.672e+21	2.6452e+21	2.7698e+21	2.7157e+21	2.8042e+21	2.8521e+21	2.9082e+21	2.9555e+21	2.9422e+21	3.0445e+21
0.8533	2.5173e+21	2.4875e+21	2.5662e+21	2.6053e+21	2.6523e+21	2.6161e+21	2.754e+21	2.7228e+21	2.773e+21	2.834e+21	2.88e+21	2.9488e+21	2.9243e+21	3.0348e+21
0.85595	2.4974e+21	2.4855e+21	2.548e+21	2.5847e+21	2.6415e+21	2.5941e+21	2.7428e+21	2.7025e+21	2.7345e+21	2.8203e+21	2.8628e+21	2.9217e+21	2.9095e+21	3.032e+21
0.8586	2.4736e+21	2.5024e+21	2.5473e+21	2.5787e+21	2.6371e+21	2.6031e+21	2.7181e+21	2.7003e+21	2.7393e+21	2.8152e+21	2.8549e+21	2.876e+21	2.9096e+21	3.0163e+21
0.86125	2.4635e+21	2.5057e+21	2.5601e+21	2.5642e+21	2.6192e+21	2.5972e+21	2.6796e+21	2.6925e+21	2.7317e+21	2.809e+21	2.8461e+21	2.8779e+21	2.9084e+21	3.0057e+21
0.8639	2.4754e+21	2.4979e+21	2.5698e+21	2.554e+21	2.613e+21	2.588e+21	2.6634e+21	2.6861e+21	2.729e+21	2.8129e+21	2.8682e+21	2.8763e+21	2.9099e+21	3.0089e+21
0.86655	2.4652e+21	2.4987e+21	2.5768e+21	2.5563e+21	2.619e+21	2.5928e+21	2.6485e+21	2.6699e+21	2.7512e+21	2.7947e+21	2.8662e+21	2.8564e+21	2.9275e+21	3.015e+21
0.8692	2.4583e+21	2.5052e+21	2.5699e+21	2.5755e+21	2.6347e+21	2.5934e+21	2.6739e+21	2.6535e+21	2.7417e+21	2.781e+21	2.8409e+21	2.8521e+21	2.9311e+21	3.0173e+21
0.87185	2.4605e+21	2.4767e+21	2.5707e+21	2.584e+21	2.6365e+21	2.5949e+21	2.6992e+21	2.6704e+21	2.7223e+21	2.7807e+21	2.8322e+21	2.8516e+21	2.9137e+21	3.025e+21
0.8745	2.4384e+21	2.4625e+21	2.5344e+21	2.5548e+21	2.6516e+21	2.6023e+21	2.7028e+21	2.673e+21	2.7157e+21	2.7642e+21	2.8129e+21	2.8563e+21	2.9105e+21	3.0341e+21
0.87715	2.4375e+21	2.4679e+21	2.5045e+21	2.5403e+21	2.6294e+21	2.5951e+21	2.6769e+21	2.6915e+21	2.7157e+21	2.7557e+21	2.7985e+21	2.8364e+21	2.8773e+21	3.0294e+21
0.8798	2.4637e+21	2.4645e+21	2.485e+21	2.5407e+21	2.6033e+21	2.6211e+21	2.6575e+21	2.6949e+21	2.7041e+21	2.7454e+21	2.7927e+21	2.8264e+21	2.8513e+21	3.0045e+21
0.88245	2.4441e+21	2.4484e+21	2.4941e+21	2.5166e+21	2.5963e+21	2.6067e+21	2.662e+21	2.6872e+21	2.7075e+21	2.7689e+21	2.7779e+21	2.8268e+21	2.854e+21	2.9733e+21
0.8851	2.4419e+21	2.4415e+21	2.4807e+21	2.4988e+21	2.6021e+21	2.5884e+21	2.6559e+21	2.6778e+21	2.7297e+21	2.7676e+21	2.7555e+21	2.8323e+21	2.8572e+21	2.9404e+21
0.88775	2.4295e+21	2.4435e+21	2.4762e+21	2.4938e+21	2.579e+21	2.577e+21	2.6529e+21	2.6647e+21	2.7253e+21	2.7648e+21	2.7555e+21	2.8705e+21	2.8581e+21	2.9313e+21
0.8904	2.4096e+21	2.464e+21	2.5033e+21	2.493e+21	2.5666e+21	2.5683e+21	2.666e+21	2.6451e+21	2.6784e+21	2.7626e+21	2.7688e+21	2.8516e+21	2.8727e+21	2.9341e+21
0.89305	2.3905e+21	2.4419e+21	2.4806e+21	2.4943e+21	2.5627e+21	2.5465e+21	2.6699e+21	2.6458e+21	2.6472e+21	2.727e+21	2.7353e+21	2.8351e+21	2.8619e+21	2.9505e+21
0.8957	2.3691e+21	2.4248e+21	2.4709e+21	2.5037e+21	2.526e+21	2.5526e+21	2.6613e+21	2.632e+21	2.6533e+21	2.7027e+21	2.7212e+21	2.8253e+21	2.8489e+21	2.9411e+21
0.89835	2.3599e+21	2.4198e+21	2.4679e+21	2.4973e+21	2.5186e+21	2.5439e+21	2.6221e+21	2.6216e+21	2.6397e+21	2.7217e+21	2.7141e+21	2.8131e+21	2.8493e+21	2.9591e+21
0.901	2.3548e+21	2.4078e+21	2.4578e+21	2.4748e+21	2.5324e+21	2.5428e+21	2.6006e+21	2.6061e+21	2.6421e+21	2.7198e+21	2.7362e+21	2.8008e+21	2.8107e+21	2.9512e+21
0.90365	2.3397e+21	2.4007e+21	2.4454e+21	2.4418e+21	2.5311e+21	2.5448e+21	2.5991e+21	2.599e+21	2.637e+21	2.7011e+21	2.7274e+21	2.7979e+21	2.7977e+21	2.8955e+21
0.9063	2.3165e+21	2.3959e+21	2.446e+21	2.4235e+21	2.5177e+21	2.5341e+21	2.5812e+21	2.6033e+21	2.6158e+21	2.6658e+21	2.7219e+21	2.7999e+21	2.8158e+21	2.8685e+21
0.90895	2.3121e+21	2.3618e+21	2.4284e+21	2.429e+21	2.5154e+21	2.5229e+21	2.575e+21	2.6146e+21	2.5864e+21	2.6367e+21	2.6896e+21	2.7733e+21	2.8128e+21	2.8888e+21
0.9116	2.3054e+21	2.3552e+21	2.4059e+21	2.4135e+21	2.5109e+21	2.5121e+21	2.5668e+21	2.6032e+21	2.5898e+21	2.6394e+21	2.6864e+21	2.7599e+21	2.7978e+21	2.9094e+21
0.91425	2.2975e+21	2.3679e+21	2.3954e+21	2.4144e+21	2.5011e+21	2.5122e+21	2.5459e+21	2.5905e+21	2.5763e+21	2.6395e+21	2.6713e+21	2.7615e+21	2.7586e+21	2.9066e+21
0.9169	2.2887e+21	2.3641e+21	2.3917e+21	2.4209e+21	2.5036e+21	2.508e+21	2.515e+21	2.5799e+21	2.5863e+21	2.6443e+21	2.6799e+21	2.7704e+21	2.7617e+21	2.8753e+21
0.91955	2.2528e+21	2.3531e+21	2.3669e+21	2.4207e+21	2.5049e+21	2.5013e+21	2.4902e+21	2.5663e+21	2.581e+21	2.6556e+21	2.7003e+21	2.7742e+21	2.7977e+21	2.8677e+21
0.9222	2.2385e+21	2.3365e+21	2.3717e+21	2.4094e+21	2.48e+21	2.4935e+21	2.5096e+21	2.5566e+21	2.5583e+21	2.6359e+21	2.6817e+21	2.7515e+21	2.8083e+21	2.8605e+21
0.92485	2.2488e+21	2.3362e+21	2.3787e+21	2.4003e+21	2.4569e+21	2.4982e+21	2.4968e+21	2.5335e+21	2.5535e+21	2.6279e+21	2.6724e+21	2.733e+21	2.7979e+21	2.8686e+21
0.9275	2.2499e+21	2.3403e+21	2.3696e+21	2.3914e+21	2.4495e+21	2.497e+21	2.4776e+21	2.5199e+21	2.5231e+21	2.637e+21	2.6728e+21	2.7407e+21	2.7612e+21	2.8812e+21
0.93015	2.2345e+21	2.3121e+21	2.3589e+21	2.3896e+21	2.4535e+21	2.4788e+21	2.4641e+21	2.5081e+21	2.4978e+21	2.6502e+21	2.6459e+21	2.7139e+21	2.7598e+21	2.8851e+21
0.9328	2.2526e+21	2.2733e+21	2.3548e+21	2.3843e+21	2.4355e+21	2.4684e+21	2.477e+21	2.4971e+21	2.5098e+21	2.6356e+21	2.6291e+21	2.717e+21	2.7494e+21	2.8727e+21
0.93545	2.2639e+21	2.2807e+21	2.3284e+21	2.3609e+21	2.4375e+21	2.441e+21	2.4893e+21	2.4922e+21	2.5232e+21	2.6093e+21	2.6373e+21	2.7288e+21	2.7674e+21	2.8559e+21
0.9381	2.254e+21	2.2647e+21	2.3086e+21	2.336e+21	2.441e+21	2.4243e+21	2.4807e+21	2.4831e+21	2.5234e+21	2.5997e+21	2.6442e+21	2.7103e+21	2.7715e+21	2.8333e+21
0.94075	2.24e+21	2.2589e+21	2.3036e+21	2.3251e+21	2.4264e+21	2.4339e+21	2.4415e+21	2.4784e+21	2.5224e+21	2.584e+21	2.6356e+21	2.6876e+21	2.7546e+21	2.816e+21
0.9434	2.22e+21	2.2565e+21	2.3153e+21	2.333e+21	2.3999e+21	2.4289e+21	2.4373e+21	2.4826e+21	2.5229e+21	2.5717e+21	2.6235e+21	2.6629e+21	2.7532e+21	2.8132e+21
0.94605	2.1909e+21	2.2355e+21	2.3071e+21	2.3171e+21	2.3964e+21	2.415e+21	2.433e+21	2.4946e+21	2.528e+21	2.5696e+21	2.5987e+21	2.667e+21	2.7511e+21	2.7992e+21
0.9487	2.1738e+21	2.2331e+21	2.2887e+21	2.3298e+21	2.416e+21	2.4251e+21	2.4324e+21	2.5015e+21	2.5264e+21	2.5789e+21	2.6086e+21	2.6745e+21	2.7429e+21	2.7997e+21
0.95135	2.1705e+21	2.2149e+21	2.2952e+21	2.333e+21	2.4176e+21	2.4395e+21	2.439e+21	2.4772e+21	2.5118e+21	2.5658e+21	2.6165e+21	2.6764e+21	2.726e+21	2.8019e+21
0.954	2.1709e+21	2.2134e+21	2.2949e+21	2.3105e+21	2.4125e+21	2.4153e+21	2.4374e+21	2.4674e+21	2.4979e+21	2.5552e+21	2.6104e+21	2.6507e+21	2.7312e+21	2.8077e+21
0.95665	2.1744e+21	2.2295e+21	2.2809e+21	2.2983e+21	2.386e+21	2.4049e+21	2.4255e+21	2.4551e+21	2.4922e+21	2.5394e+21	2.6021e+21	2.6255e+21	2.7296e+21	2.7865e+21
0.9593	2.1727e+21	2.2347e+21	2.271e+21	2.297e+21	2.3763e+21	2.3865e+21	2.4027e+21	2.4288e+21	2.4765e+21	2.5299e+21	2.5923e+21	2.6242e+21	2.7357e+21	2.7665e+21
0.96195	2.1816e+21	2.2426e+21	2.2831e+21	2.3172e+21	2.3387e+21	2.3843e+21	2.4071e+21	2.4115e+21	2.4862e+21	2.5221e+21	2.5741e+21	2.6401e+21	2.7101e+21	2.7458e+21
0.9646	2.1697e+21	2.2378e+21	2.2808e+21	2.3102e+21	2.3133e+21	2.3683e+21	2.422e+21	2.4061e+21	2.4813e+21	2.4965e+21	2.5474e+21	2.6354e+21	2.6855e+21	2.7459e+21
0.96725	2.1557e+21	2.2369e+21	2.2828e+21	2.2877e+21	2.3225e+21	2.359e+21	2.4165e+21	2.4188e+21	2.4606e+21	2.4918e+21	2.562e+21	2.6308e+21	2.689e+21	2.7549e+21
0.9699	2.1579e+21	2.2299e+21	2.2719e+21	2.2831e+21	2.33e+21	2.3463e+21	2.3857e+21	2.4018e+21	2.4386e+21	2.4807e+21	2.5684e+21	2.6251e+21	2.7085e+21	2.7574e+21
0.97255	2.1747e+21	2.2259e+21	2.2678e+21	2.2971e+21	2.3314e+21	2.3524e+21	2.3683e+21	2.3961e+21	2.4222e+21	2.5084e+21	2.579e+21	2.6337e+21	2.7257e+21	2.7657e+21
0.9752	2.1806e+21	2.2097e+21	2.291e+21	2.3006e+21	2.337e+21	2.3679e+21	2.3598e+21	2.4139e+21	2.4157e+21	2.5073e+21	2.5624e+21	2.6382e+21	2.7202e+21	2.7632e+21
0.97785	2.1695e+21	2.208e+21	2.3061e+21	2.2986e+21	2.3433e+21	2.3702e+21	2.3834e+21	2.4332e+21	2.4426e+21	2.5136e+21	2.5497e+21	2.6527e+21	2.7145e+21	2.7713e+21
0.9805	2.1738e+21	2.2243e+21	2.301e+21	2.3009e+21	2.3282e+21	2.3564e+21	2.4201e+21	2.4381e+21	2.4574e+21	2.5064e+21	2.5624e+21	2.6594e+21	2.6984e+21	2.7525e+21
0.98315	2.1674e+21	2.2255e+21	2.2973e+21	2.2878e+21	2.3171e+21	2.3524e+21	2.4067e+21	2.4188e+21	2.4549e+21	2.5012e+21	2.5503e+21	2.6721e+21	2.6863e+21	2.7448e+21
0.9858	2.1693e+21	2.223e+21	2.2814e+21	2.2839e+21	2.3128e+21	2.3464e+21	2.389e+21	2.4176e+21	2.4672e+21	2.5127e+21	2.5554e+21	2.6733e+21	2.6648e+21	2.7501e+21
0.98845	2.1509e+21	2.2104e+21	2.2715e+21	2.296e+21	2.3157e+21	2.3129e+21	2.3868e+21	2.4121e+21	2.4615e+21	2.5044e+21	2.5554e+21	2.6623e+21	2.6399e+21	2.755e+21
0.9911	2.1343e+21	2.1862e+21	2.2534e+21	2.2958e+21	2.2949e+21	2.3117e+21	2.3833e+21	2.3976e+21	2.4433e+21	2.5011e+21	2.5427e+21	2.6268e+21	2.6333e+21	2.7799e+21
0.99375	2.1023e+21	2.1855e+21	2.2368e+21	2.2737e+21	2.3093e+21	2.3008e+21	2.3845e+21	2.394e+21	2.428e+21	2.5125e+21	2.5398e+21	2.609e+21	2.6104e+21	2.7817e+21
0.9964	2.1044e+21	2.1718e+21	2.2297e+21	2.2733e+21	2.3098e+21	2.3151e+21	2.3935e+21	2.3742e+21	2.4193e+21	2.5026e+21	2.5276e+21	2.599e+21	2.6227e+21	2.7707e+21
0.99905	2.0977e+21	2.1641e+21	2.2222e+21	2.2468e+21	2.2983e+21	2.3327e+21	2.4057e+21	2.3548e+21	2.4096e+21	2.4792e+21	2.4993e+21	2.6069e+21	2.6281e+21	2.7545e+21
1.0017	2.0844e+21	2.1701e+21	2.2064e+21	2.2157e+21	2.2836e+21	2.3422e+21	2.4079e+21	2.3494e+21	2.4232e+21	2.4826e+21	2.4828e+21	2.6002e+21	2.6286e+21	2.7269e+21
1.00435	2.0754e+21	2.1515e+21	2.2101e+21	2.1932e+21	2.2751e+21	2.3198e+21	2.3874e+21	2.3484e+21	2.4168e+21	2.48e+21	2.483e+21	2.6003e+21	2.6311e+21	2.7207e+21
1.007	2.0931e+21	2.1496e+21	2.1983e+21	2.1995e+21	2.2433e+21	2.3137e+21	2.3521e+21	2.3442e+21	2.3907e+21	2.496e+21	2.5092e+21	2.5987e+21	2.6211e+21	2.7293e+21
1.00965	2.0846e+21	2.1356e+21	2.1795e+21	2.2145e+21	2.2208e+21	2.2964e+21	2.3492e+21	2.329e+21	2.3691e+21	2.4885e+21	2.5134e+21	2.6039e+21	2.6086e+21	2.741e+21
1.0123	2.0764e+21	2.1518e+21	2.1577e+21	2.2206e+21	2.2382e+21	2.2972e+21	2.358e+21	2.3255e+21	2.3628e+21	2.4721e+21	2.505e+21	2.5972e+21	2.6012e+21	2.7555e+21
1.01495	2.0781e+21	2.1536e+21	2.145e+21	2.2127e+21	2.253e+21	2.3064e+21	2.3603e+21	2.3402e+21	2.3538e+21	2.4483e+21	2.5173e+21	2.6124e+21	2.6307e+21	2.7635e+21
1.0176	2.0982e+21	2.1615e+21	2.1655e+21	2.1837e+21	2.263e+21	2.3086e+21	2.337e+21	2.3428e+21	2.3623e+21	2.434e+21	2.5119e+21	2.6151e+21	2.6539e+21	2.7566e+21
1.02025	2.107e+21	2.1582e+21	2.186e+21	2.1818e+21	2.257e+21	2.3007e+21	2.3143e+21	2.3555e+21	2.3745e+21	2.4186e+21	2.4957e+21	2.5967e+21	2.6471e+21	2.7503e+21
1.0229	2.0984e+21	2.1552e+21	2.1828e+21	2.1919e+21	2.2494e+21	2.2774e+21	2.3205e+21	2.368e+21	2.3751e+21	2.4228e+21	2.4817e+21	2.5691e+21	2.6343e+21	2.7517e+21
1.02555	2.0857e+21	2.1502e+21	2.173e+21	2.1939e+21	2.2554e+21	2.2759e+21	2.3259e+21	2.3614e+21	2.3816e+21	2.4335e+21	2.4886e+21	2.5467e+21	2.6258e+21	2.7376e+21
1.0282	2.0944e+21	2.1532e+21	2.1666e+21	2.1696e+21	2.2457e+21	2.3018e+21	2.2995e+21	2.349e+21	2.3771e+21	2.4353e+21	2.4738e+21	2.532e+21	2.6477e+21	2.705e+21
1.03085	2.0586e+21	2.1395e+21	2.1732e+21	2.1664e+21	2.2151e+21	2.3097e+21	2.2805e+21	2.3338e+21	2.371e+21	2.4434e+21	2.4639e+21	2.5226e+21	2.6239e+21	2.695e+21
1.0335	2.0444e+21	2.1211e+21	2.1802e+21	2.1605e+21	2.2069e+21	2.2788e+21	2.2949e+21	2.3095e+21	2.372e+21	2.4362e+21	2.438e+21	2.5135e+21	2.6029e+21	2.7045e+21
1.03615	2.0395e+21	2.1136e+21	2.1735e+21	2.1632e+21	2.2382e+21	2.2637e+21	2.3129e+21	2.3138e+21	2.3802e+21	2.4324e+21	2.426e+21	2.514e+21	2.6016e+21	2.7018e+21
1.0388	2.0489e+21	2.1215e+21	2.1653e+21	2.1737e+21	2.2543e+21	2.2934e+21	2.3211e+21	2.2955e+21	2.3878e+21	2.4357e+21	2.442e+21	2.5203e+21	2.5967e+21	2.6929e+21
1.04145	2.0655e+21	2.1271e+21	2.1662e+21	2.177e+21	2.2502e+21	2.2894e+21	2.3287e+21	2.2963e+21	2.3743e+21	2.4221e+21	2.4379e+21	2.4986e+21	2.5919e+21	2.6643e+21
1.0441	2.0805e+21	2.1074e+21	2.1749e+21	2.1784e+21	2.2261e+21	2.2472e+21	2.335e+21	2.3061e+21	2.3877e+21	2.4138e+21	2.4223e+21	2.4996e+21	2.5865e+21	2.669e+21
1.04675	2.0814e+21	2.0934e+21	2.1694e+21	2.1529e+21	2.2088e+21	2.2316e+21	2.3131e+21	2.295e+21	2.3936e+21	2.4231e+21	2.4126e+21	2.5128e+21	2.6009e+21	2.6847e+21
1.0494	2.0707e+21	2.1055e+21	2.154e+21	2.1299e+21	2.2184e+21	2.2423e+21	2.2855e+21	2.2751e+21	2.3631e+21	2.4366e+21	2.4384e+21	2.5084e+21	2.5658e+21	2.6722e+21
1.05205	2.0713e+21	2.1159e+21	2.153e+21	2.137e+21	2.2037e+21	2.2467e+21	2.2693e+21	2.2623e+21	2.3409e+21	2.4343e+21	2.4327e+21	2.5085e+21	2.5412e+21	2.6815e+21
1.0547	2.0787e+21	2.1182e+21	2.1288e+21	2.1358e+21	2.2046e+21	2.2433e+21	2.259e+21	2.2514e+21	2.3187e+21	2.4139e+21	2.4083e+21	2.511e+21	2.5452e+21	2.6779e+21
1.05735	2.0662e+21	2.123e+21	2.1173e+21	2.1473e+21	2.2201e+21	2.2427e+21	2.2768e+21	2.2408e+21	2.3134e+21	2.4197e+21	2.424e+21	2.5101e+21	2.5761e+21	2.6778e+21
1.06	2.0514e+21	2.0948e+21	2.1081e+21	2.1585e+21	2.2085e+21	2.2354e+21	2.2688e+21	2.2393e+21	2.3209e+21	2.423e+21	2.4304e+21	2.4941e+21	2.5985e+21	2.6919e+21
1.06265	2.0426e+21	2.0944e+21	2.1231e+21	2.1718e+21	2.1942e+21	2.2448e+21	2.2737e+21	2.2507e+21	2.327e+21	2.4128e+21	2.4408e+21	2.4649e+21	2.5778e+21	2.7177e+21
1.0653	2.0453e+21	2.1057e+21	2.1104e+21	2.1486e+21	2.1901e+21	2.234e+21	2.2701e+21	2.2572e+21	2.3321e+21	2.3949e+21	2.4431e+21	2.4708e+21	2.5658e+21	2.7175e+21
1.06795	2.0683e+21	2.1116e+21	2.0971e+21	2.1276e+21	2.1783e+21	2.2148e+21	2.2679e+21	2.2572e+21	2.3278e+21	2.3855e+21	2.4316e+21	2.4647e+21	2.5706e+21	2.7182e+21
1.0706	2.0641e+21	2.1066e+21	2.1046e+21	2.1172e+21	2.1552e+21	2.2185e+21	2.2821e+21	2.2772e+21	2.3235e+21	2.4054e+21	2.4228e+21	2.4649e+21	2.5762e+21	2.7183e+21
1.07325	2.0571e+21	2.0861e+21	2.1098e+21	2.1261e+21	2.1454e+21	2.2186e+21	2.2858e+21	2.2684e+21	2.3273e+21	2.3967e+21	2.4462e+21	2.4542e+21	2.564e+21	2.7238e+21
1.0759	2.0398e+21	2.0662e+21	2.0937e+21	2.1363e+21	2.148e+21	2.1974e+21	2.2698e+21	2.2616e+21	2.3535e+21	2.4045e+21	2.4422e+21	2.465e+21	2.5537e+21	2.716e+21
1.07855	2.0265e+21	2.0724e+21	2.0704e+21	2.1107e+21	2.1474e+21	2.1751e+21	2.2592e+21	2.2701e+21	2.3466e+21	2.4131e+21	2.4531e+21	2.4525e+21	2.5466e+21	2.6836e+21
1.0812	2.0097e+21	2.0569e+21	2.078e+21	2.1126e+21	2.1434e+21	2.1692e+21	2.251e+21	2.2578e+21	2.3166e+21	2.3931e+21	2.4567e+21	2.4547e+21	2.5349e+21	2.6685e+21
1.08385	2.0148e+21	2.0423e+21	2.0837e+21	2.111e+21	2.1273e+21	2.1669e+21	2.2559e+21	2.2344e+21	2.2909e+21	2.3776e+21	2.4467e+21	2.4603e+21	2.5233e+21	2.6678e+21
1.0865	2.0279e+21	2.0537e+21	2.073e+21	2.0934e+21	2.1211e+21	2.1619e+21	2.2253e+21	2.2297e+21	2.2738e+21	2.3582e+21	2.4218e+21	2.4623e+21	2.5328e+21	2.6658e+21
1.08915	2.032e+21	2.0763e+21	2.0668e+21	2.0798e+21	2.1301e+21	2.1574e+21	2.2153e+21	2.233e+21	2.2623e+21	2.3634e+21	2.3925e+21	2.4332e+21	2.5291e+21	2.6683e+21
1.0918	2.0429e+21	2.09e+21	2.0775e+21	2.0819e+21	2.1319e+21	2.1523e+21	2.2218e+21	2.2297e+21	2.2544e+21	2.3859e+21	2.379e+21	2.4361e+21	2.5075e+21	2.6498e+21
1.09445	2.0474e+21	2.073e+21	2.0605e+21	2.0719e+21	2.1118e+21	2.1346e+21	2.2091e+21	2.2348e+21	2.2398e+21	2.3798e+21	2.3654e+21	2.4517e+21	2.5163e+21	2.6409e+21
1.0971	2.001e+21	2.0564e+21	2.0403e+21	2.0854e+21	2.1058e+21	2.139e+21	2.1983e+21	2.2248e+21	2.2453e+21	2.3518e+21	2.3622e+21	2.4299e+21	2.5108e+21	2.6279e+21
1.09975	1.9667e+21	2.0623e+21	2.0494e+21	2.0872e+21	2.0965e+21	2.1387e+21	2.1967e+21	2.2045e+21	2.2335e+21	2.3344e+21	2.3765e+21	2.4096e+21	2.5111e+21	2.5997e+21
1.1024	1.9561e+21	2.05e+21	2.0488e+21	2.0847e+21	2.1076e+21	2.1337e+21	2.1826e+21	2.2273e+21	2.2346e+21	2.3355e+21	2.3651e+21	2.4057e+21	2.4926e+21	2.5781e+21
1.10505	1.9655e+21	2.0171e+21	2.0551e+21	2.0727e+21	2.0942e+21	2.1283e+21	2.1768e+21	2.2238e+21	2.2383e+21	2.3454e+21	2.3489e+21	2.4021e+21	2.4895e+21	2.5636e+21
1.1077	1.9583e+21	2.0115e+21	2.0614e+21	2.0695e+21	2.093e+21	2.1182e+21	2.1713e+21	2.2246e+21	2.2444e+21	2.3351e+21	2.3267e+21	2.3952e+21	2.4928e+21	2.5522e+21
1.11035	1.9718e+21	2.0052e+21	2.0656e+21	2.0655e+21	2.0992e+21	2.1e+21	2.1737e+21	2.2164e+21	2.2492e+21	2.3217e+21	2.3405e+21	2.401e+21	2.4696e+21	2.5542e+21
1.113	2.0024e+21	1.9853e+21	2.0573e+21	2.0416e+21	2.0975e+21	2.0928e+21	2.1624e+21	2.2028e+21	2.2309e+21	2.3098e+21	2.3359e+21	2.4126e+21	2.4422e+21	2.5465e+21
1.11565	1.9727e+21	1.9782e+21	2.0281e+21	2.0248e+21	2.1006e+21	2.0772e+21	2.1506e+21	2.2009e+21	2.2546e+21	2.297e+21	2.3191e+21	2.4129e+21	2.4245e+21	2.5315e+21
1.1183	1.9691e+21	1.991e+21	2.0109e+21	1.9985e+21	2.1024e+21	2.0846e+21	2.136e+21	2.1739e+21	2.2646e+21	2.2891e+21	2.3264e+21	2.3876e+21	2.4379e+21	2.5277e+21
1.12095	1.9627e+21	1.9796e+21	1.9872e+21	1.9861e+21	2.0874e+21	2.0678e+21	2.1165e+21	2.1743e+21	2.2393e+21	2.2592e+21	2.3378e+21	2.3687e+21	2.4363e+21	2.5297e+21
1.1236	1.9354e+21	1.9779e+21	1.9692e+21	1.9936e+21	2.0853e+21	2.0267e+21	2.1019e+21	2.1669e+21	2.212e+21	2.2353e+21	2.3137e+21	2.358e+21	2.4338e+21	2.5199e+21
1.12625	1.9121e+21	1.9628e+21	1.9524e+21	1.9887e+21	2.0579e+21	1.9989e+21	2.0953e+21	2.1337e+21	2.1933e+21	2.241e+21	2.2902e+21	2.3432e+21	2.4447e+21	2.5118e+21
1.1289	1.8762e+21	1.9315e+21	1.9431e+21	1.9837e+21	2.0065e+21	1.9932e+21	2.0765e+21	2.1151e+21	2.1673e+21	2.2548e+21	2.2791e+21	2.3367e+21	2.4413e+21	2.5012e+21
1.13155	1.8415e+21	1.8985e+21	1.9312e+21	1.9713e+21	1.9859e+21	1.9837e+21	2.0461e+21	2.1092e+21	2.1491e+21	2.2357e+21	2.2894e+21	2.3467e+21	2.4241e+21	2.5044e+21
1.1342	1.8434e+21	1.8791e+21	1.9282e+21	1.9667e+21	1.982e+21	1.9783e+21	2.0385e+21	2.1084e+21	2.1571e+21	2.2486e+21	2.3085e+21	2.3591e+21	2.419e+21	2.5275e+21
1.13685	1.8407e+21	1.8756e+21	1.936e+21	1.9912e+21	1.9759e+21	2.0077e+21	2.0468e+21	2.1101e+21	2.1533e+21	2.2533e+21	2.3181e+21	2.3661e+21	2.4346e+21	2.5695e+21
1.1395	1.8499e+21	1.8718e+21	1.9442e+21	1.9892e+21	1.9942e+21	2.0079e+21	2.0469e+21	2.1251e+21	2.15e+21	2.2439e+21	2.3147e+21	2.3427e+21	2.4631e+21	2.5735e+21
1.14215	1.863e+21	1.8626e+21	1.9396e+21	1.9839e+21	2.0098e+21	2.0093e+21	2.038e+21	2.1113e+21	2.1383e+21	2.2171e+21	2.2913e+21	2.3129e+21	2.4613e+21	2.5738e+21
1.1448	1.8458e+21	1.8511e+21	1.9087e+21	1.9698e+21	2.0001e+21	2.0212e+21	2.0321e+21	2.0873e+21	2.1208e+21	2.2134e+21	2.2765e+21	2.2967e+21	2.4386e+21	2.5644e+21
1.14745	1.8053e+21	1.8273e+21	1.8698e+21	1.9239e+21	1.996e+21	1.9879e+21	2.0378e+21	2.0617e+21	2.125e+21	2.2079e+21	2.2647e+21	2.2932e+21	2.4251e+21	2.5458e+21
1.1501	1.7721e+21	1.8065e+21	1.8345e+21	1.884e+21	1.9659e+21	1.9482e+21	2.0301e+21	2.0318e+21	2.1518e+21	2.2063e+21	2.2435e+21	2.2969e+21	2.417e+21	2.5607e+21
1.15275	1.7511e+21	1.7849e+21	1.8247e+21	1.8648e+21	1.939e+21	1.9191e+21	2.0213e+21	2.0199e+21	2.1497e+21	2.224e+21	2.2543e+21	2.302e+21	2.4182e+21	2.5601e+21
1.1554	1.741e+21	1.7784e+21	1.8335e+21	1.8558e+21	1.9176e+21	1.9044e+21	2.0157e+21	2.0399e+21	2.1577e+21	2.2069e+21	2.2629e+21	2.3283e+21	2.4198e+21	2.5601e+21
1.15805	1.7511e+21	1.7708e+21	1.8346e+21	1.8506e+21	1.916e+21	1.9108e+21	2.0113e+21	2.0518e+21	2.1387e+21	2.1897e+21	2.2715e+21	2.3596e+21	2.4216e+21	2.5397e+21
1.1607	1.7634e+21	1.7588e+21	1.8342e+21	1.8357e+21	1.91e+21	1.9083e+21	2.0193e+21	2.046e+21	2.1169e+21	2.1831e+21	2.2694e+21	2.3614e+21	2.4189e+21	2.5135e+21
1.16335	1.7329e+21	1.7587e+21	1.8206e+21	1.8417e+21	1.9038e+21	1.9114e+21	1.9993e+21	2.0351e+21	2.1056e+21	2.1681e+21	2.2605e+21	2.3416e+21	2.4194e+21	2.5266e+21
1.166	1.6969e+21	1.7493e+21	1.8124e+21	1.8357e+21	1.9044e+21	1.9152e+21	1.9832e+21	2.003e+21	2.0931e+21	2.1404e+21	2.2398e+21	2.3126e+21	2.3972e+21	2.5009e+21
1.16865	1.6703e+21	1.7159e+21	1.7988e+21	1.8061e+21	1.891e+21	1.9262e+21	1.9712e+21	1.983e+21	2.0622e+21	2.128e+21	2.2249e+21	2.3157e+21	2.3841e+21	2.465e+21
1.1713	1.6436e+21	1.6821e+21	1.7752e+21	1.7987e+21	1.8704e+21	1.902e+21	1.9741e+21	1.9767e+21	2.0369e+21	2.1294e+21	2.2241e+21	2.3085e+21	2.3802e+21	2.4714e+21
1.17395	1.6267e+21	1.6498e+21	1.749e+21	1.7652e+21	1.8396e+21	1.874e+21	1.9591e+21	1.9671e+21	2.0274e+21	2.1197e+21	2.2103e+21	2.2959e+21	2.3606e+21	2.4651e+21
1.1766	1.629e+21	1.6258e+21	1.7284e+21	1.767e+21	1.828e+21	1.8645e+21	1.9362e+21	1.9486e+21	2.0128e+21	2.1279e+21	2.1849e+21	2.2657e+21	2.3335e+21	2.4526e+21
1.17925	1.6018e+21	1.6266e+21	1.7074e+21	1.7593e+21	1.8189e+21	1.8482e+21	1.9254e+21	1.9377e+21	1.9994e+21	2.1147e+21	2.1823e+21	2.2534e+21	2.3166e+21	2.4349e+21
1.1819	1.5871e+21	1.6067e+21	1.6804e+21	1.7445e+21	1.8133e+21	1.8261e+21	1.9127e+21	1.9582e+21	1.9787e+21	2.0929e+21	2.1829e+21	2.2628e+21	2.3093e+21	2.4265e+21
1.18455	1.5775e+21	1.5881e+21	1.6659e+21	1.7341e+21	1.8151e+21	1.8032e+21	1.9117e+21	1.9453e+21	1.9641e+21	2.0881e+21	2.1723e+21	2.2571e+21	2.3009e+21	2.4264e+21
1.1872	1.5605e+21	1.5776e+21	1.6426e+21	1.7102e+21	1.808e+21	1.7956e+21	1.9097e+21	1.9343e+21	1.9809e+21	2.085e+21	2.1625e+21	2.264e+21	2.3153e+21	2.446e+21
1.18985	1.5405e+21	1.5686e+21	1.6137e+21	1.692e+21	1.8155e+21	1.7714e+21	1.8956e+21	1.9326e+21	1.9874e+21	2.0487e+21	2.1514e+21	2.2536e+21	2.3155e+21	2.4398e+21
1.1925	1.5008e+21	1.5489e+21	1.5818e+21	1.6806e+21	1.7611e+21	1.7548e+21	1.8606e+21	1.9045e+21	1.9815e+21	1.9992e+21	2.1292e+21	2.2267e+21	2.2919e+21	2.4126e+21
1.19515	1.4764e+21	1.5252e+21	1.553e+21	1.6588e+21	1.7108e+21	1.73e+21	1.8246e+21	1.8837e+21	1.9563e+21	1.9849e+21	2.1033e+21	2.2245e+21	2.2769e+21	2.3755e+21
1.1978	1.4585e+21	1.4841e+21	1.5364e+21	1.6145e+21	1.6657e+21	1.7128e+21	1.7809e+21	1.8347e+21	1.9354e+21	1.9992e+21	2.1018e+21	2.2044e+21	2.2505e+21	2.377e+21
1.20045	1.4576e+21	1.468e+21	1.5262e+21	1.5855e+21	1.6334e+21	1.6976e+21	1.7774e+21	1.8032e+21	1.8928e+21	2.0124e+21	2.1093e+21	2.1976e+21	2.2462e+21	2.3722e+21
1.2031	1.4459e+21	1.4684e+21	1.5235e+21	1.5737e+21	1.6197e+21	1.6735e+21	1.7628e+21	1.8102e+21	1.8645e+21	2.0042e+21	2.0896e+21	2.1879e+21	2.2597e+21	2.3521e+21
1.20575	1.417e+21	1.4663e+21	1.502e+21	1.5611e+21	1.6259e+21	1.6635e+21	1.7474e+21	1.7894e+21	1.8488e+21	1.9676e+21	2.056e+21	2.1824e+21	2.2473e+21	2.3564e+21
1.2084	1.4003e+21	1.4602e+21	1.4943e+21	1.5486e+21	1.6046e+21	1.6628e+21	1.7439e+21	1.7777e+21	1.8236e+21	1.9424e+21	2.0243e+21	2.18e+21	2.2502e+21	2.331e+21
1.21105	1.3911e+21	1.4441e+21	1.4905e+21	1.5242e+21	1.5904e+21	1.643e+21	1.7226e+21	1.7625e+21	1.8206e+21	1.9355e+21	2.0165e+21	2.1549e+21	2.2481e+21	2.3274e+21
1.2137	1.3844e+21	1.4289e+21	1.4969e+21	1.5239e+21	1.5919e+21	1.6274e+21	1.7087e+21	1.7703e+21	1.8006e+21	1.9224e+21	2.0106e+21	2.14e+21	2.2391e+21	2.3154e+21
1.21635	1.3733e+21	1.413e+21	1.4939e+21	1.5208e+21	1.5922e+21	1.615e+21	1.7002e+21	1.7622e+21	1.7997e+21	1.9406e+21	2.0108e+21	2.1304e+21	2.2316e+21	2.2846e+21
1.219	1.3601e+21	1.4062e+21	1.4852e+21	1.5203e+21	1.5919e+21	1.6345e+21	1.7012e+21	1.7545e+21	1.7967e+21	1.9582e+21	2.0002e+21	2.129e+21	2.2152e+21	2.2674e+21
1.22165	1.3537e+21	1.3959e+21	1.472e+21	1.5049e+21	1.5793e+21	1.6455e+21	1.6768e+21	1.7546e+21	1.7945e+21	1.9303e+21	1.9989e+21	2.1088e+21	2.174e+21	2.2492e+21
1.2243	1.3433e+21	1.3836e+21	1.4502e+21	1.4895e+21	1.5672e+21	1.6338e+21	1.666e+21	1.7373e+21	1.7882e+21	1.9104e+21	1.9821e+21	2.0923e+21	2.1686e+21	2.2384e+21
1.22695	1.3294e+21	1.3721e+21	1.4331e+21	1.4762e+21	1.5369e+21	1.6201e+21	1.6419e+21	1.7178e+21	1.7784e+21	1.9051e+21	1.9703e+21	2.0786e+21	2.1513e+21	2.2469e+21
1.2296	1.3093e+21	1.3632e+21	1.4225e+21	1.4723e+21	1.5231e+21	1.6059e+21	1.6369e+21	1.7036e+21	1.7583e+21	1.9151e+21	1.9649e+21	2.0844e+21	2.1671e+21	2.233e+21
1.23225	1.3004e+21	1.3552e+21	1.4017e+21	1.4545e+21	1.5116e+21	1.5833e+21	1.6281e+21	1.6859e+21	1.7705e+21	1.9229e+21	1.9641e+21	2.0847e+21	2.1625e+21	2.2239e+21
1.2349	1.2948e+21	1.3348e+21	1.3752e+21	1.4547e+21	1.511e+21	1.5728e+21	1.625e+21	1.6785e+21	1.7871e+21	1.8921e+21	1.9722e+21	2.0864e+21	2.1615e+21	2.2252e+21
1.23755	1.2836e+21	1.336e+21	1.3865e+21	1.4559e+21	1.5069e+21	1.5671e+21	1.6209e+21	1.6798e+21	1.7736e+21	1.8804e+21	1.9551e+21	2.1004e+21	2.1706e+21	2.2245e+21
1.2402	1.2768e+21	1.3415e+21	1.3962e+21	1.4505e+21	1.4991e+21	1.5745e+21	1.6027e+21	1.6678e+21	1.756e+21	1.8757e+21	1.9426e+21	2.0921e+21	2.1702e+21	2.2214e+21
1.24285	1.2645e+21	1.3242e+21	1.3929e+21	1.4261e+21	1.4871e+21	1.5678e+21	1.6013e+21	1.6669e+21	1.7475e+21	1.8615e+21	1.9448e+21	2.0933e+21	2.1636e+21	2.2273e+21
1.2455	1.2352e+21	1.298e+21	1.376e+21	1.4089e+21	1.4941e+21	1.5413e+21	1.6056e+21	1.6624e+21	1.7266e+21	1.8658e+21	1.9277e+21	2.0851e+21	2.1501e+21	2.2159e+21
1.24815	1.2066e+21	1.2899e+21	1.3554e+21	1.406e+21	1.4789e+21	1.5417e+21	1.6034e+21	1.6562e+21	1.7386e+21	1.8679e+21	1.9242e+21	2.0701e+21	2.1334e+21	2.213e+21
1.2508	1.2025e+21	1.2817e+21	1.3457e+21	1.394e+21	1.474e+21	1.5376e+21	1.5793e+21	1.6607e+21	1.735e+21	1.8441e+21	1.9199e+21	2.0625e+21	2.102e+21	2.2156e+21
1.25345	1.2174e+21	1.2759e+21	1.343e+21	1.4003e+21	1.455e+21	1.5268e+21	1.557e+21	1.6676e+21	1.7349e+21	1.8318e+21	1.9201e+21	2.0546e+21	2.0855e+21	2.2026e+21
1.2561	1.2293e+21	1.262e+21	1.3342e+21	1.3965e+21	1.4309e+21	1.5164e+21	1.5526e+21	1.665e+21	1.7247e+21	1.8196e+21	1.9199e+21	2.034e+21	2.077e+21	2.1916e+21
1.25875	1.2249e+21	1.2538e+21	1.3331e+21	1.3778e+21	1.4151e+21	1.5051e+21	1.5504e+21	1.6434e+21	1.7144e+21	1.816e+21	1.9251e+21	2.0226e+21	2.0669e+21	2.2015e+21
1.2614	1.2098e+21	1.2567e+21	1.3352e+21	1.3591e+21	1.4194e+21	1.4893e+21	1.5615e+21	1.6388e+21	1.704e+21	1.8165e+21	1.9119e+21	2.0019e+21	2.0405e+21	2.2167e+21
1.26405	1.206e+21	1.2624e+21	1.3147e+21	1.3549e+21	1.4219e+21	1.4841e+21	1.5825e+21	1.6389e+21	1.6768e+21	1.8004e+21	1.9077e+21	1.9858e+21	2.0319e+21	2.2206e+21
1.2667	1.1984e+21	1.2753e+21	1.2861e+21	1.3535e+21	1.4061e+21	1.4938e+21	1.5713e+21	1.636e+21	1.6704e+21	1.7937e+21	1.8939e+21	1.974e+21	2.0459e+21	2.2065e+21
1.26935	1.1992e+21	1.2923e+21	1.293e+21	1.342e+21	1.4168e+21	1.4936e+21	1.5538e+21	1.619e+21	1.6505e+21	1.822e+21	1.8996e+21	1.9889e+21	2.0328e+21	2.2082e+21
1.272	1.199e+21	1.2883e+21	1.3102e+21	1.34e+21	1.424e+21	1.4905e+21	1.5568e+21	1.5991e+21	1.6523e+21	1.8095e+21	1.8778e+21	1.9987e+21	2.0248e+21	2.1922e+21
1.27465	1.2112e+21	1.2755e+21	1.2981e+21	1.3438e+21	1.4251e+21	1.4489e+21	1.535e+21	1.5892e+21	1.6572e+21	1.7837e+21	1.859e+21	1.9965e+21	2.0284e+21	2.1547e+21
1.2773	1.2132e+21	1.2437e+21	1.279e+21	1.3315e+21	1.415e+21	1.4357e+21	1.5103e+21	1.5677e+21	1.6536e+21	1.7925e+21	1.8505e+21	1.9918e+21	2.0207e+21	2.1305e+21
1.27995	1.1926e+21	1.2129e+21	1.258e+21	1.305e+21	1.4155e+21	1.4404e+21	1.503e+21	1.5486e+21	1.6384e+21	1.7951e+21	1.8327e+21	1.9807e+21	1.9962e+21	2.1181e+21
1.2826	1.1751e+21	1.1961e+21	1.254e+21	1.3043e+21	1.3994e+21	1.4476e+21	1.5083e+21	1.5407e+21	1.6294e+21	1.7736e+21	1.8285e+21	1.9741e+21	1.9773e+21	2.11e+21
1.28525	1.1736e+21	1.1741e+21	1.245e+21	1.2993e+21	1.3676e+21	1.4504e+21	1.514e+21	1.5536e+21	1.634e+21	1.7622e+21	1.8271e+21	1.9698e+21	2.0003e+21	2.1169e+21
1.2879	1.1713e+21	1.169e+21	1.2337e+21	1.2891e+21	1.3505e+21	1.4637e+21	1.5171e+21	1.552e+21	1.6381e+21	1.7604e+21	1.8356e+21	1.9492e+21	2.0076e+21	2.0991e+21
1.29055	1.1639e+21	1.1575e+21	1.2254e+21	1.2598e+21	1.3369e+21	1.4557e+21	1.5244e+21	1.5302e+21	1.6336e+21	1.7652e+21	1.8338e+21	1.9452e+21	1.9997e+21	2.1071e+21
1.2932	1.1536e+21	1.1424e+21	1.2166e+21	1.2575e+21	1.3156e+21	1.425e+21	1.4963e+21	1.5406e+21	1.622e+21	1.7676e+21	1.8329e+21	1.9506e+21	1.9844e+21	2.0855e+21
1.29585	1.1502e+21	1.1647e+21	1.2112e+21	1.2528e+21	1.3027e+21	1.4044e+21	1.4862e+21	1.5504e+21	1.6189e+21	1.7643e+21	1.8191e+21	1.9614e+21	1.9754e+21	2.0819e+21
1.2985	1.159e+21	1.1498e+21	1.2113e+21	1.2606e+21	1.308e+21	1.4139e+21	1.4749e+21	1.5331e+21	1.614e+21	1.7445e+21	1.798e+21	1.9544e+21	1.9707e+21	2.077e+21
1.30115	1.154e+21	1.1344e+21	1.2165e+21	1.2466e+21	1.3099e+21	1.4173e+21	1.4534e+21	1.5219e+21	1.5985e+21	1.731e+21	1.7915e+21	1.9379e+21	1.9783e+21	2.0728e+21
1.3038	1.128e+21	1.1366e+21	1.2053e+21	1.2318e+21	1.3051e+21	1.4104e+21	1.4478e+21	1.5123e+21	1.597e+21	1.7211e+21	1.7908e+21	1.9387e+21	1.9807e+21	2.074e+21
1.30645	1.1224e+21	1.1342e+21	1.2001e+21	1.2206e+21	1.3064e+21	1.3928e+21	1.4391e+21	1.4887e+21	1.59e+21	1.7422e+21	1.766e+21	1.9364e+21	1.9934e+21	2.0667e+21
1.3091	1.122e+21	1.1389e+21	1.2074e+21	1.2199e+21	1.3002e+21	1.3912e+21	1.4449e+21	1.4886e+21	1.55e+21	1.7309e+21	1.746e+21	1.9314e+21	1.9909e+21	2.0724e+21
1.31175	1.1125e+21	1.1433e+21	1.1927e+21	1.2104e+21	1.3019e+21	1.3716e+21	1.458e+21	1.4836e+21	1.5455e+21	1.698e+21	1.7522e+21	1.9165e+21	1.9467e+21	2.0666e+21
1.3144	1.1238e+21	1.1316e+21	1.2024e+21	1.2124e+21	1.2927e+21	1.345e+21	1.4503e+21	1.4697e+21	1.56e+21	1.6845e+21	1.7464e+21	1.9112e+21	1.9307e+21	2.0548e+21
1.31705	1.131e+21	1.1258e+21	1.1972e+21	1.2193e+21	1.2698e+21	1.3519e+21	1.4258e+21	1.4571e+21	1.5598e+21	1.678e+21	1.7422e+21	1.8833e+21	1.9344e+21	2.0374e+21
1.3197	1.1342e+21	1.127e+21	1.1839e+21	1.2158e+21	1.2722e+21	1.3563e+21	1.41e+21	1.4603e+21	1.5488e+21	1.6718e+21	1.7241e+21	1.8697e+21	1.9114e+21	2.039e+21
1.32235	1.1152e+21	1.1206e+21	1.1759e+21	1.2046e+21	1.2755e+21	1.3575e+21	1.4085e+21	1.4642e+21	1.5415e+21	1.6661e+21	1.698e+21	1.8626e+21	1.8966e+21	2.0379e+21
1.325	1.0949e+21	1.1171e+21	1.1676e+21	1.2095e+21	1.2681e+21	1.3399e+21	1.4046e+21	1.4547e+21	1.5228e+21	1.6549e+21	1.6885e+21	1.8382e+21	1.8754e+21	2.0177e+21
1.32765	1.0854e+21	1.1036e+21	1.1816e+21	1.2041e+21	1.2655e+21	1.3399e+21	1.4096e+21	1.4432e+21	1.4878e+21	1.6364e+21	1.6875e+21	1.8077e+21	1.8727e+21	2.0023e+21
1.3303	1.0921e+21	1.0995e+21	1.1823e+21	1.1923e+21	1.2685e+21	1.3448e+21	1.4119e+21	1.4592e+21	1.4699e+21	1.6253e+21	1.6821e+21	1.8012e+21	1.8679e+21	2.0073e+21
1.33295	1.0874e+21	1.097e+21	1.1752e+21	1.1858e+21	1.2718e+21	1.3412e+21	1.4075e+21	1.4517e+21	1.498e+21	1.6155e+21	1.6965e+21	1.8011e+21	1.8774e+21	2.0004e+21
1.3356	1.0892e+21	1.0956e+21	1.1675e+21	1.2041e+21	1.2582e+21	1.3299e+21	1.4099e+21	1.4507e+21	1.5052e+21	1.6121e+21	1.6805e+21	1.8025e+21	1.8988e+21	2.0016e+21
1.33825	1.1e+21	1.0857e+21	1.1597e+21	1.1995e+21	1.2531e+21	1.3211e+21	1.4031e+21	1.4357e+21	1.5042e+21	1.6179e+21	1.6829e+21	1.8024e+21	1.9064e+21	1.9869e+21
1.3409	1.1139e+21	1.0835e+21	1.1447e+21	1.1954e+21	1.2497e+21	1.3049e+21	1.3964e+21	1.4244e+21	1.5137e+21	1.6045e+21	1.6805e+21	1.7911e+21	1.8921e+21	1.9686e+21
1.34355	1.0942e+21	1.0725e+21	1.1339e+21	1.1868e+21	1.2433e+21	1.3145e+21	1.3778e+21	1.4207e+21	1.4994e+21	1.6008e+21	1.6706e+21	1.7874e+21	1.8667e+21	1.9595e+21
1.3462	1.0686e+21	1.0603e+21	1.1109e+21	1.1664e+21	1.23e+21	1.3011e+21	1.3814e+21	1.4002e+21	1.4878e+21	1.606e+21	1.6564e+21	1.789e+21	1.8615e+21	1.9516e+21
1.34885	1.0603e+21	1.0606e+21	1.1138e+21	1.1385e+21	1.2138e+21	1.2856e+21	1.3744e+21	1.3683e+21	1.4712e+21	1.6088e+21	1.6474e+21	1.776e+21	1.8566e+21	1.9519e+21
1.3515	1.0417e+21	1.065e+21	1.1137e+21	1.1314e+21	1.2158e+21	1.2565e+21	1.3427e+21	1.3539e+21	1.446e+21	1.6007e+21	1.63e+21	1.7654e+21	1.8501e+21	1.9608e+21
1.35415	1.0203e+21	1.0565e+21	1.1067e+21	1.1312e+21	1.2035e+21	1.2443e+21	1.329e+21	1.3376e+21	1.4352e+21	1.5791e+21	1.629e+21	1.7563e+21	1.8464e+21	1.9431e+21
1.3568	1.0052e+21	1.0454e+21	1.0859e+21	1.1284e+21	1.1995e+21	1.249e+21	1.2979e+21	1.3453e+21	1.4321e+21	1.5503e+21	1.6035e+21	1.7531e+21	1.8499e+21	1.9112e+21
1.35945	1.0003e+21	1.0213e+21	1.0745e+21	1.1108e+21	1.18e+21	1.2494e+21	1.2802e+21	1.3398e+21	1.4169e+21	1.5333e+21	1.5832e+21	1.7401e+21	1.8369e+21	1.8842e+21
1.3621	1.0021e+21	1.0038e+21	1.0713e+21	1.0811e+21	1.1688e+21	1.22e+21	1.2623e+21	1.3102e+21	1.404e+21	1.5112e+21	1.5597e+21	1.7156e+21	1.8155e+21	1.8604e+21
1.36475	9.8987e+20	9.8708e+20	1.0584e+21	1.0637e+21	1.1642e+21	1.1967e+21	1.2455e+21	1.2767e+21	1.4116e+21	1.4922e+21	1.5621e+21	1.6788e+21	1.7941e+21	1.85e+21
1.3674	9.7737e+20	9.8533e+20	1.01e+21	1.0396e+21	1.1468e+21	1.1763e+21	1.231e+21	1.2592e+21	1.369e+21	1.4673e+21	1.5495e+21	1.6549e+21	1.7494e+21	1.8416e+21
1.37005	9.5661e+20	9.7078e+20	9.9045e+20	1.0208e+21	1.1251e+21	1.155e+21	1.2325e+21	1.2343e+21	1.3302e+21	1.4403e+21	1.4967e+21	1.6235e+21	1.7167e+21	1.792e+21
1.3727	9.206e+20	9.5156e+20	9.7801e+20	1.0117e+21	1.1088e+21	1.1408e+21	1.2026e+21	1.2216e+21	1.2994e+21	1.4201e+21	1.4762e+21	1.5862e+21	1.6898e+21	1.7508e+21
1.37535	9.0167e+20	9.1365e+20	9.7842e+20	1.0113e+21	1.0912e+21	1.1107e+21	1.164e+21	1.2168e+21	1.2915e+21	1.3924e+21	1.4523e+21	1.5494e+21	1.662e+21	1.7082e+21
1.378	8.8513e+20	8.7982e+20	9.6177e+20	9.9528e+20	1.0627e+21	1.0833e+21	1.1187e+21	1.1887e+21	1.2804e+21	1.362e+21	1.4037e+21	1.5174e+21	1.6085e+21	1.6635e+21
1.38065	8.4704e+20	8.5129e+20	9.0834e+20	9.6416e+20	1.0285e+21	1.0669e+21	1.0781e+21	1.1418e+21	1.2514e+21	1.3299e+21	1.337e+21	1.4751e+21	1.5713e+21	1.6283e+21
1.3833	8.1502e+20	8.3088e+20	8.6878e+20	9.2273e+20	1.0066e+21	1.0342e+21	1.0417e+21	1.1123e+21	1.2131e+21	1.2777e+21	1.3165e+21	1.442e+21	1.5413e+21	1.584e+21
1.38595	7.8481e+20	7.9252e+20	8.2389e+20	8.7589e+20	9.6183e+20	9.8993e+20	1.0127e+21	1.0623e+21	1.1634e+21	1.2154e+21	1.275e+21	1.3803e+21	1.4898e+21	1.5363e+21
1.3886	7.3607e+20	7.4246e+20	7.9292e+20	8.3374e+20	9.0823e+20	9.4544e+20	9.7392e+20	1.0034e+21	1.0707e+21	1.1607e+21	1.23e+21	1.3254e+21	1.4309e+21	1.483e+21
1.39125	6.8504e+20	6.971e+20	7.5453e+20	7.939e+20	8.4619e+20	8.9925e+20	9.2824e+20	9.3781e+20	9.945e+20	1.1231e+21	1.164e+21	1.2545e+21	1.358e+21	1.399e+21
1.3939	6.0711e+20	6.5939e+20	6.954e+20	7.342e+20	7.9572e+20	8.1016e+20	8.5755e+20	8.6216e+20	9.2565e+20	1.0471e+21	1.0936e+21	1.1555e+21	1.3005e+21	1.3339e+21
1.39655	5.3074e+20	6.0734e+20	6.3691e+20	6.6731e+20	7.2129e+20	7.516e+20	7.6591e+20	8.0035e+20	8.788e+20	9.6934e+20	1.0347e+21	1.0842e+21	1.2195e+21	1.2552e+21
1.3992	4.8573e+20	5.6036e+20	5.9301e+20	6.1915e+20	6.616e+20	7.0462e+20	7.1677e+20	7.4849e+20	8.2377e+20	9.0038e+20	9.7241e+20	1.0257e+21	1.1578e+21	1.1654e+21
1.40185	4.4455e+20	5.2798e+20	5.5747e+20	5.8763e+20	6.1506e+20	6.6841e+20	6.7834e+20	7.1218e+20	7.91e+20	8.623e+20	9.2083e+20	9.9583e+20	1.1051e+21	1.1264e+21
1.4045	4.3979e+20	5.1067e+20	5.4116e+20	5.7188e+20	5.9289e+20	6.566e+20	6.7775e+20	7.017e+20	7.6391e+20	8.4288e+20	8.8963e+20	9.6258e+20	1.0627e+21	1.1045e+21
1.40715	4.5898e+20	5.2138e+20	5.4078e+20	5.7711e+20	5.8409e+20	6.5182e+20	7.0037e+20	7.1431e+20	7.6664e+20	8.487e+20	8.7175e+20	9.3293e+20	1.0341e+21	1.0802e+21
1.4098	5.203e+20	5.6182e+20	5.5484e+20	5.899e+20	6.054e+20	6.7942e+20	7.1025e+20	7.4466e+20	7.8663e+20	8.6686e+20	8.8156e+20	9.3483e+20	1.0065e+21	1.065e+21
1.41245	5.4905e+20	6.0508e+20	5.9956e+20	6.2451e+20	6.3468e+20	6.912e+20	7.2649e+20	7.5399e+20	8.0555e+20	8.7912e+20	8.9896e+20	9.3353e+20	9.9712e+20	1.0437e+21
1.4151	5.7702e+20	6.1856e+20	6.2541e+20	6.5991e+20	6.6677e+20	6.9183e+20	7.2442e+20	7.583e+20	7.9112e+20	8.4852e+20	8.8244e+20	8.9779e+20	9.6893e+20	9.9056e+20
1.41775	5.7036e+20	6.1068e+20	6.0783e+20	6.6771e+20	6.5868e+20	6.6666e+20	6.9922e+20	7.2291e+20	7.4985e+20	7.8961e+20	8.0139e+20	8.4106e+20	9.0698e+20	9.3459e+20
1.4204	5.2965e+20	5.551e+20	5.5817e+20	6.2163e+20	6.1369e+20	6.1573e+20	6.3005e+20	6.5594e+20	6.6336e+20	7.1736e+20	7.0899e+20	7.3843e+20	8.3303e+20	8.269e+20
1.42305	4.5556e+20	4.6274e+20	4.8567e+20	5.418e+20	5.3597e+20	5.3216e+20	5.424e+20	5.3271e+20	5.5992e+20	6.0789e+20	6.0524e+20	6.2268e+20	7.3676e+20	7.2166e+20
1.4257	3.6669e+20	3.661e+20	4.1211e+20	4.4097e+20	4.4935e+20	4.469e+20	4.4238e+20	4.3844e+20	4.3698e+20	5.087e+20	4.9928e+20	5.187e+20	6.2257e+20	6.0404e+20
1.42835	2.6808e+20	2.952e+20	3.2629e+20	3.4533e+20	3.6154e+20	3.562e+20	3.512e+20	3.6228e+20	3.4861e+20	3.8881e+20	4.1151e+20	4.2568e+20	5.2042e+20	5.1062e+20
1.431	1.9074e+20	2.2314e+20	2.4374e+20	2.6076e+20	2.9303e+20	2.8679e+20	2.7663e+20	2.8638e+20	2.775e+20	3.0802e+20	3.2487e+20	3.5555e+20	4.3402e+20	4.2353e+20
1.43365	1.3151e+20	1.5855e+20	1.8113e+20	1.9383e+20	2.0173e+20	2.1792e+20	2.0485e+20	2.2242e+20	2.1492e+20	2.58e+20	2.4865e+20	2.6443e+20	3.4033e+20	3.3192e+20
1.4363	6.7345e+19	1.0802e+20	1.1401e+20	1.3995e+20	1.4391e+20	1.3943e+20	1.4761e+20	1.6999e+20	1.6886e+20	1.6706e+20	1.8264e+20	2.1072e+20	2.5872e+20	2.6585e+20
1.43895	1.9682e+19	5.8532e+19	7.7235e+19	7.555e+19	9.9875e+19	6.9823e+19	9.5158e+19	1.169e+20	9.5122e+19	1.1385e+20	1.3163e+20	1.7061e+20	1.9704e+20	2.0361e+20
1.4416	-6.3156e+18	9.5961e+18	2.0678e+19	1.9376e+19	5.2837e+19	2.2592e+19	3.8357e+19	5.2031e+19	5.1113e+19	7.283e+19	6.3538e+19	1.1628e+20	1.3809e+20	1.3943e+20
1.44425	-4.5399e+19	-4.3005e+19	-3.8157e+19	-2.5238e+19	3.5336e+18	-1.271e+19	-3.0276e+18	-6.3024e+18	1.5203e+19	3.0069e+19	2.103e+19	7.4476e+19	8.4512e+19	8.5633e+19
1.4469	-7.503e+19	-7.0541e+19	-7.9346e+19	-7.2101e+19	-2.1451e+19	-4.3813e+19	-4.5494e+19	-4.4885e+19	-3.4238e+19	-1.2904e+19	-3.0437e+18	1.6761e+19	3.9907e+19	4.3654e+19
1.44955	-1.1464e+20	-1.1566e+20	-1.1472e+20	-1.0317e+20	-6.2189e+19	-6.748e+19	-7.5631e+19	-7.0453e+19	-6.3532e+19	-4.7196e+19	-3.2816e+19	-4.4679e+19	-2.4905e+18	1.0991e+18
1.4522	-1.6034e+20	-1.5088e+20	-1.4737e+20	-1.2159e+20	-1.1936e+20	-9.689e+19	-1.0069e+20	-9.5094e+19	-1.0142e+20	-7.6187e+19	-6.2855e+19	-9.062e+19	-3.9913e+19	-2.7604e+19
1.45485	-1.9418e+20	-1.8616e+20	-1.6077e+20	-1.4309e+20	-1.4269e+20	-1.4706e+20	-1.3635e+20	-1.1989e+20	-1.2763e+20	-1.146e+20	-1.0126e+20	-1.2189e+20	-8.0453e+19	-6.4693e+19
1.4575	-2.1595e+20	-2.0506e+20	-1.8812e+20	-1.7274e+20	-1.752e+20	-1.8653e+20	-1.5137e+20	-1.5774e+20	-1.5982e+20	-1.4253e+20	-1.3058e+20	-1.5647e+20	-1.1195e+20	-9.9235e+19
1.46015	-2.3668e+20	-2.301e+20	-2.1824e+20	-1.9057e+20	-2.001e+20	-2.1713e+20	-1.7561e+20	-1.8673e+20	-2.0193e+20	-1.7376e+20	-1.58e+20	-1.7076e+20	-1.4948e+20	-1.2304e+20
1.4628	-2.5275e+20	-2.4696e+20	-2.3413e+20	-2.2285e+20	-2.2342e+20	-2.3516e+20	-2.0868e+20	-2.0358e+20	-2.4672e+20	-1.9831e+20	-1.8885e+20	-1.8362e+20	-1.8414e+20	-1.4971e+20
1.46545	-2.6861e+20	-2.7016e+20	-2.5759e+20	-2.3688e+20	-2.4915e+20	-2.4936e+20	-2.4217e+20	-2.1986e+20	-2.7347e+20	-2.266e+20	-2.2163e+20	-2.1455e+20	-2.0269e+20	-1.8161e+20
1.4681	-2.9196e+20	-2.9072e+20	-2.8096e+20	-2.5882e+20	-2.5786e+20	-2.6297e+20	-2.6401e+20	-2.3881e+20	-2.8531e+20	-2.4647e+20	-2.3866e+20	-2.3983e+20	-2.2012e+20	-2.2074e+20
1.47075	-3.2211e+20	-3.0484e+20	-3.0322e+20	-2.7451e+20	-2.6744e+20	-2.7381e+20	-2.8081e+20	-2.6812e+20	-2.9449e+20	-2.7236e+20	-2.4167e+20	-2.5387e+20	-2.5763e+20	-2.5287e+20
1.4734	-3.3408e+20	-3.2162e+20	-3.141e+20	-2.9089e+20	-2.9159e+20	-2.8508e+20	-3.0134e+20	-2.8936e+20	-3.2247e+20	-2.9879e+20	-2.7518e+20	-2.8435e+20	-2.9631e+20	-2.8485e+20
1.47605	-3.395e+20	-3.3847e+20	-3.2798e+20	-3.0765e+20	-3.1738e+20	-3.1266e+20	-3.2704e+20	-3.0631e+20	-3.4701e+20	-3.2234e+20	-3.0881e+20	-3.1264e+20	-3.1436e+20	-3.0383e+20
1.4787	-3.4371e+20	-3.4696e+20	-3.4421e+20	-3.3542e+20	-3.4457e+20	-3.3645e+20	-3.4431e+20	-3.3754e+20	-3.5611e+20	-3.3954e+20	-3.2612e+20	-3.2864e+20	-3.2517e+20	-3.3038e+20
1.48135	-3.6755e+20	-3.5428e+20	-3.6404e+20	-3.7208e+20	-3.5162e+20	-3.5772e+20	-3.5329e+20	-3.6052e+20	-3.6074e+20	-3.4556e+20	-3.2954e+20	-3.5222e+20	-3.4491e+20	-3.5207e+20
1.484	-3.9523e+20	-3.6732e+20	-3.8419e+20	-3.9461e+20	-3.7646e+20	-3.7715e+20	-3.658e+20	-3.7408e+20	-3.8287e+20	-3.5872e+20	-3.559e+20	-3.5873e+20	-3.6586e+20	-3.6685e+20
1.48665	-4.1893e+20	-3.8859e+20	-3.8891e+20	-4.0766e+20	-3.9453e+20	-3.9512e+20	-3.9267e+20	-3.9976e+20	-3.9384e+20	-3.7995e+20	-3.8278e+20	-3.6551e+20	-3.7321e+20	-3.8167e+20
1.4893	-4.1865e+20	-4.0806e+20	-3.928e+20	-4.014e+20	-4.0458e+20	-4.0956e+20	-4.1328e+20	-4.099e+20	-3.866e+20	-3.9574e+20	-3.9249e+20	-3.834e+20	-3.8423e+20	-3.8997e+20
1.49195	-4.2176e+20	-4.2312e+20	-4.0959e+20	-4.0287e+20	-4.1037e+20	-4.3285e+20	-4.2206e+20	-4.3171e+20	-3.9715e+20	-4.0432e+20	-4.0263e+20	-4.018e+20	-4.0072e+20	-3.9144e+20
1.4946	-4.2503e+20	-4.244e+20	-4.244e+20	-4.2105e+20	-4.0159e+20	-4.259e+20	-4.2772e+20	-4.4059e+20	-4.1298e+20	-4.2696e+20	-4.1451e+20	-4.2116e+20	-4.1514e+20	-4.2374e+20
1.49725	-4.3487e+20	-4.1941e+20	-4.3444e+20	-4.3206e+20	-4.1545e+20	-4.2328e+20	-4.3133e+20	-4.3901e+20	-4.4226e+20	-4.2953e+20	-4.3251e+20	-4.3103e+20	-4.3468e+20	-4.6129e+20
1.4999	-4.4778e+20	-4.4226e+20	-4.4396e+20	-4.584e+20	-4.2937e+20	-4.3059e+20	-4.4868e+20	-4.377e+20	-4.5522e+20	-4.4473e+20	-4.5471e+20	-4.5006e+20	-4.42e+20	-4.6487e+20
1.50255	-4.563e+20	-4.5189e+20	-4.5198e+20	-4.5894e+20	-4.4523e+20	-4.401e+20	-4.6348e+20	-4.6178e+20	-4.6227e+20	-4.5615e+20	-4.6661e+20	-4.7209e+20	-4.5571e+20	-4.827e+20
1.5052	-4.6936e+20	-4.5658e+20	-4.5505e+20	-4.6902e+20	-4.7516e+20	-4.6706e+20	-4.7666e+20	-4.7447e+20	-4.6714e+20	-4.789e+20	-4.8284e+20	-4.8935e+20	-4.6828e+20	-4.9849e+20
1.50785	-4.6793e+20	-4.665e+20	-4.7265e+20	-4.8126e+20	-4.8925e+20	-4.7742e+20	-4.7797e+20	-4.8206e+20	-4.7449e+20	-4.8649e+20	-4.8659e+20	-4.756e+20	-4.7614e+20	-5.0079e+20
1.5105	-4.9408e+20	-4.8225e+20	-4.7616e+20	-4.86e+20	-4.935e+20	-4.8699e+20	-4.8019e+20	-5.0353e+20	-4.887e+20	-4.9679e+20	-4.8903e+20	-4.5607e+20	-4.9031e+20	-5.1764e+20
1.51315	-5.0075e+20	-4.8875e+20	-4.7622e+20	-4.8851e+20	-4.8979e+20	-4.8508e+20	-4.8683e+20	-5.1151e+20	-5.0263e+20	-4.9528e+20	-4.9705e+20	-4.5637e+20	-5.0037e+20	-5.2512e+20
1.5158	-4.8414e+20	-4.85e+20	-4.8568e+20	-4.996e+20	-4.9693e+20	-4.8356e+20	-4.803e+20	-5.1322e+20	-5.0971e+20	-5.0745e+20	-5.0465e+20	-4.6895e+20	-4.9736e+20	-5.2721e+20
1.51845	-4.9566e+20	-4.9005e+20	-4.9212e+20	-5.2075e+20	-5.0743e+20	-4.8364e+20	-4.7833e+20	-5.2854e+20	-5.011e+20	-5.1436e+20	-5.1621e+20	-4.9914e+20	-5.0903e+20	-5.257e+20
1.5211	-5.0715e+20	-5.0451e+20	-4.9224e+20	-5.3635e+20	-5.2018e+20	-4.8663e+20	-4.8805e+20	-5.3051e+20	-5.0554e+20	-5.234e+20	-5.2093e+20	-5.203e+20	-5.1636e+20	-5.3029e+20
1.52375	-5.1012e+20	-5.1838e+20	-4.9436e+20	-5.2256e+20	-5.2005e+20	-5.135e+20	-4.9756e+20	-5.3183e+20	-5.1871e+20	-5.2645e+20	-5.2879e+20	-5.3252e+20	-5.2682e+20	-5.4576e+20
1.5264	-5.1141e+20	-5.2475e+20	-5.0711e+20	-5.3857e+20	-5.1712e+20	-5.244e+20	-5.1533e+20	-5.3259e+20	-5.2675e+20	-5.1701e+20	-5.3177e+20	-5.3387e+20	-5.4138e+20	-5.4861e+20
1.52905	-5.1483e+20	-5.2006e+20	-5.0303e+20	-5.4416e+20	-5.2762e+20	-5.0651e+20	-5.1884e+20	-5.2715e+20	-5.2161e+20	-5.099e+20	-5.3078e+20	-5.3587e+20	-5.5486e+20	-5.4896e+20

## Sheet: Figure 4d
Figure 4d	Evolution of 6Li content during cycling at the center of the cell (positive electrode charge)
	6Li atomic density (at/cm3) at different SoC (%)
Distance (mm)	0	10	20	30	40	50	60	70	80	90	92.5	95	97.5	100
0	1.2341e+21	1.2478e+21	1.2894e+21	1.2632e+21	1.2576e+21	1.2541e+21	1.2229e+21	1.2572e+21	1.2176e+21	1.2157e+21	1.2164e+21	1.1925e+21	1.2459e+21	1.2191e+21
0.00265	1.2613e+21	1.2779e+21	1.3025e+21	1.3061e+21	1.3033e+21	1.2924e+21	1.2501e+21	1.2758e+21	1.2372e+21	1.2258e+21	1.2269e+21	1.2118e+21	1.2826e+21	1.2362e+21
0.0053	1.2815e+21	1.3178e+21	1.3227e+21	1.3348e+21	1.326e+21	1.3198e+21	1.2642e+21	1.302e+21	1.2664e+21	1.2784e+21	1.282e+21	1.2458e+21	1.3236e+21	1.2694e+21
0.00795	1.3045e+21	1.3431e+21	1.3643e+21	1.3721e+21	1.3587e+21	1.343e+21	1.2926e+21	1.3188e+21	1.3181e+21	1.3226e+21	1.3295e+21	1.2792e+21	1.3581e+21	1.3012e+21
0.0106	1.3236e+21	1.3694e+21	1.3758e+21	1.4075e+21	1.4057e+21	1.3887e+21	1.345e+21	1.3469e+21	1.3622e+21	1.3584e+21	1.3786e+21	1.3097e+21	1.4057e+21	1.3389e+21
0.01325	1.3661e+21	1.4152e+21	1.4114e+21	1.4223e+21	1.4505e+21	1.4421e+21	1.4111e+21	1.4067e+21	1.3927e+21	1.3863e+21	1.4148e+21	1.3651e+21	1.4413e+21	1.3837e+21
0.0159	1.4189e+21	1.4507e+21	1.4518e+21	1.458e+21	1.4668e+21	1.4762e+21	1.4511e+21	1.4533e+21	1.4286e+21	1.4257e+21	1.4567e+21	1.42e+21	1.4723e+21	1.4332e+21
0.01855	1.4596e+21	1.4998e+21	1.515e+21	1.5032e+21	1.4871e+21	1.5268e+21	1.4808e+21	1.5067e+21	1.4814e+21	1.4785e+21	1.4776e+21	1.4803e+21	1.5098e+21	1.4836e+21
0.0212	1.5079e+21	1.5511e+21	1.5512e+21	1.5591e+21	1.5462e+21	1.5822e+21	1.5315e+21	1.5723e+21	1.542e+21	1.5228e+21	1.5221e+21	1.5257e+21	1.5346e+21	1.52e+21
0.02385	1.5525e+21	1.5861e+21	1.6043e+21	1.6103e+21	1.5762e+21	1.6149e+21	1.5736e+21	1.6e+21	1.583e+21	1.5804e+21	1.564e+21	1.5736e+21	1.5735e+21	1.5665e+21
0.0265	1.5837e+21	1.6219e+21	1.6775e+21	1.6492e+21	1.6354e+21	1.6309e+21	1.6137e+21	1.6169e+21	1.6078e+21	1.6491e+21	1.5931e+21	1.6247e+21	1.6297e+21	1.636e+21
0.02915	1.6202e+21	1.6778e+21	1.7392e+21	1.6818e+21	1.6839e+21	1.6902e+21	1.6663e+21	1.6718e+21	1.6411e+21	1.7113e+21	1.6527e+21	1.6805e+21	1.6974e+21	1.7185e+21
0.0318	1.6875e+21	1.7487e+21	1.7795e+21	1.7449e+21	1.7187e+21	1.7694e+21	1.728e+21	1.7433e+21	1.7003e+21	1.7746e+21	1.7282e+21	1.7381e+21	1.7544e+21	1.774e+21
0.03445	1.7446e+21	1.7875e+21	1.8251e+21	1.8075e+21	1.786e+21	1.8478e+21	1.8115e+21	1.7946e+21	1.7591e+21	1.817e+21	1.8076e+21	1.8003e+21	1.7981e+21	1.832e+21
0.0371	1.7889e+21	1.8315e+21	1.8593e+21	1.8575e+21	1.8464e+21	1.8945e+21	1.8703e+21	1.8406e+21	1.8236e+21	1.8705e+21	1.8755e+21	1.8654e+21	1.8515e+21	1.899e+21
0.03975	1.8353e+21	1.8989e+21	1.9249e+21	1.9189e+21	1.9107e+21	1.9588e+21	1.9316e+21	1.9075e+21	1.9091e+21	1.9196e+21	1.9217e+21	1.9235e+21	1.9029e+21	1.9665e+21
0.0424	1.8913e+21	1.9412e+21	1.978e+21	1.9771e+21	1.949e+21	2.0404e+21	1.9955e+21	1.9638e+21	1.9739e+21	1.9675e+21	1.9674e+21	1.9761e+21	1.9829e+21	2.012e+21
0.04505	1.9417e+21	1.9737e+21	2.0318e+21	2.0229e+21	2.0032e+21	2.0875e+21	2.045e+21	2.0021e+21	2.0668e+21	2.0164e+21	2.021e+21	2.0597e+21	2.071e+21	2.0844e+21
0.0477	1.9756e+21	2.0361e+21	2.0889e+21	2.069e+21	2.0497e+21	2.154e+21	2.1062e+21	2.0717e+21	2.1175e+21	2.0736e+21	2.0967e+21	2.1195e+21	2.1248e+21	2.1849e+21
0.05035	2.0158e+21	2.0741e+21	2.1476e+21	2.124e+21	2.1128e+21	2.2087e+21	2.1645e+21	2.148e+21	2.1353e+21	2.1643e+21	2.1747e+21	2.1982e+21	2.2151e+21	2.2462e+21
0.053	2.081e+21	2.1122e+21	2.1999e+21	2.2161e+21	2.1974e+21	2.2707e+21	2.2254e+21	2.226e+21	2.1929e+21	2.2455e+21	2.2584e+21	2.2733e+21	2.2858e+21	2.3096e+21
0.05565	2.1744e+21	2.1862e+21	2.267e+21	2.3124e+21	2.2886e+21	2.3466e+21	2.2982e+21	2.3022e+21	2.2853e+21	2.3177e+21	2.336e+21	2.3327e+21	2.3642e+21	2.3788e+21
0.0583	2.2381e+21	2.286e+21	2.3329e+21	2.394e+21	2.3788e+21	2.4243e+21	2.3829e+21	2.3943e+21	2.4017e+21	2.4025e+21	2.413e+21	2.4132e+21	2.4523e+21	2.4329e+21
0.06095	2.2896e+21	2.359e+21	2.405e+21	2.4491e+21	2.4583e+21	2.4919e+21	2.4653e+21	2.4757e+21	2.4602e+21	2.4597e+21	2.491e+21	2.5071e+21	2.5374e+21	2.5327e+21
0.0636	2.3546e+21	2.4183e+21	2.4788e+21	2.5134e+21	2.5264e+21	2.5534e+21	2.5135e+21	2.5495e+21	2.5577e+21	2.5097e+21	2.596e+21	2.6006e+21	2.6381e+21	2.64e+21
0.06625	2.4243e+21	2.4848e+21	2.6013e+21	2.6011e+21	2.6027e+21	2.6372e+21	2.625e+21	2.6286e+21	2.6479e+21	2.6079e+21	2.6746e+21	2.6856e+21	2.7313e+21	2.7433e+21
0.0689	2.501e+21	2.5821e+21	2.6791e+21	2.6643e+21	2.6971e+21	2.738e+21	2.7357e+21	2.7161e+21	2.753e+21	2.7548e+21	2.7835e+21	2.794e+21	2.8447e+21	2.8602e+21
0.07155	2.5845e+21	2.6826e+21	2.7787e+21	2.764e+21	2.8139e+21	2.8324e+21	2.8504e+21	2.8099e+21	2.8781e+21	2.8828e+21	2.9078e+21	2.8917e+21	2.962e+21	2.9656e+21
0.0742	2.6769e+21	2.8089e+21	2.8659e+21	2.8854e+21	2.9018e+21	2.94e+21	2.96e+21	2.9323e+21	3.0012e+21	3.0132e+21	3.0559e+21	3.0328e+21	3.1053e+21	3.1244e+21
0.07685	2.8041e+21	2.8835e+21	3.0097e+21	3.0165e+21	3.0411e+21	3.0763e+21	3.0634e+21	3.079e+21	3.1579e+21	3.1798e+21	3.2246e+21	3.2041e+21	3.2462e+21	3.2804e+21
0.0795	2.9236e+21	3.0036e+21	3.1646e+21	3.1664e+21	3.2058e+21	3.215e+21	3.2236e+21	3.2416e+21	3.2731e+21	3.3494e+21	3.3614e+21	3.3587e+21	3.4433e+21	3.4854e+21
0.08215	3.032e+21	3.1171e+21	3.276e+21	3.3162e+21	3.3656e+21	3.3772e+21	3.4346e+21	3.4019e+21	3.4299e+21	3.4933e+21	3.523e+21	3.5268e+21	3.6356e+21	3.6724e+21
0.0848	3.1694e+21	3.2858e+21	3.3934e+21	3.4758e+21	3.5765e+21	3.5385e+21	3.6159e+21	3.5822e+21	3.6486e+21	3.6846e+21	3.7206e+21	3.7243e+21	3.8417e+21	3.9208e+21
0.08745	3.3197e+21	3.4479e+21	3.5616e+21	3.6328e+21	3.7764e+21	3.7533e+21	3.8041e+21	3.8201e+21	3.8847e+21	3.9364e+21	3.987e+21	3.9903e+21	4.1274e+21	4.2006e+21
0.0901	3.4419e+21	3.6307e+21	3.7853e+21	3.8617e+21	3.972e+21	4.0126e+21	4.0848e+21	4.0812e+21	4.1479e+21	4.2022e+21	4.2816e+21	4.2872e+21	4.4181e+21	4.4773e+21
0.09275	3.6666e+21	3.8499e+21	4.0124e+21	4.0996e+21	4.2347e+21	4.2898e+21	4.3325e+21	4.3305e+21	4.4418e+21	4.4855e+21	4.5965e+21	4.5568e+21	4.6681e+21	4.7636e+21
0.0954	3.8923e+21	4.0715e+21	4.2923e+21	4.3879e+21	4.5401e+21	4.6029e+21	4.6073e+21	4.6582e+21	4.7186e+21	4.7806e+21	4.8619e+21	4.8578e+21	4.9065e+21	5.0169e+21
0.09805	4.1729e+21	4.3228e+21	4.5641e+21	4.7251e+21	4.8029e+21	4.8708e+21	4.8839e+21	4.9552e+21	5.004e+21	5.1115e+21	5.1443e+21	5.1849e+21	5.2374e+21	5.2622e+21
0.1007	4.4072e+21	4.6001e+21	4.8791e+21	4.969e+21	5.1073e+21	5.1358e+21	5.133e+21	5.2154e+21	5.3269e+21	5.3784e+21	5.401e+21	5.43e+21	5.5346e+21	5.5429e+21
0.10335	4.7074e+21	4.8746e+21	5.1226e+21	5.202e+21	5.3693e+21	5.4096e+21	5.408e+21	5.4522e+21	5.5466e+21	5.6028e+21	5.6548e+21	5.6833e+21	5.7744e+21	5.7952e+21
0.106	5.0064e+21	5.1322e+21	5.3428e+21	5.4994e+21	5.623e+21	5.7006e+21	5.6225e+21	5.7066e+21	5.7802e+21	5.8455e+21	5.8778e+21	5.8816e+21	6.0075e+21	6.0391e+21
0.10865	5.282e+21	5.3906e+21	5.581e+21	5.7261e+21	5.8352e+21	5.8847e+21	5.8561e+21	5.9374e+21	5.9959e+21	6.0215e+21	6.0838e+21	6.0786e+21	6.2299e+21	6.2103e+21
0.1113	5.5127e+21	5.6084e+21	5.8202e+21	5.9569e+21	6.048e+21	6.1055e+21	6.0355e+21	6.1552e+21	6.2076e+21	6.2221e+21	6.2697e+21	6.2924e+21	6.3903e+21	6.3534e+21
0.11395	5.7387e+21	5.8712e+21	6.0702e+21	6.1826e+21	6.2417e+21	6.2801e+21	6.2524e+21	6.3348e+21	6.3959e+21	6.4491e+21	6.4476e+21	6.4356e+21	6.5645e+21	6.5326e+21
0.1166	5.9567e+21	6.0704e+21	6.2837e+21	6.3997e+21	6.4133e+21	6.4057e+21	6.4466e+21	6.468e+21	6.5501e+21	6.6007e+21	6.6064e+21	6.6146e+21	6.7069e+21	6.6898e+21
0.11925	6.1817e+21	6.2747e+21	6.4539e+21	6.5702e+21	6.5974e+21	6.5579e+21	6.6169e+21	6.5747e+21	6.7272e+21	6.8123e+21	6.7341e+21	6.7638e+21	6.8961e+21	6.8648e+21
0.1219	6.3763e+21	6.4833e+21	6.6092e+21	6.7535e+21	6.7594e+21	6.7416e+21	6.7934e+21	6.717e+21	6.8871e+21	6.9597e+21	6.8829e+21	6.8978e+21	7.0502e+21	6.9628e+21
0.12455	6.5361e+21	6.6523e+21	6.7636e+21	6.8955e+21	6.9056e+21	6.9198e+21	6.9675e+21	6.9074e+21	7.0191e+21	7.0189e+21	7.0209e+21	7.0382e+21	7.1404e+21	7.0744e+21
0.1272	6.6572e+21	6.7861e+21	6.8931e+21	6.9936e+21	7.039e+21	7.0558e+21	7.0667e+21	6.9897e+21	7.0907e+21	7.1265e+21	7.1024e+21	7.1402e+21	7.1841e+21	7.2006e+21
0.12985	6.787e+21	6.8922e+21	6.9944e+21	7.0929e+21	7.1183e+21	7.1359e+21	7.1181e+21	7.0719e+21	7.1353e+21	7.2245e+21	7.1826e+21	7.2092e+21	7.2587e+21	7.317e+21
0.1325	6.902e+21	7.0006e+21	7.1191e+21	7.2338e+21	7.2327e+21	7.2589e+21	7.2236e+21	7.1805e+21	7.1804e+21	7.2816e+21	7.2751e+21	7.3386e+21	7.3952e+21	7.3953e+21
0.13515	7.0237e+21	7.1106e+21	7.2093e+21	7.3277e+21	7.3207e+21	7.3468e+21	7.3257e+21	7.2855e+21	7.2236e+21	7.335e+21	7.4014e+21	7.4451e+21	7.4687e+21	7.4383e+21
0.1378	7.1562e+21	7.2101e+21	7.2614e+21	7.3855e+21	7.3935e+21	7.3903e+21	7.4e+21	7.3718e+21	7.3552e+21	7.461e+21	7.4889e+21	7.4908e+21	7.4947e+21	7.4747e+21
0.14045	7.2572e+21	7.3008e+21	7.3323e+21	7.4594e+21	7.4573e+21	7.4283e+21	7.4672e+21	7.4506e+21	7.4516e+21	7.5413e+21	7.4993e+21	7.4953e+21	7.5403e+21	7.5488e+21
0.1431	7.3206e+21	7.3256e+21	7.4072e+21	7.5221e+21	7.4708e+21	7.4706e+21	7.5173e+21	7.4617e+21	7.4771e+21	7.575e+21	7.5325e+21	7.5092e+21	7.6006e+21	7.6352e+21
0.14575	7.3626e+21	7.3382e+21	7.4802e+21	7.5545e+21	7.5347e+21	7.5307e+21	7.6074e+21	7.5263e+21	7.5551e+21	7.6435e+21	7.5924e+21	7.5852e+21	7.6124e+21	7.6782e+21
0.1484	7.4454e+21	7.3856e+21	7.56e+21	7.6193e+21	7.5878e+21	7.6456e+21	7.6671e+21	7.596e+21	7.6246e+21	7.7115e+21	7.62e+21	7.5947e+21	7.6076e+21	7.7059e+21
0.15105	7.5059e+21	7.4244e+21	7.6326e+21	7.6517e+21	7.6229e+21	7.702e+21	7.6862e+21	7.6632e+21	7.6527e+21	7.7061e+21	7.6047e+21	7.6157e+21	7.6511e+21	7.7061e+21
0.1537	7.5307e+21	7.4605e+21	7.625e+21	7.7014e+21	7.6436e+21	7.7436e+21	7.6795e+21	7.672e+21	7.6448e+21	7.699e+21	7.593e+21	7.5924e+21	7.6925e+21	7.7147e+21
0.15635	7.5346e+21	7.5481e+21	7.6331e+21	7.7239e+21	7.6754e+21	7.7062e+21	7.7026e+21	7.6406e+21	7.6314e+21	7.6797e+21	7.5847e+21	7.5403e+21	7.7112e+21	7.7482e+21
0.159	7.5236e+21	7.599e+21	7.6959e+21	7.6866e+21	7.6518e+21	7.7093e+21	7.6861e+21	7.6458e+21	7.6289e+21	7.6993e+21	7.637e+21	7.5965e+21	7.6549e+21	7.7317e+21
0.16165	7.5758e+21	7.6362e+21	7.6957e+21	7.6706e+21	7.6495e+21	7.7032e+21	7.6917e+21	7.6939e+21	7.6489e+21	7.746e+21	7.7003e+21	7.6511e+21	7.6814e+21	7.7149e+21
0.1643	7.6028e+21	7.6186e+21	7.7013e+21	7.6884e+21	7.6808e+21	7.6894e+21	7.7501e+21	7.6812e+21	7.7181e+21	7.7176e+21	7.6781e+21	7.6788e+21	7.6976e+21	7.6874e+21
0.16695	7.6724e+21	7.6358e+21	7.702e+21	7.6987e+21	7.7193e+21	7.7015e+21	7.7511e+21	7.6943e+21	7.7307e+21	7.715e+21	7.7185e+21	7.706e+21	7.7446e+21	7.7076e+21
0.1696	7.727e+21	7.6866e+21	7.687e+21	7.712e+21	7.7453e+21	7.7184e+21	7.7622e+21	7.6861e+21	7.7368e+21	7.7379e+21	7.7565e+21	7.7572e+21	7.7661e+21	7.7566e+21
0.17225	7.7361e+21	7.6814e+21	7.7314e+21	7.7496e+21	7.7451e+21	7.7531e+21	7.7881e+21	7.7255e+21	7.7541e+21	7.7968e+21	7.7958e+21	7.8497e+21	7.8307e+21	7.8116e+21
0.1749	7.7521e+21	7.733e+21	7.7895e+21	7.7934e+21	7.7694e+21	7.8154e+21	7.845e+21	7.7678e+21	7.8082e+21	7.832e+21	7.8248e+21	7.8805e+21	7.8377e+21	7.8114e+21
0.17755	7.7235e+21	7.8343e+21	7.8603e+21	7.8246e+21	7.8056e+21	7.8644e+21	7.8851e+21	7.7951e+21	7.8328e+21	7.7955e+21	7.8021e+21	7.8527e+21	7.7982e+21	7.8078e+21
0.1802	7.7467e+21	7.8123e+21	7.8544e+21	7.8199e+21	7.7962e+21	7.8999e+21	7.8368e+21	7.8257e+21	7.838e+21	7.8394e+21	7.7827e+21	7.8086e+21	7.7716e+21	7.8013e+21
0.18285	7.729e+21	7.8022e+21	7.8675e+21	7.8248e+21	7.7726e+21	7.881e+21	7.8136e+21	7.8733e+21	7.768e+21	7.8805e+21	7.7793e+21	7.7886e+21	7.7715e+21	7.7541e+21
0.1855	7.739e+21	7.72e+21	7.9019e+21	7.8191e+21	7.7564e+21	7.8549e+21	7.7612e+21	7.8747e+21	7.7219e+21	7.8369e+21	7.7713e+21	7.7991e+21	7.755e+21	7.686e+21
0.18815	7.7645e+21	7.7028e+21	7.8699e+21	7.7757e+21	7.7186e+21	7.8263e+21	7.7361e+21	7.8636e+21	7.7151e+21	7.7884e+21	7.7181e+21	7.8176e+21	7.7461e+21	7.7222e+21
0.1908	7.7422e+21	7.7055e+21	7.8226e+21	7.7511e+21	7.726e+21	7.845e+21	7.6662e+21	7.8698e+21	7.7479e+21	7.7283e+21	7.6773e+21	7.8078e+21	7.7196e+21	7.7701e+21
0.19345	7.7225e+21	7.7447e+21	7.7964e+21	7.782e+21	7.7118e+21	7.8066e+21	7.6527e+21	7.8284e+21	7.7422e+21	7.7221e+21	7.6526e+21	7.7445e+21	7.7533e+21	7.7083e+21
0.1961	7.7536e+21	7.7604e+21	7.8115e+21	7.7592e+21	7.7174e+21	7.8023e+21	7.7162e+21	7.7877e+21	7.7413e+21	7.7332e+21	7.6618e+21	7.7375e+21	7.7581e+21	7.728e+21
0.19875	7.7245e+21	7.7646e+21	7.8294e+21	7.8144e+21	7.7307e+21	7.8037e+21	7.7256e+21	7.827e+21	7.7266e+21	7.7716e+21	7.7081e+21	7.7409e+21	7.7409e+21	7.738e+21
0.2014	7.7479e+21	7.767e+21	7.8346e+21	7.7957e+21	7.7737e+21	7.8029e+21	7.7192e+21	7.8424e+21	7.6754e+21	7.7694e+21	7.7438e+21	7.8109e+21	7.7025e+21	7.6953e+21
0.20405	7.7921e+21	7.7811e+21	7.8243e+21	7.7805e+21	7.7948e+21	7.8412e+21	7.718e+21	7.8416e+21	7.682e+21	7.7179e+21	7.7972e+21	7.8081e+21	7.7127e+21	7.6674e+21
0.2067	7.7584e+21	7.7212e+21	7.8142e+21	7.7603e+21	7.7838e+21	7.8415e+21	7.733e+21	7.8157e+21	7.6824e+21	7.7383e+21	7.7705e+21	7.8401e+21	7.7717e+21	7.7179e+21
0.20935	7.7314e+21	7.712e+21	7.843e+21	7.7445e+21	7.7883e+21	7.8331e+21	7.7401e+21	7.8144e+21	7.6722e+21	7.7837e+21	7.7635e+21	7.8632e+21	7.8466e+21	7.7749e+21
0.212	7.7554e+21	7.7166e+21	7.8279e+21	7.7878e+21	7.804e+21	7.872e+21	7.7299e+21	7.8383e+21	7.704e+21	7.8499e+21	7.8033e+21	7.8838e+21	7.8148e+21	7.807e+21
0.21465	7.7618e+21	7.7743e+21	7.8491e+21	7.8375e+21	7.8193e+21	7.8676e+21	7.7186e+21	7.8294e+21	7.7644e+21	7.8427e+21	7.7791e+21	7.826e+21	7.7539e+21	7.8376e+21
0.2173	7.7797e+21	7.7643e+21	7.9122e+21	7.8543e+21	7.8178e+21	7.8341e+21	7.7477e+21	7.8637e+21	7.7708e+21	7.8418e+21	7.7692e+21	7.769e+21	7.7626e+21	7.8273e+21
0.21995	7.8099e+21	7.7722e+21	7.8972e+21	7.8463e+21	7.7812e+21	7.821e+21	7.7841e+21	7.8381e+21	7.7249e+21	7.8721e+21	7.745e+21	7.7557e+21	7.7799e+21	7.7785e+21
0.2226	7.7975e+21	7.7856e+21	7.8643e+21	7.8127e+21	7.7379e+21	7.8304e+21	7.7933e+21	7.8136e+21	7.6887e+21	7.8102e+21	7.7591e+21	7.7809e+21	7.7288e+21	7.7627e+21
0.22525	7.8411e+21	7.7921e+21	7.8565e+21	7.7849e+21	7.7231e+21	7.8052e+21	7.7795e+21	7.7877e+21	7.6904e+21	7.7843e+21	7.7513e+21	7.7474e+21	7.7095e+21	7.7658e+21
0.2279	7.8903e+21	7.758e+21	7.8589e+21	7.7688e+21	7.7747e+21	7.8258e+21	7.7178e+21	7.7619e+21	7.6994e+21	7.8159e+21	7.7456e+21	7.7402e+21	7.7038e+21	7.7685e+21
0.23055	7.9016e+21	7.7853e+21	7.839e+21	7.7855e+21	7.8345e+21	7.8636e+21	7.7807e+21	7.7777e+21	7.6753e+21	7.8173e+21	7.7758e+21	7.7222e+21	7.749e+21	7.7478e+21
0.2332	7.9099e+21	7.8118e+21	7.8314e+21	7.8455e+21	7.8384e+21	7.8897e+21	7.7965e+21	7.8065e+21	7.67e+21	7.8122e+21	7.7917e+21	7.6856e+21	7.73e+21	7.7042e+21
0.23585	7.8647e+21	7.8922e+21	7.8478e+21	7.8721e+21	7.8596e+21	7.8674e+21	7.7695e+21	7.7798e+21	7.6835e+21	7.787e+21	7.7362e+21	7.6706e+21	7.7165e+21	7.6816e+21
0.2385	7.7978e+21	7.8633e+21	7.786e+21	7.8543e+21	7.7767e+21	7.8445e+21	7.7517e+21	7.7458e+21	7.6998e+21	7.7583e+21	7.7215e+21	7.6489e+21	7.7302e+21	7.6709e+21
0.24115	7.7662e+21	7.8045e+21	7.6936e+21	7.8333e+21	7.7105e+21	7.8298e+21	7.7513e+21	7.7181e+21	7.7041e+21	7.8034e+21	7.7346e+21	7.7014e+21	7.7501e+21	7.717e+21
0.2438	7.7493e+21	7.7719e+21	7.6627e+21	7.8323e+21	7.6446e+21	7.804e+21	7.7228e+21	7.7239e+21	7.7311e+21	7.835e+21	7.7227e+21	7.6872e+21	7.7498e+21	7.7495e+21
0.24645	7.7704e+21	7.7848e+21	7.6578e+21	7.8222e+21	7.6314e+21	7.7895e+21	7.6966e+21	7.7157e+21	7.7668e+21	7.8296e+21	7.74e+21	7.659e+21	7.8057e+21	7.7516e+21
0.2491	7.8095e+21	7.7733e+21	7.729e+21	7.7782e+21	7.6797e+21	7.8183e+21	7.7156e+21	7.7285e+21	7.7787e+21	7.8714e+21	7.7555e+21	7.7088e+21	7.8871e+21	7.7869e+21
0.25175	7.8497e+21	7.7967e+21	7.8144e+21	7.7891e+21	7.7521e+21	7.8512e+21	7.7342e+21	7.7647e+21	7.7675e+21	7.8408e+21	7.7552e+21	7.7399e+21	7.8352e+21	7.7803e+21
0.2544	7.8458e+21	7.8312e+21	7.8239e+21	7.8581e+21	7.8201e+21	7.8523e+21	7.7342e+21	7.7858e+21	7.8127e+21	7.7949e+21	7.74e+21	7.7417e+21	7.7772e+21	7.7755e+21
0.25705	7.8359e+21	7.8271e+21	7.8024e+21	7.8416e+21	7.8052e+21	7.8309e+21	7.7518e+21	7.7579e+21	7.866e+21	7.756e+21	7.7517e+21	7.704e+21	7.7887e+21	7.7366e+21
0.2597	7.8151e+21	7.7721e+21	7.8075e+21	7.8555e+21	7.7803e+21	7.8172e+21	7.7297e+21	7.782e+21	7.862e+21	7.7761e+21	7.7593e+21	7.7329e+21	7.8491e+21	7.7321e+21
0.26235	7.8056e+21	7.7841e+21	7.8259e+21	7.8823e+21	7.773e+21	7.8192e+21	7.7879e+21	7.7931e+21	7.8579e+21	7.7894e+21	7.7659e+21	7.7818e+21	7.7894e+21	7.734e+21
0.265	7.8268e+21	7.8323e+21	7.8444e+21	7.8573e+21	7.7609e+21	7.8806e+21	7.8125e+21	7.7961e+21	7.8442e+21	7.7964e+21	7.7788e+21	7.7971e+21	7.7097e+21	7.7431e+21
0.26765	7.8629e+21	7.9067e+21	7.8463e+21	7.8351e+21	7.7792e+21	7.9178e+21	7.7987e+21	7.8094e+21	7.79e+21	7.7725e+21	7.7663e+21	7.7717e+21	7.7222e+21	7.7675e+21
0.2703	7.8342e+21	7.8861e+21	7.8486e+21	7.8384e+21	7.783e+21	7.8989e+21	7.7607e+21	7.8223e+21	7.7724e+21	7.7887e+21	7.8091e+21	7.7714e+21	7.8051e+21	7.8095e+21
0.27295	7.8117e+21	7.8572e+21	7.8949e+21	7.867e+21	7.7537e+21	7.8977e+21	7.7771e+21	7.8243e+21	7.8138e+21	7.8213e+21	7.8319e+21	7.7923e+21	7.7819e+21	7.8195e+21
0.2756	7.819e+21	7.8856e+21	7.9053e+21	7.8649e+21	7.7814e+21	7.8904e+21	7.8125e+21	7.8666e+21	7.8347e+21	7.8421e+21	7.8088e+21	7.8252e+21	7.7471e+21	7.8222e+21
0.27825	7.8611e+21	7.859e+21	7.8587e+21	7.8725e+21	7.7786e+21	7.8387e+21	7.7957e+21	7.85e+21	7.8104e+21	7.8337e+21	7.8454e+21	7.8579e+21	7.7712e+21	7.7465e+21
0.2809	7.8794e+21	7.8551e+21	7.8097e+21	7.8553e+21	7.8023e+21	7.8256e+21	7.775e+21	7.8736e+21	7.7586e+21	7.8362e+21	7.806e+21	7.7971e+21	7.7911e+21	7.7197e+21
0.28355	7.8454e+21	7.843e+21	7.7678e+21	7.8291e+21	7.7806e+21	7.8574e+21	7.7543e+21	7.8514e+21	7.7498e+21	7.795e+21	7.7447e+21	7.7825e+21	7.7663e+21	7.7381e+21
0.2862	7.7968e+21	7.8134e+21	7.7376e+21	7.8142e+21	7.7681e+21	7.8772e+21	7.7752e+21	7.8269e+21	7.7694e+21	7.7599e+21	7.7484e+21	7.7845e+21	7.705e+21	7.7518e+21
0.28885	7.8095e+21	7.8204e+21	7.7663e+21	7.7912e+21	7.7777e+21	7.8434e+21	7.8059e+21	7.8198e+21	7.7867e+21	7.7423e+21	7.8106e+21	7.79e+21	7.6886e+21	7.7743e+21
0.2915	7.8187e+21	7.8104e+21	7.8012e+21	7.803e+21	7.8002e+21	7.7969e+21	7.7743e+21	7.8156e+21	7.8149e+21	7.7624e+21	7.8416e+21	7.8038e+21	7.6706e+21	7.7756e+21
0.29415	7.7844e+21	7.8171e+21	7.8138e+21	7.8104e+21	7.8463e+21	7.7781e+21	7.7793e+21	7.7543e+21	7.8145e+21	7.7489e+21	7.7906e+21	7.8247e+21	7.7108e+21	7.7607e+21
0.2968	7.7465e+21	7.8075e+21	7.8152e+21	7.8361e+21	7.8045e+21	7.7192e+21	7.7134e+21	7.8044e+21	7.7599e+21	7.8046e+21	7.7846e+21	7.8346e+21	7.8123e+21	7.7598e+21
0.29945	7.7497e+21	7.7993e+21	7.8443e+21	7.8283e+21	7.779e+21	7.7078e+21	7.7101e+21	7.8372e+21	7.7215e+21	7.8701e+21	7.8817e+21	7.8383e+21	7.8733e+21	7.8128e+21
0.3021	7.8316e+21	7.8147e+21	7.8519e+21	7.8139e+21	7.8189e+21	7.7665e+21	7.78e+21	7.817e+21	7.7184e+21	7.9069e+21	7.9004e+21	7.8668e+21	7.8573e+21	7.8655e+21
0.30475	7.8645e+21	7.8277e+21	7.8235e+21	7.8236e+21	7.8969e+21	7.786e+21	7.8682e+21	7.8037e+21	7.7426e+21	7.8822e+21	7.8228e+21	7.8561e+21	7.8679e+21	7.8186e+21
0.3074	7.874e+21	7.8065e+21	7.8315e+21	7.8342e+21	7.8873e+21	7.7622e+21	7.874e+21	7.7691e+21	7.7555e+21	7.8423e+21	7.7916e+21	7.8246e+21	7.8543e+21	7.7811e+21
0.31005	7.863e+21	7.7956e+21	7.7989e+21	7.823e+21	7.8367e+21	7.7228e+21	7.7889e+21	7.7736e+21	7.7798e+21	7.8356e+21	7.8022e+21	7.7797e+21	7.8403e+21	7.75e+21
0.3127	7.8155e+21	7.7856e+21	7.7889e+21	7.7863e+21	7.8394e+21	7.718e+21	7.7732e+21	7.7485e+21	7.7727e+21	7.8273e+21	7.7653e+21	7.7824e+21	7.7951e+21	7.7563e+21
0.31535	7.7611e+21	7.7449e+21	7.725e+21	7.7345e+21	7.8156e+21	7.7449e+21	7.7646e+21	7.7327e+21	7.7499e+21	7.7911e+21	7.7459e+21	7.7597e+21	7.7818e+21	7.7098e+21
0.318	7.7318e+21	7.6648e+21	7.6641e+21	7.6785e+21	7.7002e+21	7.7372e+21	7.7515e+21	7.6985e+21	7.6615e+21	7.735e+21	7.7003e+21	7.7187e+21	7.7527e+21	7.6626e+21
0.32065	7.6772e+21	7.602e+21	7.5824e+21	7.6102e+21	7.5938e+21	7.6902e+21	7.668e+21	7.5791e+21	7.5828e+21	7.6542e+21	7.6834e+21	7.664e+21	7.7481e+21	7.6396e+21
0.3233	7.559e+21	7.5387e+21	7.5277e+21	7.549e+21	7.5258e+21	7.596e+21	7.6142e+21	7.5456e+21	7.6043e+21	7.6086e+21	7.649e+21	7.6668e+21	7.7379e+21	7.616e+21
0.32595	7.5027e+21	7.5062e+21	7.5056e+21	7.5321e+21	7.5068e+21	7.5471e+21	7.5597e+21	7.5664e+21	7.6245e+21	7.5791e+21	7.6337e+21	7.625e+21	7.6764e+21	7.5239e+21
0.3286	7.479e+21	7.4648e+21	7.5256e+21	7.4859e+21	7.4394e+21	7.5332e+21	7.5236e+21	7.5306e+21	7.6082e+21	7.5405e+21	7.5452e+21	7.5685e+21	7.6467e+21	7.435e+21
0.33125	7.3868e+21	7.3962e+21	7.4163e+21	7.4236e+21	7.3872e+21	7.4832e+21	7.4552e+21	7.4565e+21	7.5424e+21	7.4936e+21	7.4835e+21	7.5273e+21	7.6515e+21	7.3674e+21
0.3339	7.2626e+21	7.285e+21	7.3211e+21	7.319e+21	7.3139e+21	7.4049e+21	7.3313e+21	7.397e+21	7.5051e+21	7.4325e+21	7.3758e+21	7.4383e+21	7.548e+21	7.3491e+21
0.33655	7.2125e+21	7.1789e+21	7.2263e+21	7.2286e+21	7.2346e+21	7.3602e+21	7.2715e+21	7.296e+21	7.4476e+21	7.3298e+21	7.3024e+21	7.3546e+21	7.4608e+21	7.3529e+21
0.3392	7.0995e+21	7.0832e+21	7.1357e+21	7.1013e+21	7.1652e+21	7.2204e+21	7.2359e+21	7.2098e+21	7.3272e+21	7.2364e+21	7.2703e+21	7.29e+21	7.3576e+21	7.2876e+21
0.34185	7.0057e+21	6.9753e+21	7.0002e+21	6.997e+21	7.0725e+21	7.0853e+21	7.1323e+21	7.0932e+21	7.2078e+21	7.1731e+21	7.2395e+21	7.2719e+21	7.2258e+21	7.1938e+21
0.3445	6.8476e+21	6.8496e+21	6.8408e+21	6.8564e+21	6.9531e+21	6.9789e+21	6.9527e+21	6.9768e+21	7.1027e+21	7.0804e+21	7.1696e+21	7.1857e+21	7.1554e+21	7.0691e+21
0.34715	6.6943e+21	6.6728e+21	6.5958e+21	6.7061e+21	6.8091e+21	6.8628e+21	6.8305e+21	6.8924e+21	6.9779e+21	6.9773e+21	7.0915e+21	7.0604e+21	7.0382e+21	6.8946e+21
0.3498	6.485e+21	6.4244e+21	6.3691e+21	6.4741e+21	6.5275e+21	6.6827e+21	6.6828e+21	6.7875e+21	6.7929e+21	6.8122e+21	6.8885e+21	6.9021e+21	6.8784e+21	6.7306e+21
0.35245	6.2741e+21	6.1365e+21	6.1395e+21	6.1956e+21	6.2316e+21	6.4038e+21	6.4942e+21	6.5799e+21	6.607e+21	6.5803e+21	6.6556e+21	6.7167e+21	6.6991e+21	6.5356e+21
0.3551	6.0284e+21	5.8687e+21	5.9224e+21	5.9337e+21	5.9826e+21	6.1569e+21	6.2475e+21	6.3633e+21	6.4066e+21	6.3684e+21	6.4295e+21	6.5025e+21	6.5178e+21	6.3803e+21
0.35775	5.7012e+21	5.5948e+21	5.6391e+21	5.6461e+21	5.7612e+21	5.8828e+21	6.0357e+21	6.0952e+21	6.1482e+21	6.1895e+21	6.2349e+21	6.2605e+21	6.327e+21	6.2678e+21
0.3604	5.4184e+21	5.3089e+21	5.3932e+21	5.3593e+21	5.5274e+21	5.5881e+21	5.757e+21	5.8492e+21	5.9689e+21	6.0147e+21	6.0546e+21	5.9888e+21	6.1023e+21	6.0217e+21
0.36305	5.226e+21	5.1397e+21	5.2126e+21	5.2153e+21	5.3135e+21	5.4338e+21	5.5514e+21	5.6128e+21	5.7175e+21	5.8028e+21	5.8158e+21	5.7926e+21	5.8619e+21	5.7936e+21
0.3657	5.08e+21	5.0144e+21	5.0884e+21	5.0933e+21	5.1446e+21	5.2306e+21	5.3188e+21	5.4071e+21	5.4681e+21	5.645e+21	5.581e+21	5.5828e+21	5.6936e+21	5.6146e+21
0.36835	4.9604e+21	4.9184e+21	4.938e+21	4.9488e+21	4.9943e+21	5.0738e+21	5.1291e+21	5.2256e+21	5.2985e+21	5.407e+21	5.4031e+21	5.3651e+21	5.5275e+21	5.4103e+21
0.371	4.8477e+21	4.8554e+21	4.8499e+21	4.8585e+21	4.8807e+21	4.9391e+21	4.9674e+21	5.1099e+21	5.1341e+21	5.1923e+21	5.2764e+21	5.2015e+21	5.3262e+21	5.2974e+21
0.37365	4.8115e+21	4.7929e+21	4.803e+21	4.7842e+21	4.8312e+21	4.8322e+21	4.861e+21	4.9955e+21	5.0282e+21	5.0762e+21	5.1162e+21	5.0655e+21	5.2045e+21	5.2238e+21
0.3763	4.7578e+21	4.7502e+21	4.7385e+21	4.7197e+21	4.781e+21	4.7638e+21	4.8069e+21	4.8894e+21	4.9043e+21	4.9641e+21	4.9813e+21	4.9557e+21	5.0838e+21	5.1435e+21
0.37895	4.725e+21	4.7389e+21	4.6978e+21	4.6812e+21	4.7418e+21	4.7233e+21	4.7174e+21	4.8133e+21	4.8011e+21	4.858e+21	4.886e+21	4.8773e+21	4.9789e+21	5.0585e+21
0.3816	4.6644e+21	4.7046e+21	4.6756e+21	4.6453e+21	4.6856e+21	4.6596e+21	4.6632e+21	4.7451e+21	4.7324e+21	4.7581e+21	4.7956e+21	4.7887e+21	4.9058e+21	5.0039e+21
0.38425	4.6338e+21	4.6858e+21	4.6418e+21	4.6145e+21	4.635e+21	4.6234e+21	4.6209e+21	4.6779e+21	4.667e+21	4.7083e+21	4.7222e+21	4.7325e+21	4.8222e+21	4.9535e+21
0.3869	4.611e+21	4.6666e+21	4.5849e+21	4.6024e+21	4.574e+21	4.5941e+21	4.5764e+21	4.624e+21	4.642e+21	4.644e+21	4.6679e+21	4.6983e+21	4.7702e+21	4.9453e+21
0.38955	4.5706e+21	4.6098e+21	4.549e+21	4.5588e+21	4.5289e+21	4.5325e+21	4.5376e+21	4.5684e+21	4.6192e+21	4.6204e+21	4.6545e+21	4.6856e+21	4.7423e+21	4.8961e+21
0.3922	4.515e+21	4.5587e+21	4.526e+21	4.5198e+21	4.4953e+21	4.463e+21	4.5053e+21	4.5055e+21	4.5952e+21	4.6076e+21	4.6074e+21	4.6214e+21	4.6609e+21	4.8301e+21
0.39485	4.4868e+21	4.4914e+21	4.5039e+21	4.5086e+21	4.4426e+21	4.4367e+21	4.4616e+21	4.4831e+21	4.5547e+21	4.5635e+21	4.54e+21	4.558e+21	4.6081e+21	4.7934e+21
0.3975	4.4223e+21	4.4509e+21	4.4476e+21	4.4507e+21	4.3692e+21	4.4148e+21	4.4303e+21	4.4491e+21	4.5022e+21	4.5168e+21	4.501e+21	4.5263e+21	4.5691e+21	4.7722e+21
0.40015	4.4007e+21	4.4376e+21	4.4424e+21	4.4007e+21	4.3327e+21	4.4194e+21	4.4048e+21	4.4455e+21	4.4337e+21	4.4638e+21	4.4858e+21	4.4811e+21	4.5388e+21	4.7444e+21
0.4028	4.398e+21	4.4238e+21	4.4295e+21	4.3737e+21	4.3436e+21	4.4148e+21	4.3912e+21	4.4281e+21	4.3768e+21	4.4165e+21	4.427e+21	4.4727e+21	4.529e+21	4.698e+21
0.40545	4.4039e+21	4.4077e+21	4.3911e+21	4.342e+21	4.3348e+21	4.3818e+21	4.3413e+21	4.3911e+21	4.3804e+21	4.3951e+21	4.3952e+21	4.4385e+21	4.5296e+21	4.6586e+21
0.4081	4.3899e+21	4.3659e+21	4.3638e+21	4.3378e+21	4.3328e+21	4.3552e+21	4.3315e+21	4.3623e+21	4.374e+21	4.4003e+21	4.3941e+21	4.42e+21	4.5079e+21	4.6605e+21
0.41075	4.3949e+21	4.3577e+21	4.3682e+21	4.339e+21	4.3198e+21	4.323e+21	4.2933e+21	4.3703e+21	4.3603e+21	4.4061e+21	4.3973e+21	4.4005e+21	4.4862e+21	4.649e+21
0.4134	4.3788e+21	4.345e+21	4.3582e+21	4.3707e+21	4.3223e+21	4.3303e+21	4.2887e+21	4.3498e+21	4.3519e+21	4.3951e+21	4.4103e+21	4.3697e+21	4.4541e+21	4.6172e+21
0.41605	4.3863e+21	4.3605e+21	4.378e+21	4.3608e+21	4.352e+21	4.3299e+21	4.2725e+21	4.3346e+21	4.3172e+21	4.3601e+21	4.3893e+21	4.3392e+21	4.4214e+21	4.5941e+21
0.4187	4.3788e+21	4.3561e+21	4.381e+21	4.3465e+21	4.2989e+21	4.3064e+21	4.2825e+21	4.3163e+21	4.2868e+21	4.3024e+21	4.3384e+21	4.325e+21	4.3935e+21	4.5587e+21
0.42135	4.3477e+21	4.3388e+21	4.3489e+21	4.3176e+21	4.2652e+21	4.262e+21	4.2728e+21	4.2938e+21	4.2543e+21	4.2898e+21	4.3235e+21	4.3064e+21	4.3601e+21	4.5068e+21
0.424	4.3237e+21	4.3021e+21	4.3268e+21	4.2959e+21	4.2538e+21	4.2493e+21	4.2577e+21	4.2753e+21	4.2659e+21	4.3004e+21	4.3026e+21	4.2899e+21	4.3087e+21	4.4721e+21
0.42665	4.3143e+21	4.275e+21	4.3162e+21	4.2756e+21	4.2425e+21	4.2688e+21	4.2451e+21	4.2746e+21	4.2486e+21	4.2883e+21	4.2758e+21	4.2967e+21	4.273e+21	4.4767e+21
0.4293	4.2896e+21	4.2832e+21	4.295e+21	4.2754e+21	4.208e+21	4.2722e+21	4.2277e+21	4.2606e+21	4.2278e+21	4.273e+21	4.2716e+21	4.3081e+21	4.2644e+21	4.4399e+21
0.43195	4.2949e+21	4.2854e+21	4.2868e+21	4.2448e+21	4.2167e+21	4.2671e+21	4.2213e+21	4.2513e+21	4.2115e+21	4.2372e+21	4.2362e+21	4.3207e+21	4.28e+21	4.4097e+21
0.4346	4.315e+21	4.2731e+21	4.2578e+21	4.2385e+21	4.2343e+21	4.2494e+21	4.2219e+21	4.2601e+21	4.1951e+21	4.2306e+21	4.2476e+21	4.317e+21	4.2787e+21	4.3935e+21
0.43725	4.3066e+21	4.2321e+21	4.222e+21	4.2487e+21	4.2468e+21	4.2327e+21	4.2219e+21	4.2536e+21	4.1848e+21	4.2237e+21	4.2607e+21	4.2968e+21	4.2714e+21	4.4052e+21
0.4399	4.2985e+21	4.2283e+21	4.1974e+21	4.2343e+21	4.2462e+21	4.2246e+21	4.2224e+21	4.2272e+21	4.1825e+21	4.2041e+21	4.2674e+21	4.2906e+21	4.2818e+21	4.3933e+21
0.44255	4.2948e+21	4.2325e+21	4.1966e+21	4.2312e+21	4.2374e+21	4.2095e+21	4.2146e+21	4.2144e+21	4.1689e+21	4.2225e+21	4.254e+21	4.2529e+21	4.2633e+21	4.363e+21
0.4452	4.2966e+21	4.2602e+21	4.1947e+21	4.2538e+21	4.2082e+21	4.2107e+21	4.2081e+21	4.2269e+21	4.1706e+21	4.2226e+21	4.2357e+21	4.2058e+21	4.2168e+21	4.332e+21
0.44785	4.2715e+21	4.2597e+21	4.1955e+21	4.2497e+21	4.1807e+21	4.1785e+21	4.1952e+21	4.1875e+21	4.1625e+21	4.1946e+21	4.2186e+21	4.1751e+21	4.2071e+21	4.3112e+21
0.4505	4.2609e+21	4.2282e+21	4.1856e+21	4.2112e+21	4.1628e+21	4.1646e+21	4.1784e+21	4.1553e+21	4.1702e+21	4.1926e+21	4.1921e+21	4.1666e+21	4.1933e+21	4.3048e+21
0.45315	4.25e+21	4.1925e+21	4.172e+21	4.1738e+21	4.1647e+21	4.1309e+21	4.1705e+21	4.1426e+21	4.1853e+21	4.1941e+21	4.183e+21	4.1761e+21	4.1916e+21	4.2917e+21
0.4558	4.2277e+21	4.1849e+21	4.1992e+21	4.1851e+21	4.1773e+21	4.1395e+21	4.1704e+21	4.1424e+21	4.1688e+21	4.1897e+21	4.2085e+21	4.1907e+21	4.1936e+21	4.3118e+21
0.45845	4.2145e+21	4.1722e+21	4.1875e+21	4.1932e+21	4.1796e+21	4.1586e+21	4.1901e+21	4.1351e+21	4.1323e+21	4.1703e+21	4.1948e+21	4.1784e+21	4.1774e+21	4.3224e+21
0.4611	4.2104e+21	4.172e+21	4.1717e+21	4.175e+21	4.1648e+21	4.1312e+21	4.1781e+21	4.1189e+21	4.1352e+21	4.1656e+21	4.1644e+21	4.1845e+21	4.1681e+21	4.3225e+21
0.46375	4.1952e+21	4.1746e+21	4.1579e+21	4.1698e+21	4.1578e+21	4.1261e+21	4.1709e+21	4.1388e+21	4.1643e+21	4.1614e+21	4.1352e+21	4.1937e+21	4.1814e+21	4.2929e+21
0.4664	4.1924e+21	4.1567e+21	4.1566e+21	4.1836e+21	4.1628e+21	4.1346e+21	4.1596e+21	4.1528e+21	4.1375e+21	4.1589e+21	4.144e+21	4.1815e+21	4.1748e+21	4.2764e+21
0.46905	4.2218e+21	4.1621e+21	4.1478e+21	4.1562e+21	4.1811e+21	4.1522e+21	4.1691e+21	4.1393e+21	4.1e+21	4.1344e+21	4.1305e+21	4.1645e+21	4.1563e+21	4.2636e+21
0.4717	4.2282e+21	4.1651e+21	4.1245e+21	4.1277e+21	4.1644e+21	4.1597e+21	4.1358e+21	4.1129e+21	4.0839e+21	4.1298e+21	4.1251e+21	4.1228e+21	4.1324e+21	4.2562e+21
0.47435	4.2158e+21	4.168e+21	4.1112e+21	4.0845e+21	4.1224e+21	4.1504e+21	4.0981e+21	4.1134e+21	4.0923e+21	4.1273e+21	4.1032e+21	4.1184e+21	4.1004e+21	4.2581e+21
0.477	4.2019e+21	4.1725e+21	4.1115e+21	4.0841e+21	4.1202e+21	4.151e+21	4.0833e+21	4.1324e+21	4.1157e+21	4.1011e+21	4.0964e+21	4.1363e+21	4.1101e+21	4.2375e+21
0.47965	4.1802e+21	4.157e+21	4.1022e+21	4.0894e+21	4.0956e+21	4.1337e+21	4.0952e+21	4.1407e+21	4.106e+21	4.0784e+21	4.1079e+21	4.1257e+21	4.0813e+21	4.1925e+21
0.4823	4.139e+21	4.1269e+21	4.1005e+21	4.0764e+21	4.0682e+21	4.1191e+21	4.0858e+21	4.1215e+21	4.053e+21	4.0562e+21	4.0875e+21	4.0955e+21	4.0447e+21	4.1707e+21
0.48495	4.118e+21	4.1038e+21	4.0988e+21	4.0596e+21	4.0862e+21	4.1202e+21	4.0802e+21	4.0979e+21	4.0101e+21	4.0592e+21	4.0747e+21	4.0692e+21	4.0232e+21	4.1365e+21
0.4876	4.1231e+21	4.0675e+21	4.1295e+21	4.0449e+21	4.0892e+21	4.1203e+21	4.0745e+21	4.0936e+21	3.9759e+21	4.0382e+21	4.0698e+21	4.0606e+21	4.0284e+21	4.1201e+21
0.49025	4.1302e+21	4.0405e+21	4.1443e+21	4.0081e+21	4.0601e+21	4.0871e+21	4.0755e+21	4.0626e+21	3.9687e+21	4.0499e+21	4.051e+21	4.0652e+21	4.0294e+21	4.102e+21
0.4929	4.1324e+21	4.0508e+21	4.1208e+21	4.0002e+21	4.0631e+21	4.0758e+21	4.077e+21	4.0508e+21	3.9701e+21	4.0506e+21	4.0274e+21	4.0621e+21	4.0454e+21	4.1133e+21
0.49555	4.1052e+21	4.0461e+21	4.0677e+21	4.0143e+21	4.0435e+21	4.0835e+21	4.0699e+21	4.0258e+21	3.9763e+21	4.0241e+21	4.0473e+21	4.0588e+21	4.0373e+21	4.1267e+21
0.4982	4.0945e+21	4.0513e+21	4.048e+21	4.0304e+21	4.0234e+21	4.0845e+21	4.0557e+21	4.019e+21	3.9888e+21	4.041e+21	4.0366e+21	4.039e+21	4.0307e+21	4.1106e+21
0.50085	4.0864e+21	4.0544e+21	4.0553e+21	4.0309e+21	3.9925e+21	4.0691e+21	4.0604e+21	4.025e+21	3.9883e+21	4.0395e+21	4.0353e+21	4.0197e+21	4.0137e+21	4.0905e+21
0.5035	4.0664e+21	4.0636e+21	4.0718e+21	4.0443e+21	4.0018e+21	4.0886e+21	4.055e+21	4.0297e+21	3.9793e+21	4.0291e+21	4.0359e+21	4.0359e+21	4.0154e+21	4.0896e+21
0.50615	4.0781e+21	4.0656e+21	4.0775e+21	4.0606e+21	3.9966e+21	4.0925e+21	4.0485e+21	4.0132e+21	3.9416e+21	3.9986e+21	4.0097e+21	4.0451e+21	4.0222e+21	4.083e+21
0.5088	4.0771e+21	4.0565e+21	4.0621e+21	4.0553e+21	3.9876e+21	4.0971e+21	4.0293e+21	3.9821e+21	3.9361e+21	3.9761e+21	3.9966e+21	4.0601e+21	4.0102e+21	4.0604e+21
0.51145	4.0802e+21	4.0291e+21	4.0608e+21	4.0495e+21	3.9867e+21	4.0817e+21	4.0276e+21	3.9743e+21	3.9299e+21	3.959e+21	3.9905e+21	4.0453e+21	3.9929e+21	4.047e+21
[truncated: 384 more rows]

## Sheet: Figure 5 discharge
Figure 5 (discharge)	Spatial evolution of 6Li content during cycling in the separator
[truncated: 580 more rows]

[truncated: 13 more sheets: Figure 5 charge, Figure 6 discharge, Figure 6 charge, Figure S2, Figure S4a, Figure S4b, Figure S4c , Figure S4d , Figure S5a, Figure S5b, Figure S6, Figure S7, Figure S8]
